# Supplementary material for: WDR-5 exhibits H3K4 methylation-independent activity during embryonic development in C. elegans
Source: Epigenetics Chromatin. 2026 Mar 25;19:19. doi: 10.1186/s13072-026-00669-y (PMC13141272; doi:10.1186/s13072-026-00669-y)
Supplement: Supplementary file 13 — Supplementary Material 13. [file 13072_2026_669_MOESM13_ESM.xlsx]

## Sheet: rbbp-5 DEGs
WBGeneID	WT_1	WT_2	WT_3	rbbp5_1	rbbp5_2	rbbp5_3	WT_1_norm	WT_2_norm	WT_3_norm	rbbp5_1_norm	rbbp5_2_norm	rbbp5_3_norm	baseMean	baseMeanA	baseMeanB	foldChange	log2FoldChange	pval	padj	chrom	start	end	strand
WBGene00011594	289	160	135	11386	132	821	148.912	187.027	192.62	6685.94	191.729	1063.88	1411.69	176.186	2647.18	15.0249	3.90928	6.40286e-36	1.17179e-31	chrIV	10533897	10536410	plus
WBGene00001544	1314	564	486	7533	2493	3490	677.058	659.272	693.434	4423.43	3621.07	4522.48	2432.79	676.588	4188.99	6.19135	2.63025	3.32672e-19	1.52206e-15	chrII	3250989	3259358	minus
WBGene00015236	1099	335	280	4839	2854	2700	566.276	391.589	399.509	2841.5	4145.42	3498.77	1973.84	452.458	3495.23	7.72498	2.94953	3.71335e-17	8.49476e-14	chrI	10648590	10654168	minus
WBGene00021779	103	42	44	70	871	397	53.0723	49.0947	62.78	41.1045	1265.12	514.448	330.937	54.9823	606.892	11.0379	3.4644	6.00984e-17	1.22207e-13	chrII	1467734	1469681	plus
WBGene00000059	243	121	82	807	1146	620	125.209	141.439	116.999	473.876	1664.56	803.421	554.251	127.883	980.619	7.66811	2.93887	4.72666e-16	8.65026e-13	chrII	14373755	14377814	minus
WBGene00010212	46354	18580	13223	2372	554	799	23884.6	21718.6	18866.8	1392.86	804.682	1035.38	11283.8	21490	1077.64	0.050146	-4.31772	1.1334e-15	1.88566e-12	chrV	17640646	17650496	minus
WBGene00010041	295	187	118	4523	91	344	152.003	218.588	168.365	2655.94	132.177	445.769	628.807	179.652	1077.96	6.00027	2.58503	3.02025e-14	4.45612e-11	chrII	8566469	8566806	minus
WBGene00017467	290	142	118	700	196	1820	149.427	165.987	168.365	411.045	284.689	2358.43	589.657	161.259	1018.05	6.31315	2.65836	3.65236e-14	4.45612e-11	chrV	5132726	5137085	plus
WBGene00017683	40836	16760	11628	3556	923	834	21041.4	19591.1	16591	2088.11	1340.65	1080.73	10288.8	19074.5	1503.16	0.0788049	-3.66557	1.8687e-13	1.79995e-10	chrII	6097802	6099635	plus
WBGene00003579	802	381	298	1628	2396	1460	413.243	445.359	425.192	955.973	3480.18	1891.93	1268.65	427.931	2109.36	4.9292	2.30135	3.14332e-13	2.73933e-10	chrV	2662963	2665001	minus
WBGene00017489	96	71	59	1790	124	248	49.4654	82.9934	84.1823	1051.1	180.109	321.368	294.87	72.2137	517.526	7.16659	2.84129	3.54215e-13	2.94658e-10	chrIV	4293613	4299076	minus
WBGene00011185	973	425	386	7368	642	1330	501.353	496.792	550.752	4326.54	932.502	1723.47	1421.9	516.299	2327.5	4.50806	2.17251	8.87273e-13	6.76582e-10	chrV	13932567	13934631	minus
WBGene00006418	467	257	206	5985	80	334	240.629	300.413	293.925	3514.43	116.2	432.811	816.402	278.322	1354.48	4.8666	2.28291	1.86833e-12	1.31509e-09	chrV	9144593	9146877	minus
WBGene00020192	356	198	230	9852	42	311	183.434	231.446	328.168	5785.16	61.0048	403.006	1165.37	247.683	2083.06	8.41018	3.07214	2.50057e-12	1.69492e-09	chrI	3853838	3854242	plus
WBGene00020774	659	331	288	503	2099	1481	339.56	386.913	410.924	295.365	3048.79	1919.14	1066.78	379.132	1754.43	4.62749	2.21023	3.95358e-12	2.49498e-09	chrII	3753924	3757359	plus
WBGene00021389	337	238	239	11176	98	524	173.644	278.203	341.01	6562.63	142.345	679.02	1362.81	264.286	2461.33	9.31314	3.21927	6.19965e-12	3.65999e-09	chrV	6057347	6063408	minus
WBGene00020223	298	188	163	360	1311	675	153.549	219.757	232.571	211.395	1904.22	874.692	599.364	201.959	996.769	4.9355	2.3032	9.14046e-12	5.06908e-09	chrII	4668641	4671787	minus
WBGene00017717	632	401	358	6012	550	1107	325.647	468.737	510.801	3530.29	798.872	1434.49	1178.14	435.062	1921.22	4.41597	2.14273	1.27345e-11	6.65871e-09	chrX	5999573	6001499	minus
WBGene00003178	122	82	80	2744	13	115	62.8623	95.8516	114.145	1611.3	18.8824	149.022	342.01	90.9531	593.067	6.52058	2.705	1.38267e-11	7.01743e-09	chrIV	7983850	7987171	minus
WBGene00001091	441	266	240	3979	205	866	227.232	310.933	342.436	2336.5	297.761	1122.2	772.843	293.534	1252.15	4.26578	2.09281	1.98255e-11	9.30326e-09	chrIV	6613907	6618487	minus
WBGene00007153	192	151	113	2997	104	591	98.9309	176.507	161.23	1759.86	151.059	765.841	518.905	145.556	892.254	6.12996	2.61588	3.83623e-11	1.75517e-08	chrV	13134926	13138071	minus
WBGene00001403	1068	528	529	9849	195	1019	550.303	617.191	754.787	5783.4	283.237	1320.46	1551.56	640.76	2462.37	3.84288	1.94219	4.2336e-11	1.88973e-08	chrIV	9540789	9546233	plus
WBGene00007791	705	349	243	1049	2015	1109	363.262	407.954	346.717	615.98	2926.78	1437.09	1016.3	372.644	1659.95	4.45451	2.15527	4.65297e-11	2.02748e-08	chrIII	4423686	4429471	minus
WBGene00016953	103	102	101	1105	2940	1484	53.0723	119.23	144.109	648.864	4270.34	1923.03	1193.11	105.47	2280.74	21.6245	4.43459	6.74841e-11	2.87216e-08	chrIV	5685282	5688293	plus
WBGene00019997	202	76	82	338	815	382	104.084	88.838	116.999	198.476	1183.78	495.011	364.532	103.307	625.757	6.05726	2.59867	8.07757e-11	3.35972e-08	chrIII	2937039	2944036	minus
WBGene00012668	240	143	124	1491	257	689	123.664	167.156	176.925	875.526	373.291	892.834	434.899	155.915	713.884	4.57867	2.19493	3.91182e-10	1.4318e-07	chrV	19157630	19158791	minus
WBGene00010285	2278	1063	1027	18393	376	1504	1173.77	1242.56	1465.34	10800.5	546.138	1948.94	2862.88	1293.89	4431.86	3.42521	1.77619	5.10077e-10	1.83038e-07	chrV	11929086	11929971	plus
WBGene00007328	457	218	122	427	1297	786	235.476	254.825	174.072	250.737	1883.89	1018.53	636.254	221.458	1051.05	4.74606	2.24673	6.58041e-10	2.20261e-07	chrII	9918066	9920509	minus
WBGene00011561	582	370	370	6845	532	1315	299.884	432.501	527.923	4019.43	772.727	1704.03	1292.75	420.103	2165.4	5.15445	2.36582	6.73984e-10	2.20261e-07	chrIII	10337746	10339341	plus
WBGene00045062	1032	506	296	3058	1380	1703	531.753	591.474	422.338	1795.68	2004.44	2206.82	1258.75	515.189	2002.31	3.88656	1.95849	8.25618e-10	2.60511e-07	chrIV	13456952	13460229	minus
WBGene00001387	2854	1656	1702	31148	864	5042	1470.57	1935.73	2428.44	18290.3	1254.96	6533.63	5318.94	1944.91	8692.97	4.46959	2.16014	1.29697e-09	3.95598e-07	chrV	12996803	12997509	minus
WBGene00007343	524	324	316	7168	92	403	269.999	378.731	450.875	4209.1	133.63	522.224	994.093	366.535	1621.65	4.42428	2.14544	1.86054e-09	5.58191e-07	chrX	12941371	12943477	minus
WBGene00019248	141	82	52	150	556	405	72.6524	95.8516	74.1946	88.0811	807.587	524.815	277.197	80.8995	473.495	5.85287	2.54915	2.50303e-09	7.27109e-07	chrI	6845179	6846953	minus
WBGene00010652	271	160	150	1910	156	652	139.637	187.027	214.023	1121.57	226.589	844.888	455.622	180.229	731.014	4.05603	2.02007	2.67925e-09	7.66141e-07	chrI	11483382	11484561	plus
WBGene00011951	352	227	171	844	903	693	181.373	265.345	243.986	495.603	1311.6	898.017	565.988	230.235	901.741	3.91661	1.96961	6.36621e-09	1.73579e-06	chrIV	12723080	12724579	minus
WBGene00009109	210	110	114	2149	83	300	108.206	128.581	162.657	1261.91	120.557	388.752	361.777	133.148	590.406	4.4342	2.14867	6.44957e-09	1.73579e-06	chrV	10540357	10545718	plus
WBGene00044760	311	150	142	391	881	633	160.247	175.338	202.608	229.598	1279.65	820.267	477.951	179.398	776.504	4.32839	2.11383	7.95059e-09	2.10875e-06	chrIII	2802442	2803673	plus
WBGene00020260	131	49	70	1659	67	121	67.4997	57.2771	99.8773	974.177	97.3172	156.797	242.157	74.8847	409.43	5.46747	2.45087	9.14018e-09	2.32505e-06	chrI	6192289	6194901	minus
WBGene00021928	552	226	196	3314	343	595	284.426	264.176	279.656	1946	498.206	771.025	673.916	276.086	1071.74	3.88192	1.95677	9.14723e-09	2.32505e-06	chrIV	1038669	1041008	minus
WBGene00001622	88	45	48	1453	28	84	45.3433	52.6015	68.4873	853.212	40.6699	108.851	194.861	55.4774	334.244	6.02487	2.59093	1.13593e-08	2.80928e-06	chrX	6403385	6406876	plus
WBGene00008568	279	149	95	970	546	500	143.759	174.169	135.548	569.591	793.062	647.92	410.675	151.159	670.191	4.43369	2.14851	1.2443e-08	3.03627e-06	chrI	12955327	12957891	minus
WBGene00010135	971	642	585	4719	843	3261	500.322	750.448	834.689	2771.03	1224.45	4225.73	1717.78	695.153	2740.41	3.94216	1.97899	1.74209e-08	4.19499e-06	chrI	8893301	8894130	minus
WBGene00008495	88	86	72	1952	78	507	45.3433	100.527	102.731	1146.23	113.295	656.991	360.853	82.8672	638.838	7.70918	2.94658	2.66743e-08	6.10209e-06	chrII	14001611	14002226	minus
WBGene00022145	510	296	167	807	1238	731	262.785	346.001	238.279	473.876	1798.19	947.259	677.731	282.355	1073.11	3.80057	1.92621	2.82561e-08	6.35584e-06	chrI	1799719	1807011	plus
WBGene00001548	436	243	247	2392	459	636	224.656	284.048	352.424	1404.6	666.695	824.154	626.096	287.043	965.15	3.36239	1.74949	2.85791e-08	6.35584e-06	chrIV	3282882	3289334	minus
WBGene00009968	784	361	229	5430	166	611	403.968	421.981	326.741	3188.53	241.114	791.758	895.683	384.23	1407.14	3.66222	1.87272	2.88255e-08	6.35584e-06	chrV	10967952	10980755	minus
WBGene00019368	734	251	244	1523	1313	793	378.205	293.399	348.144	894.316	1907.13	1027.6	808.132	339.916	1276.35	3.75489	1.90877	4.05415e-08	8.42838e-06	chrIV	1510563	1515301	plus
WBGene00004249	170	128	134	1569	754	710	87.595	149.622	191.194	921.328	1095.18	920.046	560.828	142.804	978.852	6.85453	2.77706	4.13565e-08	8.42838e-06	chrIII	1821141	1824105	minus
WBGene00000048	113	89	68	1652	25	152	58.2249	104.034	97.0236	970.066	36.3124	196.968	243.771	86.4275	401.115	4.64106	2.21445	4.18943e-08	8.42838e-06	chrX	13642278	13646828	minus
WBGene00000233	276	174	170	3050	94	301	142.213	203.392	242.559	1790.98	136.535	390.048	484.288	196.055	772.521	3.94033	1.97832	4.19093e-08	8.42838e-06	chrV	13498772	13511705	minus
WBGene00007754	293	217	180	3370	83	509	150.973	253.656	256.827	1978.89	120.557	659.583	570.081	220.485	919.676	4.17114	2.06044	5.64972e-08	1.09995e-05	chrV	12138232	12140259	plus
WBGene00019793	993	464	356	719	2454	1018	511.658	542.38	507.947	422.202	3564.42	1319.17	1144.63	520.662	1768.6	3.39683	1.76419	5.72267e-08	1.10243e-05	chrII	3641503	3644085	plus
WBGene00022252	294	116	112	2057	147	350	151.488	135.595	159.804	1207.89	213.517	453.544	386.972	148.962	624.982	4.19558	2.06887	5.80657e-08	1.10694e-05	chrIV	6442276	6446541	plus
WBGene00009957	347	220	199	1944	169	783	178.797	257.163	283.937	1141.53	245.472	1014.64	520.257	239.965	800.548	3.3361	1.73816	7.52437e-08	1.40514e-05	chrIV	12526225	12527317	minus
WBGene00007405	4144	2526	2259	24824	2143	5036	2135.26	2952.7	3223.18	14576.8	3112.7	6525.85	5421.09	2770.38	8071.79	2.91361	1.54281	8.67052e-08	1.60282e-05	chrIII	9663208	9667445	minus
WBGene00021530	556	290	225	418	1411	801	286.487	338.987	321.034	245.453	2049.47	1037.97	713.233	315.503	1110.96	3.52125	1.81609	1.00089e-07	1.81359e-05	chrX	2998293	3003793	minus
WBGene00019154	11830	5888	5073	75049	1774	6506	6095.58	6882.61	7238.25	44069.3	2576.73	8430.73	12548.9	6738.81	18358.9	2.72435	1.44591	1.13485e-07	2.01639e-05	chrIV	5885823	5889793	plus
WBGene00007489	88	59	39	196	402	196	45.3433	68.9664	55.6459	115.093	583.903	253.985	187.156	56.6519	317.66	5.60723	2.48729	1.20967e-07	2.12867e-05	chrII	10714854	10716395	plus
WBGene00001386	743	431	387	3839	444	1015	382.842	503.805	552.179	2254.29	644.908	1315.28	942.217	479.609	1404.82	2.92911	1.55046	1.24655e-07	2.15219e-05	chrIII	9081602	9082813	plus
WBGene00000481	120	48	63	1332	73	123	61.8318	56.1082	89.8896	782.16	106.032	159.388	209.235	69.2765	349.193	5.04057	2.33359	1.27098e-07	2.17385e-05	chrIV	3613782	3624692	minus
WBGene00006894	2525	930	739	2253	4307	2784	1301.04	1087.1	1054.42	1322.98	6255.9	3607.62	2438.18	1147.52	3728.83	3.24947	1.7002	1.28574e-07	2.17873e-05	chrIII	156823	163541	plus
WBGene00009543	365	166	87	1259	513	456	188.072	194.041	124.133	739.294	745.13	590.903	430.262	168.749	691.776	4.09944	2.03543	1.64726e-07	2.7159e-05	chrIV	9463513	9467501	minus
WBGene00019592	85	51	43	856	48	219	43.7975	59.615	61.3532	502.649	69.7198	283.789	170.154	54.9219	285.386	5.19621	2.37746	1.8427e-07	2.98436e-05	chrII	2280683	2282881	minus
WBGene00016219	88	83	60	1694	24	221	45.3433	97.0205	85.6091	994.729	34.8599	286.381	257.324	75.991	438.656	5.77248	2.52919	1.97241e-07	3.13887e-05	chrIII	120491	124685	plus
WBGene00194904	1410	668	549	963	2887	1774	726.524	780.84	783.323	565.48	4193.35	2298.82	1558.06	763.562	2352.55	3.08102	1.62341	2.03158e-07	3.17777e-05	chrV	2626164	2629997	minus
WBGene00044463	218	148	140	2858	45	141	112.328	173	199.755	1678.24	65.3623	182.713	401.899	161.694	642.105	3.9711	1.98954	2.45056e-07	3.79139e-05	chrIV	1219333	1221206	minus
WBGene00016273	921	620	512	2569	1696	1677	474.559	724.731	730.531	1508.54	2463.43	2173.12	1345.82	643.274	2048.36	3.18428	1.67097	2.4653e-07	3.79139e-05	chrII	7299530	7301599	plus
WBGene00050912	690	403	270	777	1481	1012	355.533	471.075	385.241	456.26	2151.15	1311.39	855.107	403.95	1306.27	3.23373	1.6932	2.70822e-07	4.12201e-05	chrII	7371766	7372523	plus
WBGene00011508	14426	7924	7350	93478	2496	7733	7433.21	9262.53	10487.1	54890.9	3625.43	10020.7	15953.3	9060.95	22845.7	2.52134	1.33419	2.72533e-07	4.12201e-05	chrII	8048997	8050511	minus
WBGene00018054	158	104	56	497	324	388	81.4119	121.568	79.9018	291.842	470.608	502.786	258.02	94.2938	421.745	4.47267	2.16114	2.90716e-07	4.36098e-05	chrV	3289685	3295120	plus
WBGene00008579	1047	528	455	1530	1765	1527	539.482	617.191	649.202	898.427	2563.65	1978.75	1207.78	601.958	1813.61	3.01285	1.59113	3.20191e-07	4.76408e-05	chrII	13852239	13855218	plus
WBGene00044395	340	106	107	2969	5	116	175.19	123.906	152.67	1743.42	7.26248	150.317	392.127	150.588	633.666	4.20793	2.07311	3.4446e-07	5.04318e-05	chrII	6042768	6043248	minus
WBGene00009433	873	570	465	7226	86	550	449.826	666.285	663.47	4243.16	124.915	712.712	1143.39	593.194	1693.6	2.85504	1.51351	3.86789e-07	5.61795e-05	chrV	13741305	13745114	minus
WBGene00016461	80	57	43	179	348	210	41.2212	66.6285	61.3532	105.11	505.468	272.126	175.318	56.401	294.235	5.21684	2.38318	4.11937e-07	5.85126e-05	chrI	10807053	10808227	plus
WBGene00021977	887	495	489	1318	405	2802	457.04	578.616	697.714	773.939	588.261	3630.94	1121.09	577.79	1664.38	2.8806	1.52637	4.12443e-07	5.85126e-05	chrV	5077834	5080881	minus
WBGene00044461	203	94	75	1574	72	260	104.599	109.879	107.011	924.264	104.58	336.918	281.208	107.163	455.254	4.24824	2.08687	4.23077e-07	5.95595e-05	chrI	667618	674416	minus
WBGene00021947	143	71	93	103	754	293	73.6829	82.9934	132.694	60.4823	1095.18	379.681	304.119	96.4568	511.782	5.30581	2.40757	4.51999e-07	6.26669e-05	chrIV	756721	759084	plus
WBGene00010714	1641	856	704	9836	504	1081	845.55	1000.6	1004.48	5775.77	732.058	1400.8	1793.21	950.209	2636.21	2.77435	1.47215	4.57147e-07	6.29041e-05	chrIV	13434218	13445285	minus
WBGene00008582	460	375	303	3515	987	975	237.022	438.346	432.326	2064.03	1433.61	1263.44	978.13	369.231	1587.03	4.2982	2.10373	4.80767e-07	6.56605e-05	chrIV	12412946	12417640	minus
WBGene00001555	325	111	118	991	497	408	167.461	129.75	168.365	581.922	721.89	528.703	383.015	155.192	610.838	3.93602	1.97674	4.8649e-07	6.595e-05	chrI	13325351	13333549	plus
WBGene00013711	753	352	241	3940	301	702	387.995	411.46	343.863	2313.6	437.201	909.68	800.632	381.106	1220.16	3.20163	1.6788	5.36403e-07	7.21817e-05	chrI	10323783	10327748	minus
WBGene00012704	568	262	292	3859	123	513	292.671	306.257	416.631	2266.03	178.657	664.766	687.502	338.52	1036.49	3.06182	1.61439	6.07683e-07	7.94372e-05	chrIV	12222848	12227030	minus
WBGene00011676	874	475	327	4322	503	793	450.342	555.238	466.57	2537.91	730.605	1027.6	961.377	490.716	1432.04	2.91826	1.54511	6.49144e-07	8.42552e-05	chrII	9783759	9787339	minus
WBGene00002089	87	39	61	1712	58	141	44.8281	45.5879	87.0359	1005.3	84.2447	182.713	241.618	59.1506	424.086	7.16959	2.84189	6.82469e-07	8.77266e-05	chrII	6000465	6000987	plus
WBGene00044202	1815	720	405	168	149	76	935.206	841.623	577.861	98.6508	216.422	98.4838	461.375	784.897	137.852	0.175631	-2.50938	6.99875e-07	8.89473e-05	chrV	17273499	17274992	plus
WBGene00007903	1472	760	781	6791	1107	1132	758.47	888.38	1114.35	3987.72	1607.91	1466.89	1637.29	920.398	2354.18	2.55778	1.35489	7.53094e-07	9.48739e-05	chrX	14064246	14067915	minus
WBGene00006445	1452	910	801	3953	2476	1842	748.165	1063.72	1142.88	2321.23	3596.38	2386.94	1876.55	984.922	2768.18	2.81056	1.49086	7.56876e-07	9.48739e-05	chrI	10501574	10505938	plus
WBGene00010348	96	51	38	1116	17	129	49.4654	59.615	54.2191	655.323	24.6924	167.163	168.413	54.4332	282.393	5.18788	2.37515	8.34353e-07	0.000103874	chrIV	11803250	11804093	minus
WBGene00001477	1182	681	616	3653	606	2285	609.043	796.035	878.92	2145.07	880.212	2960.99	1378.38	761.333	1995.42	2.62096	1.3901	8.79416e-07	0.000108015	chrIV	10682504	10684365	plus
WBGene00010907	273	151	149	2053	135	285	140.667	176.507	212.596	1205.54	196.087	369.314	383.451	176.59	590.312	3.34284	1.74107	9.66506e-07	0.000117139	chrIII	4549031	4551473	plus
WBGene00004969	2915	1241	1029	7585	2719	2841	1502	1450.63	1468.2	4453.97	3949.33	3681.48	2750.93	1473.61	4028.26	2.7336	1.4508	1.01406e-06	0.000122094	chrI	1446668	1465342	plus
WBGene00022295	175	106	88	1139	192	243	90.1714	123.906	125.56	668.829	278.879	314.889	267.039	113.212	420.866	3.71749	1.89433	1.11365e-06	0.000132344	chrIV	2037191	2043191	plus
WBGene00013592	621	275	306	3457	173	695	319.98	321.453	436.606	2029.97	251.282	900.609	709.984	359.346	1060.62	2.95153	1.56146	1.18907e-06	0.000139495	chrII	13091517	13094202	plus
WBGene00018726	131	102	90	1994	2	117	67.4997	119.23	128.414	1170.89	2.90499	151.613	273.425	105.048	441.803	4.20573	2.07236	1.21058e-06	0.000141114	chrX	8708313	8709318	plus
WBGene00003565	147	75	57	782	195	247	75.744	87.6691	81.3286	459.196	283.237	320.072	217.874	81.5806	354.168	4.34133	2.11814	1.24013e-06	0.000141631	chrX	1054211	1056686	plus
WBGene00011454	396	268	252	3827	127	523	204.045	313.271	359.558	2247.24	184.467	677.724	664.384	292.291	1036.48	3.54604	1.82621	1.24598e-06	0.000141631	chrIV	9560770	9566588	minus
WBGene00007891	145	37	56	1549	12	54	74.7134	43.2501	79.9018	909.584	17.4299	69.9754	199.142	65.9551	332.33	5.03873	2.33306	1.27636e-06	0.000144189	chrII	11370251	11372009	minus
WBGene00003890	194	174	163	3508	153	637	99.9614	203.392	232.571	2059.92	222.232	825.45	607.255	178.642	1035.87	5.79858	2.5357	1.32463e-06	0.000147818	chrIII	7243243	7245673	plus
WBGene00019619	140	89	95	824	97	465	72.1371	104.034	135.548	483.859	140.892	602.566	256.506	103.906	409.105	3.93725	1.97719	1.37853e-06	0.000152639	chrX	6444148	6446701	minus
WBGene00021288	344	154	130	469	802	416	177.251	180.014	185.486	275.4	1164.9	539.069	420.354	180.917	659.79	3.64692	1.86668	1.38452e-06	0.000152639	chrII	3114258	3116762	plus
WBGene00004157	6157	3740	2847	2813	13072	6159	3172.49	4371.77	4062.15	1651.81	18987	7981.08	6704.39	3868.8	9539.97	2.46587	1.3021	1.511e-06	0.0001646	chrIV	4072320	4077629	plus
WBGene00017964	204	177	131	927	142	1142	105.114	206.899	186.913	544.341	206.254	1479.85	454.895	166.309	743.482	4.47049	2.16043	1.62403e-06	0.000175866	chrV	6276423	6278137	plus
WBGene00015645	763	411	375	4944	137	628	393.147	480.427	535.057	2903.15	198.992	813.787	887.427	469.544	1305.31	2.77996	1.47506	1.67393e-06	0.000180203	chrII	553094	554785	plus
WBGene00009958	2963	1249	1231	15360	550	2016	1526.73	1459.98	1756.41	9019.5	798.872	2612.41	2862.32	1581.04	4143.6	2.6208	1.39001	1.77707e-06	0.000188518	chrI	8931028	8942280	minus
WBGene00008229	83	71	63	1581	30	60	42.767	82.9934	89.8896	928.374	43.5749	77.7504	210.892	71.8833	349.9	4.86761	2.28321	1.78206e-06	0.000188518	chrV	9526709	9529226	plus
WBGene00019289	962	529	435	1885	1714	919	495.685	618.359	620.666	1106.89	2489.58	1190.88	1087.01	578.237	1595.78	2.75973	1.46453	1.85092e-06	0.000193564	chrII	7425893	7431348	minus
WBGene00018470	308	144	143	2538	56	188	158.702	168.325	204.035	1490.33	81.3397	243.618	391.058	177.02	605.096	3.41823	1.77325	1.92958e-06	0.000200644	chrIV	7628197	7629029	minus
WBGene00010722	202	124	130	1360	134	374	104.084	144.946	185.486	798.602	194.634	484.644	318.733	144.839	492.627	3.40121	1.76605	2.20747e-06	0.000226949	chrII	14114137	14122090	minus
WBGene00003590	464	268	203	3074	109	434	239.083	313.271	289.644	1805.07	158.322	562.395	561.298	280.666	841.93	2.99976	1.58485	2.51864e-06	0.000253262	chrIII	4442053	4444211	plus
WBGene00018232	108	45	46	732	107	181	55.6486	52.6015	65.6336	429.836	155.417	234.547	165.614	57.9612	273.267	4.71464	2.23715	2.59423e-06	0.000258027	chrI	2645268	2657243	minus
WBGene00003672	185	69	23	3813	57	82	95.324	80.6556	32.8168	2239.02	82.7922	106.259	439.478	69.5988	809.357	11.6289	3.53964	2.82774e-06	0.000276941	chrI	12245447	12246742	plus
WBGene00003741	315	156	180	2244	105	308	162.308	182.352	256.827	1317.69	152.512	399.119	411.802	200.496	623.108	3.10783	1.63591	2.82979e-06	0.000276941	chrX	13177785	13178385	minus
WBGene00022236	288	128	78	505	563	376	148.396	149.622	111.292	296.54	817.755	487.236	335.14	136.437	533.843	3.91276	1.96818	2.92037e-06	0.000284286	chrIV	6317036	6321346	minus
WBGene00017157	300	113	89	1406	233	292	154.579	132.088	126.987	825.613	338.431	378.385	326.014	137.885	514.143	3.72879	1.89871	3.07642e-06	0.000296324	chrX	6996831	7005532	minus
WBGene00017406	1566	989	806	1094	3488	1590	806.905	1156.06	1150.02	642.405	5066.3	2060.39	1813.68	1037.66	2589.7	2.49571	1.31945	3.14079e-06	0.000296787	chrII	3730155	3731551	minus
WBGene00019754	102	95	56	1609	39	155	52.557	111.048	79.9018	944.816	56.6473	200.855	240.971	81.1688	400.773	4.93752	2.30379	3.24714e-06	0.000304748	chrV	5617638	5618325	plus
WBGene00011903	1270	471	334	221	50	21	654.387	550.562	476.557	129.773	72.6248	27.2126	318.519	560.502	76.5367	0.13655	-2.8725	3.40968e-06	0.000318371	chrX	10886092	10887746	plus
WBGene00011928	91	53	68	1437	39	127	46.8891	61.9528	97.0236	843.817	56.6473	164.572	211.817	68.6219	355.012	5.17345	2.37113	3.46736e-06	0.000321728	chrII	8630733	8634264	minus
WBGene00001543	319	227	153	1632	323	376	164.37	265.345	218.303	958.322	469.156	487.236	427.122	216.006	638.238	2.95472	1.56302	3.5942e-06	0.00033054	chrIV	12860113	12865911	plus
WBGene00009917	403	183	192	2979	65	248	207.652	213.913	273.949	1749.29	94.4122	321.368	476.764	231.838	721.69	3.11291	1.63826	3.77334e-06	0.000344409	chrI	7339202	7345947	plus
WBGene00008726	283	161	169	771	258	728	145.82	188.196	241.132	452.737	374.744	943.371	391	191.716	590.284	3.07895	1.62244	4.04772e-06	0.00036672	chrV	16394011	16395057	minus
WBGene00044488	224	172	191	2490	242	1008	115.419	201.054	272.522	1462.15	351.504	1306.21	618.142	196.332	1039.95	5.2969	2.40515	4.08762e-06	0.000367433	chrIV	2805855	2809028	plus
WBGene00006064	503	299	271	3390	128	436	259.178	349.508	386.668	1990.63	185.919	564.986	622.815	331.785	913.846	2.75434	1.4617	4.11868e-06	0.000367433	chrX	5307464	5323353	minus
WBGene00016468	303	143	145	2226	96	220	156.125	167.156	206.889	1307.12	139.44	285.085	376.97	176.723	577.216	3.26621	1.70762	4.13591e-06	0.000367433	chrX	7089185	7096406	minus
WBGene00044484	215	134	142	1927	78	324	110.782	156.635	202.608	1131.55	113.295	419.852	355.787	156.675	554.898	3.54171	1.82445	4.20352e-06	0.000369849	chrIV	5040918	5045388	minus
WBGene00018031	175	73	63	1437	101	86	90.1714	85.3313	89.8896	843.817	146.702	111.442	227.892	88.4641	367.32	4.1522	2.05388	4.33858e-06	0.000376767	chrX	17019543	17020732	minus
WBGene00018809	120	66	32	1402	5	43	61.8318	77.1488	45.6582	823.264	7.26248	55.7211	178.481	61.5463	295.416	4.7999	2.263	4.37302e-06	0.000376767	chrII	3825663	3827881	minus
WBGene00018885	149	125	87	1415	42	297	76.7745	146.115	124.133	830.898	61.0048	384.864	270.632	115.674	425.589	3.6792	1.87939	4.60198e-06	0.000393555	chrX	8344648	8346307	minus
WBGene00003664	51	101	45	7370	62	231	26.2785	118.061	64.2068	4327.72	90.0547	299.339	820.943	69.5155	1572.37	22.619	4.49946	4.75912e-06	0.0004051	chrI	11429062	11432054	plus
WBGene00021463	57291	22003	14216	9717	7703	6542	29520	25719.8	20283.6	5705.89	11188.6	8477.39	16815.9	25174.5	8457.28	0.335946	-1.5737	4.89485e-06	0.000414295	chrI	2342218	2350470	plus
WBGene00020086	111	86	68	1173	49	146	57.1944	100.527	97.0236	688.794	71.1723	189.193	200.651	84.9151	316.386	3.72591	1.89759	5.00169e-06	0.00041989	chrX	17483265	17486756	minus
WBGene00003736	1430	847	1007	16888	465	2472	736.829	990.076	1436.81	9916.75	675.41	3203.32	2826.53	1054.57	4598.49	4.36054	2.12451	5.43038e-06	0.000451733	chrIV	11930847	11935691	plus
WBGene00015921	101	61	42	1024	16	146	52.0418	71.3042	59.9264	601.3	23.2399	189.193	166.167	61.0908	271.244	4.44002	2.15057	5.49409e-06	0.000454966	chrX	8173860	8180852	plus
WBGene00004364	2830	1550	1523	14536	917	2465	1458.2	1811.83	2173.04	8535.64	1331.94	3194.25	3084.15	1814.36	4353.94	2.39972	1.26286	5.64392e-06	0.000465268	chrV	10261105	10270289	minus
WBGene00008292	953	396	379	5861	113	448	491.048	462.893	540.764	3441.62	164.132	580.536	946.832	498.235	1395.43	2.80075	1.48581	5.72055e-06	0.000466383	chrI	12449982	12452019	plus
WBGene00019001	5939	2886	2900	25812	2194	4538	3060.16	3373.51	4137.77	15157	3186.77	5880.52	5799.29	3523.81	8074.76	2.29148	1.19628	5.73991e-06	0.000466383	chrI	6569495	6572601	plus
WBGene00020143	709	434	378	4503	144	596	365.323	507.312	539.337	2644.19	209.159	772.321	839.608	470.657	1208.56	2.56781	1.36054	5.76832e-06	0.000466383	chrX	16786371	16787547	plus
WBGene00007229	1548	966	940	12537	348	1510	797.63	1129.18	1341.21	7361.82	505.468	1956.72	2182	1089.34	3274.67	3.0061	1.5879	6.07513e-06	0.000483395	chrII	9293977	9295693	minus
WBGene00013651	398	183	110	286	877	449	205.075	213.913	156.95	167.941	1273.84	581.832	433.258	191.979	674.537	3.51359	1.81295	6.18716e-06	0.000488066	chrIV	15937080	15941459	minus
WBGene00015795	502	270	183	627	1004	577	258.663	315.609	261.108	368.179	1458.31	747.7	568.261	278.46	858.061	3.08145	1.62361	6.28387e-06	0.000493567	chrII	6979909	6988587	plus
WBGene00007565	54	61	63	1535	73	351	27.8243	71.3042	89.8896	901.363	106.032	454.84	275.209	63.006	487.412	7.73595	2.95158	6.32406e-06	0.000494601	chrV	18157999	18159582	plus
WBGene00044522	534	253	227	383	1114	666	275.152	295.737	323.888	224.9	1618.08	863.029	600.131	298.259	902.003	3.02423	1.59657	6.46748e-06	0.000501531	chrV	2631752	2638077	minus
WBGene00010050	728	216	245	1937	646	718	375.113	252.487	349.57	1137.42	938.312	930.413	663.886	325.723	1002.05	3.07638	1.62123	6.69698e-06	0.000514964	chrII	11569745	11570936	plus
WBGene00010274	131	108	60	1599	17	136	67.4997	126.244	85.6091	938.944	24.6924	176.234	236.537	93.1174	379.957	4.08041	2.02871	7.05163e-06	0.000535485	chrIV	9653518	9654210	plus
WBGene00018943	275	123	118	337	630	367	141.698	143.777	168.365	197.889	915.072	475.573	340.396	151.28	529.511	3.50021	1.80744	7.18709e-06	0.000543516	chrX	1365469	1367511	minus
WBGene00022623	1088	538	458	5717	258	821	560.608	628.88	653.483	3357.06	374.744	1063.88	1106.44	614.324	1598.56	2.60215	1.37971	7.4936e-06	0.000563076	chrV	6727821	6730245	plus
WBGene00019243	8807	3548	2167	1313	1290	949	4537.94	4147.33	3091.92	771.003	1873.72	1229.75	2608.61	3925.73	1291.49	0.328981	-1.60392	7.67381e-06	0.000573218	chrV	722696	723828	minus
WBGene00009412	762	417	355	562	1439	1051	392.632	487.44	506.52	330.01	2090.14	1361.93	861.445	462.198	1260.69	2.72761	1.44764	7.73589e-06	0.000575506	chrI	11741521	11743942	minus
WBGene00003057	556	435	342	4919	264	775	286.487	508.481	487.972	2888.47	383.459	1004.28	926.524	427.647	1425.4	3.33313	1.73688	7.84157e-06	0.000581006	chrV	12197414	12198606	minus
WBGene00001452	435	265	206	2444	197	440	224.14	309.764	293.925	1435.13	286.142	570.17	519.879	275.943	763.815	2.76802	1.46885	8.09514e-06	0.000594977	chrIV	12754535	12757650	minus
WBGene00021089	203	58	79	981	158	235	104.599	67.7974	112.719	576.05	229.494	304.522	232.53	95.0383	370.022	3.8934	1.96103	8.28949e-06	0.000606824	chrIV	3292117	3294630	plus
WBGene00006914	6339	3720	3636	45321	1143	4649	3266.26	4348.39	5187.91	26612.8	1660.2	6024.36	7849.99	4267.52	11432.5	2.67895	1.42167	8.43943e-06	0.000615339	chrIV	8303955	8307356	plus
WBGene00019174	243	88	53	973	146	344	125.209	102.865	75.6214	571.353	212.064	445.769	255.48	101.232	409.729	4.04742	2.017	8.57454e-06	0.000620248	chrIII	3226343	3230643	plus
WBGene00022610	685	224	241	2895	360	475	352.957	261.838	343.863	1699.96	522.898	615.524	632.841	319.553	946.129	2.96079	1.56598	8.88026e-06	0.000639833	chrIV	3609215	3613074	minus
WBGene00013882	1042	421	472	5491	219	711	536.906	492.116	673.458	3224.35	318.096	921.342	1027.71	567.493	1487.93	2.62194	1.39063	9.41145e-06	0.000672808	chrIV	9088596	9092180	plus
WBGene00000296	223	91	79	441	476	250	114.904	106.372	112.719	258.958	691.388	323.96	268.05	111.332	424.769	3.81535	1.93182	9.52396e-06	0.000678202	chrII	257819	261063	plus
WBGene00003850	196	112	128	1772	42	264	100.992	130.919	182.633	1040.53	61.0048	342.102	309.697	138.181	481.213	3.48247	1.80011	9.97323e-06	0.00070471	chrV	13246869	13249520	minus
WBGene00009791	830	527	491	5848	240	788	427.67	616.022	700.568	3433.99	348.599	1021.12	1091.33	581.42	1601.24	2.75401	1.46153	1.03043e-05	0.000725305	chrV	11667473	11669372	plus
WBGene00003093	218	91	87	1238	205	138	112.328	106.372	124.133	726.962	297.761	178.826	257.73	114.278	401.183	3.5106	1.81172	1.07548e-05	0.000751235	chrIV	11621420	11623101	minus
WBGene00010660	404	273	229	2743	75	424	208.167	319.116	326.741	1610.71	108.937	549.436	520.518	284.675	756.361	2.65693	1.40976	1.08305e-05	0.000753643	chrIV	12887036	12890486	minus
WBGene00014955	1436	761	616	272	75	84	739.921	889.549	878.92	159.72	108.937	108.851	480.983	836.13	125.836	0.150498	-2.73218	1.09936e-05	0.000759219	chrV	16929143	16930039	plus
WBGene00011287	147	47	53	1149	24	146	75.744	54.9393	75.6214	674.701	34.8599	189.193	184.176	68.7682	299.584	4.35644	2.12315	1.21851e-05	0.000832091	chrV	12882018	12885946	minus
WBGene00003956	1880	903	1009	10547	356	1698	968.698	1055.54	1439.66	6193.27	517.088	2200.34	2062.43	1154.63	2970.23	2.57245	1.36314	1.27233e-05	0.000858208	chrIII	7758665	7761208	plus
WBGene00022645	84	59	66	1333	18	90	43.2823	68.9664	94.17	782.747	26.1449	116.626	188.656	68.8062	308.506	4.48369	2.16469	1.27233e-05	0.000858208	chrV	415714	417707	minus
WBGene00015035	299	162	167	1595	245	276	154.064	189.365	238.279	936.595	355.861	357.652	371.969	193.903	550.036	2.83666	1.50419	1.27617e-05	0.000858208	chrIV	3572467	3577625	plus
WBGene00010385	536	318	317	3436	150	577	276.182	371.717	452.301	2017.64	217.874	747.7	680.57	366.733	994.406	2.71152	1.4391	1.28021e-05	0.000858208	chrV	14901552	14909109	minus
WBGene00045362	1865	802	844	202	233	134	960.969	937.475	1204.23	118.616	338.431	173.643	622.228	1034.23	210.23	0.203273	-2.29851	1.42229e-05	0.000946257	chrV	18749551	18750663	minus
WBGene00020317	250	131	152	1912	97	221	128.816	153.129	216.876	1122.74	140.892	286.381	341.472	166.274	516.671	3.10735	1.63568	1.42706e-05	0.000946257	chrIII	6909169	6912427	minus
WBGene00016572	910	570	323	777	1682	1207	468.891	666.285	460.862	456.26	2443.1	1564.08	1009.91	532.013	1487.81	2.79657	1.48366	1.4356e-05	0.00094848	chrII	3014838	3016925	plus
WBGene00012289	2030	1234	1124	8305	1238	2256	1045.99	1442.45	1603.74	4876.75	1798.19	2923.41	2281.76	1364.06	3199.45	2.34554	1.22992	1.46064e-05	0.000961556	chrI	13418447	13423368	plus
WBGene00015704	1074	623	510	4998	473	894	553.395	728.238	727.677	2934.86	687.03	1158.48	1131.61	669.77	1593.46	2.37911	1.25042	1.47066e-05	0.000964678	chrI	4422033	4426177	plus
WBGene00006831	5908	3523	2898	22039	3215	4786	3044.19	4118.11	4134.92	12941.5	4669.77	6201.89	5851.72	3765.74	7937.71	2.10788	1.07579	1.60973e-05	0.00104751	chrII	6995009	7010579	plus
WBGene00021709	13903	4362	3521	1915	1898	1382	7163.73	5098.84	5023.83	1124.5	2756.84	1790.85	3826.43	5762.13	1890.73	0.32813	-1.60766	1.72052e-05	0.00110535	chrV	696524	699615	minus
WBGene00017236	131	75	33	1110	10	151	67.4997	87.6691	47.085	651.8	14.525	195.672	177.375	67.4179	287.332	4.26195	2.09152	1.72135e-05	0.00110535	chrIV	8678682	8679293	minus
WBGene00022060	2352	1061	1081	2150	3854	2138	1211.9	1240.23	1542.39	1262.5	5597.92	2770.51	2270.91	1331.51	3210.31	2.41103	1.26965	1.74734e-05	0.00111811	chrIV	3253263	3254540	minus
WBGene00020390	1984	1007	836	9073	451	1570	1022.29	1177.1	1192.82	5327.73	655.075	2034.47	1901.58	1130.74	2672.42	2.36344	1.24089	1.75914e-05	0.00112174	chrV	1870600	1871788	minus
WBGene00019495	249	112	126	1248	191	265	128.301	130.919	179.779	732.834	277.427	343.398	298.776	146.333	451.22	3.08351	1.62457	1.7943e-05	0.00114019	chrII	658676	659874	plus
WBGene00019828	167	101	85	1239	62	204	86.0493	118.061	121.28	727.55	90.0547	264.351	234.558	108.463	360.652	3.32511	1.7334	1.81146e-05	0.00114711	chrX	4003511	4007613	plus
WBGene00022391	186	141	126	1490	133	271	95.8393	164.818	179.779	874.939	193.182	351.173	309.955	146.812	473.098	3.22247	1.68817	1.86053e-05	0.00116608	chrI	912418	926880	minus
WBGene00008545	319	170	101	1450	263	269	164.37	198.717	144.109	851.45	382.006	348.581	348.205	169.065	527.346	3.11919	1.64117	1.88198e-05	0.0011755	chrII	11588398	11591961	minus
WBGene00021071	229	108	141	1434	204	295	117.996	126.244	201.181	842.055	296.309	382.273	327.676	148.474	506.879	3.41393	1.77144	1.91963e-05	0.00119089	chrV	1116328	1129353	plus
WBGene00077495	939	339	263	64	70	55	483.834	396.264	375.253	37.5813	101.675	71.2712	244.313	418.45	70.1757	0.167704	-2.57601	1.94617e-05	0.00120327	chrV	17380207	17381094	plus
WBGene00015619	1182	520	562	4930	618	811	609.043	607.839	801.872	2894.93	897.642	1050.93	1143.71	672.918	1614.5	2.39925	1.26258	1.95729e-05	0.00120607	chrIV	7658723	7664151	plus
WBGene00044701	71	78	63	1608	15	157	36.5838	91.1759	89.8896	944.229	21.7874	203.447	231.185	72.5497	389.821	5.37316	2.42577	2.03453e-05	0.00124014	chrX	2263168	2267464	minus
WBGene00006690	607	401	278	2639	504	478	312.766	468.737	396.655	1549.64	732.058	619.412	679.878	392.72	967.036	2.46241	1.30007	2.03968e-05	0.00124014	chrIII	11795696	11803140	plus
WBGene00020258	269	70	61	332	584	283	138.606	81.8245	87.0359	194.953	848.257	366.723	286.233	102.489	469.978	4.58564	2.19712	2.11162e-05	0.0012754	chrI	6203899	6206931	plus
WBGene00007868	60	54	65	1943	7	143	30.9159	63.1218	92.7432	1140.94	10.1675	185.305	253.866	62.2603	445.472	7.15499	2.83895	2.27765e-05	0.00135106	chrIV	12923501	12924354	minus
WBGene00000692	719	512	462	5429	313	966	370.476	598.488	659.19	3187.95	454.631	1251.78	1087.09	542.718	1631.45	3.00608	1.58788	2.31053e-05	0.00135964	chrIV	8848169	8849663	plus
WBGene00011866	417	172	193	2437	112	300	214.866	201.054	275.376	1431.02	162.679	388.752	445.625	230.432	660.818	2.86774	1.51991	2.41968e-05	0.00141478	chrI	10300599	10302936	minus
WBGene00010647	472	242	282	2353	330	616	243.205	282.879	402.363	1381.7	479.323	798.237	597.951	309.482	886.42	2.8642	1.51813	2.49671e-05	0.00145055	chrIV	10679311	10680455	minus
WBGene00020634	948	592	507	1224	1619	1124	488.471	692.001	723.397	718.741	2351.59	1456.52	1071.79	634.623	1508.95	2.37771	1.24957	2.61351e-05	0.00150252	chrX	16878075	16880453	minus
WBGene00044261	189	131	125	235	376	560	97.3851	153.129	178.352	137.994	546.138	725.67	306.445	142.955	469.934	3.28728	1.71689	2.72764e-05	0.00154311	chrI	13528695	13531433	minus
WBGene00020766	121	67	74	974	81	126	62.3471	78.3177	105.585	571.94	117.652	163.276	183.186	82.0831	284.289	3.46343	1.7922	2.73204e-05	0.00154311	chrX	2204043	2205056	minus
WBGene00006532	565	175	160	2152	249	447	291.125	204.561	228.291	1263.67	361.671	579.24	488.093	241.326	734.86	3.0451	1.60649	2.73948e-05	0.00154311	chrI	8993995	8998753	plus
WBGene00003759	130	115	93	1421	88	207	66.9844	134.426	132.694	834.421	127.82	268.239	260.764	111.368	410.16	3.68292	1.88085	2.74035e-05	0.00154311	chrIII	11388530	11393160	minus
WBGene00012648	1313	825	764	7054	627	1337	676.543	964.36	1090.09	4142.16	910.714	1732.54	1586.07	910.331	2261.8	2.4846	1.31301	2.79699e-05	0.00156829	chrIII	10629970	10633402	minus
WBGene00009593	217	78	78	1547	53	124	111.813	91.1759	111.292	908.409	76.9822	160.684	243.393	104.76	382.025	3.64667	1.86658	2.81751e-05	0.0015683	chrIII	9893067	9898338	plus
WBGene00002178	2720	1273	1320	12589	509	1955	1401.52	1488.04	1883.4	7392.35	739.32	2533.37	2573	1590.99	3555.01	2.23447	1.15993	2.81936e-05	0.0015683	chrIV	6957630	6963705	plus
WBGene00017351	132	51	71	1207	30	87	68.015	59.615	101.304	708.759	43.5749	112.738	182.334	76.3114	288.357	3.77869	1.91789	2.83254e-05	0.00157086	chrII	7113669	7115832	minus
WBGene00017647	141	92	85	216	392	258	72.6524	107.541	121.28	126.837	569.378	334.327	222.002	100.491	343.514	3.41836	1.7733	2.88774e-05	0.00158704	chrIII	6608351	6610339	plus
WBGene00001462	505	265	291	1988	385	635	260.209	309.764	415.204	1167.37	559.211	822.858	589.102	328.392	849.812	2.5878	1.37172	2.94441e-05	0.00161334	chrX	10604748	10605768	plus
WBGene00001476	599	379	359	4419	92	486	308.644	443.021	512.228	2594.87	133.63	629.778	770.361	421.298	1119.43	2.65709	1.40985	2.97661e-05	0.00162612	chrIV	10661837	10664384	plus
WBGene00007325	669	375	305	3608	148	554	344.712	438.346	435.18	2118.64	214.969	717.895	711.624	406.079	1017.17	2.50485	1.32473	3.01468e-05	0.00164201	chrX	11160915	11163620	plus
WBGene00011331	2667	1322	1297	12098	587	1988	1374.21	1545.31	1850.58	7104.03	852.615	2576.13	2550.48	1590.04	3510.93	2.20808	1.14279	3.06032e-05	0.00166192	chrII	10206655	10209331	plus
WBGene00007717	74	65	62	646	174	172	38.1296	75.9799	88.4627	379.336	252.734	222.884	176.254	67.5241	284.985	4.22049	2.07741	3.07729e-05	0.00166467	chrV	15053741	15056727	plus
WBGene00013080	470	397	256	3003	221	1098	242.175	464.062	365.265	1763.38	321.001	1422.83	763.12	357.167	1169.07	3.27318	1.71069	3.08357e-05	0.00166467	chrV	18573027	18579756	minus
WBGene00009100	108	94	73	1227	53	117	55.6486	109.879	104.158	720.503	76.9822	151.613	203.131	89.895	316.366	3.51929	1.81528	3.1048e-05	0.0016663	chrV	9556692	9561595	minus
WBGene00001729	446	178	146	465	679	596	229.808	208.068	208.315	273.051	986.244	772.321	446.301	215.397	677.205	3.14398	1.65259	3.18089e-05	0.00170215	chrIV	2126096	2128852	minus
WBGene00001457	94	53	39	683	65	142	48.4349	61.9528	55.6459	401.062	94.4122	184.009	140.92	55.3446	226.495	4.09245	2.03296	3.191e-05	0.00170258	chrIII	12910128	12914833	plus
WBGene00017041	138	77	61	1084	20	179	71.1066	90.0069	87.0359	636.532	29.0499	231.955	190.948	82.7165	299.179	3.61692	1.85476	3.20971e-05	0.00170758	chrIII	8155393	8155877	plus
WBGene00005898	133	81	69	240	362	212	68.5302	94.6826	98.4505	140.93	525.803	274.718	200.519	87.2211	313.817	3.59795	1.84717	3.50626e-05	0.00185457	chrV	560196	562957	plus
WBGene00014101	265	169	161	1424	209	272	136.545	197.548	229.718	836.183	303.571	352.468	342.672	187.937	497.408	2.64667	1.40418	3.57812e-05	0.00188712	chrI	14185631	14196283	minus
WBGene00017798	686	355	281	3129	310	511	353.472	414.967	400.936	1837.37	450.273	662.174	686.532	389.792	983.273	2.52256	1.33489	3.7555e-05	0.00196933	chrV	8539704	8545544	minus
WBGene00000902	2349	1095	1148	12037	324	1286	1210.36	1279.97	1637.99	7068.21	470.608	1666.45	2222.26	1376.1	3068.42	2.22979	1.15691	3.87327e-05	0.00202527	chrX	14888418	14894257	plus
WBGene00010250	487	228	117	1150	347	692	250.934	266.514	166.938	675.288	504.016	896.721	460.069	228.129	692.008	3.03341	1.60094	3.90226e-05	0.00202885	chrV	14057825	14066220	plus
WBGene00015097	106	62	34	293	225	190	54.6181	72.4731	48.5118	172.052	326.811	246.21	153.446	58.5343	248.358	4.24294	2.08506	3.9607e-05	0.00204183	chrIV	5493986	5495241	plus
WBGene00007932	574	385	349	3162	143	918	295.762	450.035	497.96	1856.75	207.707	1189.58	749.632	414.585	1084.68	2.6163	1.38753	4.14498e-05	0.00212485	chrV	13264532	13269849	plus
WBGene00009618	4388	1432	1168	1340	284	546	2260.98	1673.9	1666.52	786.858	412.509	707.529	1251.38	1867.13	635.632	0.340432	-1.55456	4.17488e-05	0.0021282	chrX	10273633	10278243	plus
WBGene00017806	219	69	79	1397	107	99	112.843	80.6556	112.719	820.328	155.417	128.288	235.042	102.072	368.011	3.60539	1.85016	4.17746e-05	0.0021282	chrIII	4820762	4822190	minus
WBGene00011852	107	43	32	766	37	132	55.1334	50.2636	45.6582	449.801	53.7423	171.051	137.608	50.3517	224.865	4.46588	2.15894	4.19423e-05	0.0021282	chrV	16848612	16850174	plus
WBGene00015632	1537	604	590	6503	517	875	791.962	706.029	841.823	3818.61	750.94	1133.86	1340.54	779.938	1901.14	2.43755	1.28543	4.3202e-05	0.00218409	chrI	5497781	5506518	plus
WBGene00012669	241	106	83	1134	131	260	124.179	123.906	118.426	665.893	190.277	336.918	259.933	122.17	397.696	3.25526	1.70277	4.46859e-05	0.00224054	chrV	19145697	19149118	minus
WBGene00020973	9301	3057	3027	3679	533	1063	4792.48	3573.39	4318.98	2160.33	774.18	1377.48	2832.81	4228.28	1437.33	0.339932	-1.55668	4.56362e-05	0.00228194	chrIV	4332712	4335365	minus
WBGene00013786	464	249	207	410	925	527	239.083	291.061	295.351	240.755	1343.56	682.908	515.453	275.165	755.74	2.7465	1.45759	4.58933e-05	0.00228854	chrIV	16924359	16927154	plus
WBGene00017052	125	164	113	3338	59	366	64.4081	191.703	161.23	1960.1	85.6972	474.277	489.569	139.114	840.024	6.03839	2.59416	4.64971e-05	0.00231188	chrIV	7231224	7232727	plus
WBGene00013215	725	189	197	948	1173	682	373.567	220.926	281.083	556.672	1703.78	883.763	669.965	291.859	1048.07	3.59102	1.84439	4.66574e-05	0.00231188	chrII	14292748	14295979	plus
WBGene00015753	454	382	365	6833	124	572	233.93	446.528	520.789	4012.39	180.109	741.22	1022.49	400.416	1644.57	4.10716	2.03814	4.67403e-05	0.00231188	chrIII	8108724	8111198	plus
WBGene00003957	35	68	58	1569	42	460	18.0343	79.4867	82.7555	921.328	61.0048	596.086	293.116	60.0921	526.14	8.75555	3.1302	4.70762e-05	0.00232221	chrIV	9160625	9165112	minus
WBGene00017295	146	52	77	854	45	222	75.2287	60.7839	109.865	501.475	65.3623	287.676	183.399	81.9592	284.838	3.47536	1.79716	4.82437e-05	0.00236704	chrX	1489714	1494351	minus
WBGene00045365	1096	495	431	182	43	104	564.73	578.616	614.959	106.872	62.4573	134.767	343.734	586.102	101.365	0.172949	-2.53159	4.85415e-05	0.00237529	chrX	5014009	5015244	plus
WBGene00001783	1713	1583	996	4260	1748	9131	882.649	1850.4	1421.11	2501.5	2538.96	11832.3	3504.49	1384.72	5624.26	4.06166	2.02207	4.92735e-05	0.00240468	chrII	15183733	15185309	minus
WBGene00007919	237	117	125	1469	42	280	122.118	136.764	178.352	862.607	61.0048	362.835	287.28	145.745	428.816	2.94224	1.55692	4.94882e-05	0.00240873	chrII	8707105	8708804	plus
WBGene00006453	521	330	290	3430	77	338	268.453	385.744	413.777	2014.12	111.842	437.994	605.322	355.991	854.652	2.40077	1.26349	5.11825e-05	0.00247802	chrIV	7590550	7605887	plus
WBGene00008486	54	69	43	721	69	313	27.8243	80.6556	61.3532	423.376	100.222	405.598	183.172	56.611	309.732	5.47123	2.45187	5.2029e-05	0.00251235	chrIV	10469743	10471870	plus
WBGene00013960	662	425	340	3586	115	624	341.105	496.792	485.118	2105.72	167.037	808.604	734.063	441.005	1027.12	2.32905	1.21974	5.2885e-05	0.00254029	chrI	8270389	8273476	plus
WBGene00022386	423	197	229	1346	309	582	217.957	230.278	326.741	790.381	448.821	754.179	461.393	258.325	664.46	2.57218	1.36299	5.34581e-05	0.00256109	chrI	882921	890210	plus
WBGene00020651	208	128	96	1427	60	203	107.175	149.622	136.975	837.945	87.1497	263.056	263.654	131.257	396.05	3.01736	1.59329	5.49313e-05	0.0026248	chrIV	266448	268370	plus
WBGene00009830	2219	1341	1105	9697	491	1983	1143.37	1567.52	1576.63	5694.15	713.175	2569.65	2210.75	1429.18	2992.32	2.09374	1.06608	5.81081e-05	0.00276217	chrV	11313382	11316862	minus
WBGene00021848	118	76	72	469	213	197	60.8013	88.838	102.731	275.4	309.381	255.28	182.072	84.1234	280.021	3.32869	1.73495	5.95389e-05	0.00281831	chrIII	2561701	2566582	plus
WBGene00016713	431	244	179	217	892	533	222.079	285.217	255.4	127.424	1295.63	690.683	479.405	254.232	704.577	2.77139	1.47061	6.01526e-05	0.00283725	chrII	3727775	3729837	minus
WBGene00006682	238	90	70	1181	132	180	122.633	105.203	99.8773	693.492	191.729	233.251	241.031	109.238	372.824	3.41296	1.77102	6.04795e-05	0.00284533	chrI	8808986	8811641	minus
WBGene00011433	567	347	290	2749	251	490	292.155	405.616	413.777	1614.23	364.576	634.962	620.886	370.516	871.257	2.35147	1.23356	6.10168e-05	0.00286325	chrI	13310885	13318693	minus
WBGene00012272	288	112	155	1560	172	263	148.396	130.919	221.157	916.043	249.829	340.806	334.525	166.824	502.226	3.01051	1.59001	6.30229e-05	0.0029423	chrIII	10969845	10981749	plus
WBGene00006772	4424	2092	1999	20006	662	2746	2279.53	2445.38	2852.21	11747.7	961.552	3558.38	3974.12	2525.71	5422.53	2.14693	1.10228	6.31885e-05	0.00294253	chrIII	8193777	8201138	minus
WBGene00014902	309	184	156	113	788	355	159.217	215.082	222.584	66.3544	1144.57	460.023	377.971	198.961	556.981	2.79945	1.48515	6.50761e-05	0.00302274	chrIII	12382434	12383643	minus
WBGene00008453	463	243	219	2569	73	407	238.568	284.048	312.473	1508.54	106.032	527.407	496.177	278.363	713.991	2.56497	1.35894	6.54221e-05	0.00303112	chrV	12585080	12587979	plus
WBGene00019484	438	180	152	954	401	578	225.686	210.406	216.876	560.196	582.451	748.995	424.102	217.656	630.547	2.89699	1.53455	6.65506e-05	0.00307561	chrII	4031170	4032651	minus
WBGene00004976	235	78	109	387	344	370	121.087	91.1759	155.523	227.249	499.658	479.461	262.359	122.595	402.123	3.28008	1.71373	6.76534e-05	0.0031187	chrIII	3438999	3444195	minus
WBGene00000169	117	48	40	1032	19	71	60.286	56.1082	57.0727	605.998	27.5974	92.0046	149.844	57.8223	241.867	4.18293	2.06451	6.80855e-05	0.00312919	chrII	7235793	7238308	minus
WBGene00012945	129	47	45	405	156	227	66.4692	54.9393	64.2068	237.819	226.589	294.156	157.363	61.8718	252.855	4.08675	2.03095	6.82229e-05	0.00312919	chrI	11623106	11626553	plus
WBGene00004793	701	331	311	2805	212	718	361.201	386.913	443.74	1647.12	307.929	930.413	679.552	397.285	961.819	2.42098	1.27559	6.85416e-05	0.00313595	chrV	12973245	12976688	minus
WBGene00016759	223	181	162	2506	65	256	114.904	211.575	231.145	1471.54	94.4122	331.735	409.219	185.874	632.563	3.40317	1.76688	6.88801e-05	0.00314238	chrIV	6213811	6216354	plus
WBGene00021325	1720	874	841	8952	230	940	886.256	1021.64	1199.95	5256.68	334.074	1218.09	1652.78	1035.95	2269.61	2.19085	1.13149	6.90255e-05	0.00314238	chrX	5255160	5256827	plus
WBGene00044144	106	65	58	998	8	122	54.6181	75.9799	82.7555	586.033	11.62	158.092	161.516	71.1178	251.915	3.54222	1.82465	6.93787e-05	0.00315062	chrX	12150012	12150971	plus
WBGene00020330	2641	1400	1294	12509	408	1772	1360.81	1636.49	1846.3	7345.37	592.618	2296.23	2512.97	1614.54	3411.41	2.11293	1.07925	7.05431e-05	0.00319526	chrX	6300104	6305182	plus
WBGene00011335	672	375	405	4390	153	618	346.258	438.346	577.861	2577.84	222.232	800.829	827.228	454.155	1200.3	2.64293	1.40214	7.07109e-05	0.00319526	chrII	10231249	10235954	plus
WBGene00010873	494	229	245	2667	84	406	254.541	267.683	349.57	1566.08	122.01	526.111	514.333	290.598	738.067	2.53982	1.34473	7.23035e-05	0.00325117	chrI	7183051	7185707	plus
WBGene00004776	552	365	339	891	1249	717	284.426	426.656	483.691	523.202	1814.17	929.117	743.543	398.258	1088.83	2.73398	1.451	7.36039e-05	0.00329346	chrX	16579672	16587389	plus
WBGene00016234	513	211	256	3000	187	168	264.331	246.642	365.265	1761.62	271.617	217.701	521.196	292.08	750.313	2.56886	1.36113	7.64832e-05	0.00340815	chrV	2582859	2585907	minus
WBGene00007367	4382	1433	1096	1592	284	449	2257.89	1675.06	1563.79	934.834	412.509	581.832	1237.65	1832.25	643.058	0.350966	-1.51059	7.65395e-05	0.00340815	chrV	15479526	15481659	minus
WBGene00010275	145	102	120	2290	23	154	74.7134	119.23	171.218	1344.7	33.4074	199.559	323.805	121.721	525.89	4.32047	2.11119	7.69847e-05	0.00341965	chrIV	9658036	9663924	plus
WBGene00006055	127	101	85	1222	39	114	65.4387	118.061	121.28	717.567	56.6473	147.726	204.453	101.593	307.313	3.02494	1.59691	7.76505e-05	0.00344087	chrX	2823282	2826819	minus
WBGene00014300	619	233	184	1951	324	568	318.949	272.359	262.535	1145.64	470.608	736.037	534.355	284.614	784.096	2.75494	1.46202	7.98436e-05	0.0035203	chrV	11789531	11800520	plus
WBGene00018134	2541	856	668	625	221	290	1309.29	1000.6	953.115	367.004	321.001	375.794	721.133	1087.67	354.6	0.326019	-1.61697	8.00199e-05	0.0035203	chrIII	6713528	6717966	plus
WBGene00016817	508	288	236	2547	115	492	261.755	336.649	336.729	1495.62	167.037	637.553	539.223	311.711	766.736	2.45976	1.29852	8.06193e-05	0.00353816	chrV	7588520	7590501	minus
WBGene00016237	3505	1922	1791	15414	796	2514	1806	2246.67	2555.43	9051.21	1156.19	3257.74	3345.54	2202.7	4488.38	2.03767	1.02692	8.09547e-05	0.00353891	chrII	6114392	6118237	minus
WBGene00011330	5466	3547	2548	19695	1521	6102	2816.44	4146.16	3635.53	11565	2209.25	7907.22	5379.94	3532.71	7227.17	2.04578	1.03265	8.10769e-05	0.00353891	chrV	13716836	13720389	plus
WBGene00012433	691	468	631	14544	193	951	356.048	547.055	900.322	8540.34	280.332	1232.34	1976.07	601.142	3351.01	5.5744	2.47882	8.32589e-05	0.00361071	chrIV	9254243	9256082	minus
WBGene00018772	595	284	220	1770	446	582	306.583	331.974	313.9	1039.36	647.813	754.179	565.634	317.485	813.783	2.56321	1.35795	8.5504e-05	0.00369931	chrI	134337	137332	plus
WBGene00022175	512	246	305	1908	609	639	263.816	287.555	435.18	1120.39	884.57	828.042	636.592	328.85	944.334	2.87163	1.52187	8.75435e-05	0.00376087	chrIII	2707668	2715114	minus
WBGene00006441	116	36	39	524	134	129	59.7707	42.0812	55.6459	307.697	194.634	167.163	137.832	52.4993	223.165	4.25082	2.08774	8.82153e-05	0.00378086	chrIV	15361562	15368228	plus
WBGene00000089	820	328	338	2967	367	642	422.517	383.406	482.265	1742.24	533.066	831.929	732.571	429.396	1035.75	2.4121	1.27029	8.87802e-05	0.00379618	chrI	13543021	13545179	minus
WBGene00001795	773	470	441	4771	113	505	398.3	549.393	629.227	2801.57	164.132	654.399	866.169	525.64	1206.7	2.29568	1.19892	9.00719e-05	0.00384244	chrIV	11248880	11259443	minus
WBGene00022389	1859	1119	1080	9990	574	1703	957.878	1308.02	1540.96	5866.2	833.732	2206.82	2118.94	1268.95	2968.92	2.33965	1.2263	9.24141e-05	0.00391498	chrI	873484	882716	minus
WBGene00001479	2563	1630	1553	18109	450	1918	1320.62	1905.34	2215.85	10633.7	653.623	2485.42	3202.43	1813.94	4590.93	2.53092	1.33966	9.52317e-05	0.00400652	chrV	13603283	13606691	minus
WBGene00001190	320	243	174	1027	463	425	164.885	284.048	248.266	603.062	672.505	550.732	420.583	232.4	608.766	2.61948	1.38928	9.60602e-05	0.00403211	chrIV	13989069	14012049	plus
WBGene00010350	1484	671	596	6692	264	928	764.653	784.346	850.384	3929.59	383.459	1202.54	1319.16	799.794	1838.53	2.29875	1.20085	9.75612e-05	0.00407641	chrIV	11783918	11792570	minus
WBGene00016308	11502	3667	2711	1516	1695	1207	5926.58	4286.43	3868.1	890.206	2461.98	1564.08	3166.23	4693.71	1638.75	0.349139	-1.51813	9.82533e-05	0.00409598	chrII	970652	972957	minus
WBGene00012429	343	260	214	3214	40	194	176.736	303.92	305.339	1887.28	58.0998	251.393	497.128	261.998	732.259	2.7949	1.4828	9.86429e-05	0.00410287	chrIV	9244495	9245507	minus
WBGene00009541	557	339	272	2861	161	464	287.003	396.264	388.095	1680	233.852	601.27	597.747	357.121	838.374	2.34759	1.23118	9.89271e-05	0.00410536	chrIV	9453631	9457484	minus
WBGene00009730	1858	958	879	5607	1334	1363	957.362	1119.83	1254.17	3292.47	1937.63	1766.23	1721.28	1110.45	2332.11	2.10014	1.07049	0.000102977	0.00426377	chrIII	13409820	13423436	plus
WBGene00009144	585	389	315	3339	140	432	301.43	454.71	449.448	1960.68	203.349	559.803	654.904	401.863	907.946	2.25934	1.1759	0.000103358	0.00426732	chrI	7670322	7672709	minus
WBGene00007174	2232	1392	1270	11120	611	2238	1150.07	1627.14	1812.06	6529.74	887.474	2900.09	2484.43	1529.76	3439.1	2.24814	1.16873	0.000103539	0.00426732	chrX	16030734	16034744	plus
WBGene00008997	392	222	249	2518	265	308	201.984	259.501	355.278	1478.59	384.911	399.119	513.23	272.254	754.206	2.77023	1.47	0.000103763	0.00426732	chrV	15512748	15519793	minus
WBGene00008477	161	241	153	4367	111	711	82.9577	281.71	218.303	2564.33	161.227	921.342	704.979	194.324	1215.63	6.25572	2.64518	0.000104139	0.0042732	chrI	12430019	12431464	minus
WBGene00013334	87	49	46	724	53	92	44.8281	57.2771	65.6336	425.138	76.9822	119.217	131.513	55.9129	207.112	3.7042	1.88916	0.000105696	0.00432739	chrIV	14783355	14784199	minus
WBGene00010185	1008	349	461	81	126	75	519.387	407.954	657.763	47.5638	183.014	97.188	318.812	528.368	109.255	0.206779	-2.27384	0.000106604	0.00435483	chrV	15769409	15770540	plus
WBGene00018282	1162	702	691	7205	294	913	598.738	820.583	985.931	4230.83	427.034	1183.1	1374.37	801.751	1946.99	2.42842	1.28002	0.000106913	0.00435771	chrX	8382652	8384891	minus
WBGene00011131	1664	718	534	397	121	172	857.401	839.286	761.921	233.121	175.752	222.884	515.061	819.536	210.586	0.256957	-1.9604	0.000107243	0.00436147	chrIV	11202748	11203486	plus
WBGene00022834	1025	289	281	1417	1054	1041	528.147	337.818	400.936	832.072	1530.93	1348.97	829.812	422.3	1237.32	2.92996	1.55088	0.000108468	0.00440149	chrI	4364907	4366996	minus
WBGene00021978	627	315	250	725	173	1520	323.071	368.21	356.705	425.725	251.282	1969.68	615.778	349.329	882.228	2.5255	1.33657	0.000115352	0.00461835	chrV	5081987	5084992	minus
WBGene00016246	155	62	60	840	115	125	79.8661	72.4731	85.6091	493.254	167.037	161.98	176.703	79.3161	274.09	3.45567	1.78897	0.000115461	0.00461835	chrII	6201544	6208187	minus
WBGene00007779	10052	4969	4091	14173	10661	8994	5179.44	5808.37	5837.11	8322.49	15485.1	11654.8	8714.54	5608.31	11820.8	2.10773	1.07569	0.000115778	0.00461835	chrIV	12706691	12712291	minus
WBGene00009904	37	67	64	2698	3	77	19.0648	78.3177	91.3164	1584.28	4.35749	99.7797	312.853	62.8996	562.807	8.9477	3.16152	0.00011976	0.00475069	chrII	8381452	8383687	plus
WBGene00021461	448	251	213	1291	451	481	230.839	293.399	303.912	758.084	655.075	623.299	477.435	276.05	678.82	2.45904	1.2981	0.000120491	0.00476265	chrI	2357885	2372966	plus
WBGene00000172	1234	800	748	8421	211	1002	635.837	935.137	1067.26	4944.87	306.476	1298.43	1531.34	879.411	2183.26	2.48264	1.31187	0.000121188	0.00477987	chrV	9737567	9744206	plus
WBGene00014210	192	129	135	1205	234	193	98.9309	150.791	192.62	707.585	339.884	250.097	289.985	147.447	432.522	2.9334	1.55257	0.000124665	0.0048959	chrII	9210316	9213041	plus
WBGene00006675	173	125	73	391	361	223	89.1408	146.115	104.158	229.598	524.351	288.972	230.389	113.138	347.64	3.07271	1.61951	0.000125337	0.00491178	chrX	16306392	16314881	plus
WBGene00006632	134	65	69	1099	20	109	69.0455	75.9799	98.4505	645.341	29.0499	141.247	176.519	81.1586	271.879	3.34997	1.74415	0.000126069	0.00492989	chrX	2820440	2822019	plus
WBGene00014009	13	63	105	15760	10	126	6.69844	73.642	149.816	9254.38	14.525	163.276	1610.39	76.7188	3144.06	40.9816	5.35691	0.000127388	0.00497086	chrIV	12014260	12015636	minus
WBGene00022131	559	332	306	1081	744	663	288.033	388.082	436.606	634.771	1080.66	859.142	614.548	370.907	858.19	2.31376	1.21024	0.00013297	0.0051557	chrI	2776372	2778721	minus
WBGene00014152	902	388	349	918	1078	1092	464.769	453.542	497.96	539.056	1565.79	1415.06	822.696	472.09	1173.3	2.48533	1.31344	0.000136357	0.0052647	chrII	11890928	11894640	minus
WBGene00002052	1093	648	677	6850	286	1100	563.185	757.461	965.956	4022.37	415.414	1425.42	1358.3	762.201	1954.4	2.56416	1.35848	0.000141089	0.00541314	chrX	4912270	4915956	minus
WBGene00021304	236	169	152	1768	81	206	121.603	197.548	216.876	1038.18	117.652	266.943	326.467	178.676	474.259	2.6543	1.40833	0.000141675	0.00541501	chrV	1895796	1906518	plus
WBGene00012664	324	96	109	835	322	304	166.946	112.216	155.523	490.318	467.703	393.935	297.774	144.895	450.652	3.1102	1.63701	0.000141934	0.00541501	chrV	19200984	19203580	minus
WBGene00001988	266	130	161	1307	211	265	137.06	151.96	229.718	767.48	306.476	343.398	322.682	172.913	472.451	2.73231	1.45012	0.000146557	0.00557618	chrII	13930451	13931923	minus
WBGene00003055	933	557	443	2864	531	1029	480.742	651.089	632.08	1681.76	771.275	1333.42	925.061	587.971	1262.15	2.14662	1.10207	0.000150214	0.00568287	chrIII	5474437	5478343	plus
WBGene00001624	50	48	52	902	38	119	25.7632	56.1082	74.1946	529.661	55.1948	154.205	149.188	52.022	246.354	4.73556	2.24354	0.000150293	0.00568287	chrIV	7503609	7506422	plus
WBGene00194921	184	95	115	1061	75	221	94.8088	111.048	164.084	623.027	108.937	286.381	231.381	123.313	339.448	2.75273	1.46086	0.000152511	0.00575106	chrV	7798060	7800583	plus
WBGene00021984	1013	610	675	6251	594	1245	521.963	713.042	963.102	3670.63	862.782	1613.32	1390.81	732.703	2048.91	2.79638	1.48356	0.000152725	0.00575106	chrII	2208117	2212868	plus
WBGene00017671	324	188	245	2802	214	563	166.946	219.757	349.57	1645.35	310.834	729.558	570.337	245.425	895.249	3.64776	1.86701	0.000154113	0.00577957	chrI	4906824	4911832	plus
WBGene00011499	143	52	59	326	246	192	73.6829	60.7839	84.1823	191.43	357.314	248.801	169.366	72.883	265.848	3.6476	1.86695	0.000157541	0.00589601	chrIII	9748850	9749584	plus
WBGene00018791	208	121	122	1201	49	272	107.175	141.439	174.072	705.236	71.1723	352.468	258.594	140.895	376.292	2.67072	1.41723	0.00016101	0.00596734	chrI	5014351	5016260	minus
WBGene00007693	1167	351	338	162	129	91	601.314	410.291	482.265	95.1276	187.372	117.921	315.715	497.957	133.474	0.268043	-1.89947	0.000161077	0.00596734	chrX	12229883	12233023	plus
WBGene00020051	1450	542	644	5872	316	953	747.134	633.555	918.871	3448.08	458.988	1234.94	1240.26	766.52	1714	2.23608	1.16097	0.000164472	0.0060808	chrIII	7575208	7579344	minus
WBGene00014077	141	69	56	1142	31	72	72.6524	80.6556	79.9018	670.591	45.0273	93.3005	173.688	77.7366	269.639	3.46863	1.79437	0.000165228	0.00609643	chrIV	11678417	11681982	minus
WBGene00001518	162	124	160	3102	40	374	83.4729	144.946	228.291	1821.52	58.0998	484.644	470.162	152.237	788.087	5.17672	2.37204	0.000166697	0.00612594	chrIII	6309326	6320819	plus
WBGene00008570	168	112	125	1861	28	148	86.5645	130.919	178.352	1092.79	40.6699	191.784	286.847	131.945	441.749	3.34797	1.74329	0.000167696	0.00615032	chrI	8196053	8208734	plus
WBGene00017193	1023	611	644	6986	192	977	527.116	714.211	918.871	4102.23	278.879	1266.04	1301.22	720.066	1882.38	2.61418	1.38636	0.000170064	0.00621226	chrV	9226071	9227469	plus
WBGene00001669	2188	1117	846	7369	952	1492	1127.4	1305.69	1207.09	4327.13	1382.78	1933.39	1880.58	1213.39	2547.77	2.09971	1.07019	0.000172757	0.00628553	chrIV	10403998	10408245	plus
WBGene00044169	314	137	201	2863	69	342	161.793	160.142	286.79	1681.17	100.222	443.177	472.217	202.909	741.524	3.65447	1.86966	0.000173255	0.00629116	chrII	9375800	9377150	minus
WBGene00018103	26899	8101	6340	4539	3367	2626	13860.1	9469.43	9046.03	2665.33	4890.55	3402.88	7222.39	10791.9	3652.92	0.338489	-1.56282	0.000173874	0.00629517	chrII	1761845	1762912	plus
WBGene00000006	843	432	475	4807	198	500	434.368	504.974	677.739	2822.7	287.594	647.92	895.883	539.027	1252.74	2.32408	1.21666	0.000174054	0.00629517	chrI	2571778	2576024	minus
WBGene00001613	349	200	225	2053	205	357	179.827	233.784	321.034	1205.54	297.761	462.615	450.093	244.882	655.304	2.676	1.42008	0.00017628	0.00636313	chrIII	7138621	7144770	minus
WBGene00022675	1112	596	579	5474	202	709	572.975	696.677	826.128	3214.37	293.404	918.751	1087.05	698.593	1475.51	2.11211	1.07869	0.000178843	0.00644293	chrIV	4489005	4506701	minus
WBGene00013586	128	75	45	508	92	247	65.9539	87.6691	64.2068	298.301	133.63	320.072	161.639	72.6099	250.668	3.45225	1.78754	0.000185653	0.006649	chrV	18940439	18946876	plus
WBGene00016769	317	251	266	4122	76	483	163.339	293.399	379.534	2420.47	110.39	625.891	665.503	278.757	1052.25	3.77479	1.9164	0.000186773	0.00666144	chrIV	8648652	8653664	minus
WBGene00000633	192	132	123	1344	42	204	98.9309	154.298	175.499	789.206	61.0048	264.351	257.215	142.909	371.521	2.5997	1.37835	0.000186801	0.00666144	chrI	6232779	6234282	plus
WBGene00020039	382	435	574	20907	113	613	196.831	508.481	818.994	12276.7	164.132	794.35	2459.92	508.102	4411.74	8.68279	3.11816	0.00018997	0.00675076	chrI	4149983	4150639	plus
WBGene00013081	4845	2105	2247	20950	681	2599	2496.46	2460.58	3206.06	12302	989.149	3367.89	4137.02	2721.03	5553.01	2.04077	1.02912	0.000190611	0.00676043	chrV	18582600	18582924	plus
WBGene00012307	297	196	220	2105	131	572	153.034	229.109	313.9	1236.07	190.277	741.22	477.268	232.014	722.523	3.11413	1.63883	0.000195889	0.00692079	chrIII	13734970	13736441	plus
WBGene00014307	5088	3025	3134	30472	1392	4978	2621.67	3535.99	4471.65	17893.4	2021.87	6450.69	6165.87	3543.1	8788.65	2.4805	1.31063	0.000197159	0.00695221	chrII	8784480	8785458	plus
WBGene00012139	6850	3454	2328	11375	6182	5661	3529.57	4037.45	3321.63	6679.48	8979.32	7335.75	5647.2	3629.55	7664.85	2.11179	1.07847	0.000199696	0.00701467	chrI	7486573	7490170	minus
WBGene00006954	85	240	194	10397	21	239	43.7975	280.541	276.803	6105.19	30.5024	309.706	1174.42	200.38	2148.47	10.7219	3.42249	0.000200461	0.00702803	chrV	15342068	15344555	minus
WBGene00022497	1011	1015	692	12209	405	1573	520.933	1186.46	987.358	7169.21	588.261	2038.36	2081.76	898.249	3265.28	3.63516	1.86202	0.000204217	0.0071324	chrIII	1214944	1215279	plus
WBGene00022155	740	338	366	2861	362	512	381.296	395.095	522.215	1680	525.803	663.47	694.647	432.869	956.424	2.2095	1.14372	0.000204739	0.00713702	chrI	1667503	1669776	plus
WBGene00014067	1284	954	1039	15366	323	1788	661.6	1115.15	1482.46	9023.02	469.156	2316.96	2511.39	1086.41	3936.38	3.62331	1.85731	0.000209802	0.00727195	chrII	7911272	7912064	plus
WBGene00001454	94	75	97	2159	10	148	48.4349	87.6691	138.401	1267.78	14.525	191.784	291.432	91.5018	491.363	5.36998	2.42492	0.000210469	0.00728126	chrX	4677315	4678102	minus
WBGene00077697	1024	456	500	5452	65	480	527.631	533.028	713.409	3201.45	94.4122	622.003	948.656	591.356	1305.96	2.20841	1.14301	0.00021421	0.00737402	chrV	9745216	9746251	plus
WBGene00194683	4706	2374	1579	1193	576	796	2424.84	2775.02	2252.95	700.538	836.637	1031.49	1670.24	2484.27	856.221	0.344657	-1.53676	0.000214524	0.00737402	chrIII	10195816	10196989	minus
WBGene00013978	110	75	72	228	313	148	56.6791	87.6691	102.731	133.883	454.631	191.784	171.23	82.3597	260.099	3.15809	1.65905	0.000214766	0.00737402	chrIII	9099552	9101181	minus
WBGene00015270	4208	1783	1526	532	844	621	2168.24	2084.19	2177.32	312.394	1225.91	804.717	1462.13	2143.25	781.006	0.364403	-1.45639	0.000215165	0.00737402	chrV	2501050	2502425	plus
WBGene00022312	3368	1125	838	722	498	437	1735.41	1315.04	1195.67	423.964	723.343	566.282	993.285	1415.37	571.196	0.403565	-1.30913	0.00021652	0.0074066	chrIV	1425481	1426886	minus
WBGene00001461	159	107	128	1233	204	259	81.9271	125.075	182.633	724.026	296.309	335.623	290.932	129.878	451.986	3.48008	1.79912	0.000219257	0.00748625	chrX	3012172	3018545	minus
WBGene00000244	889	414	335	3690	141	719	458.071	483.933	477.984	2166.79	204.802	931.709	787.216	473.329	1101.1	2.32629	1.21803	0.000224829	0.0076477	chrV	6762459	6765055	minus
WBGene00119203	267	105	105	1237	99	236	137.576	122.737	149.816	726.375	143.797	305.818	264.353	136.709	391.997	2.86737	1.51973	0.00022524	0.0076477	chrIII	4709213	4712492	plus
WBGene00006600	430	129	115	1753	111	312	221.564	150.791	164.084	1029.37	161.227	404.302	355.224	178.813	531.634	2.97313	1.57198	0.00022921	0.00774648	chrII	7549287	7551929	plus
WBGene00044107	603	277	311	3203	84	369	310.705	323.791	443.74	1880.82	122.01	478.165	593.206	359.412	827	2.30098	1.20225	0.000229419	0.00774648	chrIV	9651409	9652467	plus
WBGene00001616	96	59	91	1984	30	151	49.4654	68.9664	129.84	1165.02	43.5749	195.672	275.423	82.7574	468.089	5.65615	2.49982	0.000232042	0.00778269	chrV	8716473	8720871	plus
WBGene00007778	1455	724	452	1989	1533	1389	749.711	846.299	644.922	1167.95	2226.67	1799.92	1239.25	746.977	1731.52	2.31803	1.2129	0.000232192	0.00778269	chrIV	12712747	12714732	plus
WBGene00021566	2182	1139	758	208	400	337	1124.31	1331.4	1081.53	122.139	580.998	436.698	779.512	1179.08	379.945	0.322239	-1.6338	0.000235333	0.00787353	chrV	2556173	2557521	plus
WBGene00022271	184	131	128	1113	153	221	94.8088	153.129	182.633	653.562	222.232	286.381	265.457	143.523	387.391	2.69915	1.43251	0.000238022	0.0079348	chrI	1594658	1596177	minus
WBGene00000645	286	194	201	2230	84	358	147.366	226.771	286.79	1309.47	122.01	463.911	426.053	220.309	631.797	2.86778	1.51993	0.000238031	0.0079348	chrII	303924	305530	minus
WBGene00002141	970	740	596	5035	658	1147	499.807	865.002	850.384	2956.59	955.742	1486.33	1268.98	738.398	1799.55	2.43711	1.28517	0.000243901	0.0081157	chrI	2451910	2464639	minus
WBGene00045299	9016	4014	2631	1230	2054	1252	4645.63	4692.05	3753.96	722.265	2983.42	1622.39	3069.95	4363.88	1776.03	0.406984	-1.29696	0.000246566	0.00818949	chrIV	901110	902891	plus
WBGene00019285	3491	2390	2139	22645	833	3032	1798.79	2793.72	3051.96	13297.3	1209.93	3928.99	4346.78	2548.16	6145.41	2.4117	1.27005	0.000251041	0.00832011	chrII	328564	332515	minus
WBGene00021059	1592	822	737	6544	357	1142	820.302	960.853	1051.57	3842.68	518.541	1479.85	1445.63	944.24	1947.02	2.062	1.04405	0.0002533	0.00836757	chrX	5849069	5851936	plus
WBGene00017568	1235	644	645	4444	432	1087	636.352	752.785	920.298	2609.55	627.478	1408.58	1159.17	769.812	1548.53	2.01158	1.00833	0.00025442	0.00838945	chrX	8599888	8602220	plus
WBGene00021519	403	253	230	1702	129	506	207.652	295.737	328.168	999.426	187.372	655.695	445.675	277.186	614.164	2.21571	1.14777	0.000256152	0.00841621	chrIV	1560229	1561810	plus
WBGene00006693	609	271	245	2929	107	387	313.796	316.778	349.57	1719.93	155.417	501.49	559.497	326.715	792.279	2.42499	1.27798	0.000258057	0.00843338	chrV	13346265	13356088	plus
WBGene00001719	2777	1670	1579	13222	1212	1856	1430.89	1952.1	2252.95	7764.05	1760.42	2405.08	2927.58	1878.65	3976.52	2.11669	1.08181	0.000259912	0.00847887	chrV	7774497	7775740	plus
WBGene00012671	166	97	82	265	341	237	85.534	113.385	116.999	155.61	495.301	307.114	212.324	105.306	319.342	3.03251	1.60051	0.000260627	0.00848708	chrV	19136480	19139021	plus
WBGene00006531	255	167	214	3539	85	294	131.393	195.21	305.339	2078.13	123.462	380.977	535.751	210.647	860.855	4.08671	2.03094	0.000264207	0.00858837	chrI	8353404	8357822	plus
WBGene00018992	929	471	438	4535	96	613	478.681	550.562	624.946	2662.98	139.44	794.35	875.161	551.397	1198.92	2.17434	1.12058	0.000266122	0.00863529	chrIII	2850988	2855411	minus
WBGene00016132	93	128	94	1876	45	334	47.9196	149.622	134.121	1101.6	65.3623	432.811	321.906	110.554	533.258	4.8235	2.27008	0.000271857	0.00880575	chrX	5340289	5341977	plus
WBGene00011315	188	138	108	1320	42	180	96.8698	161.311	154.096	775.113	61.0048	233.251	246.941	137.426	356.456	2.59381	1.37507	0.000274921	0.00888928	chrX	10719486	10721990	minus
WBGene00007883	905	653	546	5816	172	903	466.315	763.306	779.043	3415.2	249.829	1170.14	1140.64	669.554	1611.72	2.40716	1.26733	0.000277204	0.00894729	chrIV	9510038	9510577	minus
WBGene00006085	90	52	64	539	46	185	46.3738	60.7839	91.3164	316.505	66.8148	239.73	136.921	66.158	207.683	3.1392	1.6504	0.000278359	0.00896875	chrV	15740508	15741932	minus
WBGene00004401	338	158	198	2172	42	284	174.16	184.69	282.51	1275.41	61.0048	368.019	390.966	213.786	568.146	2.65754	1.41009	0.000280349	0.00901698	chrIII	9592198	9595490	minus
WBGene00020855	2028	1308	1122	5651	1914	1984	1044.96	1528.95	1600.89	3318.31	2780.08	2570.95	2140.69	1391.6	2889.78	2.07659	1.05421	0.000281526	0.00903895	chrV	3727247	3731755	minus
WBGene00015672	115	57	34	123	286	156	59.2555	66.6285	48.5118	72.2265	415.414	202.151	144.031	58.1319	229.93	3.95532	1.98379	0.000290061	0.00924809	chrX	16763636	16766583	plus
WBGene00003485	1386	781	596	6147	290	868	714.157	912.928	850.384	3609.56	421.224	1124.79	1272.17	825.823	1718.52	2.08098	1.05727	0.000299005	0.00948368	chrX	16262222	16265614	minus
WBGene00018590	114	52	60	798	25	131	58.7402	60.7839	85.6091	468.591	36.3124	169.755	146.632	68.3777	224.886	3.28888	1.7176	0.000299854	0.00949417	chrX	2163376	2164063	plus
WBGene00021668	1968	641	440	324	268	186	1014.04	749.279	627.8	190.255	389.269	241.026	535.278	797.04	273.517	0.343166	-1.54302	0.000301958	0.00954426	chrI	240491	245414	plus
WBGene00045300	9260	4115	2722	1308	2182	1224	4771.35	4810.11	3883.8	768.067	3169.34	1586.11	3164.8	4488.42	1841.17	0.410205	-1.28558	0.00030415	0.00959697	chrIV	896958	898739	plus
WBGene00007802	183	131	97	1096	89	179	94.2935	153.129	138.401	643.579	129.272	231.955	231.772	128.608	334.935	2.60432	1.3809	0.000307456	0.0096846	chrIV	11878526	11883384	plus
WBGene00009326	231	142	128	1364	55	232	119.026	165.987	182.633	800.95	79.8872	300.635	274.853	155.882	393.824	2.52643	1.3371	0.000313715	0.00984786	chrV	10880818	10883292	plus
WBGene00045277	390	231	236	1646	171	464	200.953	270.021	336.729	966.543	248.377	601.27	437.315	269.234	605.396	2.24858	1.16902	0.000318319	0.00997528	chrV	7813717	7814926	minus
WBGene00017842	1687	945	950	8374	344	1234	869.252	1104.63	1355.48	4917.27	499.658	1599.07	1724.23	1109.79	2338.67	2.10731	1.0754	0.000320063	0.0100075	chrII	4775291	4781343	minus
WBGene00009547	312	184	178	1309	248	257	160.763	215.082	253.974	768.654	360.219	333.031	348.62	209.939	487.301	2.32115	1.21484	0.000325113	0.0101189	chrIV	11844424	11846327	plus
WBGene00000903	321	376	506	8667	539	2229	165.4	439.514	721.97	5089.32	782.895	2888.43	1681.26	442.295	2920.22	6.60242	2.72299	0.000330811	0.0102787	chrIII	811822	813758	plus
WBGene00003746	218	231	184	3048	73	398	112.328	270.021	262.535	1789.81	106.032	515.744	509.411	214.961	803.861	3.73957	1.90287	0.000331825	0.0102928	chrI	7800447	7801817	minus
WBGene00011077	78	59	60	710	24	111	40.1907	68.9664	85.6091	416.917	34.8599	143.838	131.73	64.922	198.538	3.0581	1.61264	0.000334848	0.0103689	chrX	9864011	9866500	plus
WBGene00018514	85	61	80	1548	36	67	43.7975	71.3042	114.145	908.997	52.2898	86.8213	212.892	76.4157	349.369	4.57195	2.19281	0.000336764	0.0104107	chrX	5791668	5797145	plus
WBGene00019261	661	497	431	4024	418	674	340.59	580.954	614.959	2362.92	607.143	873.396	896.661	512.168	1281.15	2.50143	1.32276	0.000339688	0.0104657	chrIII	2842036	2845189	plus
WBGene00019480	314	177	160	1907	41	222	161.793	206.899	228.291	1119.8	59.5523	287.676	344.003	198.994	489.011	2.45741	1.29714	0.000342475	0.0105338	chrV	8215543	8217749	minus
WBGene00013662	59	43	74	1759	45	238	30.4006	50.2636	105.585	1032.9	65.3623	308.41	265.486	62.0829	468.89	7.55264	2.91698	0.000343773	0.010556	chrIV	16142512	16147123	minus
WBGene00016596	30	110	94	4496	11	258	15.4579	128.581	134.121	2640.08	15.9774	334.327	544.758	92.7201	996.796	10.7506	3.42634	0.000345904	0.0106037	chrIV	7179227	7180402	plus
WBGene00000136	274	207	148	1915	41	177	141.183	241.967	211.169	1124.5	59.5523	229.364	334.623	198.106	471.139	2.37822	1.24988	0.000347547	0.0106362	chrX	4565276	4569534	plus
WBGene00006767	2361	997	831	7171	1070	1339	1216.54	1165.41	1185.69	4210.86	1554.17	1735.13	1844.63	1189.21	2500.05	2.10227	1.07195	0.000357086	0.0108736	chrIV	12773838	12787489	plus
WBGene00018783	182	112	144	341	508	624	93.7782	130.919	205.462	200.238	737.868	808.604	362.811	143.386	582.236	4.06061	2.0217	0.000358797	0.0109068	chrII	2220005	2223545	minus
WBGene00019593	60	71	41	675	47	178	30.9159	82.9934	58.4995	396.365	68.2673	230.66	144.617	57.4696	231.764	4.03281	2.01178	0.000359757	0.0109068	chrII	2287291	2290082	minus
WBGene00007344	73	32	67	2032	27	45	37.6143	37.4055	95.5968	1193.2	39.2174	58.3128	243.559	56.8722	430.245	7.56512	2.91936	0.000359965	0.0109068	chrX	12938627	12940641	minus
WBGene00004779	207	92	134	1148	213	244	106.66	107.541	191.194	674.114	309.381	316.185	284.179	135.131	433.227	3.20597	1.68076	0.000370091	0.0111726	chrIII	1723185	1733094	minus
WBGene00077772	8784	2903	2404	1268	1772	1571	4526.09	3393.38	3430.07	744.579	2573.82	2035.76	2783.95	3783.18	1784.72	0.471752	-1.0839	0.00037118	0.0111726	chrI	11824967	11825778	minus
WBGene00001705	613	484	471	5444	190	974	315.857	565.758	672.031	3196.76	275.974	1262.15	1048.09	517.882	1578.29	3.04759	1.60767	0.000373583	0.0112265	chrIV	2476699	2480217	plus
WBGene00008076	821	455	328	3849	127	534	423.033	531.859	467.996	2260.16	184.467	691.979	759.916	474.296	1045.54	2.20439	1.14038	0.000383399	0.011465	chrIV	10578647	10581765	plus
WBGene00001691	78	69	85	1909	27	54	40.1907	80.6556	121.28	1120.98	39.2174	69.9754	245.383	80.7086	410.057	5.08071	2.34503	0.000385533	0.01151	chrV	20609832	20613753	plus
WBGene00016848	4545	1713	1139	2279	261	500	2341.88	2002.36	1625.15	1338.24	379.101	647.92	1389.11	1989.8	788.422	0.396233	-1.33558	0.000389724	0.0115973	chrIV	7745977	7748213	minus
WBGene00003531	171	61	106	1695	55	143	88.1103	71.3042	151.243	995.316	79.8872	185.305	261.861	103.552	420.169	4.05755	2.02061	0.000391142	0.0116206	chrIV	10224032	10226293	plus
WBGene00012323	357	236	224	917	281	709	183.95	275.865	319.607	538.469	408.151	918.751	440.799	259.807	621.79	2.39327	1.25899	0.000393897	0.0116731	chrII	9158047	9159813	plus
WBGene00016033	3810	2159	2160	18732	758	2907	1963.16	2523.7	3081.93	10999.6	1100.99	3767.01	3906.06	2522.93	5289.19	2.09645	1.06795	0.000394539	0.0116731	chrX	8997424	8998854	plus
WBGene00021252	6610	2432	1641	2206	746	1082	3405.9	2842.82	2341.41	1295.38	1083.56	1402.1	2061.86	2863.38	1260.35	0.440161	-1.1839	0.000394822	0.0116731	chrIII	1653722	1657471	minus
WBGene00009218	7529	4486	4517	35542	3598	6429	3879.43	5243.78	6444.94	20870.5	5226.08	8330.96	8332.62	5189.38	11475.8	2.21141	1.14497	0.000397325	0.0117281	chrIV	12392091	12398682	minus
WBGene00012480	291	79	68	369	391	284	149.942	92.3448	97.0236	216.679	567.926	368.019	248.656	113.104	384.208	3.39696	1.76424	0.000398866	0.011737	chrI	12859489	12861283	plus
WBGene00008560	68	71	64	1093	19	107	35.038	82.9934	91.3164	641.817	27.5974	138.655	169.57	69.7826	269.357	3.85994	1.94858	0.000398908	0.011737	chrII	8804782	8806889	minus
WBGene00012958	5332	2001	1276	1189	990	655	2747.39	2339.01	1820.62	698.189	1437.97	848.775	1648.66	2302.34	994.978	0.432159	-1.21037	0.000416493	0.0121373	chrI	12085018	12087821	minus
WBGene00019072	3722	1220	805	439	592	380	1917.82	1426.08	1148.59	257.784	859.877	492.419	1017.09	1497.5	536.693	0.358394	-1.48038	0.000422079	0.0122223	chrIV	909415	913167	plus
WBGene00001612	412	224	295	4012	65	414	212.289	261.838	420.911	2355.87	94.4122	536.478	646.967	298.346	995.588	3.33702	1.73856	0.000430899	0.012458	chrIII	8584106	8588535	minus
WBGene00018951	1111	613	642	5865	181	843	572.459	716.549	916.017	3443.97	262.902	1092.39	1167.38	735.009	1599.75	2.17651	1.12202	0.000441208	0.0127359	chrIII	7313079	7315187	minus
WBGene00000084	138	50	67	809	36	143	71.1066	58.4461	95.5968	475.051	52.2898	185.305	156.299	75.0498	237.548	3.16521	1.6623	0.000451182	0.0129828	chrI	7602307	7608241	plus
WBGene00010632	335	181	146	1558	92	307	172.614	211.575	208.315	914.869	133.63	397.823	339.804	197.501	482.107	2.44103	1.28749	0.000453896	0.0130404	chrV	10346639	10350129	minus
WBGene00013760	193	58	36	97	440	151	99.4461	67.7974	51.3655	56.9591	639.098	195.672	185.056	72.8697	297.243	4.0791	2.02825	0.000454916	0.0130492	chrV	20206287	20207876	plus
WBGene00008963	225	231	169	1190	502	555	115.935	270.021	241.132	698.776	729.153	719.191	462.368	209.029	715.707	3.42395	1.77566	0.000457435	0.013101	chrII	14604070	14605564	minus
WBGene00019550	81	30	58	1106	35	75	41.7365	35.0676	82.7555	649.451	50.8373	97.188	159.506	53.1865	265.825	4.99799	2.32135	0.000466077	0.0133276	chrX	3282599	3285711	plus
WBGene00002259	797	336	335	4083	74	315	410.666	392.758	477.984	2397.57	107.485	408.19	699.108	427.136	971.08	2.27347	1.1849	0.000466926	0.0133311	chrV	13879536	13880200	plus
WBGene00000771	612	209	155	146	936	572	315.342	244.305	221.157	85.7322	1359.54	741.22	494.549	260.268	728.829	2.8003	1.48558	0.000469194	0.013375	chrII	6192804	6195175	plus
WBGene00010424	107	87	53	660	98	113	55.1334	101.696	75.6214	387.557	142.345	146.43	151.464	77.4836	225.444	2.90957	1.5408	0.000474222	0.0134973	chrX	12652517	12653452	minus
WBGene00011878	78	58	68	672	45	190	40.1907	67.7974	97.0236	394.603	65.3623	246.21	151.864	68.3373	235.392	3.44456	1.78432	0.000477876	0.0135696	chrII	12497146	12502814	minus
WBGene00011678	123	57	64	922	30	86	63.3776	66.6285	91.3164	541.405	43.5749	111.442	152.957	73.7742	232.141	3.14664	1.65381	0.000478248	0.0135696	chrII	9775076	9775824	minus
WBGene00011803	1481	1304	1196	12399	507	3371	763.107	1524.27	1706.47	7280.78	736.415	4368.28	2729.89	1331.29	4128.49	3.10113	1.63279	0.00047928	0.0135779	chrIII	10040090	10049690	minus
WBGene00006915	2123	1391	1556	19681	492	1977	1093.91	1625.97	2220.13	11556.8	714.628	2561.88	3295.56	1646.67	4944.44	3.00269	1.58626	0.000481114	0.0135966	chrII	11435147	11438400	minus
WBGene00013896	338	243	197	1746	82	374	174.16	284.048	281.083	1025.26	119.105	484.644	394.717	246.43	543.004	2.20348	1.13978	0.000484966	0.0136755	chrV	12808406	12810054	minus
WBGene00012564	2528	933	938	628	405	272	1302.59	1090.6	1338.36	368.766	588.261	352.468	840.174	1243.85	436.498	0.350925	-1.51076	0.000486886	0.0137037	chrV	18123949	18125217	plus
WBGene00013715	155	39	88	1711	35	195	79.8661	45.5879	125.56	1004.71	50.8373	252.689	259.875	83.6713	436.079	5.21181	2.38178	0.000487781	0.0137037	chrI	10319660	10321484	minus
WBGene00016328	340	226	159	1868	67	276	175.19	264.176	226.864	1096.9	97.3172	357.652	369.684	222.077	517.291	2.32933	1.21992	0.000488214	0.0137037	chrI	5196081	5199939	plus
WBGene00043054	80	75	39	468	121	139	41.2212	87.6691	55.6459	274.813	175.752	180.122	135.87	61.5121	210.229	3.41768	1.77302	0.000492176	0.0137938	chrII	12490140	12491751	plus
WBGene00000750	170	93	119	1413	41	176	87.595	108.71	169.791	829.724	59.5523	228.068	247.24	122.032	372.448	3.05205	1.60978	0.0004999	0.0139476	chrX	10999676	11001786	minus
WBGene00006752	2271	1414	1630	18050	608	2757	1170.17	1652.85	2325.71	10599.1	883.117	3572.63	3367.26	1716.25	5018.28	2.92399	1.54794	0.000501463	0.0139476	chrI	7422781	7454098	plus
WBGene00019411	167	104	122	1155	74	240	86.0493	121.568	174.072	678.224	107.485	311.002	246.4	127.23	365.57	2.87331	1.52271	0.000501478	0.0139476	chrII	5804697	5805455	minus
WBGene00011757	285	202	247	3609	102	375	146.851	236.122	352.424	2119.23	148.154	485.94	581.454	245.132	917.775	3.744	1.90458	0.00050326	0.013976	chrII	8520860	8523420	plus
WBGene00044734	5891	2774	2372	785	1350	959	3035.43	3242.59	3384.41	460.958	1960.87	1242.71	2221.16	3220.81	1221.51	0.379256	-1.39875	0.000513604	0.0142352	chrV	2392771	2394146	plus
WBGene00016114	424	325	346	3006	356	756	218.472	379.899	493.679	1765.14	517.088	979.655	725.656	364.017	1087.3	2.98694	1.57867	0.000516173	0.0142498	chrII	5680971	5682651	plus
WBGene00015668	89	49	55	211	166	184	45.8586	57.2771	78.475	123.901	241.114	238.435	130.843	60.5369	201.15	3.32276	1.73238	0.000519277	0.0143122	chrX	7413566	7415475	minus
WBGene00017499	1064	422	270	2904	391	849	548.242	493.285	385.241	1705.25	567.926	1100.17	800.018	475.589	1124.45	2.36433	1.24143	0.00052251	0.0143796	chrV	2330428	2330929	plus
WBGene00020624	2962	965	653	675	306	317	1526.21	1128.01	931.712	396.365	444.463	410.781	806.258	1195.31	417.203	0.349033	-1.51857	0.000535893	0.0146713	chrV	3430666	3431443	minus
WBGene00007418	809	205	200	188	43	43	416.849	239.629	285.364	110.395	62.4573	55.7211	195.069	313.947	76.1911	0.242688	-2.04283	0.000536317	0.0146713	chrII	10352045	10353403	plus
WBGene00021116	566	244	171	1304	367	573	291.64	285.217	243.986	765.718	533.066	742.516	477.024	273.614	680.433	2.48683	1.31431	0.000539352	0.0147324	chrII	3525153	3528519	minus
WBGene00044131	3828	1421	1077	912	646	545	1972.43	1661.04	1536.68	535.533	938.312	706.233	1225.04	1723.38	726.692	0.421666	-1.24583	0.000542167	0.0147872	chrV	2530145	2531173	plus
WBGene00018912	2896	1483	977	338	591	518	1492.21	1733.51	1394	198.476	858.425	671.245	1057.98	1539.91	576.049	0.37408	-1.41858	0.000543806	0.0148087	chrV	2447894	2449242	plus
WBGene00014094	224	172	162	2173	32	160	115.419	201.054	231.145	1276	46.4798	207.334	346.239	182.539	509.938	2.79358	1.48211	0.000544576	0.0148087	chrIV	11943302	11945698	minus
WBGene00021799	159	159	171	1572	413	425	81.9271	185.859	243.986	923.09	599.88	550.732	430.912	170.591	691.234	4.05201	2.01864	0.000551898	0.0149634	chrIII	3233093	3241288	plus
WBGene00003889	121	65	100	858	255	217	62.3471	75.9799	142.682	503.824	370.386	281.197	239.403	93.6696	385.136	4.11164	2.03971	0.000556189	0.015013	chrIV	3550884	3557427	minus
WBGene00008277	597	386	426	4794	291	460	307.613	451.204	607.825	2815.07	422.676	596.086	866.746	455.547	1277.94	2.8053	1.48815	0.000558389	0.015041	chrIV	8993071	9000758	plus
WBGene00045301	8076	3642	2297	1097	1981	1189	4161.28	4257.21	3277.4	644.166	2877.39	1540.75	2793.03	3898.63	1687.44	0.432828	-1.20813	0.000559592	0.015041	chrIV	892806	894586	plus
WBGene00020917	209	21	64	2643	90	236	107.69	24.5473	91.3164	1551.99	130.725	305.818	368.681	74.518	662.844	8.89508	3.15301	0.000559693	0.015041	chrI	3293170	3294360	minus
WBGene00006669	239	146	151	1165	190	158	123.148	170.663	215.45	684.096	275.974	204.743	279.012	169.753	388.271	2.28726	1.19362	0.000561717	0.0150557	chrV	12387020	12395687	minus
WBGene00006980	303	201	247	1937	182	782	156.125	234.953	352.424	1137.42	264.354	1013.35	526.437	247.834	805.04	3.2483	1.69969	0.000563106	0.0150557	chrX	7930690	7931760	plus
WBGene00009375	1110	732	704	4697	626	1399	571.944	855.65	1004.48	2758.11	909.262	1812.88	1318.72	810.692	1826.75	2.25332	1.17206	0.000563999	0.0150557	chrIII	3747542	3759394	minus
WBGene00011439	611	378	239	2831	102	465	314.827	441.852	341.01	1662.38	148.154	602.566	585.132	365.896	804.368	2.19835	1.13642	0.000565257	0.0150579	chrV	11761873	11763049	minus
WBGene00004921	376	174	265	4157	43	314	193.74	203.392	378.107	2441.02	62.4573	406.894	614.268	258.413	970.124	3.75416	1.90849	0.000570049	0.0151476	chrII	6810920	6816411	plus
WBGene00013030	12815	5390	4737	1877	3246	1662	6603.12	6300.49	6758.84	1102.19	4714.8	2153.69	4605.52	6554.15	2656.89	0.405375	-1.30267	0.000570279	0.0151476	chrIII	12378888	12380511	minus
WBGene00020069	148	124	149	2311	115	219	76.2592	144.946	212.596	1357.04	167.037	283.789	373.61	144.6	602.621	4.16749	2.05918	0.000577989	0.0152646	chrIV	6846083	6859340	minus
WBGene00012273	121	114	80	606	182	227	62.3471	133.257	114.145	355.848	264.354	294.156	204.018	103.25	304.786	2.95192	1.56166	0.000579109	0.0152713	chrIII	10988034	10991820	plus
WBGene00017503	1660	528	445	625	45	218	855.34	617.191	634.934	367.004	65.3623	282.493	470.387	702.488	238.287	0.339204	-1.55978	0.000588966	0.0154399	chrV	1610335	1612747	plus
WBGene00011836	916	487	521	3432	370	848	471.983	569.265	743.372	2015.29	537.423	1098.87	906.035	594.873	1217.2	2.04614	1.03291	0.000589721	0.0154399	chrV	11248128	11250848	plus
WBGene00001133	109	51	68	649	54	131	56.1639	59.615	97.0236	381.097	78.4347	169.755	140.348	70.9342	209.762	2.95714	1.5642	0.000592997	0.0154814	chrII	14166807	14171573	minus
WBGene00010344	79	52	43	649	20	96	40.7059	60.7839	61.3532	381.097	29.0499	124.401	116.232	54.281	178.183	3.2826	1.71484	0.000597845	0.0155635	chrX	10546000	10548900	plus
WBGene00011551	75	59	59	582	22	138	38.6449	68.9664	84.1823	341.755	31.9549	178.826	124.055	63.9312	184.178	2.88089	1.52651	0.000601645	0.0156402	chrI	12722034	12722873	minus
WBGene00013481	579	188	177	1374	477	364	298.338	219.757	252.547	806.823	692.84	471.686	456.998	256.881	657.116	2.55806	1.35505	0.000611183	0.0158431	chrV	18656071	18664090	minus
WBGene00016152	464	225	195	1372	363	365	239.083	263.007	278.23	805.648	527.256	472.982	431.034	260.107	601.962	2.31429	1.21057	0.000614919	0.0159175	chrII	5056220	5060704	minus
WBGene00044623	5550	4122	4404	55122	1470	6912	2859.72	4818.29	6283.71	32368	2135.17	8956.85	9570.29	4653.91	14486.7	3.1128	1.63821	0.000619234	0.0160065	chrX	5492944	5496252	plus
WBGene00018641	444	256	286	2650	172	382	228.778	299.244	408.07	1556.1	249.829	495.011	539.505	312.031	766.98	2.45803	1.2975	0.000620159	0.0160078	chrX	5875863	5881681	plus
WBGene00008958	161	94	35	243	412	185	82.9577	109.879	49.9386	142.691	598.428	239.73	203.937	80.925	326.95	4.04016	2.01441	0.000621325	0.0160153	chrX	12368384	12371353	minus
WBGene00019744	301	87	72	357	347	345	155.095	101.696	102.731	209.633	504.016	447.065	253.373	119.841	386.905	3.22849	1.69086	0.000628446	0.0161534	chrV	449742	450442	plus
WBGene00011949	90	58	89	1442	72	161	46.3738	67.7974	126.987	846.753	104.58	208.63	233.52	80.386	386.654	4.80997	2.26603	0.000631416	0.0162069	chrIV	12719937	12720871	plus
WBGene00003748	75	79	80	1322	22	151	38.6449	92.3448	114.145	776.288	31.9549	195.672	208.175	81.7117	334.638	4.09535	2.03399	0.00063569	0.0162938	chrIII	3933580	3935888	minus
WBGene00001119	1277	577	524	3210	751	1019	657.993	674.468	747.653	1884.93	1090.82	1320.46	1062.72	693.371	1432.07	2.06538	1.04641	0.000642829	0.0164337	chrIV	3396578	3399120	minus
WBGene00021872	699	543	426	2849	478	1054	360.17	634.724	607.825	1672.95	694.293	1365.82	889.297	534.24	1244.35	2.3292	1.21984	0.000651435	0.0166043	chrIV	2854344	2855454	plus
WBGene00010505	44	34	63	2227	6	44	22.6717	39.7433	89.8896	1307.71	8.71497	57.017	254.291	50.7682	457.814	9.01774	3.17277	0.000658295	0.0167558	chrX	13708652	13711895	minus
WBGene00022611	1312	1055	983	12110	342	1414	676.028	1233.21	1402.56	7111.08	496.753	1832.32	2125.33	1103.93	3146.72	2.85046	1.51119	0.000670327	0.0170384	chrX	5024389	5028107	plus
WBGene00019263	377	209	183	2042	55	254	194.255	244.305	261.108	1199.08	79.8872	329.143	384.629	233.222	536.036	2.29839	1.20062	0.000676329	0.0171423	chrIV	5725589	5729716	plus
WBGene00008558	287	103	104	1327	62	217	147.881	120.399	148.389	779.224	90.0547	281.197	261.191	138.89	383.492	2.76113	1.46526	0.000677086	0.0171423	chrII	8792857	8794107	minus
WBGene00006525	117	72	94	812	170	152	60.286	84.1623	134.121	476.812	246.924	196.968	199.879	92.8564	306.901	3.30512	1.7247	0.000677225	0.0171423	chrI	9020938	9025546	plus
WBGene00012387	563	308	263	2206	177	482	290.094	360.028	375.253	1295.38	257.092	624.595	533.74	341.792	725.688	2.12319	1.08623	0.000695328	0.0175037	chrI	13695685	13702942	minus
WBGene00044724	217	667	647	18207	225	2932	111.813	779.671	923.151	10691.3	326.811	3799.4	2772.02	604.878	4939.16	8.16555	3.02955	0.00069795	0.0175456	chrX	4101678	4102101	minus
WBGene00012404	860	417	356	317	1468	674	443.128	487.44	507.947	186.145	2132.26	873.396	771.72	479.505	1063.93	2.21882	1.14979	0.00070413	0.0176767	chrV	17594323	17598904	minus
WBGene00015227	190	93	74	944	45	199	97.9003	108.71	105.585	554.324	65.3623	257.872	198.292	104.065	292.519	2.81093	1.49105	0.000705335	0.0176827	chrV	8758798	8760494	minus
WBGene00013891	378	337	388	6873	99	481	194.77	393.927	553.605	4035.87	143.797	623.299	990.879	380.767	1600.99	4.20464	2.07198	0.000709132	0.0177051	chrI	10333541	10335730	minus
WBGene00006832	476	232	306	3965	65	251	245.266	271.19	436.606	2328.28	94.4122	325.256	616.834	317.687	915.981	2.88328	1.52771	0.00071501	0.0178275	chrII	8117144	8122852	plus
WBGene00003168	110	44	57	782	31	82	56.6791	51.4325	81.3286	459.196	45.0273	106.259	133.32	63.1468	203.494	3.22256	1.68821	0.000716167	0.0178321	chrX	16803295	16807052	minus
WBGene00021480	702	489	372	1927	693	635	361.716	571.603	530.776	1131.55	1006.58	822.858	737.513	488.032	986.995	2.0224	1.01607	0.000741133	0.01833	chrV	3733130	3739385	minus
WBGene00003232	179	113	138	1830	22	176	92.2324	132.088	196.901	1074.59	31.9549	228.068	292.639	140.407	444.871	3.16843	1.66377	0.000741171	0.01833	chrX	9968571	9974344	minus
WBGene00020654	366	192	142	1644	119	262	188.587	224.433	202.608	965.368	172.847	339.51	348.892	205.209	492.575	2.40035	1.26325	0.000743756	0.0183691	chrI	4409690	4419306	plus
WBGene00019868	678	434	496	5848	200	597	349.35	507.312	707.702	3433.99	290.499	773.616	1010.41	521.454	1499.37	2.87536	1.52374	0.000749655	0.0184154	chrX	2473756	2476006	minus
WBGene00019921	20703	7696	6282	4039	3937	4381	10667.5	8996.02	8963.27	2371.73	5718.47	5677.07	7065.68	9542.27	4589.09	0.480922	-1.05612	0.000770444	0.0188501	chrII	931191	932334	plus
WBGene00001695	208	119	144	686	295	336	107.175	139.102	205.462	402.824	428.486	435.402	286.408	150.58	422.237	2.80408	1.48753	0.000775718	0.0189286	chrV	9221867	9224326	plus
WBGene00007695	432	237	234	2063	40	407	222.594	277.034	333.875	1211.41	58.0998	527.407	438.403	277.835	598.972	2.15586	1.10826	0.000782213	0.0190363	chrX	12222851	12226008	plus
WBGene00009843	632	291	259	2787	76	438	325.647	340.156	369.546	1636.55	110.39	567.578	558.311	345.117	771.505	2.23549	1.16059	0.00078407	0.0190561	chrX	11451973	11454130	minus
WBGene00017180	136	49	32	281	154	202	70.076	57.2771	45.6582	165.005	223.684	261.76	137.243	57.6705	216.816	3.75957	1.91057	0.000788061	0.0191024	chrII	3262833	3264287	plus
WBGene00002126	234	215	203	2607	83	368	120.572	251.318	289.644	1530.85	120.557	476.869	464.968	220.511	709.425	3.21718	1.6858	0.000798707	0.0192838	chrV	7961298	7965809	minus
WBGene00013198	1902	734	487	3104	1348	1491	980.034	857.988	694.86	1822.69	1957.96	1932.1	1374.27	844.294	1904.25	2.25543	1.17341	0.000806613	0.0193752	chrI	14694159	14700338	plus
WBGene00004740	338	178	138	852	408	242	174.16	208.068	196.901	500.3	592.618	313.593	330.94	193.043	468.837	2.42867	1.28017	0.000808469	0.0193752	chrV	6633252	6639641	plus
WBGene00019518	328	239	206	1419	305	289	169.007	279.372	293.925	833.247	443.011	374.498	398.843	247.435	550.252	2.22383	1.15305	0.00080869	0.0193752	chrX	16558371	16562236	plus
WBGene00021039	396	171	96	520	467	397	204.045	199.886	136.975	305.348	678.315	514.448	339.836	180.302	499.37	2.76964	1.4697	0.000810092	0.0193797	chrI	3352465	3359435	plus
WBGene00010901	397	245	288	3199	113	400	204.56	286.386	410.924	1878.48	164.132	518.336	577.136	300.623	853.648	2.83959	1.50568	0.000831598	0.0197789	chrII	10647455	10648617	plus
WBGene00012383	384	502	665	17872	140	1085	197.862	586.799	948.834	10494.6	203.349	1405.99	2306.23	577.831	4034.63	6.98237	2.80372	0.000897434	0.0211376	chrIV	11065985	11067051	minus
WBGene00008483	782	301	246	247	31	44	402.937	351.845	350.997	145.04	45.0273	57.017	225.477	368.593	82.3615	0.223448	-2.16199	0.000931627	0.0218586	chrII	10440226	10442457	plus
WBGene00018899	535	340	328	2618	180	476	275.667	397.433	467.996	1537.31	261.449	616.82	592.779	380.365	805.192	2.11689	1.08195	0.000934088	0.0218883	chrIV	7491760	7493746	plus
WBGene00010592	174	68	100	1080	49	130	89.6561	79.4867	142.682	634.184	71.1723	168.459	197.607	103.942	291.272	2.80226	1.48659	0.000948663	0.0221477	chrV	9485741	9489009	plus
WBGene00003402	232	100	148	1819	59	176	119.541	116.892	211.169	1068.13	85.6972	228.068	304.916	149.201	460.632	3.08732	1.62636	0.000948788	0.0221477	chrII	5104109	5108892	plus
WBGene00018381	366	261	190	275	548	592	188.587	305.088	271.095	161.482	795.967	767.137	414.893	254.924	574.862	2.25504	1.17315	0.000952314	0.0221836	chrII	2347020	2350035	plus
WBGene00000176	193	119	133	1531	35	122	99.4461	139.102	189.767	899.014	50.8373	158.092	256.043	142.772	369.315	2.58675	1.37114	0.000952752	0.0221836	chrX	4702935	4704939	minus
WBGene00045411	120	98	88	717	48	218	61.8318	114.554	125.56	421.027	69.7198	282.493	179.198	100.649	257.747	2.56086	1.35663	0.000954378	0.0221932	chrV	19432416	19433129	minus
WBGene00019914	333	123	115	1488	59	236	171.583	143.777	164.084	873.764	85.6972	305.818	290.787	159.815	421.76	2.63905	1.40002	0.000959853	0.022264	chrIII	1002696	1006236	plus
WBGene00008040	361	265	217	2019	88	337	186.011	309.764	309.62	1185.57	127.82	436.698	425.914	268.465	583.363	2.17296	1.11966	0.000975431	0.0225112	chrIII	9330231	9330844	plus
WBGene00022064	105	42	48	46	286	127	54.1028	49.0947	68.4873	27.0115	415.414	164.572	129.78	57.2283	202.332	3.53553	1.82193	0.000979323	0.0225447	chrIV	3202355	3203858	plus
WBGene00022435	1431	656	541	2883	1025	1143	737.344	766.812	771.909	1692.92	1488.81	1481.15	1156.49	758.688	1554.29	2.04865	1.03468	0.000980581	0.0225447	chrV	163842	172211	minus
WBGene00007746	903	508	567	5734	95	684	465.284	593.812	809.006	3367.05	137.987	886.355	1043.25	622.701	1463.8	2.35072	1.2331	0.000987506	0.0226755	chrII	8350485	8354652	minus
WBGene00018581	268	166	187	1925	54	265	138.091	194.041	266.815	1130.37	78.4347	343.398	358.525	199.649	517.402	2.59156	1.37382	0.00102456	0.0234088	chrI	6594345	6596079	plus
WBGene00009579	401	167	164	1994	65	207	206.621	195.21	233.998	1170.89	94.4122	268.239	361.562	211.943	511.181	2.41188	1.27016	0.00103072	0.0235201	chrII	11142693	11150323	plus
WBGene00016862	42	97	84	1289	68	386	21.6411	113.385	119.853	756.91	98.7697	500.194	268.459	84.9597	451.958	5.31967	2.41134	0.00104181	0.0237437	chrV	5229989	5233872	minus
WBGene00006811	1546	926	996	8666	516	1385	796.6	1082.42	1421.11	5088.74	749.487	1794.74	1822.18	1100.04	2544.32	2.31293	1.20972	0.00104366	0.0237562	chrIII	4066692	4082770	plus
WBGene00013539	190	139	96	896	100	209	97.9003	162.48	136.975	526.138	145.25	270.831	223.262	132.452	314.073	2.37122	1.24563	0.00104987	0.023868	chrIV	15532465	15539907	minus
WBGene00007431	165	65	85	1075	18	104	85.0187	75.9799	121.28	631.248	26.1449	134.767	179.073	94.0927	264.053	2.80631	1.48867	0.00105246	0.0238971	chrV	10107764	10109873	plus
WBGene00017792	105	54	44	755	9	96	54.1028	63.1218	62.78	443.341	13.0725	124.401	126.803	60.0015	193.605	3.22666	1.69004	0.0010574	0.02395	chrV	7438303	7439914	plus
WBGene00001373	112	70	34	849	12	75	57.7097	81.8245	48.5118	498.539	17.4299	97.188	133.534	62.682	204.386	3.26067	1.70517	0.00106581	0.0240477	chrII	6156986	6160993	minus
WBGene00003762	1079	405	352	3695	346	546	555.971	473.413	502.24	2169.73	502.563	707.529	818.574	510.541	1126.61	2.20669	1.14189	0.00106698	0.0240477	chrV	11616265	11616869	plus
WBGene00020009	1455	1049	1083	7491	1191	2134	749.711	1226.2	1545.24	4398.77	1729.92	2765.32	2069.19	1173.72	2964.67	2.52588	1.33679	0.00109638	0.0246551	chrII	4068353	4072945	plus
WBGene00019958	224	192	156	1479	73	340	115.419	224.433	222.584	868.479	106.032	440.586	329.589	187.479	471.699	2.51601	1.33114	0.00109662	0.0246551	chrX	4822629	4824650	plus
WBGene00001517	115	58	80	953	15	108	59.2555	67.7974	114.145	559.608	21.7874	139.951	160.424	80.3995	240.449	2.99068	1.58047	0.00110035	0.0247021	chrX	6479601	6484773	minus
WBGene00017969	498	422	379	4598	154	493	256.602	493.285	540.764	2699.98	223.684	638.849	808.86	430.217	1187.5	2.76024	1.4648	0.00110141	0.0247021	chrII	7232812	7235880	plus
WBGene00015231	124	88	110	1581	58	96	63.8929	102.865	156.95	928.374	84.2447	124.401	243.455	107.903	379.007	3.51249	1.81249	0.00110834	0.0248272	chrI	10628732	10631662	plus
WBGene00022287	444	271	327	3790	54	465	228.778	316.778	466.57	2225.51	78.4347	602.566	653.107	337.375	968.838	2.8717	1.5219	0.00111075	0.0248506	chrV	1391163	1392056	minus
WBGene00003100	115	94	82	230	252	208	59.2555	109.879	116.999	135.058	366.029	269.535	176.126	95.3777	256.874	2.69323	1.42933	0.00111418	0.0248968	chrII	9733363	9737952	plus
WBGene00014728	479	199	152	632	423	584	246.812	232.615	216.876	371.115	614.405	756.771	406.432	232.101	580.764	2.5022	1.3232	0.00111842	0.0249612	chrIII	4043093	4047607	minus
WBGene00013574	1751	1000	1074	7544	706	1718	902.229	1168.92	1532.4	4429.89	1025.46	2226.25	1880.86	1201.18	2560.53	2.13168	1.09199	0.00112116	0.0249919	chrIII	13527337	13539851	plus
WBGene00011289	56	73	57	1096	6	86	28.8548	85.3313	81.3286	643.579	8.71497	111.442	159.875	65.1716	254.579	3.90628	1.9658	0.001132	0.0251851	chrIV	10687573	10688118	plus
WBGene00001753	1081	1103	1196	4704	1200	8630	557.001	1289.32	1706.47	2762.22	1742.99	11183.1	3206.85	1184.27	5229.44	4.41577	2.14266	0.00113396	0.0251851	chrII	10950290	10951546	plus
WBGene00009318	1057	694	660	4098	681	1097	544.635	811.231	941.7	2406.37	989.149	1421.54	1185.77	765.856	1605.69	2.09659	1.06805	0.00113756	0.0252345	chrI	11501615	11507120	plus
WBGene00008515	627	459	351	3352	111	554	323.071	536.535	500.813	1968.32	161.227	717.895	701.31	453.473	949.147	2.09306	1.06561	0.00114001	0.0252391	chrX	13402024	13406347	plus
WBGene00004933	746	403	452	2359	572	824	384.388	471.075	644.922	1385.22	830.827	1067.77	797.368	500.128	1094.61	2.18865	1.13004	0.00114053	0.0252391	chrIII	9496927	9500120	minus
WBGene00018646	159	106	137	722	87	674	81.9271	123.906	195.474	423.964	126.367	873.396	304.172	133.769	474.576	3.54773	1.82689	0.00114316	0.0252668	chrIV	4121335	4123062	minus
WBGene00010361	3420	1371	791	887	530	474	1762.21	1602.59	1128.61	520.853	769.822	614.228	1066.39	1497.8	634.968	0.423933	-1.23809	0.00116077	0.0255401	chrX	15055430	15056752	minus
WBGene00001189	1093	723	764	7290	286	1179	563.185	845.13	1090.09	4280.74	415.414	1527.8	1453.73	832.801	2074.65	2.49117	1.31682	0.00116538	0.0256033	chrIV	10478422	10481824	minus
WBGene00016951	556	293	277	1878	267	452	286.487	342.494	395.229	1102.77	387.816	585.72	516.753	341.403	692.104	2.02723	1.01951	0.0011821	0.0258725	chrIV	5709085	5714486	plus
WBGene00021703	296	87	67	219	449	258	152.518	101.696	95.5968	128.598	652.17	334.327	244.151	116.604	371.698	3.1877	1.67252	0.00118232	0.0258725	chrIII	2082809	2088262	plus
WBGene00011366	5213	1811	1505	1710	740	876	2686.08	2116.92	2147.36	1004.12	1074.85	1135.16	1694.08	2316.78	1071.38	0.462441	-1.11266	0.00118344	0.0258725	chrIII	9250959	9252988	plus
WBGene00015199	88	56	96	1773	76	139	45.3433	65.4596	136.975	1041.12	110.39	180.122	263.235	82.5925	443.877	5.3743	2.42608	0.00119369	0.0260067	chrII	3040943	3043409	minus
WBGene00020599	456	288	260	2471	85	256	234.961	336.649	370.973	1450.99	123.462	331.735	474.795	314.194	635.395	2.0223	1.016	0.00120266	0.026137	chrIII	2899326	2900394	minus
WBGene00021446	335	148	144	1799	86	119	172.614	173	205.462	1056.39	124.915	154.205	314.43	183.692	445.168	2.42345	1.27706	0.00120395	0.026137	chrIII	1855381	1858875	plus
WBGene00003173	135	82	115	1402	65	187	69.5608	95.8516	164.084	823.264	94.4122	242.322	248.249	109.832	386.666	3.52052	1.81579	0.00122096	0.0264434	chrV	9907608	9915063	minus
WBGene00020439	471	218	104	268	831	365	242.69	254.825	148.389	157.372	1207.02	472.982	413.88	215.301	612.459	2.84466	1.50826	0.00123613	0.0266773	chrIII	6233578	6239284	minus
WBGene00020884	237	224	248	4189	45	261	122.118	261.838	353.851	2459.81	65.3623	338.214	600.199	245.936	954.462	3.88094	1.95641	0.00123942	0.0267169	chrX	6588763	6596100	plus
WBGene00017781	340	151	164	1869	18	192	175.19	176.507	233.998	1097.49	26.1449	248.801	326.355	195.232	457.479	2.34326	1.22852	0.00125024	0.0268238	chrX	811172	813125	minus
WBGene00044686	104	68	105	1238	34	327	53.5876	79.4867	149.816	726.962	49.3848	423.74	247.163	94.2967	400.029	4.24224	2.08483	0.00125871	0.0269424	chrX	10087287	10087899	minus
WBGene00004045	637	257	216	1507	439	473	328.224	300.413	308.193	884.921	637.645	612.932	512.055	312.276	711.833	2.2795	1.18871	0.00126289	0.0269642	chrIII	365948	377557	plus
WBGene00015622	316	259	158	1878	58	384	162.824	302.751	225.437	1102.77	84.2447	497.603	395.939	230.337	561.541	2.43791	1.28564	0.0012651	0.0269642	chrX	6007168	6011275	minus
WBGene00005059	1158	680	480	237	216	119	596.677	794.867	684.873	139.168	313.739	154.205	447.255	692.139	202.371	0.292385	-1.77406	0.00126546	0.0269642	chrII	4534739	4537238	minus
WBGene00007598	156	341	320	3668	316	1671	80.3813	398.602	456.582	2153.88	458.988	2165.35	952.296	311.855	1592.74	5.1073	2.35256	0.00126563	0.0269642	chrI	7398821	7401020	minus
WBGene00001621	361	236	211	1845	65	302	186.011	275.865	301.059	1083.4	94.4122	391.344	388.681	254.312	523.051	2.05673	1.04035	0.0012686	0.0269866	chrIV	10130344	10133255	plus
WBGene00021710	122	38	44	53	303	113	62.8623	44.419	62.78	31.122	440.106	146.43	131.287	56.6871	205.886	3.63197	1.86075	0.00127148	0.0269872	chrV	710643	712922	minus
WBGene00022744	358	216	151	1891	81	191	184.465	252.487	215.45	1110.41	117.652	247.505	354.661	217.467	491.855	2.26175	1.17744	0.00127261	0.0269872	chrX	4163623	4169767	plus
WBGene00016448	588	207	261	2328	147	347	302.976	241.967	372.4	1367.02	213.517	449.656	491.256	305.781	676.73	2.21312	1.14608	0.00127731	0.0270555	chrIII	4872531	4874715	minus
WBGene00013292	56	52	58	912	9	70	28.8548	60.7839	82.7555	535.533	13.0725	90.7088	135.285	57.4647	213.105	3.70844	1.89081	0.00130434	0.0274796	chrIV	14482307	14486413	plus
WBGene00010575	177	94	94	1066	45	124	91.2019	109.879	134.121	625.963	65.3623	160.684	197.868	111.734	284.003	2.54178	1.34584	0.00131022	0.0275579	chrIII	9361443	9365275	plus
WBGene00013077	59	67	87	1849	37	104	30.4006	78.3177	124.133	1085.75	53.7423	134.767	251.185	77.6172	424.752	5.47239	2.45217	0.00131156	0.0275579	chrV	18555335	18556937	minus
WBGene00044316	37	76	98	3128	16	130	19.0648	88.838	139.828	1836.78	23.2399	168.459	379.369	82.577	676.161	8.18825	3.03355	0.00131781	0.0276575	chrII	6752310	6752908	minus
WBGene00044564	1029	356	405	3969	154	548	530.208	416.136	577.861	2330.62	223.684	710.12	798.106	508.068	1088.14	2.14173	1.09877	0.0013601	0.0283499	chrX	3424803	3427324	plus
WBGene00016218	117	143	153	2220	49	397	60.286	167.156	218.303	1303.6	71.1723	514.448	389.161	148.582	629.74	4.23834	2.0835	0.00140288	0.0291369	chrIII	124774	126532	plus
WBGene00006308	9891	3858	2860	3053	1785	1715	5096.49	4509.7	4080.7	1792.74	2592.7	2222.37	3382.45	4562.3	2202.6	0.482784	-1.05055	0.00141884	0.0293932	chrX	3267283	3270851	minus
WBGene00044502	193	88	107	260	271	294	99.4461	102.865	152.67	152.674	393.626	380.977	213.71	118.327	309.092	2.61219	1.38526	0.0014214	0.0293932	chrIV	6010283	6010870	minus
WBGene00009625	149	157	131	1683	31	278	76.7745	183.521	186.913	988.27	45.0273	360.244	306.791	149.069	464.513	3.11609	1.63974	0.0014272	0.0294466	chrX	10312663	10315945	minus
WBGene00008144	581	424	324	2420	139	698	299.369	495.623	462.289	1421.04	201.897	904.496	630.786	419.094	842.478	2.01024	1.00737	0.00143293	0.0295316	chrV	14689139	14691846	plus
WBGene00164972	649	250	187	140	25	71	334.407	292.23	266.815	82.209	36.3124	92.0046	183.996	297.817	70.1753	0.235632	-2.08539	0.0014426	0.0295995	chrX	10883461	10885000	plus
WBGene00016517	79	110	42	1181	151	171	40.7059	128.581	59.9264	693.492	219.327	221.589	227.27	76.4046	378.136	4.94912	2.30717	0.00144269	0.0295995	chrV	1509940	1511630	minus
WBGene00013173	450	545	573	10394	83	897	231.869	637.062	817.567	6103.43	120.557	1162.37	1512.14	562.166	2462.12	4.3797	2.13083	0.00145263	0.0297066	chrII	15145872	15151841	plus
WBGene00019972	346	122	108	482	377	346	178.282	142.608	154.096	283.034	547.591	448.361	292.329	158.329	426.328	2.69268	1.42904	0.00145887	0.0297977	chrV	1018338	1022912	minus
WBGene00001578	3908	1336	1052	1406	530	590	2013.66	1561.68	1501.01	825.613	769.822	764.546	1239.39	1692.12	786.66	0.464897	-1.10502	0.00146258	0.0298209	chrV	1427650	1432139	minus
WBGene00020560	699	640	683	9265	172	1126	360.17	748.11	974.517	5440.47	249.829	1459.12	1538.7	694.266	2383.14	3.43261	1.7793	0.00146677	0.029859	chrIII	614704	617444	minus
WBGene00006686	141	73	83	230	258	190	72.6524	85.3313	118.426	135.058	374.744	246.21	172.07	92.1365	252.004	2.73511	1.4516	0.00147235	0.0299394	chrV	15704937	15709520	plus
WBGene00017400	144	61	102	597	272	240	74.1982	71.3042	145.535	350.563	395.079	311.002	224.613	97.0126	352.214	3.6306	1.86021	0.00147435	0.0299468	chrX	8639337	8643220	minus
WBGene00044411	124	65	67	821	21	108	63.8929	75.9799	95.5968	482.097	30.5024	139.951	148.003	78.4899	217.517	2.77127	1.47055	0.00148232	0.0300754	chrIII	5823913	5828392	plus
WBGene00004346	234	231	230	2987	115	371	120.572	270.021	328.168	1753.99	167.037	480.757	520.09	239.587	800.594	3.34156	1.74052	0.00148437	0.0300835	chrII	6100033	6110095	plus
WBGene00007495	78	66	77	732	51	190	40.1907	77.1488	109.865	429.836	74.0772	246.21	162.888	75.7348	250.041	3.30153	1.72313	0.00148773	0.0301184	chrIV	8886513	8888589	plus
WBGene00000615	310	122	74	316	417	298	159.732	142.608	105.585	185.557	605.69	386.16	264.222	135.975	392.469	2.88633	1.52924	0.00149414	0.0302094	chrII	8567982	8569037	minus
WBGene00016659	54	95	91	1692	28	236	27.8243	111.048	129.84	993.554	40.6699	305.818	268.126	89.5708	446.681	4.9869	2.31814	0.00149553	0.0302094	chrX	6084704	6085153	plus
WBGene00020148	93	109	153	3768	30	164	47.9196	127.412	218.303	2212.6	43.5749	212.518	477.054	131.212	822.896	6.27151	2.64881	0.00151648	0.0305651	chrII	174402	175644	minus
WBGene00012540	2184	1849	2248	32853	613	3442	1125.34	2161.34	3207.49	19291.5	890.379	4460.28	5189.39	2164.72	8214.06	3.79451	1.92391	0.00154308	0.0309649	chrIV	14042568	14043755	minus
WBGene00019069	74	46	49	560	58	48	38.1296	53.7704	69.9141	328.836	84.2447	62.2003	106.183	53.938	158.427	2.9372	1.55444	0.00154802	0.0310299	chrIV	924936	939667	plus
WBGene00022868	7206	2490	1923	3084	749	1297	3713	2910.61	2743.77	1810.95	1087.92	1680.7	2324.49	3122.46	1526.52	0.488885	-1.03243	0.00155933	0.0312223	chrII	2320335	2321954	plus
WBGene00015103	64	85	60	1149	8	98	32.977	99.3583	85.6091	674.701	11.62	126.992	171.876	72.6481	271.104	3.73175	1.89985	0.00156706	0.0313429	chrIII	7110241	7111811	minus
WBGene00011478	66	81	64	146	356	225	34.0075	94.6826	91.3164	85.7322	517.088	291.564	185.732	73.3355	298.128	4.06526	2.02335	0.00158168	0.0315733	chrIII	13580749	13583517	plus
WBGene00005597	2081	651	526	555	333	266	1072.27	760.968	750.506	325.9	483.681	344.693	623.002	861.247	384.758	0.446745	-1.16248	0.00158203	0.0315733	chrV	3432256	3433655	plus
WBGene00017512	1377	403	342	495	91	165	709.52	471.075	487.972	290.668	132.177	213.814	384.204	556.189	212.219	0.38156	-1.39002	0.0015888	0.0316739	chrV	1615763	1617942	minus
WBGene00011217	91	63	78	1120	30	38	46.8891	73.642	111.292	657.672	43.5749	49.2419	163.719	77.2743	250.163	3.23734	1.69481	0.00159707	0.0318041	chrIII	9785882	9789555	minus
WBGene00016310	70	63	42	439	79	88	36.0685	73.642	59.9264	257.784	114.747	114.034	109.367	56.5457	162.188	2.86827	1.52018	0.00159992	0.0318262	chrII	6344276	6345490	plus
WBGene00004173	118	107	93	851	58	188	60.8013	125.075	132.694	499.713	84.2447	243.618	191.024	106.19	275.859	2.59778	1.37728	0.0016045	0.0318817	chrV	20278622	20279832	minus
WBGene00004256	582	478	576	6489	284	1198	299.884	558.744	821.847	3810.39	412.509	1552.42	1242.63	560.159	1925.1	3.43671	1.78103	0.00162544	0.032194	chrV	8494868	8502139	plus
WBGene00012822	142	66	54	223	256	151	73.1676	77.1488	77.0482	130.947	371.839	195.672	154.304	75.7882	232.819	3.07197	1.61917	0.0016278	0.0322057	chrV	19468354	19469525	plus
WBGene00019665	156	86	77	467	165	194	80.3813	100.527	109.865	274.226	239.662	251.393	176.009	96.9245	255.093	2.63188	1.39609	0.0016303	0.0322204	chrIV	649664	651792	plus
WBGene00003091	152	150	105	946	36	367	78.3203	175.338	149.816	555.498	52.2898	475.573	247.806	134.491	361.12	2.68508	1.42496	0.00166992	0.0328969	chrV	10280285	10281445	minus
WBGene00008215	1295	1030	1220	17497	287	1388	667.268	1203.99	1740.72	10274.4	416.866	1798.63	2683.64	1203.99	4163.28	3.4579	1.7899	0.00167662	0.0329933	chrX	13385991	13387481	minus
WBGene00010268	175	210	276	5911	95	356	90.1714	245.473	393.802	3470.98	137.987	461.319	799.956	243.149	1356.76	5.57997	2.48026	0.00168508	0.0331242	chrII	12938800	12943798	plus
WBGene00011587	1589	635	590	5935	224	815	818.756	742.265	841.823	3485.07	325.359	1056.11	1211.56	800.948	1622.18	2.02533	1.01815	0.00169322	0.0332485	chrV	12859364	12863816	plus
WBGene00019538	547	348	378	3071	303	479	281.85	406.785	539.337	1803.31	440.106	620.707	682.016	409.324	954.709	2.3324	1.22182	0.00170459	0.0334359	chrIV	1707296	1707774	plus
WBGene00023515	476	227	148	478	590	469	245.266	265.345	211.169	280.685	856.972	607.749	411.198	240.593	581.802	2.4182	1.27393	0.0017313	0.0338509	chrV	14465025	14468231	minus
WBGene00008922	1064	460	425	1984	413	1286	548.242	537.704	606.398	1165.02	599.88	1666.45	853.949	564.115	1143.78	2.02757	1.01975	0.00173347	0.0338573	chrV	10937614	10940256	minus
WBGene00009213	213	122	90	418	282	240	109.751	142.608	128.414	245.453	409.604	311.002	224.472	126.924	322.019	2.53709	1.34318	0.00173884	0.0338897	chrIV	12380080	12380833	plus
WBGene00017914	383	232	270	2489	102	409	197.346	271.19	385.241	1461.56	148.154	529.999	498.915	284.592	713.237	2.50617	1.32548	0.00174088	0.0338936	chrII	2748593	2751578	plus
WBGene00001955	879	571	542	1946	1193	859	452.918	667.454	773.336	1142.71	1732.83	1113.13	980.394	631.236	1329.55	2.10627	1.07469	0.00174384	0.0339151	chrIII	9622060	9626465	plus
WBGene00008500	355	213	210	1842	102	202	182.919	248.98	299.632	1081.64	148.154	261.76	370.513	243.844	497.183	2.03894	1.02782	0.00177628	0.0344362	chrII	14017891	14020871	minus
WBGene00018645	75	103	42	848	88	327	38.6449	120.399	59.9264	497.952	127.82	423.74	211.414	72.99	349.837	4.79294	2.26091	0.00178091	0.0344894	chrIV	4119454	4120391	minus
WBGene00004017	2029	1442	1461	12684	783	2290	1045.47	1685.58	2084.58	7448.13	1137.3	2967.47	2728.09	1605.21	3850.97	2.39904	1.26246	0.00178509	0.0345217	chrII	10134891	10139158	plus
WBGene00015055	1298	547	399	4692	187	724	668.814	639.4	569.3	2755.18	271.617	938.188	973.749	625.838	1321.66	2.11182	1.07849	0.00179295	0.0346125	chrV	9138928	9141375	minus
WBGene00010440	337	98	103	1225	130	184	173.644	114.554	146.962	719.329	188.824	238.435	263.625	145.054	382.196	2.63486	1.39773	0.0017952	0.0346196	chrIV	13250653	13252289	minus
WBGene00006526	269	119	86	1038	103	197	138.606	139.102	122.706	609.521	149.607	255.28	235.804	133.471	338.136	2.5334	1.34107	0.0018054	0.0347066	chrIII	9181472	9185571	plus
WBGene00010049	470	384	373	3114	379	535	242.175	448.866	532.203	1828.56	550.496	693.274	715.929	407.748	1024.11	2.51163	1.32862	0.00184803	0.0353774	chrII	11571737	11572962	plus
WBGene00015376	147	93	89	1128	16	66	75.744	108.71	126.987	662.37	23.2399	85.5254	180.429	103.813	257.045	2.47603	1.30803	0.00185155	0.0354078	chrX	6355549	6357745	plus
WBGene00020345	1297	618	523	445	123	171	668.299	722.393	746.226	261.307	178.657	221.589	466.412	712.306	220.518	0.309583	-1.6916	0.00186874	0.035662	chrI	6225098	6225966	plus
WBGene00019640	139	107	98	1035	15	127	71.6218	125.075	139.828	607.759	21.7874	164.572	188.441	112.175	264.706	2.35976	1.23864	0.00188145	0.0357742	chrII	3976276	3977807	plus
WBGene00022626	481	164	170	1942	101	257	247.842	191.703	242.559	1140.36	146.702	333.031	383.699	227.368	540.03	2.37513	1.24801	0.00188157	0.0357742	chrV	8056406	8057561	plus
WBGene00009700	319	242	214	1631	220	269	164.37	282.879	305.339	957.735	319.549	348.581	396.409	250.863	541.955	2.16037	1.11128	0.00188244	0.0357742	chrII	10880868	10882366	plus
WBGene00006583	737	404	488	5170	87	512	379.75	472.244	696.287	3035.86	126.367	663.47	895.663	516.094	1275.23	2.47093	1.30505	0.00188473	0.0357806	chrII	10466792	10468284	plus
WBGene00044526	12834	6043	3818	4146	1886	2983	6612.91	7063.79	5447.59	2434.56	2739.41	3865.49	4693.96	6374.77	3013.15	0.472669	-1.0811	0.0018932	0.0357828	chrV	3257583	3258238	plus
WBGene00007687	1083	762	846	9168	245	1151	558.032	890.718	1207.09	5383.51	355.861	1491.51	1647.79	885.279	2410.3	2.72264	1.44501	0.00189403	0.0357828	chrII	8978518	8982616	minus
WBGene00007401	222	117	94	1148	50	157	114.389	136.764	134.121	674.114	72.6248	203.447	222.576	128.425	316.728	2.46626	1.30233	0.00189431	0.0357828	chrIII	9681440	9682745	minus
WBGene00009865	366	170	121	636	413	305	188.587	198.717	172.645	373.464	599.88	395.231	321.421	186.65	456.192	2.44411	1.28931	0.00189463	0.0357828	chrI	14331073	14339827	plus
WBGene00016973	349	151	110	1598	44	212	179.827	176.507	156.95	938.357	63.9098	274.718	298.378	171.095	425.662	2.48787	1.31491	0.00194707	0.0366597	chrII	6528583	6531578	minus
WBGene00020157	87	70	75	760	17	146	44.8281	81.8245	107.011	446.277	24.6924	189.193	148.971	77.888	220.054	2.82526	1.49839	0.00195384	0.0367419	chrV	884882	889275	minus
WBGene00003075	628	420	434	4156	137	547	323.586	490.947	619.239	2440.43	198.992	708.824	797.004	477.924	1116.08	2.33527	1.22359	0.00195545	0.0367419	chrV	12252628	12255375	plus
WBGene00045336	79	52	87	1020	52	237	40.7059	60.7839	124.133	598.951	75.5297	307.114	201.203	75.2077	327.198	4.3506	2.12121	0.00196322	0.0368159	chrV	12724541	12725952	minus
WBGene00012640	1796	472	446	396	182	216	925.416	551.731	636.361	232.534	264.354	279.901	481.716	704.503	258.93	0.367536	-1.44404	0.00196505	0.0368159	chrIV	13455293	13456125	plus
WBGene00019428	158	145	165	2367	40	221	81.4119	169.494	235.425	1389.92	58.0998	286.381	370.122	162.11	578.133	3.5663	1.83443	0.00196542	0.0368159	chrII	6456507	6467610	minus
WBGene00016768	316	115	146	1098	123	265	162.824	134.426	208.315	644.753	178.657	343.398	278.729	168.522	388.936	2.30793	1.2066	0.00197727	0.0369622	chrIV	8645518	8648168	minus
WBGene00001172	2984	2155	2002	10640	2814	3757	1537.55	2519.03	2856.49	6247.88	4087.32	4868.47	3686.12	2304.36	5067.89	2.19927	1.13702	0.00198464	0.0370621	chrV	10169151	10173729	minus
WBGene00017666	762	310	309	2956	123	454	392.632	362.366	440.887	1735.78	178.657	588.311	616.439	398.628	834.251	2.0928	1.06544	0.00199993	0.0372338	chrX	1328864	1329942	minus
WBGene00018266	417	257	258	2150	83	326	214.866	300.413	368.119	1262.5	120.557	422.444	448.149	294.466	601.832	2.04381	1.03126	0.00200646	0.0373173	chrV	2262487	2264540	minus
WBGene00011624	1772	501	413	5098	984	834	913.05	585.63	589.276	2993.58	1429.26	1080.73	1265.25	695.985	1834.52	2.63586	1.39828	0.00202213	0.0375195	chrV	14026321	14027453	minus
WBGene00007806	124	194	280	8741	10	80	63.8929	226.771	399.509	5132.78	14.525	103.667	990.19	230.058	1750.32	7.6082	2.92755	0.00205647	0.0379389	chrV	15347830	15349127	minus
WBGene00011215	1037	305	274	343	73	105	534.33	356.521	390.948	201.412	106.032	136.063	287.551	427.266	147.836	0.346004	-1.53114	0.00206053	0.0379756	chrIII	3960238	3961819	plus
WBGene00012268	158	56	54	283	212	170	81.4119	65.4596	77.0482	166.18	307.929	220.293	153.054	74.6399	231.467	3.10112	1.63279	0.00207681	0.0381987	chrI	11649973	11651903	plus
WBGene00005531	275	152	126	874	113	345	141.698	177.676	179.779	513.219	164.132	447.065	270.595	166.384	374.805	2.25265	1.17162	0.00207916	0.0382035	chrIV	10959056	10961187	plus
WBGene00014029	215	84	53	198	343	202	110.782	98.1894	75.6214	116.267	498.206	261.76	193.471	94.8642	292.077	3.0789	1.62241	0.00208354	0.0382405	chrIII	8924176	8925258	plus
WBGene00021445	117	48	65	762	18	91	60.286	56.1082	92.7432	447.452	26.1449	117.921	133.443	69.7125	197.173	2.82837	1.49997	0.00208535	0.0382405	chrIII	1858904	1859698	plus
WBGene00021543	471	299	300	2238	148	448	242.69	349.508	428.045	1314.17	214.969	580.536	521.653	340.081	703.225	2.06782	1.04811	0.00209766	0.0382978	chrIV	7081501	7082257	plus
WBGene00014073	149	111	88	414	196	206	76.7745	129.75	125.56	243.104	284.689	266.943	187.803	110.695	264.912	2.39317	1.25892	0.00210534	0.0382989	chrIII	9868476	9871021	minus
WBGene00020567	151	97	71	696	69	168	77.805	113.385	101.304	408.696	100.222	217.701	169.852	97.4982	242.206	2.48422	1.31279	0.00210802	0.0382989	chrX	3931750	3937879	plus
WBGene00008559	487	245	340	3043	221	524	250.934	286.386	485.118	1786.87	321.001	679.02	634.888	340.813	928.964	2.72573	1.44664	0.00210946	0.0382989	chrII	8801035	8804827	plus
WBGene00017555	510	299	177	73	74	32	262.785	349.508	252.547	42.8661	107.485	41.4669	176.11	288.28	63.9392	0.221796	-2.1727	0.00215535	0.0389004	chrII	3399757	3402928	minus
WBGene00010109	152	135	114	1196	46	179	78.3203	157.804	162.657	702.3	66.8148	231.955	233.309	132.927	333.69	2.51032	1.32787	0.00215751	0.0389011	chrV	11383087	11384268	plus
WBGene00020887	93	99	96	1226	22	179	47.9196	115.723	136.975	719.916	31.9549	231.955	214.074	100.206	327.942	3.27269	1.71047	0.00216019	0.0389111	chrX	6597881	6598829	minus
WBGene00018803	97	72	110	1143	71	295	49.9807	84.1623	156.95	671.178	103.127	382.273	241.278	97.031	385.526	3.97322	1.99031	0.00216997	0.0390105	chrII	3816518	3818240	plus
WBGene00012247	4497	1811	1586	887	1194	599	2317.15	2116.92	2262.93	520.853	1734.28	776.208	1621.39	2232.33	1010.45	0.452642	-1.14356	0.002207	0.0395983	chrV	19739660	19741068	minus
WBGene00009157	740	292	176	3137	92	254	381.296	341.325	251.12	1842.07	133.63	329.143	546.43	324.58	768.281	2.367	1.24306	0.00221184	0.0396463	chrI	9757870	9760809	minus
WBGene00017320	120	83	71	856	37	77	61.8318	97.0205	101.304	502.649	53.7423	99.7797	152.721	86.7188	218.724	2.52222	1.33469	0.00221805	0.0397187	chrIII	8254904	8257548	plus
WBGene00003745	113	94	114	1280	32	238	58.2249	109.879	162.657	751.625	46.4798	308.41	239.546	110.254	368.838	3.34536	1.74216	0.00222496	0.0398035	chrX	8593143	8593920	plus
WBGene00001990	358	294	273	2612	85	481	184.465	343.663	389.521	1533.78	123.462	623.299	533.033	305.883	760.182	2.4852	1.31336	0.00223109	0.0398741	chrI	8683214	8687103	minus
WBGene00020579	463	373	347	3711	59	499	238.568	436.008	495.106	2179.13	85.6972	646.624	680.188	389.894	970.482	2.48909	1.31562	0.00224186	0.0400276	chrII	6631121	6637066	plus
WBGene00019998	230	137	143	1210	54	189	118.511	160.142	204.035	710.521	78.4347	244.914	252.76	160.896	344.623	2.1419	1.09889	0.00228006	0.0405348	chrII	7494415	7496130	plus
WBGene00018102	2970	1275	823	1159	475	367	1530.34	1490.37	1174.27	680.573	689.935	475.573	1006.84	1398.33	615.36	0.440069	-1.1842	0.00229225	0.0406313	chrII	1763378	1766600	plus
WBGene00022665	2325	1738	2076	25394	620	2707	1197.99	2031.59	2962.07	14911.5	900.547	3507.84	4251.93	2063.88	6439.97	3.12032	1.64169	0.00229764	0.0406313	chrX	7779569	7780556	plus
WBGene00022311	1438	709	527	268	261	241	740.951	828.765	751.933	157.372	379.101	312.297	528.403	773.883	282.923	0.365589	-1.4517	0.00229787	0.0406313	chrIV	1423122	1425061	minus
WBGene00006947	7027	5811	6209	73666	1747	8509	3620.77	6792.6	8859.11	43257.2	2537.51	11026.3	12682.2	6424.16	18940.3	2.9483	1.55988	0.00230532	0.040699	chrII	7531107	7533199	plus
WBGene00045210	96	63	60	787	14	62	49.4654	73.642	85.6091	462.132	20.3349	80.3421	128.588	69.5722	187.603	2.69652	1.4311	0.00230615	0.040699	chrX	7846140	7847410	minus
WBGene00003605	202	172	191	996	298	636	104.084	201.054	272.522	584.858	432.844	824.154	403.253	192.553	613.952	3.18848	1.67287	0.00232505	0.0409009	chrIII	3573572	3578759	plus
WBGene00005638	820	321	261	2658	264	440	422.517	375.224	372.4	1560.8	383.459	570.17	614.094	390.047	838.142	2.14882	1.10355	0.00232653	0.0409009	chrIV	5012541	5014596	plus
WBGene00011856	1480	1206	1127	10885	458	1782	762.592	1409.72	1608.02	6391.75	665.243	2309.19	2191.09	1260.11	3122.06	2.47761	1.30895	0.00234374	0.0410851	chrIV	9328722	9330840	minus
WBGene00019177	53	78	60	697	38	190	27.309	91.1759	85.6091	409.283	55.1948	246.21	152.464	68.0313	236.896	3.48216	1.79998	0.00235272	0.0412027	chrV	3815284	3816528	plus
WBGene00011716	136	73	80	64	275	233	70.076	85.3313	114.145	37.5813	399.436	301.931	168.083	89.8509	246.316	2.74139	1.45491	0.00237364	0.0414503	chrV	11491811	11492572	plus
WBGene00016677	76	36	57	715	14	71	39.1601	42.0812	81.3286	419.853	20.3349	92.0046	115.794	54.19	177.398	3.27362	1.71089	0.00239015	0.0416989	chrIII	5036635	5040366	plus
WBGene00018737	2733	2205	2577	34994	629	2708	1408.22	2577.47	3676.91	20548.7	913.619	3509.13	5439.01	2554.2	8323.83	3.25888	1.70438	0.00240348	0.0418595	chrX	2111772	2113078	minus
WBGene00002038	6123	4051	4112	30232	1746	7308	3154.97	4735.3	5867.08	17752.4	2536.06	9470	7252.64	4585.78	9919.5	2.1631	1.1131	0.00240396	0.0418595	chrIII	4029088	4036816	minus
WBGene00017858	83	78	80	1105	13	84	42.767	91.1759	114.145	648.864	18.8824	108.851	170.781	82.6961	258.866	3.13032	1.64631	0.0024066	0.0418595	chrI	5436801	5443029	minus
WBGene00006614	403	180	180	1565	152	239	207.652	210.406	256.827	918.979	220.779	309.706	354.058	224.962	483.155	2.14772	1.10281	0.00242255	0.0420237	chrIII	8535052	8542671	plus
WBGene00000497	5309	3234	3355	27803	1230	4216	2735.54	3780.29	4786.98	16326.1	1786.57	5463.26	5813.13	3767.6	7858.65	2.08585	1.06063	0.00244689	0.0424057	chrII	203459	211924	plus
WBGene00020657	73	84	77	825	63	141	37.6143	98.1894	109.865	484.446	91.5072	182.713	167.389	81.8896	252.889	3.08817	1.62675	0.00245831	0.0425277	chrX	16711608	16720593	plus
WBGene00010917	108	70	19	947	17	133	55.6486	81.8245	27.1095	556.085	24.6924	172.347	152.951	54.8609	251.041	4.57596	2.19408	0.00245857	0.0425277	chrII	8231263	8232721	plus
WBGene00000501	69	72	54	530	106	49	35.5533	84.1623	77.0482	311.22	153.964	63.4962	120.907	65.5879	176.227	2.68688	1.42593	0.00248028	0.0428223	chrIV	13209250	13214542	minus
WBGene00013085	205	69	82	91	393	186	105.629	80.6556	116.999	53.4358	570.831	241.026	194.763	101.095	288.431	2.85308	1.51252	0.00248887	0.0428897	chrII	9405474	9407055	minus
WBGene00010784	278	100	139	936	163	204	143.244	116.892	198.328	549.626	236.757	264.351	251.533	152.821	350.245	2.29186	1.19652	0.00249529	0.0429599	chrIII	9860643	9863215	plus
WBGene00021701	126	66	78	204	261	137	64.9234	77.1488	111.292	119.79	379.101	177.53	154.964	84.4547	225.474	2.66976	1.41671	0.00250018	0.0429617	chrIII	2111790	2112390	plus
WBGene00016594	158	173	210	2605	70	535	81.4119	202.223	299.632	1529.67	101.675	693.274	484.648	194.422	774.875	3.98552	1.99477	0.00250244	0.0429617	chrIV	7189179	7190319	plus
WBGene00001456	128	52	83	807	34	145	65.9539	60.7839	118.426	473.876	49.3848	187.897	159.387	81.7212	237.053	2.90075	1.53642	0.00250676	0.0429954	chrIV	7696923	7698357	minus
WBGene00022644	65	129	156	3299	45	333	33.4922	150.791	222.584	1937.2	65.3623	431.515	473.49	135.622	811.358	5.98248	2.58074	0.00251221	0.0430084	chrV	411780	414761	minus
WBGene00020929	285	103	104	1341	39	162	146.851	120.399	148.389	787.445	56.6473	209.926	244.943	138.546	351.339	2.5359	1.3425	0.00252586	0.0431211	chrIV	4005471	4007817	minus
WBGene00021439	262	156	172	1361	108	201	134.999	182.352	245.413	799.189	156.869	260.464	296.548	187.588	405.507	2.16169	1.11216	0.00253241	0.0431925	chrIII	2009289	2021579	minus
WBGene00004058	509	288	232	2635	62	196	262.27	336.649	331.022	1547.29	90.0547	253.985	470.212	309.98	630.443	2.03382	1.02419	0.00253746	0.0432383	chrII	6880657	6883710	minus
WBGene00018694	151	176	192	1639	128	622	77.805	205.73	273.949	962.432	185.919	806.012	418.641	185.828	651.455	3.50568	1.8097	0.00256092	0.0435975	chrV	8379486	8383568	plus
WBGene00021635	885	410	294	2241	388	677	456.01	479.258	419.485	1315.93	563.568	877.284	685.256	451.584	918.928	2.0349	1.02496	0.00258556	0.0438946	chrI	3533997	3539159	plus
WBGene00010594	393	271	341	4411	80	330	202.499	316.778	486.545	2590.17	116.2	427.627	689.97	335.274	1044.67	3.11586	1.63963	0.00260043	0.0441061	chrV	9501375	9504554	plus
WBGene00017580	233	111	105	1169	59	140	120.057	129.75	149.816	686.445	85.6972	181.418	225.53	133.208	317.853	2.38615	1.25468	0.00261348	0.0442865	chrX	9235049	9242216	minus
WBGene00010972	816	508	534	3914	248	840	420.456	593.812	761.921	2298.33	360.219	1088.51	920.54	592.063	1249.02	2.1096	1.07697	0.00262051	0.0443645	chrIII	10254761	10257136	plus
WBGene00018914	96	83	44	22	267	160	49.4654	97.0205	62.78	12.9186	387.816	207.334	136.223	69.7553	202.69	2.90572	1.5389	0.00264533	0.0447019	chrV	2440291	2446137	minus
WBGene00006363	3438	2205	2428	20216	1088	3632	1771.48	2577.47	3464.31	11871	1580.31	4706.49	4328.51	2604.42	6052.59	2.32397	1.21659	0.00267113	0.0450406	chrII	7585680	7594864	minus
WBGene00000727	297	168	176	885	250	269	153.034	196.379	251.12	519.678	363.124	348.581	305.319	200.178	410.461	2.05049	1.03597	0.00267276	0.0450406	chrV	11385342	11386363	plus
WBGene00020270	66	43	75	1271	13	125	34.0075	50.2636	107.011	746.34	18.8824	161.98	186.414	63.7608	309.068	4.8473	2.27718	0.00268148	0.0450944	chrV	6414976	6417412	plus
WBGene00021326	372	436	421	6098	130	602	191.679	509.65	600.69	3580.79	188.824	780.096	975.288	434.006	1516.57	3.49435	1.80502	0.00268479	0.0450944	chrX	5249819	5252749	plus
WBGene00004230	285	348	441	8378	61	584	146.851	406.785	629.227	4919.62	88.6022	756.771	1157.98	394.287	1921.66	4.87377	2.28504	0.0026858	0.0450944	chrV	1170130	1175673	plus
WBGene00021875	178	46	49	431	70	252	91.7172	53.7704	69.9141	253.086	101.675	326.552	149.452	71.8005	227.104	3.16299	1.66129	0.00269906	0.045234	chrIV	2799692	2800982	plus
WBGene00013456	711	388	469	3904	199	662	366.353	453.542	669.178	2292.46	289.047	857.846	821.404	496.358	1146.45	2.30973	1.20772	0.00270467	0.0452452	chrIV	14374102	14379616	plus
WBGene00010683	345	82	191	2992	47	361	177.766	95.8516	272.522	1756.92	68.2673	467.798	473.188	182.047	764.33	4.19854	2.06989	0.00270884	0.0452734	chrII	8754017	8755176	minus
WBGene00017794	108	63	89	1171	11	89	55.6486	73.642	126.987	687.62	15.9774	115.33	179.201	85.4258	272.976	3.19547	1.67603	0.00271716	0.0453711	chrX	4442136	4448126	minus
WBGene00013845	65	118	75	886	33	445	33.4922	137.933	107.011	520.265	47.9323	576.649	237.214	92.8121	381.616	4.1117	2.03973	0.00272718	0.0454747	chrIII	1285008	1287132	plus
WBGene00004924	655	469	608	6484	253	1080	337.499	548.224	867.506	3807.45	367.481	1399.51	1221.28	584.409	1858.15	3.17953	1.66881	0.00272833	0.0454747	chrI	6436045	6441193	plus
WBGene00016788	42	51	106	1324	74	1295	21.6411	59.615	151.243	777.462	107.485	1678.11	465.926	77.4996	854.353	11.024	3.46257	0.00273442	0.0454772	chrV	4040394	4041989	minus
WBGene00007800	2861	2235	1823	13788	956	3456	1474.17	2612.54	2601.09	8096.41	1388.59	4478.42	3441.87	2229.27	4654.47	2.08789	1.06205	0.00274347	0.0455335	chrV	10847173	10852548	plus
WBGene00001608	257	159	183	1481	112	250	132.423	185.859	261.108	869.654	162.679	323.96	322.614	193.13	452.098	2.3409	1.22706	0.00275416	0.0456558	chrX	9870750	9872567	minus
WBGene00000780	339	319	315	1650	693	777	174.675	372.886	449.448	968.892	1006.58	1006.87	663.224	332.336	994.113	2.99129	1.58077	0.00275983	0.0457083	chrI	10924231	10925746	minus
WBGene00004301	43	39	59	1015	14	92	22.1564	45.5879	84.1823	596.015	20.3349	119.217	147.916	50.6422	245.189	4.8416	2.27548	0.00278072	0.0458699	chrX	14550068	14556230	plus
WBGene00016733	1240	1045	1166	11384	929	1708	638.929	1221.52	1663.67	6684.77	1349.37	2213.29	2295.26	1174.71	3415.81	2.9078	1.53993	0.00278274	0.0458699	chrI	5046399	5048021	minus
WBGene00016066	186	306	316	2961	319	1021	95.8393	357.69	450.875	1738.72	463.346	1323.05	738.254	301.468	1175.04	3.89773	1.96263	0.00278699	0.0458699	chrI	4094612	4098331	plus
WBGene00019236	238	335	388	6970	94	604	122.633	391.589	553.605	4092.83	136.535	782.687	1013.31	355.942	1670.69	4.6937	2.23072	0.00278713	0.0458699	chrV	4911750	4912369	minus
WBGene00015729	178	108	86	409	196	235	91.7172	126.244	122.706	240.168	284.689	304.522	195.008	113.556	276.46	2.43457	1.28367	0.00279686	0.0459473	chrII	1357184	1358014	minus
WBGene00012763	360	314	368	4307	128	620	185.495	367.041	525.069	2529.1	185.919	803.421	766.008	359.202	1172.81	3.26505	1.70711	0.00284039	0.0465208	chrIV	14981577	14996284	plus
WBGene00011428	81	61	40	469	35	115	41.7365	71.3042	57.0727	275.4	50.8373	149.022	107.562	56.7045	158.42	2.79378	1.48222	0.00285634	0.0466731	chrV	11064936	11065616	minus
WBGene00002177	464	269	313	2902	74	388	239.083	314.44	446.594	1704.08	107.485	502.786	552.41	333.372	771.449	2.31407	1.21044	0.00287103	0.0467495	chrX	5368434	5372027	plus
WBGene00009432	82	57	64	615	12	100	42.2517	66.6285	91.3164	361.132	17.4299	129.584	118.057	66.7322	169.382	2.53824	1.34383	0.00287268	0.0467495	chrV	13749172	13751908	minus
WBGene00022633	150	166	223	3164	82	514	77.2897	194.041	318.18	1857.92	119.105	666.062	538.767	196.504	881.03	4.48353	2.16463	0.00288857	0.0468869	chrI	6651219	6655430	plus
WBGene00013159	213	68	43	343	281	140	109.751	79.4867	61.3532	201.412	408.151	181.418	173.595	83.5304	263.66	3.15646	1.65831	0.00288992	0.0468869	chrII	15019147	15025692	plus
WBGene00022106	42	46	65	963	76	83	21.6411	53.7704	92.7432	565.48	110.39	107.555	158.597	56.0516	261.142	4.65895	2.22001	0.0029006	0.0470185	chrIII	1125233	1136015	minus
WBGene00011608	413	121	118	771	330	307	212.804	141.439	168.365	452.737	479.323	397.823	308.749	174.203	443.294	2.5447	1.3475	0.00290457	0.0470413	chrX	173180	177000	plus
WBGene00017892	2020	1424	1365	10190	467	2502	1040.84	1664.54	1947.61	5983.64	678.315	3242.19	2426.19	1551	3301.38	2.12856	1.08988	0.00291271	0.0470481	chrX	3227477	3235396	minus
WBGene00018639	993	379	366	3318	187	602	511.658	443.021	522.215	1948.35	271.617	780.096	746.16	492.298	1000.02	2.03133	1.02243	0.00298498	0.0477672	chrX	5897307	5902135	plus
WBGene00021578	864	397	186	591	1163	958	445.189	464.062	265.388	347.039	1689.25	1241.41	742.057	391.546	1092.57	2.79039	1.48047	0.00298594	0.0477672	chrII	862933	866908	minus
WBGene00044445	69	86	32	1347	20	56	35.5533	100.527	45.6582	790.968	29.0499	72.567	179.054	60.5796	297.528	4.91136	2.29612	0.00301093	0.0480648	chrIII	8234452	8235458	minus
WBGene00006674	114	63	41	74	248	151	58.7402	73.642	58.4995	43.4533	360.219	195.672	131.704	63.6273	199.781	3.13987	1.6507	0.00307541	0.048938	chrX	16299832	16304050	plus
WBGene00009261	661	707	798	11961	153	1049	340.59	826.427	1138.6	7023.58	222.232	1359.34	1818.46	768.54	2868.38	3.73225	1.90005	0.00307672	0.048938	chrI	9479100	9480670	minus
WBGene00008512	987	621	638	5879	161	628	508.567	725.9	910.31	3452.19	233.852	813.787	1107.43	714.926	1499.94	2.09804	1.06904	0.00310753	0.0492993	chrIV	10246140	10249885	plus
WBGene00009908	907	279	232	820	959	603	467.345	326.129	331.022	481.51	1392.94	781.391	630.057	374.832	885.281	2.36181	1.23989	0.00310865	0.0492993	chrV	17023449	17025505	plus
WBGene00006670	256	117	62	817	119	211	131.908	136.764	88.4627	479.748	172.847	273.422	213.859	119.045	308.672	2.59291	1.37457	0.00315692	0.0499351	chrX	3081123	3085326	plus

## Sheet: rbbp-5 up
WBGeneID	WT_1	WT_2	WT_3	rbbp5_1	rbbp5_2	rbbp5_3	WT_1_norm	WT_2_norm	WT_3_norm	rbbp5_1_norm	rbbp5_2_norm	rbbp5_3_norm	baseMean	baseMeanA	baseMeanB	foldChange	log2FoldChange	pval	padj	chrom	start	end	strand
WBGene00011594	289	160	135	11386	132	821	148.912	187.027	192.62	6685.94	191.729	1063.88	1411.69	176.186	2647.18	15.0249	3.90928	6.40286e-36	1.17179e-31	chrIV	10533897	10536410	plus
WBGene00001544	1314	564	486	7533	2493	3490	677.058	659.272	693.434	4423.43	3621.07	4522.48	2432.79	676.588	4188.99	6.19135	2.63025	3.32672e-19	1.52206e-15	chrII	3250989	3259358	minus
WBGene00015236	1099	335	280	4839	2854	2700	566.276	391.589	399.509	2841.5	4145.42	3498.77	1973.84	452.458	3495.23	7.72498	2.94953	3.71335e-17	8.49476e-14	chrI	10648590	10654168	minus
WBGene00021779	103	42	44	70	871	397	53.0723	49.0947	62.78	41.1045	1265.12	514.448	330.937	54.9823	606.892	11.0379	3.4644	6.00984e-17	1.22207e-13	chrII	1467734	1469681	plus
WBGene00000059	243	121	82	807	1146	620	125.209	141.439	116.999	473.876	1664.56	803.421	554.251	127.883	980.619	7.66811	2.93887	4.72666e-16	8.65026e-13	chrII	14373755	14377814	minus
WBGene00010041	295	187	118	4523	91	344	152.003	218.588	168.365	2655.94	132.177	445.769	628.807	179.652	1077.96	6.00027	2.58503	3.02025e-14	4.45612e-11	chrII	8566469	8566806	minus
WBGene00017467	290	142	118	700	196	1820	149.427	165.987	168.365	411.045	284.689	2358.43	589.657	161.259	1018.05	6.31315	2.65836	3.65236e-14	4.45612e-11	chrV	5132726	5137085	plus
WBGene00003579	802	381	298	1628	2396	1460	413.243	445.359	425.192	955.973	3480.18	1891.93	1268.65	427.931	2109.36	4.9292	2.30135	3.14332e-13	2.73933e-10	chrV	2662963	2665001	minus
WBGene00017489	96	71	59	1790	124	248	49.4654	82.9934	84.1823	1051.1	180.109	321.368	294.87	72.2137	517.526	7.16659	2.84129	3.54215e-13	2.94658e-10	chrIV	4293613	4299076	minus
WBGene00011185	973	425	386	7368	642	1330	501.353	496.792	550.752	4326.54	932.502	1723.47	1421.9	516.299	2327.5	4.50806	2.17251	8.87273e-13	6.76582e-10	chrV	13932567	13934631	minus
WBGene00006418	467	257	206	5985	80	334	240.629	300.413	293.925	3514.43	116.2	432.811	816.402	278.322	1354.48	4.8666	2.28291	1.86833e-12	1.31509e-09	chrV	9144593	9146877	minus
WBGene00020192	356	198	230	9852	42	311	183.434	231.446	328.168	5785.16	61.0048	403.006	1165.37	247.683	2083.06	8.41018	3.07214	2.50057e-12	1.69492e-09	chrI	3853838	3854242	plus
WBGene00020774	659	331	288	503	2099	1481	339.56	386.913	410.924	295.365	3048.79	1919.14	1066.78	379.132	1754.43	4.62749	2.21023	3.95358e-12	2.49498e-09	chrII	3753924	3757359	plus
WBGene00021389	337	238	239	11176	98	524	173.644	278.203	341.01	6562.63	142.345	679.02	1362.81	264.286	2461.33	9.31314	3.21927	6.19965e-12	3.65999e-09	chrV	6057347	6063408	minus
WBGene00020223	298	188	163	360	1311	675	153.549	219.757	232.571	211.395	1904.22	874.692	599.364	201.959	996.769	4.9355	2.3032	9.14046e-12	5.06908e-09	chrII	4668641	4671787	minus
WBGene00017717	632	401	358	6012	550	1107	325.647	468.737	510.801	3530.29	798.872	1434.49	1178.14	435.062	1921.22	4.41597	2.14273	1.27345e-11	6.65871e-09	chrX	5999573	6001499	minus
WBGene00003178	122	82	80	2744	13	115	62.8623	95.8516	114.145	1611.3	18.8824	149.022	342.01	90.9531	593.067	6.52058	2.705	1.38267e-11	7.01743e-09	chrIV	7983850	7987171	minus
WBGene00001091	441	266	240	3979	205	866	227.232	310.933	342.436	2336.5	297.761	1122.2	772.843	293.534	1252.15	4.26578	2.09281	1.98255e-11	9.30326e-09	chrIV	6613907	6618487	minus
WBGene00007153	192	151	113	2997	104	591	98.9309	176.507	161.23	1759.86	151.059	765.841	518.905	145.556	892.254	6.12996	2.61588	3.83623e-11	1.75517e-08	chrV	13134926	13138071	minus
WBGene00001403	1068	528	529	9849	195	1019	550.303	617.191	754.787	5783.4	283.237	1320.46	1551.56	640.76	2462.37	3.84288	1.94219	4.2336e-11	1.88973e-08	chrIV	9540789	9546233	plus
WBGene00007791	705	349	243	1049	2015	1109	363.262	407.954	346.717	615.98	2926.78	1437.09	1016.3	372.644	1659.95	4.45451	2.15527	4.65297e-11	2.02748e-08	chrIII	4423686	4429471	minus
WBGene00016953	103	102	101	1105	2940	1484	53.0723	119.23	144.109	648.864	4270.34	1923.03	1193.11	105.47	2280.74	21.6245	4.43459	6.74841e-11	2.87216e-08	chrIV	5685282	5688293	plus
WBGene00019997	202	76	82	338	815	382	104.084	88.838	116.999	198.476	1183.78	495.011	364.532	103.307	625.757	6.05726	2.59867	8.07757e-11	3.35972e-08	chrIII	2937039	2944036	minus
WBGene00012668	240	143	124	1491	257	689	123.664	167.156	176.925	875.526	373.291	892.834	434.899	155.915	713.884	4.57867	2.19493	3.91182e-10	1.4318e-07	chrV	19157630	19158791	minus
WBGene00010285	2278	1063	1027	18393	376	1504	1173.77	1242.56	1465.34	10800.5	546.138	1948.94	2862.88	1293.89	4431.86	3.42521	1.77619	5.10077e-10	1.83038e-07	chrV	11929086	11929971	plus
WBGene00007328	457	218	122	427	1297	786	235.476	254.825	174.072	250.737	1883.89	1018.53	636.254	221.458	1051.05	4.74606	2.24673	6.58041e-10	2.20261e-07	chrII	9918066	9920509	minus
WBGene00011561	582	370	370	6845	532	1315	299.884	432.501	527.923	4019.43	772.727	1704.03	1292.75	420.103	2165.4	5.15445	2.36582	6.73984e-10	2.20261e-07	chrIII	10337746	10339341	plus
WBGene00045062	1032	506	296	3058	1380	1703	531.753	591.474	422.338	1795.68	2004.44	2206.82	1258.75	515.189	2002.31	3.88656	1.95849	8.25618e-10	2.60511e-07	chrIV	13456952	13460229	minus
WBGene00001387	2854	1656	1702	31148	864	5042	1470.57	1935.73	2428.44	18290.3	1254.96	6533.63	5318.94	1944.91	8692.97	4.46959	2.16014	1.29697e-09	3.95598e-07	chrV	12996803	12997509	minus
WBGene00007343	524	324	316	7168	92	403	269.999	378.731	450.875	4209.1	133.63	522.224	994.093	366.535	1621.65	4.42428	2.14544	1.86054e-09	5.58191e-07	chrX	12941371	12943477	minus
WBGene00019248	141	82	52	150	556	405	72.6524	95.8516	74.1946	88.0811	807.587	524.815	277.197	80.8995	473.495	5.85287	2.54915	2.50303e-09	7.27109e-07	chrI	6845179	6846953	minus
WBGene00010652	271	160	150	1910	156	652	139.637	187.027	214.023	1121.57	226.589	844.888	455.622	180.229	731.014	4.05603	2.02007	2.67925e-09	7.66141e-07	chrI	11483382	11484561	plus
WBGene00011951	352	227	171	844	903	693	181.373	265.345	243.986	495.603	1311.6	898.017	565.988	230.235	901.741	3.91661	1.96961	6.36621e-09	1.73579e-06	chrIV	12723080	12724579	minus
WBGene00009109	210	110	114	2149	83	300	108.206	128.581	162.657	1261.91	120.557	388.752	361.777	133.148	590.406	4.4342	2.14867	6.44957e-09	1.73579e-06	chrV	10540357	10545718	plus
WBGene00044760	311	150	142	391	881	633	160.247	175.338	202.608	229.598	1279.65	820.267	477.951	179.398	776.504	4.32839	2.11383	7.95059e-09	2.10875e-06	chrIII	2802442	2803673	plus
WBGene00020260	131	49	70	1659	67	121	67.4997	57.2771	99.8773	974.177	97.3172	156.797	242.157	74.8847	409.43	5.46747	2.45087	9.14018e-09	2.32505e-06	chrI	6192289	6194901	minus
WBGene00021928	552	226	196	3314	343	595	284.426	264.176	279.656	1946	498.206	771.025	673.916	276.086	1071.74	3.88192	1.95677	9.14723e-09	2.32505e-06	chrIV	1038669	1041008	minus
WBGene00001622	88	45	48	1453	28	84	45.3433	52.6015	68.4873	853.212	40.6699	108.851	194.861	55.4774	334.244	6.02487	2.59093	1.13593e-08	2.80928e-06	chrX	6403385	6406876	plus
WBGene00008568	279	149	95	970	546	500	143.759	174.169	135.548	569.591	793.062	647.92	410.675	151.159	670.191	4.43369	2.14851	1.2443e-08	3.03627e-06	chrI	12955327	12957891	minus
WBGene00010135	971	642	585	4719	843	3261	500.322	750.448	834.689	2771.03	1224.45	4225.73	1717.78	695.153	2740.41	3.94216	1.97899	1.74209e-08	4.19499e-06	chrI	8893301	8894130	minus
WBGene00008495	88	86	72	1952	78	507	45.3433	100.527	102.731	1146.23	113.295	656.991	360.853	82.8672	638.838	7.70918	2.94658	2.66743e-08	6.10209e-06	chrII	14001611	14002226	minus
WBGene00022145	510	296	167	807	1238	731	262.785	346.001	238.279	473.876	1798.19	947.259	677.731	282.355	1073.11	3.80057	1.92621	2.82561e-08	6.35584e-06	chrI	1799719	1807011	plus
WBGene00001548	436	243	247	2392	459	636	224.656	284.048	352.424	1404.6	666.695	824.154	626.096	287.043	965.15	3.36239	1.74949	2.85791e-08	6.35584e-06	chrIV	3282882	3289334	minus
WBGene00009968	784	361	229	5430	166	611	403.968	421.981	326.741	3188.53	241.114	791.758	895.683	384.23	1407.14	3.66222	1.87272	2.88255e-08	6.35584e-06	chrV	10967952	10980755	minus
WBGene00019368	734	251	244	1523	1313	793	378.205	293.399	348.144	894.316	1907.13	1027.6	808.132	339.916	1276.35	3.75489	1.90877	4.05415e-08	8.42838e-06	chrIV	1510563	1515301	plus
WBGene00004249	170	128	134	1569	754	710	87.595	149.622	191.194	921.328	1095.18	920.046	560.828	142.804	978.852	6.85453	2.77706	4.13565e-08	8.42838e-06	chrIII	1821141	1824105	minus
WBGene00000048	113	89	68	1652	25	152	58.2249	104.034	97.0236	970.066	36.3124	196.968	243.771	86.4275	401.115	4.64106	2.21445	4.18943e-08	8.42838e-06	chrX	13642278	13646828	minus
WBGene00000233	276	174	170	3050	94	301	142.213	203.392	242.559	1790.98	136.535	390.048	484.288	196.055	772.521	3.94033	1.97832	4.19093e-08	8.42838e-06	chrV	13498772	13511705	minus
WBGene00007754	293	217	180	3370	83	509	150.973	253.656	256.827	1978.89	120.557	659.583	570.081	220.485	919.676	4.17114	2.06044	5.64972e-08	1.09995e-05	chrV	12138232	12140259	plus
WBGene00019793	993	464	356	719	2454	1018	511.658	542.38	507.947	422.202	3564.42	1319.17	1144.63	520.662	1768.6	3.39683	1.76419	5.72267e-08	1.10243e-05	chrII	3641503	3644085	plus
WBGene00022252	294	116	112	2057	147	350	151.488	135.595	159.804	1207.89	213.517	453.544	386.972	148.962	624.982	4.19558	2.06887	5.80657e-08	1.10694e-05	chrIV	6442276	6446541	plus
WBGene00009957	347	220	199	1944	169	783	178.797	257.163	283.937	1141.53	245.472	1014.64	520.257	239.965	800.548	3.3361	1.73816	7.52437e-08	1.40514e-05	chrIV	12526225	12527317	minus
WBGene00007405	4144	2526	2259	24824	2143	5036	2135.26	2952.7	3223.18	14576.8	3112.7	6525.85	5421.09	2770.38	8071.79	2.91361	1.54281	8.67052e-08	1.60282e-05	chrIII	9663208	9667445	minus
WBGene00021530	556	290	225	418	1411	801	286.487	338.987	321.034	245.453	2049.47	1037.97	713.233	315.503	1110.96	3.52125	1.81609	1.00089e-07	1.81359e-05	chrX	2998293	3003793	minus
WBGene00019154	11830	5888	5073	75049	1774	6506	6095.58	6882.61	7238.25	44069.3	2576.73	8430.73	12548.9	6738.81	18358.9	2.72435	1.44591	1.13485e-07	2.01639e-05	chrIV	5885823	5889793	plus
WBGene00007489	88	59	39	196	402	196	45.3433	68.9664	55.6459	115.093	583.903	253.985	187.156	56.6519	317.66	5.60723	2.48729	1.20967e-07	2.12867e-05	chrII	10714854	10716395	plus
WBGene00001386	743	431	387	3839	444	1015	382.842	503.805	552.179	2254.29	644.908	1315.28	942.217	479.609	1404.82	2.92911	1.55046	1.24655e-07	2.15219e-05	chrIII	9081602	9082813	plus
WBGene00000481	120	48	63	1332	73	123	61.8318	56.1082	89.8896	782.16	106.032	159.388	209.235	69.2765	349.193	5.04057	2.33359	1.27098e-07	2.17385e-05	chrIV	3613782	3624692	minus
WBGene00006894	2525	930	739	2253	4307	2784	1301.04	1087.1	1054.42	1322.98	6255.9	3607.62	2438.18	1147.52	3728.83	3.24947	1.7002	1.28574e-07	2.17873e-05	chrIII	156823	163541	plus
WBGene00009543	365	166	87	1259	513	456	188.072	194.041	124.133	739.294	745.13	590.903	430.262	168.749	691.776	4.09944	2.03543	1.64726e-07	2.7159e-05	chrIV	9463513	9467501	minus
WBGene00019592	85	51	43	856	48	219	43.7975	59.615	61.3532	502.649	69.7198	283.789	170.154	54.9219	285.386	5.19621	2.37746	1.8427e-07	2.98436e-05	chrII	2280683	2282881	minus
WBGene00016219	88	83	60	1694	24	221	45.3433	97.0205	85.6091	994.729	34.8599	286.381	257.324	75.991	438.656	5.77248	2.52919	1.97241e-07	3.13887e-05	chrIII	120491	124685	plus
WBGene00194904	1410	668	549	963	2887	1774	726.524	780.84	783.323	565.48	4193.35	2298.82	1558.06	763.562	2352.55	3.08102	1.62341	2.03158e-07	3.17777e-05	chrV	2626164	2629997	minus
WBGene00044463	218	148	140	2858	45	141	112.328	173	199.755	1678.24	65.3623	182.713	401.899	161.694	642.105	3.9711	1.98954	2.45056e-07	3.79139e-05	chrIV	1219333	1221206	minus
WBGene00016273	921	620	512	2569	1696	1677	474.559	724.731	730.531	1508.54	2463.43	2173.12	1345.82	643.274	2048.36	3.18428	1.67097	2.4653e-07	3.79139e-05	chrII	7299530	7301599	plus
WBGene00050912	690	403	270	777	1481	1012	355.533	471.075	385.241	456.26	2151.15	1311.39	855.107	403.95	1306.27	3.23373	1.6932	2.70822e-07	4.12201e-05	chrII	7371766	7372523	plus
WBGene00011508	14426	7924	7350	93478	2496	7733	7433.21	9262.53	10487.1	54890.9	3625.43	10020.7	15953.3	9060.95	22845.7	2.52134	1.33419	2.72533e-07	4.12201e-05	chrII	8048997	8050511	minus
WBGene00018054	158	104	56	497	324	388	81.4119	121.568	79.9018	291.842	470.608	502.786	258.02	94.2938	421.745	4.47267	2.16114	2.90716e-07	4.36098e-05	chrV	3289685	3295120	plus
WBGene00008579	1047	528	455	1530	1765	1527	539.482	617.191	649.202	898.427	2563.65	1978.75	1207.78	601.958	1813.61	3.01285	1.59113	3.20191e-07	4.76408e-05	chrII	13852239	13855218	plus
WBGene00044395	340	106	107	2969	5	116	175.19	123.906	152.67	1743.42	7.26248	150.317	392.127	150.588	633.666	4.20793	2.07311	3.4446e-07	5.04318e-05	chrII	6042768	6043248	minus
WBGene00009433	873	570	465	7226	86	550	449.826	666.285	663.47	4243.16	124.915	712.712	1143.39	593.194	1693.6	2.85504	1.51351	3.86789e-07	5.61795e-05	chrV	13741305	13745114	minus
WBGene00016461	80	57	43	179	348	210	41.2212	66.6285	61.3532	105.11	505.468	272.126	175.318	56.401	294.235	5.21684	2.38318	4.11937e-07	5.85126e-05	chrI	10807053	10808227	plus
WBGene00021977	887	495	489	1318	405	2802	457.04	578.616	697.714	773.939	588.261	3630.94	1121.09	577.79	1664.38	2.8806	1.52637	4.12443e-07	5.85126e-05	chrV	5077834	5080881	minus
WBGene00044461	203	94	75	1574	72	260	104.599	109.879	107.011	924.264	104.58	336.918	281.208	107.163	455.254	4.24824	2.08687	4.23077e-07	5.95595e-05	chrI	667618	674416	minus
WBGene00021947	143	71	93	103	754	293	73.6829	82.9934	132.694	60.4823	1095.18	379.681	304.119	96.4568	511.782	5.30581	2.40757	4.51999e-07	6.26669e-05	chrIV	756721	759084	plus
WBGene00010714	1641	856	704	9836	504	1081	845.55	1000.6	1004.48	5775.77	732.058	1400.8	1793.21	950.209	2636.21	2.77435	1.47215	4.57147e-07	6.29041e-05	chrIV	13434218	13445285	minus
WBGene00008582	460	375	303	3515	987	975	237.022	438.346	432.326	2064.03	1433.61	1263.44	978.13	369.231	1587.03	4.2982	2.10373	4.80767e-07	6.56605e-05	chrIV	12412946	12417640	minus
WBGene00001555	325	111	118	991	497	408	167.461	129.75	168.365	581.922	721.89	528.703	383.015	155.192	610.838	3.93602	1.97674	4.8649e-07	6.595e-05	chrI	13325351	13333549	plus
WBGene00013711	753	352	241	3940	301	702	387.995	411.46	343.863	2313.6	437.201	909.68	800.632	381.106	1220.16	3.20163	1.6788	5.36403e-07	7.21817e-05	chrI	10323783	10327748	minus
WBGene00012704	568	262	292	3859	123	513	292.671	306.257	416.631	2266.03	178.657	664.766	687.502	338.52	1036.49	3.06182	1.61439	6.07683e-07	7.94372e-05	chrIV	12222848	12227030	minus
WBGene00011676	874	475	327	4322	503	793	450.342	555.238	466.57	2537.91	730.605	1027.6	961.377	490.716	1432.04	2.91826	1.54511	6.49144e-07	8.42552e-05	chrII	9783759	9787339	minus
WBGene00002089	87	39	61	1712	58	141	44.8281	45.5879	87.0359	1005.3	84.2447	182.713	241.618	59.1506	424.086	7.16959	2.84189	6.82469e-07	8.77266e-05	chrII	6000465	6000987	plus
WBGene00007903	1472	760	781	6791	1107	1132	758.47	888.38	1114.35	3987.72	1607.91	1466.89	1637.29	920.398	2354.18	2.55778	1.35489	7.53094e-07	9.48739e-05	chrX	14064246	14067915	minus
WBGene00006445	1452	910	801	3953	2476	1842	748.165	1063.72	1142.88	2321.23	3596.38	2386.94	1876.55	984.922	2768.18	2.81056	1.49086	7.56876e-07	9.48739e-05	chrI	10501574	10505938	plus
WBGene00010348	96	51	38	1116	17	129	49.4654	59.615	54.2191	655.323	24.6924	167.163	168.413	54.4332	282.393	5.18788	2.37515	8.34353e-07	0.000103874	chrIV	11803250	11804093	minus
WBGene00001477	1182	681	616	3653	606	2285	609.043	796.035	878.92	2145.07	880.212	2960.99	1378.38	761.333	1995.42	2.62096	1.3901	8.79416e-07	0.000108015	chrIV	10682504	10684365	plus
WBGene00010907	273	151	149	2053	135	285	140.667	176.507	212.596	1205.54	196.087	369.314	383.451	176.59	590.312	3.34284	1.74107	9.66506e-07	0.000117139	chrIII	4549031	4551473	plus
WBGene00004969	2915	1241	1029	7585	2719	2841	1502	1450.63	1468.2	4453.97	3949.33	3681.48	2750.93	1473.61	4028.26	2.7336	1.4508	1.01406e-06	0.000122094	chrI	1446668	1465342	plus
WBGene00022295	175	106	88	1139	192	243	90.1714	123.906	125.56	668.829	278.879	314.889	267.039	113.212	420.866	3.71749	1.89433	1.11365e-06	0.000132344	chrIV	2037191	2043191	plus
WBGene00013592	621	275	306	3457	173	695	319.98	321.453	436.606	2029.97	251.282	900.609	709.984	359.346	1060.62	2.95153	1.56146	1.18907e-06	0.000139495	chrII	13091517	13094202	plus
WBGene00018726	131	102	90	1994	2	117	67.4997	119.23	128.414	1170.89	2.90499	151.613	273.425	105.048	441.803	4.20573	2.07236	1.21058e-06	0.000141114	chrX	8708313	8709318	plus
WBGene00003565	147	75	57	782	195	247	75.744	87.6691	81.3286	459.196	283.237	320.072	217.874	81.5806	354.168	4.34133	2.11814	1.24013e-06	0.000141631	chrX	1054211	1056686	plus
WBGene00011454	396	268	252	3827	127	523	204.045	313.271	359.558	2247.24	184.467	677.724	664.384	292.291	1036.48	3.54604	1.82621	1.24598e-06	0.000141631	chrIV	9560770	9566588	minus
WBGene00007891	145	37	56	1549	12	54	74.7134	43.2501	79.9018	909.584	17.4299	69.9754	199.142	65.9551	332.33	5.03873	2.33306	1.27636e-06	0.000144189	chrII	11370251	11372009	minus
WBGene00003890	194	174	163	3508	153	637	99.9614	203.392	232.571	2059.92	222.232	825.45	607.255	178.642	1035.87	5.79858	2.5357	1.32463e-06	0.000147818	chrIII	7243243	7245673	plus
WBGene00019619	140	89	95	824	97	465	72.1371	104.034	135.548	483.859	140.892	602.566	256.506	103.906	409.105	3.93725	1.97719	1.37853e-06	0.000152639	chrX	6444148	6446701	minus
WBGene00021288	344	154	130	469	802	416	177.251	180.014	185.486	275.4	1164.9	539.069	420.354	180.917	659.79	3.64692	1.86668	1.38452e-06	0.000152639	chrII	3114258	3116762	plus
WBGene00004157	6157	3740	2847	2813	13072	6159	3172.49	4371.77	4062.15	1651.81	18987	7981.08	6704.39	3868.8	9539.97	2.46587	1.3021	1.511e-06	0.0001646	chrIV	4072320	4077629	plus
WBGene00017964	204	177	131	927	142	1142	105.114	206.899	186.913	544.341	206.254	1479.85	454.895	166.309	743.482	4.47049	2.16043	1.62403e-06	0.000175866	chrV	6276423	6278137	plus
WBGene00015645	763	411	375	4944	137	628	393.147	480.427	535.057	2903.15	198.992	813.787	887.427	469.544	1305.31	2.77996	1.47506	1.67393e-06	0.000180203	chrII	553094	554785	plus
WBGene00009958	2963	1249	1231	15360	550	2016	1526.73	1459.98	1756.41	9019.5	798.872	2612.41	2862.32	1581.04	4143.6	2.6208	1.39001	1.77707e-06	0.000188518	chrI	8931028	8942280	minus
WBGene00008229	83	71	63	1581	30	60	42.767	82.9934	89.8896	928.374	43.5749	77.7504	210.892	71.8833	349.9	4.86761	2.28321	1.78206e-06	0.000188518	chrV	9526709	9529226	plus
WBGene00019289	962	529	435	1885	1714	919	495.685	618.359	620.666	1106.89	2489.58	1190.88	1087.01	578.237	1595.78	2.75973	1.46453	1.85092e-06	0.000193564	chrII	7425893	7431348	minus
WBGene00018470	308	144	143	2538	56	188	158.702	168.325	204.035	1490.33	81.3397	243.618	391.058	177.02	605.096	3.41823	1.77325	1.92958e-06	0.000200644	chrIV	7628197	7629029	minus
WBGene00010722	202	124	130	1360	134	374	104.084	144.946	185.486	798.602	194.634	484.644	318.733	144.839	492.627	3.40121	1.76605	2.20747e-06	0.000226949	chrII	14114137	14122090	minus
WBGene00003590	464	268	203	3074	109	434	239.083	313.271	289.644	1805.07	158.322	562.395	561.298	280.666	841.93	2.99976	1.58485	2.51864e-06	0.000253262	chrIII	4442053	4444211	plus
WBGene00018232	108	45	46	732	107	181	55.6486	52.6015	65.6336	429.836	155.417	234.547	165.614	57.9612	273.267	4.71464	2.23715	2.59423e-06	0.000258027	chrI	2645268	2657243	minus
WBGene00003672	185	69	23	3813	57	82	95.324	80.6556	32.8168	2239.02	82.7922	106.259	439.478	69.5988	809.357	11.6289	3.53964	2.82774e-06	0.000276941	chrI	12245447	12246742	plus
WBGene00003741	315	156	180	2244	105	308	162.308	182.352	256.827	1317.69	152.512	399.119	411.802	200.496	623.108	3.10783	1.63591	2.82979e-06	0.000276941	chrX	13177785	13178385	minus
WBGene00022236	288	128	78	505	563	376	148.396	149.622	111.292	296.54	817.755	487.236	335.14	136.437	533.843	3.91276	1.96818	2.92037e-06	0.000284286	chrIV	6317036	6321346	minus
WBGene00017157	300	113	89	1406	233	292	154.579	132.088	126.987	825.613	338.431	378.385	326.014	137.885	514.143	3.72879	1.89871	3.07642e-06	0.000296324	chrX	6996831	7005532	minus
WBGene00017406	1566	989	806	1094	3488	1590	806.905	1156.06	1150.02	642.405	5066.3	2060.39	1813.68	1037.66	2589.7	2.49571	1.31945	3.14079e-06	0.000296787	chrII	3730155	3731551	minus
WBGene00019754	102	95	56	1609	39	155	52.557	111.048	79.9018	944.816	56.6473	200.855	240.971	81.1688	400.773	4.93752	2.30379	3.24714e-06	0.000304748	chrV	5617638	5618325	plus
WBGene00011928	91	53	68	1437	39	127	46.8891	61.9528	97.0236	843.817	56.6473	164.572	211.817	68.6219	355.012	5.17345	2.37113	3.46736e-06	0.000321728	chrII	8630733	8634264	minus
WBGene00001543	319	227	153	1632	323	376	164.37	265.345	218.303	958.322	469.156	487.236	427.122	216.006	638.238	2.95472	1.56302	3.5942e-06	0.00033054	chrIV	12860113	12865911	plus
WBGene00009917	403	183	192	2979	65	248	207.652	213.913	273.949	1749.29	94.4122	321.368	476.764	231.838	721.69	3.11291	1.63826	3.77334e-06	0.000344409	chrI	7339202	7345947	plus
WBGene00008726	283	161	169	771	258	728	145.82	188.196	241.132	452.737	374.744	943.371	391	191.716	590.284	3.07895	1.62244	4.04772e-06	0.00036672	chrV	16394011	16395057	minus
WBGene00044488	224	172	191	2490	242	1008	115.419	201.054	272.522	1462.15	351.504	1306.21	618.142	196.332	1039.95	5.2969	2.40515	4.08762e-06	0.000367433	chrIV	2805855	2809028	plus
WBGene00006064	503	299	271	3390	128	436	259.178	349.508	386.668	1990.63	185.919	564.986	622.815	331.785	913.846	2.75434	1.4617	4.11868e-06	0.000367433	chrX	5307464	5323353	minus
WBGene00016468	303	143	145	2226	96	220	156.125	167.156	206.889	1307.12	139.44	285.085	376.97	176.723	577.216	3.26621	1.70762	4.13591e-06	0.000367433	chrX	7089185	7096406	minus
WBGene00044484	215	134	142	1927	78	324	110.782	156.635	202.608	1131.55	113.295	419.852	355.787	156.675	554.898	3.54171	1.82445	4.20352e-06	0.000369849	chrIV	5040918	5045388	minus
WBGene00018031	175	73	63	1437	101	86	90.1714	85.3313	89.8896	843.817	146.702	111.442	227.892	88.4641	367.32	4.1522	2.05388	4.33858e-06	0.000376767	chrX	17019543	17020732	minus
WBGene00018809	120	66	32	1402	5	43	61.8318	77.1488	45.6582	823.264	7.26248	55.7211	178.481	61.5463	295.416	4.7999	2.263	4.37302e-06	0.000376767	chrII	3825663	3827881	minus
WBGene00018885	149	125	87	1415	42	297	76.7745	146.115	124.133	830.898	61.0048	384.864	270.632	115.674	425.589	3.6792	1.87939	4.60198e-06	0.000393555	chrX	8344648	8346307	minus
WBGene00003664	51	101	45	7370	62	231	26.2785	118.061	64.2068	4327.72	90.0547	299.339	820.943	69.5155	1572.37	22.619	4.49946	4.75912e-06	0.0004051	chrI	11429062	11432054	plus
WBGene00020086	111	86	68	1173	49	146	57.1944	100.527	97.0236	688.794	71.1723	189.193	200.651	84.9151	316.386	3.72591	1.89759	5.00169e-06	0.00041989	chrX	17483265	17486756	minus
WBGene00003736	1430	847	1007	16888	465	2472	736.829	990.076	1436.81	9916.75	675.41	3203.32	2826.53	1054.57	4598.49	4.36054	2.12451	5.43038e-06	0.000451733	chrIV	11930847	11935691	plus
WBGene00015921	101	61	42	1024	16	146	52.0418	71.3042	59.9264	601.3	23.2399	189.193	166.167	61.0908	271.244	4.44002	2.15057	5.49409e-06	0.000454966	chrX	8173860	8180852	plus
WBGene00004364	2830	1550	1523	14536	917	2465	1458.2	1811.83	2173.04	8535.64	1331.94	3194.25	3084.15	1814.36	4353.94	2.39972	1.26286	5.64392e-06	0.000465268	chrV	10261105	10270289	minus
WBGene00008292	953	396	379	5861	113	448	491.048	462.893	540.764	3441.62	164.132	580.536	946.832	498.235	1395.43	2.80075	1.48581	5.72055e-06	0.000466383	chrI	12449982	12452019	plus
WBGene00019001	5939	2886	2900	25812	2194	4538	3060.16	3373.51	4137.77	15157	3186.77	5880.52	5799.29	3523.81	8074.76	2.29148	1.19628	5.73991e-06	0.000466383	chrI	6569495	6572601	plus
WBGene00020143	709	434	378	4503	144	596	365.323	507.312	539.337	2644.19	209.159	772.321	839.608	470.657	1208.56	2.56781	1.36054	5.76832e-06	0.000466383	chrX	16786371	16787547	plus
WBGene00007229	1548	966	940	12537	348	1510	797.63	1129.18	1341.21	7361.82	505.468	1956.72	2182	1089.34	3274.67	3.0061	1.5879	6.07513e-06	0.000483395	chrII	9293977	9295693	minus
WBGene00013651	398	183	110	286	877	449	205.075	213.913	156.95	167.941	1273.84	581.832	433.258	191.979	674.537	3.51359	1.81295	6.18716e-06	0.000488066	chrIV	15937080	15941459	minus
WBGene00015795	502	270	183	627	1004	577	258.663	315.609	261.108	368.179	1458.31	747.7	568.261	278.46	858.061	3.08145	1.62361	6.28387e-06	0.000493567	chrII	6979909	6988587	plus
WBGene00007565	54	61	63	1535	73	351	27.8243	71.3042	89.8896	901.363	106.032	454.84	275.209	63.006	487.412	7.73595	2.95158	6.32406e-06	0.000494601	chrV	18157999	18159582	plus
WBGene00044522	534	253	227	383	1114	666	275.152	295.737	323.888	224.9	1618.08	863.029	600.131	298.259	902.003	3.02423	1.59657	6.46748e-06	0.000501531	chrV	2631752	2638077	minus
WBGene00010050	728	216	245	1937	646	718	375.113	252.487	349.57	1137.42	938.312	930.413	663.886	325.723	1002.05	3.07638	1.62123	6.69698e-06	0.000514964	chrII	11569745	11570936	plus
WBGene00010274	131	108	60	1599	17	136	67.4997	126.244	85.6091	938.944	24.6924	176.234	236.537	93.1174	379.957	4.08041	2.02871	7.05163e-06	0.000535485	chrIV	9653518	9654210	plus
WBGene00018943	275	123	118	337	630	367	141.698	143.777	168.365	197.889	915.072	475.573	340.396	151.28	529.511	3.50021	1.80744	7.18709e-06	0.000543516	chrX	1365469	1367511	minus
WBGene00022623	1088	538	458	5717	258	821	560.608	628.88	653.483	3357.06	374.744	1063.88	1106.44	614.324	1598.56	2.60215	1.37971	7.4936e-06	0.000563076	chrV	6727821	6730245	plus
WBGene00009412	762	417	355	562	1439	1051	392.632	487.44	506.52	330.01	2090.14	1361.93	861.445	462.198	1260.69	2.72761	1.44764	7.73589e-06	0.000575506	chrI	11741521	11743942	minus
WBGene00003057	556	435	342	4919	264	775	286.487	508.481	487.972	2888.47	383.459	1004.28	926.524	427.647	1425.4	3.33313	1.73688	7.84157e-06	0.000581006	chrV	12197414	12198606	minus
WBGene00001452	435	265	206	2444	197	440	224.14	309.764	293.925	1435.13	286.142	570.17	519.879	275.943	763.815	2.76802	1.46885	8.09514e-06	0.000594977	chrIV	12754535	12757650	minus
WBGene00021089	203	58	79	981	158	235	104.599	67.7974	112.719	576.05	229.494	304.522	232.53	95.0383	370.022	3.8934	1.96103	8.28949e-06	0.000606824	chrIV	3292117	3294630	plus
WBGene00006914	6339	3720	3636	45321	1143	4649	3266.26	4348.39	5187.91	26612.8	1660.2	6024.36	7849.99	4267.52	11432.5	2.67895	1.42167	8.43943e-06	0.000615339	chrIV	8303955	8307356	plus
WBGene00019174	243	88	53	973	146	344	125.209	102.865	75.6214	571.353	212.064	445.769	255.48	101.232	409.729	4.04742	2.017	8.57454e-06	0.000620248	chrIII	3226343	3230643	plus
WBGene00022610	685	224	241	2895	360	475	352.957	261.838	343.863	1699.96	522.898	615.524	632.841	319.553	946.129	2.96079	1.56598	8.88026e-06	0.000639833	chrIV	3609215	3613074	minus
WBGene00013882	1042	421	472	5491	219	711	536.906	492.116	673.458	3224.35	318.096	921.342	1027.71	567.493	1487.93	2.62194	1.39063	9.41145e-06	0.000672808	chrIV	9088596	9092180	plus
WBGene00000296	223	91	79	441	476	250	114.904	106.372	112.719	258.958	691.388	323.96	268.05	111.332	424.769	3.81535	1.93182	9.52396e-06	0.000678202	chrII	257819	261063	plus
WBGene00003850	196	112	128	1772	42	264	100.992	130.919	182.633	1040.53	61.0048	342.102	309.697	138.181	481.213	3.48247	1.80011	9.97323e-06	0.00070471	chrV	13246869	13249520	minus
WBGene00009791	830	527	491	5848	240	788	427.67	616.022	700.568	3433.99	348.599	1021.12	1091.33	581.42	1601.24	2.75401	1.46153	1.03043e-05	0.000725305	chrV	11667473	11669372	plus
WBGene00003093	218	91	87	1238	205	138	112.328	106.372	124.133	726.962	297.761	178.826	257.73	114.278	401.183	3.5106	1.81172	1.07548e-05	0.000751235	chrIV	11621420	11623101	minus
WBGene00010660	404	273	229	2743	75	424	208.167	319.116	326.741	1610.71	108.937	549.436	520.518	284.675	756.361	2.65693	1.40976	1.08305e-05	0.000753643	chrIV	12887036	12890486	minus
WBGene00011287	147	47	53	1149	24	146	75.744	54.9393	75.6214	674.701	34.8599	189.193	184.176	68.7682	299.584	4.35644	2.12315	1.21851e-05	0.000832091	chrV	12882018	12885946	minus
WBGene00003956	1880	903	1009	10547	356	1698	968.698	1055.54	1439.66	6193.27	517.088	2200.34	2062.43	1154.63	2970.23	2.57245	1.36314	1.27233e-05	0.000858208	chrIII	7758665	7761208	plus
WBGene00022645	84	59	66	1333	18	90	43.2823	68.9664	94.17	782.747	26.1449	116.626	188.656	68.8062	308.506	4.48369	2.16469	1.27233e-05	0.000858208	chrV	415714	417707	minus
WBGene00015035	299	162	167	1595	245	276	154.064	189.365	238.279	936.595	355.861	357.652	371.969	193.903	550.036	2.83666	1.50419	1.27617e-05	0.000858208	chrIV	3572467	3577625	plus
WBGene00010385	536	318	317	3436	150	577	276.182	371.717	452.301	2017.64	217.874	747.7	680.57	366.733	994.406	2.71152	1.4391	1.28021e-05	0.000858208	chrV	14901552	14909109	minus
WBGene00020317	250	131	152	1912	97	221	128.816	153.129	216.876	1122.74	140.892	286.381	341.472	166.274	516.671	3.10735	1.63568	1.42706e-05	0.000946257	chrIII	6909169	6912427	minus
WBGene00016572	910	570	323	777	1682	1207	468.891	666.285	460.862	456.26	2443.1	1564.08	1009.91	532.013	1487.81	2.79657	1.48366	1.4356e-05	0.00094848	chrII	3014838	3016925	plus
WBGene00012289	2030	1234	1124	8305	1238	2256	1045.99	1442.45	1603.74	4876.75	1798.19	2923.41	2281.76	1364.06	3199.45	2.34554	1.22992	1.46064e-05	0.000961556	chrI	13418447	13423368	plus
WBGene00015704	1074	623	510	4998	473	894	553.395	728.238	727.677	2934.86	687.03	1158.48	1131.61	669.77	1593.46	2.37911	1.25042	1.47066e-05	0.000964678	chrI	4422033	4426177	plus
WBGene00006831	5908	3523	2898	22039	3215	4786	3044.19	4118.11	4134.92	12941.5	4669.77	6201.89	5851.72	3765.74	7937.71	2.10788	1.07579	1.60973e-05	0.00104751	chrII	6995009	7010579	plus
WBGene00017236	131	75	33	1110	10	151	67.4997	87.6691	47.085	651.8	14.525	195.672	177.375	67.4179	287.332	4.26195	2.09152	1.72135e-05	0.00110535	chrIV	8678682	8679293	minus
WBGene00022060	2352	1061	1081	2150	3854	2138	1211.9	1240.23	1542.39	1262.5	5597.92	2770.51	2270.91	1331.51	3210.31	2.41103	1.26965	1.74734e-05	0.00111811	chrIV	3253263	3254540	minus
WBGene00020390	1984	1007	836	9073	451	1570	1022.29	1177.1	1192.82	5327.73	655.075	2034.47	1901.58	1130.74	2672.42	2.36344	1.24089	1.75914e-05	0.00112174	chrV	1870600	1871788	minus
WBGene00019495	249	112	126	1248	191	265	128.301	130.919	179.779	732.834	277.427	343.398	298.776	146.333	451.22	3.08351	1.62457	1.7943e-05	0.00114019	chrII	658676	659874	plus
WBGene00019828	167	101	85	1239	62	204	86.0493	118.061	121.28	727.55	90.0547	264.351	234.558	108.463	360.652	3.32511	1.7334	1.81146e-05	0.00114711	chrX	4003511	4007613	plus
WBGene00022391	186	141	126	1490	133	271	95.8393	164.818	179.779	874.939	193.182	351.173	309.955	146.812	473.098	3.22247	1.68817	1.86053e-05	0.00116608	chrI	912418	926880	minus
WBGene00008545	319	170	101	1450	263	269	164.37	198.717	144.109	851.45	382.006	348.581	348.205	169.065	527.346	3.11919	1.64117	1.88198e-05	0.0011755	chrII	11588398	11591961	minus
WBGene00021071	229	108	141	1434	204	295	117.996	126.244	201.181	842.055	296.309	382.273	327.676	148.474	506.879	3.41393	1.77144	1.91963e-05	0.00119089	chrV	1116328	1129353	plus
WBGene00015619	1182	520	562	4930	618	811	609.043	607.839	801.872	2894.93	897.642	1050.93	1143.71	672.918	1614.5	2.39925	1.26258	1.95729e-05	0.00120607	chrIV	7658723	7664151	plus
WBGene00044701	71	78	63	1608	15	157	36.5838	91.1759	89.8896	944.229	21.7874	203.447	231.185	72.5497	389.821	5.37316	2.42577	2.03453e-05	0.00124014	chrX	2263168	2267464	minus
WBGene00006690	607	401	278	2639	504	478	312.766	468.737	396.655	1549.64	732.058	619.412	679.878	392.72	967.036	2.46241	1.30007	2.03968e-05	0.00124014	chrIII	11795696	11803140	plus
WBGene00020258	269	70	61	332	584	283	138.606	81.8245	87.0359	194.953	848.257	366.723	286.233	102.489	469.978	4.58564	2.19712	2.11162e-05	0.0012754	chrI	6203899	6206931	plus
WBGene00007868	60	54	65	1943	7	143	30.9159	63.1218	92.7432	1140.94	10.1675	185.305	253.866	62.2603	445.472	7.15499	2.83895	2.27765e-05	0.00135106	chrIV	12923501	12924354	minus
WBGene00000692	719	512	462	5429	313	966	370.476	598.488	659.19	3187.95	454.631	1251.78	1087.09	542.718	1631.45	3.00608	1.58788	2.31053e-05	0.00135964	chrIV	8848169	8849663	plus
WBGene00011866	417	172	193	2437	112	300	214.866	201.054	275.376	1431.02	162.679	388.752	445.625	230.432	660.818	2.86774	1.51991	2.41968e-05	0.00141478	chrI	10300599	10302936	minus
WBGene00010647	472	242	282	2353	330	616	243.205	282.879	402.363	1381.7	479.323	798.237	597.951	309.482	886.42	2.8642	1.51813	2.49671e-05	0.00145055	chrIV	10679311	10680455	minus
WBGene00020634	948	592	507	1224	1619	1124	488.471	692.001	723.397	718.741	2351.59	1456.52	1071.79	634.623	1508.95	2.37771	1.24957	2.61351e-05	0.00150252	chrX	16878075	16880453	minus
WBGene00044261	189	131	125	235	376	560	97.3851	153.129	178.352	137.994	546.138	725.67	306.445	142.955	469.934	3.28728	1.71689	2.72764e-05	0.00154311	chrI	13528695	13531433	minus
WBGene00020766	121	67	74	974	81	126	62.3471	78.3177	105.585	571.94	117.652	163.276	183.186	82.0831	284.289	3.46343	1.7922	2.73204e-05	0.00154311	chrX	2204043	2205056	minus
WBGene00006532	565	175	160	2152	249	447	291.125	204.561	228.291	1263.67	361.671	579.24	488.093	241.326	734.86	3.0451	1.60649	2.73948e-05	0.00154311	chrI	8993995	8998753	plus
WBGene00003759	130	115	93	1421	88	207	66.9844	134.426	132.694	834.421	127.82	268.239	260.764	111.368	410.16	3.68292	1.88085	2.74035e-05	0.00154311	chrIII	11388530	11393160	minus
WBGene00012648	1313	825	764	7054	627	1337	676.543	964.36	1090.09	4142.16	910.714	1732.54	1586.07	910.331	2261.8	2.4846	1.31301	2.79699e-05	0.00156829	chrIII	10629970	10633402	minus
WBGene00009593	217	78	78	1547	53	124	111.813	91.1759	111.292	908.409	76.9822	160.684	243.393	104.76	382.025	3.64667	1.86658	2.81751e-05	0.0015683	chrIII	9893067	9898338	plus
WBGene00002178	2720	1273	1320	12589	509	1955	1401.52	1488.04	1883.4	7392.35	739.32	2533.37	2573	1590.99	3555.01	2.23447	1.15993	2.81936e-05	0.0015683	chrIV	6957630	6963705	plus
WBGene00017351	132	51	71	1207	30	87	68.015	59.615	101.304	708.759	43.5749	112.738	182.334	76.3114	288.357	3.77869	1.91789	2.83254e-05	0.00157086	chrII	7113669	7115832	minus
WBGene00017647	141	92	85	216	392	258	72.6524	107.541	121.28	126.837	569.378	334.327	222.002	100.491	343.514	3.41836	1.7733	2.88774e-05	0.00158704	chrIII	6608351	6610339	plus
WBGene00001462	505	265	291	1988	385	635	260.209	309.764	415.204	1167.37	559.211	822.858	589.102	328.392	849.812	2.5878	1.37172	2.94441e-05	0.00161334	chrX	10604748	10605768	plus
WBGene00001476	599	379	359	4419	92	486	308.644	443.021	512.228	2594.87	133.63	629.778	770.361	421.298	1119.43	2.65709	1.40985	2.97661e-05	0.00162612	chrIV	10661837	10664384	plus
WBGene00007325	669	375	305	3608	148	554	344.712	438.346	435.18	2118.64	214.969	717.895	711.624	406.079	1017.17	2.50485	1.32473	3.01468e-05	0.00164201	chrX	11160915	11163620	plus
WBGene00011331	2667	1322	1297	12098	587	1988	1374.21	1545.31	1850.58	7104.03	852.615	2576.13	2550.48	1590.04	3510.93	2.20808	1.14279	3.06032e-05	0.00166192	chrII	10206655	10209331	plus
WBGene00007717	74	65	62	646	174	172	38.1296	75.9799	88.4627	379.336	252.734	222.884	176.254	67.5241	284.985	4.22049	2.07741	3.07729e-05	0.00166467	chrV	15053741	15056727	plus
WBGene00013080	470	397	256	3003	221	1098	242.175	464.062	365.265	1763.38	321.001	1422.83	763.12	357.167	1169.07	3.27318	1.71069	3.08357e-05	0.00166467	chrV	18573027	18579756	minus
WBGene00009100	108	94	73	1227	53	117	55.6486	109.879	104.158	720.503	76.9822	151.613	203.131	89.895	316.366	3.51929	1.81528	3.1048e-05	0.0016663	chrV	9556692	9561595	minus
WBGene00001729	446	178	146	465	679	596	229.808	208.068	208.315	273.051	986.244	772.321	446.301	215.397	677.205	3.14398	1.65259	3.18089e-05	0.00170215	chrIV	2126096	2128852	minus
WBGene00001457	94	53	39	683	65	142	48.4349	61.9528	55.6459	401.062	94.4122	184.009	140.92	55.3446	226.495	4.09245	2.03296	3.191e-05	0.00170258	chrIII	12910128	12914833	plus
WBGene00017041	138	77	61	1084	20	179	71.1066	90.0069	87.0359	636.532	29.0499	231.955	190.948	82.7165	299.179	3.61692	1.85476	3.20971e-05	0.00170758	chrIII	8155393	8155877	plus
WBGene00005898	133	81	69	240	362	212	68.5302	94.6826	98.4505	140.93	525.803	274.718	200.519	87.2211	313.817	3.59795	1.84717	3.50626e-05	0.00185457	chrV	560196	562957	plus
WBGene00014101	265	169	161	1424	209	272	136.545	197.548	229.718	836.183	303.571	352.468	342.672	187.937	497.408	2.64667	1.40418	3.57812e-05	0.00188712	chrI	14185631	14196283	minus
WBGene00017798	686	355	281	3129	310	511	353.472	414.967	400.936	1837.37	450.273	662.174	686.532	389.792	983.273	2.52256	1.33489	3.7555e-05	0.00196933	chrV	8539704	8545544	minus
WBGene00000902	2349	1095	1148	12037	324	1286	1210.36	1279.97	1637.99	7068.21	470.608	1666.45	2222.26	1376.1	3068.42	2.22979	1.15691	3.87327e-05	0.00202527	chrX	14888418	14894257	plus
WBGene00010250	487	228	117	1150	347	692	250.934	266.514	166.938	675.288	504.016	896.721	460.069	228.129	692.008	3.03341	1.60094	3.90226e-05	0.00202885	chrV	14057825	14066220	plus
WBGene00015097	106	62	34	293	225	190	54.6181	72.4731	48.5118	172.052	326.811	246.21	153.446	58.5343	248.358	4.24294	2.08506	3.9607e-05	0.00204183	chrIV	5493986	5495241	plus
WBGene00007932	574	385	349	3162	143	918	295.762	450.035	497.96	1856.75	207.707	1189.58	749.632	414.585	1084.68	2.6163	1.38753	4.14498e-05	0.00212485	chrV	13264532	13269849	plus
WBGene00017806	219	69	79	1397	107	99	112.843	80.6556	112.719	820.328	155.417	128.288	235.042	102.072	368.011	3.60539	1.85016	4.17746e-05	0.0021282	chrIII	4820762	4822190	minus
WBGene00011852	107	43	32	766	37	132	55.1334	50.2636	45.6582	449.801	53.7423	171.051	137.608	50.3517	224.865	4.46588	2.15894	4.19423e-05	0.0021282	chrV	16848612	16850174	plus
WBGene00015632	1537	604	590	6503	517	875	791.962	706.029	841.823	3818.61	750.94	1133.86	1340.54	779.938	1901.14	2.43755	1.28543	4.3202e-05	0.00218409	chrI	5497781	5506518	plus
WBGene00012669	241	106	83	1134	131	260	124.179	123.906	118.426	665.893	190.277	336.918	259.933	122.17	397.696	3.25526	1.70277	4.46859e-05	0.00224054	chrV	19145697	19149118	minus
WBGene00013786	464	249	207	410	925	527	239.083	291.061	295.351	240.755	1343.56	682.908	515.453	275.165	755.74	2.7465	1.45759	4.58933e-05	0.00228854	chrIV	16924359	16927154	plus
WBGene00017052	125	164	113	3338	59	366	64.4081	191.703	161.23	1960.1	85.6972	474.277	489.569	139.114	840.024	6.03839	2.59416	4.64971e-05	0.00231188	chrIV	7231224	7232727	plus
WBGene00013215	725	189	197	948	1173	682	373.567	220.926	281.083	556.672	1703.78	883.763	669.965	291.859	1048.07	3.59102	1.84439	4.66574e-05	0.00231188	chrII	14292748	14295979	plus
WBGene00015753	454	382	365	6833	124	572	233.93	446.528	520.789	4012.39	180.109	741.22	1022.49	400.416	1644.57	4.10716	2.03814	4.67403e-05	0.00231188	chrIII	8108724	8111198	plus
WBGene00003957	35	68	58	1569	42	460	18.0343	79.4867	82.7555	921.328	61.0048	596.086	293.116	60.0921	526.14	8.75555	3.1302	4.70762e-05	0.00232221	chrIV	9160625	9165112	minus
WBGene00017295	146	52	77	854	45	222	75.2287	60.7839	109.865	501.475	65.3623	287.676	183.399	81.9592	284.838	3.47536	1.79716	4.82437e-05	0.00236704	chrX	1489714	1494351	minus
WBGene00001783	1713	1583	996	4260	1748	9131	882.649	1850.4	1421.11	2501.5	2538.96	11832.3	3504.49	1384.72	5624.26	4.06166	2.02207	4.92735e-05	0.00240468	chrII	15183733	15185309	minus
WBGene00007919	237	117	125	1469	42	280	122.118	136.764	178.352	862.607	61.0048	362.835	287.28	145.745	428.816	2.94224	1.55692	4.94882e-05	0.00240873	chrII	8707105	8708804	plus
WBGene00006453	521	330	290	3430	77	338	268.453	385.744	413.777	2014.12	111.842	437.994	605.322	355.991	854.652	2.40077	1.26349	5.11825e-05	0.00247802	chrIV	7590550	7605887	plus
WBGene00008486	54	69	43	721	69	313	27.8243	80.6556	61.3532	423.376	100.222	405.598	183.172	56.611	309.732	5.47123	2.45187	5.2029e-05	0.00251235	chrIV	10469743	10471870	plus
WBGene00013960	662	425	340	3586	115	624	341.105	496.792	485.118	2105.72	167.037	808.604	734.063	441.005	1027.12	2.32905	1.21974	5.2885e-05	0.00254029	chrI	8270389	8273476	plus
WBGene00022386	423	197	229	1346	309	582	217.957	230.278	326.741	790.381	448.821	754.179	461.393	258.325	664.46	2.57218	1.36299	5.34581e-05	0.00256109	chrI	882921	890210	plus
WBGene00020651	208	128	96	1427	60	203	107.175	149.622	136.975	837.945	87.1497	263.056	263.654	131.257	396.05	3.01736	1.59329	5.49313e-05	0.0026248	chrIV	266448	268370	plus
WBGene00009830	2219	1341	1105	9697	491	1983	1143.37	1567.52	1576.63	5694.15	713.175	2569.65	2210.75	1429.18	2992.32	2.09374	1.06608	5.81081e-05	0.00276217	chrV	11313382	11316862	minus
WBGene00021848	118	76	72	469	213	197	60.8013	88.838	102.731	275.4	309.381	255.28	182.072	84.1234	280.021	3.32869	1.73495	5.95389e-05	0.00281831	chrIII	2561701	2566582	plus
WBGene00016713	431	244	179	217	892	533	222.079	285.217	255.4	127.424	1295.63	690.683	479.405	254.232	704.577	2.77139	1.47061	6.01526e-05	0.00283725	chrII	3727775	3729837	minus
WBGene00006682	238	90	70	1181	132	180	122.633	105.203	99.8773	693.492	191.729	233.251	241.031	109.238	372.824	3.41296	1.77102	6.04795e-05	0.00284533	chrI	8808986	8811641	minus
WBGene00011433	567	347	290	2749	251	490	292.155	405.616	413.777	1614.23	364.576	634.962	620.886	370.516	871.257	2.35147	1.23356	6.10168e-05	0.00286325	chrI	13310885	13318693	minus
WBGene00012272	288	112	155	1560	172	263	148.396	130.919	221.157	916.043	249.829	340.806	334.525	166.824	502.226	3.01051	1.59001	6.30229e-05	0.0029423	chrIII	10969845	10981749	plus
WBGene00006772	4424	2092	1999	20006	662	2746	2279.53	2445.38	2852.21	11747.7	961.552	3558.38	3974.12	2525.71	5422.53	2.14693	1.10228	6.31885e-05	0.00294253	chrIII	8193777	8201138	minus
WBGene00014902	309	184	156	113	788	355	159.217	215.082	222.584	66.3544	1144.57	460.023	377.971	198.961	556.981	2.79945	1.48515	6.50761e-05	0.00302274	chrIII	12382434	12383643	minus
WBGene00008453	463	243	219	2569	73	407	238.568	284.048	312.473	1508.54	106.032	527.407	496.177	278.363	713.991	2.56497	1.35894	6.54221e-05	0.00303112	chrV	12585080	12587979	plus
WBGene00019484	438	180	152	954	401	578	225.686	210.406	216.876	560.196	582.451	748.995	424.102	217.656	630.547	2.89699	1.53455	6.65506e-05	0.00307561	chrII	4031170	4032651	minus
WBGene00004976	235	78	109	387	344	370	121.087	91.1759	155.523	227.249	499.658	479.461	262.359	122.595	402.123	3.28008	1.71373	6.76534e-05	0.0031187	chrIII	3438999	3444195	minus
WBGene00000169	117	48	40	1032	19	71	60.286	56.1082	57.0727	605.998	27.5974	92.0046	149.844	57.8223	241.867	4.18293	2.06451	6.80855e-05	0.00312919	chrII	7235793	7238308	minus
WBGene00012945	129	47	45	405	156	227	66.4692	54.9393	64.2068	237.819	226.589	294.156	157.363	61.8718	252.855	4.08675	2.03095	6.82229e-05	0.00312919	chrI	11623106	11626553	plus
WBGene00004793	701	331	311	2805	212	718	361.201	386.913	443.74	1647.12	307.929	930.413	679.552	397.285	961.819	2.42098	1.27559	6.85416e-05	0.00313595	chrV	12973245	12976688	minus
WBGene00016759	223	181	162	2506	65	256	114.904	211.575	231.145	1471.54	94.4122	331.735	409.219	185.874	632.563	3.40317	1.76688	6.88801e-05	0.00314238	chrIV	6213811	6216354	plus
WBGene00021325	1720	874	841	8952	230	940	886.256	1021.64	1199.95	5256.68	334.074	1218.09	1652.78	1035.95	2269.61	2.19085	1.13149	6.90255e-05	0.00314238	chrX	5255160	5256827	plus
WBGene00044144	106	65	58	998	8	122	54.6181	75.9799	82.7555	586.033	11.62	158.092	161.516	71.1178	251.915	3.54222	1.82465	6.93787e-05	0.00315062	chrX	12150012	12150971	plus
WBGene00020330	2641	1400	1294	12509	408	1772	1360.81	1636.49	1846.3	7345.37	592.618	2296.23	2512.97	1614.54	3411.41	2.11293	1.07925	7.05431e-05	0.00319526	chrX	6300104	6305182	plus
WBGene00011335	672	375	405	4390	153	618	346.258	438.346	577.861	2577.84	222.232	800.829	827.228	454.155	1200.3	2.64293	1.40214	7.07109e-05	0.00319526	chrII	10231249	10235954	plus
WBGene00010873	494	229	245	2667	84	406	254.541	267.683	349.57	1566.08	122.01	526.111	514.333	290.598	738.067	2.53982	1.34473	7.23035e-05	0.00325117	chrI	7183051	7185707	plus
WBGene00004776	552	365	339	891	1249	717	284.426	426.656	483.691	523.202	1814.17	929.117	743.543	398.258	1088.83	2.73398	1.451	7.36039e-05	0.00329346	chrX	16579672	16587389	plus
WBGene00016234	513	211	256	3000	187	168	264.331	246.642	365.265	1761.62	271.617	217.701	521.196	292.08	750.313	2.56886	1.36113	7.64832e-05	0.00340815	chrV	2582859	2585907	minus
WBGene00010275	145	102	120	2290	23	154	74.7134	119.23	171.218	1344.7	33.4074	199.559	323.805	121.721	525.89	4.32047	2.11119	7.69847e-05	0.00341965	chrIV	9658036	9663924	plus
WBGene00006055	127	101	85	1222	39	114	65.4387	118.061	121.28	717.567	56.6473	147.726	204.453	101.593	307.313	3.02494	1.59691	7.76505e-05	0.00344087	chrX	2823282	2826819	minus
WBGene00014300	619	233	184	1951	324	568	318.949	272.359	262.535	1145.64	470.608	736.037	534.355	284.614	784.096	2.75494	1.46202	7.98436e-05	0.0035203	chrV	11789531	11800520	plus
WBGene00016817	508	288	236	2547	115	492	261.755	336.649	336.729	1495.62	167.037	637.553	539.223	311.711	766.736	2.45976	1.29852	8.06193e-05	0.00353816	chrV	7588520	7590501	minus
WBGene00016237	3505	1922	1791	15414	796	2514	1806	2246.67	2555.43	9051.21	1156.19	3257.74	3345.54	2202.7	4488.38	2.03767	1.02692	8.09547e-05	0.00353891	chrII	6114392	6118237	minus
WBGene00011330	5466	3547	2548	19695	1521	6102	2816.44	4146.16	3635.53	11565	2209.25	7907.22	5379.94	3532.71	7227.17	2.04578	1.03265	8.10769e-05	0.00353891	chrV	13716836	13720389	plus
WBGene00012433	691	468	631	14544	193	951	356.048	547.055	900.322	8540.34	280.332	1232.34	1976.07	601.142	3351.01	5.5744	2.47882	8.32589e-05	0.00361071	chrIV	9254243	9256082	minus
WBGene00018772	595	284	220	1770	446	582	306.583	331.974	313.9	1039.36	647.813	754.179	565.634	317.485	813.783	2.56321	1.35795	8.5504e-05	0.00369931	chrI	134337	137332	plus
WBGene00022175	512	246	305	1908	609	639	263.816	287.555	435.18	1120.39	884.57	828.042	636.592	328.85	944.334	2.87163	1.52187	8.75435e-05	0.00376087	chrIII	2707668	2715114	minus
WBGene00006441	116	36	39	524	134	129	59.7707	42.0812	55.6459	307.697	194.634	167.163	137.832	52.4993	223.165	4.25082	2.08774	8.82153e-05	0.00378086	chrIV	15361562	15368228	plus
WBGene00000089	820	328	338	2967	367	642	422.517	383.406	482.265	1742.24	533.066	831.929	732.571	429.396	1035.75	2.4121	1.27029	8.87802e-05	0.00379618	chrI	13543021	13545179	minus
WBGene00001795	773	470	441	4771	113	505	398.3	549.393	629.227	2801.57	164.132	654.399	866.169	525.64	1206.7	2.29568	1.19892	9.00719e-05	0.00384244	chrIV	11248880	11259443	minus
WBGene00022389	1859	1119	1080	9990	574	1703	957.878	1308.02	1540.96	5866.2	833.732	2206.82	2118.94	1268.95	2968.92	2.33965	1.2263	9.24141e-05	0.00391498	chrI	873484	882716	minus
WBGene00001479	2563	1630	1553	18109	450	1918	1320.62	1905.34	2215.85	10633.7	653.623	2485.42	3202.43	1813.94	4590.93	2.53092	1.33966	9.52317e-05	0.00400652	chrV	13603283	13606691	minus
WBGene00001190	320	243	174	1027	463	425	164.885	284.048	248.266	603.062	672.505	550.732	420.583	232.4	608.766	2.61948	1.38928	9.60602e-05	0.00403211	chrIV	13989069	14012049	plus
WBGene00010350	1484	671	596	6692	264	928	764.653	784.346	850.384	3929.59	383.459	1202.54	1319.16	799.794	1838.53	2.29875	1.20085	9.75612e-05	0.00407641	chrIV	11783918	11792570	minus
WBGene00012429	343	260	214	3214	40	194	176.736	303.92	305.339	1887.28	58.0998	251.393	497.128	261.998	732.259	2.7949	1.4828	9.86429e-05	0.00410287	chrIV	9244495	9245507	minus
WBGene00009541	557	339	272	2861	161	464	287.003	396.264	388.095	1680	233.852	601.27	597.747	357.121	838.374	2.34759	1.23118	9.89271e-05	0.00410536	chrIV	9453631	9457484	minus
WBGene00009730	1858	958	879	5607	1334	1363	957.362	1119.83	1254.17	3292.47	1937.63	1766.23	1721.28	1110.45	2332.11	2.10014	1.07049	0.000102977	0.00426377	chrIII	13409820	13423436	plus
WBGene00009144	585	389	315	3339	140	432	301.43	454.71	449.448	1960.68	203.349	559.803	654.904	401.863	907.946	2.25934	1.1759	0.000103358	0.00426732	chrI	7670322	7672709	minus
WBGene00007174	2232	1392	1270	11120	611	2238	1150.07	1627.14	1812.06	6529.74	887.474	2900.09	2484.43	1529.76	3439.1	2.24814	1.16873	0.000103539	0.00426732	chrX	16030734	16034744	plus
WBGene00008997	392	222	249	2518	265	308	201.984	259.501	355.278	1478.59	384.911	399.119	513.23	272.254	754.206	2.77023	1.47	0.000103763	0.00426732	chrV	15512748	15519793	minus
WBGene00008477	161	241	153	4367	111	711	82.9577	281.71	218.303	2564.33	161.227	921.342	704.979	194.324	1215.63	6.25572	2.64518	0.000104139	0.0042732	chrI	12430019	12431464	minus
WBGene00013334	87	49	46	724	53	92	44.8281	57.2771	65.6336	425.138	76.9822	119.217	131.513	55.9129	207.112	3.7042	1.88916	0.000105696	0.00432739	chrIV	14783355	14784199	minus
WBGene00018282	1162	702	691	7205	294	913	598.738	820.583	985.931	4230.83	427.034	1183.1	1374.37	801.751	1946.99	2.42842	1.28002	0.000106913	0.00435771	chrX	8382652	8384891	minus
WBGene00022834	1025	289	281	1417	1054	1041	528.147	337.818	400.936	832.072	1530.93	1348.97	829.812	422.3	1237.32	2.92996	1.55088	0.000108468	0.00440149	chrI	4364907	4366996	minus
WBGene00021978	627	315	250	725	173	1520	323.071	368.21	356.705	425.725	251.282	1969.68	615.778	349.329	882.228	2.5255	1.33657	0.000115352	0.00461835	chrV	5081987	5084992	minus
WBGene00016246	155	62	60	840	115	125	79.8661	72.4731	85.6091	493.254	167.037	161.98	176.703	79.3161	274.09	3.45567	1.78897	0.000115461	0.00461835	chrII	6201544	6208187	minus
WBGene00007779	10052	4969	4091	14173	10661	8994	5179.44	5808.37	5837.11	8322.49	15485.1	11654.8	8714.54	5608.31	11820.8	2.10773	1.07569	0.000115778	0.00461835	chrIV	12706691	12712291	minus
WBGene00009904	37	67	64	2698	3	77	19.0648	78.3177	91.3164	1584.28	4.35749	99.7797	312.853	62.8996	562.807	8.9477	3.16152	0.00011976	0.00475069	chrII	8381452	8383687	plus
WBGene00021461	448	251	213	1291	451	481	230.839	293.399	303.912	758.084	655.075	623.299	477.435	276.05	678.82	2.45904	1.2981	0.000120491	0.00476265	chrI	2357885	2372966	plus
WBGene00000172	1234	800	748	8421	211	1002	635.837	935.137	1067.26	4944.87	306.476	1298.43	1531.34	879.411	2183.26	2.48264	1.31187	0.000121188	0.00477987	chrV	9737567	9744206	plus
WBGene00014210	192	129	135	1205	234	193	98.9309	150.791	192.62	707.585	339.884	250.097	289.985	147.447	432.522	2.9334	1.55257	0.000124665	0.0048959	chrII	9210316	9213041	plus
WBGene00006675	173	125	73	391	361	223	89.1408	146.115	104.158	229.598	524.351	288.972	230.389	113.138	347.64	3.07271	1.61951	0.000125337	0.00491178	chrX	16306392	16314881	plus
WBGene00006632	134	65	69	1099	20	109	69.0455	75.9799	98.4505	645.341	29.0499	141.247	176.519	81.1586	271.879	3.34997	1.74415	0.000126069	0.00492989	chrX	2820440	2822019	plus
WBGene00014009	13	63	105	15760	10	126	6.69844	73.642	149.816	9254.38	14.525	163.276	1610.39	76.7188	3144.06	40.9816	5.35691	0.000127388	0.00497086	chrIV	12014260	12015636	minus
WBGene00022131	559	332	306	1081	744	663	288.033	388.082	436.606	634.771	1080.66	859.142	614.548	370.907	858.19	2.31376	1.21024	0.00013297	0.0051557	chrI	2776372	2778721	minus
WBGene00014152	902	388	349	918	1078	1092	464.769	453.542	497.96	539.056	1565.79	1415.06	822.696	472.09	1173.3	2.48533	1.31344	0.000136357	0.0052647	chrII	11890928	11894640	minus
WBGene00002052	1093	648	677	6850	286	1100	563.185	757.461	965.956	4022.37	415.414	1425.42	1358.3	762.201	1954.4	2.56416	1.35848	0.000141089	0.00541314	chrX	4912270	4915956	minus
WBGene00021304	236	169	152	1768	81	206	121.603	197.548	216.876	1038.18	117.652	266.943	326.467	178.676	474.259	2.6543	1.40833	0.000141675	0.00541501	chrV	1895796	1906518	plus
WBGene00012664	324	96	109	835	322	304	166.946	112.216	155.523	490.318	467.703	393.935	297.774	144.895	450.652	3.1102	1.63701	0.000141934	0.00541501	chrV	19200984	19203580	minus
WBGene00001988	266	130	161	1307	211	265	137.06	151.96	229.718	767.48	306.476	343.398	322.682	172.913	472.451	2.73231	1.45012	0.000146557	0.00557618	chrII	13930451	13931923	minus
WBGene00003055	933	557	443	2864	531	1029	480.742	651.089	632.08	1681.76	771.275	1333.42	925.061	587.971	1262.15	2.14662	1.10207	0.000150214	0.00568287	chrIII	5474437	5478343	plus
WBGene00001624	50	48	52	902	38	119	25.7632	56.1082	74.1946	529.661	55.1948	154.205	149.188	52.022	246.354	4.73556	2.24354	0.000150293	0.00568287	chrIV	7503609	7506422	plus
WBGene00194921	184	95	115	1061	75	221	94.8088	111.048	164.084	623.027	108.937	286.381	231.381	123.313	339.448	2.75273	1.46086	0.000152511	0.00575106	chrV	7798060	7800583	plus
WBGene00021984	1013	610	675	6251	594	1245	521.963	713.042	963.102	3670.63	862.782	1613.32	1390.81	732.703	2048.91	2.79638	1.48356	0.000152725	0.00575106	chrII	2208117	2212868	plus
WBGene00017671	324	188	245	2802	214	563	166.946	219.757	349.57	1645.35	310.834	729.558	570.337	245.425	895.249	3.64776	1.86701	0.000154113	0.00577957	chrI	4906824	4911832	plus
WBGene00011499	143	52	59	326	246	192	73.6829	60.7839	84.1823	191.43	357.314	248.801	169.366	72.883	265.848	3.6476	1.86695	0.000157541	0.00589601	chrIII	9748850	9749584	plus
WBGene00018791	208	121	122	1201	49	272	107.175	141.439	174.072	705.236	71.1723	352.468	258.594	140.895	376.292	2.67072	1.41723	0.00016101	0.00596734	chrI	5014351	5016260	minus
WBGene00020051	1450	542	644	5872	316	953	747.134	633.555	918.871	3448.08	458.988	1234.94	1240.26	766.52	1714	2.23608	1.16097	0.000164472	0.0060808	chrIII	7575208	7579344	minus
WBGene00014077	141	69	56	1142	31	72	72.6524	80.6556	79.9018	670.591	45.0273	93.3005	173.688	77.7366	269.639	3.46863	1.79437	0.000165228	0.00609643	chrIV	11678417	11681982	minus
WBGene00001518	162	124	160	3102	40	374	83.4729	144.946	228.291	1821.52	58.0998	484.644	470.162	152.237	788.087	5.17672	2.37204	0.000166697	0.00612594	chrIII	6309326	6320819	plus
WBGene00008570	168	112	125	1861	28	148	86.5645	130.919	178.352	1092.79	40.6699	191.784	286.847	131.945	441.749	3.34797	1.74329	0.000167696	0.00615032	chrI	8196053	8208734	plus
WBGene00017193	1023	611	644	6986	192	977	527.116	714.211	918.871	4102.23	278.879	1266.04	1301.22	720.066	1882.38	2.61418	1.38636	0.000170064	0.00621226	chrV	9226071	9227469	plus
WBGene00001669	2188	1117	846	7369	952	1492	1127.4	1305.69	1207.09	4327.13	1382.78	1933.39	1880.58	1213.39	2547.77	2.09971	1.07019	0.000172757	0.00628553	chrIV	10403998	10408245	plus
WBGene00044169	314	137	201	2863	69	342	161.793	160.142	286.79	1681.17	100.222	443.177	472.217	202.909	741.524	3.65447	1.86966	0.000173255	0.00629116	chrII	9375800	9377150	minus
WBGene00000006	843	432	475	4807	198	500	434.368	504.974	677.739	2822.7	287.594	647.92	895.883	539.027	1252.74	2.32408	1.21666	0.000174054	0.00629517	chrI	2571778	2576024	minus
WBGene00001613	349	200	225	2053	205	357	179.827	233.784	321.034	1205.54	297.761	462.615	450.093	244.882	655.304	2.676	1.42008	0.00017628	0.00636313	chrIII	7138621	7144770	minus
WBGene00022675	1112	596	579	5474	202	709	572.975	696.677	826.128	3214.37	293.404	918.751	1087.05	698.593	1475.51	2.11211	1.07869	0.000178843	0.00644293	chrIV	4489005	4506701	minus
WBGene00013586	128	75	45	508	92	247	65.9539	87.6691	64.2068	298.301	133.63	320.072	161.639	72.6099	250.668	3.45225	1.78754	0.000185653	0.006649	chrV	18940439	18946876	plus
WBGene00016769	317	251	266	4122	76	483	163.339	293.399	379.534	2420.47	110.39	625.891	665.503	278.757	1052.25	3.77479	1.9164	0.000186773	0.00666144	chrIV	8648652	8653664	minus
WBGene00000633	192	132	123	1344	42	204	98.9309	154.298	175.499	789.206	61.0048	264.351	257.215	142.909	371.521	2.5997	1.37835	0.000186801	0.00666144	chrI	6232779	6234282	plus
WBGene00020039	382	435	574	20907	113	613	196.831	508.481	818.994	12276.7	164.132	794.35	2459.92	508.102	4411.74	8.68279	3.11816	0.00018997	0.00675076	chrI	4149983	4150639	plus
WBGene00013081	4845	2105	2247	20950	681	2599	2496.46	2460.58	3206.06	12302	989.149	3367.89	4137.02	2721.03	5553.01	2.04077	1.02912	0.000190611	0.00676043	chrV	18582600	18582924	plus
WBGene00012307	297	196	220	2105	131	572	153.034	229.109	313.9	1236.07	190.277	741.22	477.268	232.014	722.523	3.11413	1.63883	0.000195889	0.00692079	chrIII	13734970	13736441	plus
WBGene00014307	5088	3025	3134	30472	1392	4978	2621.67	3535.99	4471.65	17893.4	2021.87	6450.69	6165.87	3543.1	8788.65	2.4805	1.31063	0.000197159	0.00695221	chrII	8784480	8785458	plus
WBGene00012139	6850	3454	2328	11375	6182	5661	3529.57	4037.45	3321.63	6679.48	8979.32	7335.75	5647.2	3629.55	7664.85	2.11179	1.07847	0.000199696	0.00701467	chrI	7486573	7490170	minus
WBGene00006954	85	240	194	10397	21	239	43.7975	280.541	276.803	6105.19	30.5024	309.706	1174.42	200.38	2148.47	10.7219	3.42249	0.000200461	0.00702803	chrV	15342068	15344555	minus
WBGene00022497	1011	1015	692	12209	405	1573	520.933	1186.46	987.358	7169.21	588.261	2038.36	2081.76	898.249	3265.28	3.63516	1.86202	0.000204217	0.0071324	chrIII	1214944	1215279	plus
WBGene00022155	740	338	366	2861	362	512	381.296	395.095	522.215	1680	525.803	663.47	694.647	432.869	956.424	2.2095	1.14372	0.000204739	0.00713702	chrI	1667503	1669776	plus
WBGene00014067	1284	954	1039	15366	323	1788	661.6	1115.15	1482.46	9023.02	469.156	2316.96	2511.39	1086.41	3936.38	3.62331	1.85731	0.000209802	0.00727195	chrII	7911272	7912064	plus
WBGene00001454	94	75	97	2159	10	148	48.4349	87.6691	138.401	1267.78	14.525	191.784	291.432	91.5018	491.363	5.36998	2.42492	0.000210469	0.00728126	chrX	4677315	4678102	minus
WBGene00077697	1024	456	500	5452	65	480	527.631	533.028	713.409	3201.45	94.4122	622.003	948.656	591.356	1305.96	2.20841	1.14301	0.00021421	0.00737402	chrV	9745216	9746251	plus
WBGene00013978	110	75	72	228	313	148	56.6791	87.6691	102.731	133.883	454.631	191.784	171.23	82.3597	260.099	3.15809	1.65905	0.000214766	0.00737402	chrIII	9099552	9101181	minus
WBGene00001461	159	107	128	1233	204	259	81.9271	125.075	182.633	724.026	296.309	335.623	290.932	129.878	451.986	3.48008	1.79912	0.000219257	0.00748625	chrX	3012172	3018545	minus
WBGene00000244	889	414	335	3690	141	719	458.071	483.933	477.984	2166.79	204.802	931.709	787.216	473.329	1101.1	2.32629	1.21803	0.000224829	0.0076477	chrV	6762459	6765055	minus
WBGene00119203	267	105	105	1237	99	236	137.576	122.737	149.816	726.375	143.797	305.818	264.353	136.709	391.997	2.86737	1.51973	0.00022524	0.0076477	chrIII	4709213	4712492	plus
WBGene00006600	430	129	115	1753	111	312	221.564	150.791	164.084	1029.37	161.227	404.302	355.224	178.813	531.634	2.97313	1.57198	0.00022921	0.00774648	chrII	7549287	7551929	plus
WBGene00044107	603	277	311	3203	84	369	310.705	323.791	443.74	1880.82	122.01	478.165	593.206	359.412	827	2.30098	1.20225	0.000229419	0.00774648	chrIV	9651409	9652467	plus
WBGene00001616	96	59	91	1984	30	151	49.4654	68.9664	129.84	1165.02	43.5749	195.672	275.423	82.7574	468.089	5.65615	2.49982	0.000232042	0.00778269	chrV	8716473	8720871	plus
WBGene00007778	1455	724	452	1989	1533	1389	749.711	846.299	644.922	1167.95	2226.67	1799.92	1239.25	746.977	1731.52	2.31803	1.2129	0.000232192	0.00778269	chrIV	12712747	12714732	plus
WBGene00022271	184	131	128	1113	153	221	94.8088	153.129	182.633	653.562	222.232	286.381	265.457	143.523	387.391	2.69915	1.43251	0.000238022	0.0079348	chrI	1594658	1596177	minus
WBGene00000645	286	194	201	2230	84	358	147.366	226.771	286.79	1309.47	122.01	463.911	426.053	220.309	631.797	2.86778	1.51993	0.000238031	0.0079348	chrII	303924	305530	minus
WBGene00002141	970	740	596	5035	658	1147	499.807	865.002	850.384	2956.59	955.742	1486.33	1268.98	738.398	1799.55	2.43711	1.28517	0.000243901	0.0081157	chrI	2451910	2464639	minus
WBGene00019285	3491	2390	2139	22645	833	3032	1798.79	2793.72	3051.96	13297.3	1209.93	3928.99	4346.78	2548.16	6145.41	2.4117	1.27005	0.000251041	0.00832011	chrII	328564	332515	minus
WBGene00021059	1592	822	737	6544	357	1142	820.302	960.853	1051.57	3842.68	518.541	1479.85	1445.63	944.24	1947.02	2.062	1.04405	0.0002533	0.00836757	chrX	5849069	5851936	plus
WBGene00017568	1235	644	645	4444	432	1087	636.352	752.785	920.298	2609.55	627.478	1408.58	1159.17	769.812	1548.53	2.01158	1.00833	0.00025442	0.00838945	chrX	8599888	8602220	plus
WBGene00021519	403	253	230	1702	129	506	207.652	295.737	328.168	999.426	187.372	655.695	445.675	277.186	614.164	2.21571	1.14777	0.000256152	0.00841621	chrIV	1560229	1561810	plus
WBGene00006693	609	271	245	2929	107	387	313.796	316.778	349.57	1719.93	155.417	501.49	559.497	326.715	792.279	2.42499	1.27798	0.000258057	0.00843338	chrV	13346265	13356088	plus
WBGene00001719	2777	1670	1579	13222	1212	1856	1430.89	1952.1	2252.95	7764.05	1760.42	2405.08	2927.58	1878.65	3976.52	2.11669	1.08181	0.000259912	0.00847887	chrV	7774497	7775740	plus
WBGene00012671	166	97	82	265	341	237	85.534	113.385	116.999	155.61	495.301	307.114	212.324	105.306	319.342	3.03251	1.60051	0.000260627	0.00848708	chrV	19136480	19139021	plus
WBGene00006531	255	167	214	3539	85	294	131.393	195.21	305.339	2078.13	123.462	380.977	535.751	210.647	860.855	4.08671	2.03094	0.000264207	0.00858837	chrI	8353404	8357822	plus
WBGene00018992	929	471	438	4535	96	613	478.681	550.562	624.946	2662.98	139.44	794.35	875.161	551.397	1198.92	2.17434	1.12058	0.000266122	0.00863529	chrIII	2850988	2855411	minus
WBGene00016132	93	128	94	1876	45	334	47.9196	149.622	134.121	1101.6	65.3623	432.811	321.906	110.554	533.258	4.8235	2.27008	0.000271857	0.00880575	chrX	5340289	5341977	plus
WBGene00011315	188	138	108	1320	42	180	96.8698	161.311	154.096	775.113	61.0048	233.251	246.941	137.426	356.456	2.59381	1.37507	0.000274921	0.00888928	chrX	10719486	10721990	minus
WBGene00007883	905	653	546	5816	172	903	466.315	763.306	779.043	3415.2	249.829	1170.14	1140.64	669.554	1611.72	2.40716	1.26733	0.000277204	0.00894729	chrIV	9510038	9510577	minus
WBGene00006085	90	52	64	539	46	185	46.3738	60.7839	91.3164	316.505	66.8148	239.73	136.921	66.158	207.683	3.1392	1.6504	0.000278359	0.00896875	chrV	15740508	15741932	minus
WBGene00004401	338	158	198	2172	42	284	174.16	184.69	282.51	1275.41	61.0048	368.019	390.966	213.786	568.146	2.65754	1.41009	0.000280349	0.00901698	chrIII	9592198	9595490	minus
WBGene00020855	2028	1308	1122	5651	1914	1984	1044.96	1528.95	1600.89	3318.31	2780.08	2570.95	2140.69	1391.6	2889.78	2.07659	1.05421	0.000281526	0.00903895	chrV	3727247	3731755	minus
WBGene00015672	115	57	34	123	286	156	59.2555	66.6285	48.5118	72.2265	415.414	202.151	144.031	58.1319	229.93	3.95532	1.98379	0.000290061	0.00924809	chrX	16763636	16766583	plus
WBGene00003485	1386	781	596	6147	290	868	714.157	912.928	850.384	3609.56	421.224	1124.79	1272.17	825.823	1718.52	2.08098	1.05727	0.000299005	0.00948368	chrX	16262222	16265614	minus
WBGene00018590	114	52	60	798	25	131	58.7402	60.7839	85.6091	468.591	36.3124	169.755	146.632	68.3777	224.886	3.28888	1.7176	0.000299854	0.00949417	chrX	2163376	2164063	plus
WBGene00007802	183	131	97	1096	89	179	94.2935	153.129	138.401	643.579	129.272	231.955	231.772	128.608	334.935	2.60432	1.3809	0.000307456	0.0096846	chrIV	11878526	11883384	plus
WBGene00009326	231	142	128	1364	55	232	119.026	165.987	182.633	800.95	79.8872	300.635	274.853	155.882	393.824	2.52643	1.3371	0.000313715	0.00984786	chrV	10880818	10883292	plus
WBGene00045277	390	231	236	1646	171	464	200.953	270.021	336.729	966.543	248.377	601.27	437.315	269.234	605.396	2.24858	1.16902	0.000318319	0.00997528	chrV	7813717	7814926	minus
WBGene00017842	1687	945	950	8374	344	1234	869.252	1104.63	1355.48	4917.27	499.658	1599.07	1724.23	1109.79	2338.67	2.10731	1.0754	0.000320063	0.0100075	chrII	4775291	4781343	minus
WBGene00009547	312	184	178	1309	248	257	160.763	215.082	253.974	768.654	360.219	333.031	348.62	209.939	487.301	2.32115	1.21484	0.000325113	0.0101189	chrIV	11844424	11846327	plus
WBGene00000903	321	376	506	8667	539	2229	165.4	439.514	721.97	5089.32	782.895	2888.43	1681.26	442.295	2920.22	6.60242	2.72299	0.000330811	0.0102787	chrIII	811822	813758	plus
WBGene00003746	218	231	184	3048	73	398	112.328	270.021	262.535	1789.81	106.032	515.744	509.411	214.961	803.861	3.73957	1.90287	0.000331825	0.0102928	chrI	7800447	7801817	minus
WBGene00011077	78	59	60	710	24	111	40.1907	68.9664	85.6091	416.917	34.8599	143.838	131.73	64.922	198.538	3.0581	1.61264	0.000334848	0.0103689	chrX	9864011	9866500	plus
WBGene00018514	85	61	80	1548	36	67	43.7975	71.3042	114.145	908.997	52.2898	86.8213	212.892	76.4157	349.369	4.57195	2.19281	0.000336764	0.0104107	chrX	5791668	5797145	plus
WBGene00019261	661	497	431	4024	418	674	340.59	580.954	614.959	2362.92	607.143	873.396	896.661	512.168	1281.15	2.50143	1.32276	0.000339688	0.0104657	chrIII	2842036	2845189	plus
WBGene00019480	314	177	160	1907	41	222	161.793	206.899	228.291	1119.8	59.5523	287.676	344.003	198.994	489.011	2.45741	1.29714	0.000342475	0.0105338	chrV	8215543	8217749	minus
WBGene00013662	59	43	74	1759	45	238	30.4006	50.2636	105.585	1032.9	65.3623	308.41	265.486	62.0829	468.89	7.55264	2.91698	0.000343773	0.010556	chrIV	16142512	16147123	minus
WBGene00016596	30	110	94	4496	11	258	15.4579	128.581	134.121	2640.08	15.9774	334.327	544.758	92.7201	996.796	10.7506	3.42634	0.000345904	0.0106037	chrIV	7179227	7180402	plus
WBGene00000136	274	207	148	1915	41	177	141.183	241.967	211.169	1124.5	59.5523	229.364	334.623	198.106	471.139	2.37822	1.24988	0.000347547	0.0106362	chrX	4565276	4569534	plus
WBGene00006767	2361	997	831	7171	1070	1339	1216.54	1165.41	1185.69	4210.86	1554.17	1735.13	1844.63	1189.21	2500.05	2.10227	1.07195	0.000357086	0.0108736	chrIV	12773838	12787489	plus
WBGene00018783	182	112	144	341	508	624	93.7782	130.919	205.462	200.238	737.868	808.604	362.811	143.386	582.236	4.06061	2.0217	0.000358797	0.0109068	chrII	2220005	2223545	minus
WBGene00019593	60	71	41	675	47	178	30.9159	82.9934	58.4995	396.365	68.2673	230.66	144.617	57.4696	231.764	4.03281	2.01178	0.000359757	0.0109068	chrII	2287291	2290082	minus
WBGene00007344	73	32	67	2032	27	45	37.6143	37.4055	95.5968	1193.2	39.2174	58.3128	243.559	56.8722	430.245	7.56512	2.91936	0.000359965	0.0109068	chrX	12938627	12940641	minus
WBGene00004779	207	92	134	1148	213	244	106.66	107.541	191.194	674.114	309.381	316.185	284.179	135.131	433.227	3.20597	1.68076	0.000370091	0.0111726	chrIII	1723185	1733094	minus
WBGene00001705	613	484	471	5444	190	974	315.857	565.758	672.031	3196.76	275.974	1262.15	1048.09	517.882	1578.29	3.04759	1.60767	0.000373583	0.0112265	chrIV	2476699	2480217	plus
WBGene00008076	821	455	328	3849	127	534	423.033	531.859	467.996	2260.16	184.467	691.979	759.916	474.296	1045.54	2.20439	1.14038	0.000383399	0.011465	chrIV	10578647	10581765	plus
WBGene00001691	78	69	85	1909	27	54	40.1907	80.6556	121.28	1120.98	39.2174	69.9754	245.383	80.7086	410.057	5.08071	2.34503	0.000385533	0.01151	chrV	20609832	20613753	plus
WBGene00003531	171	61	106	1695	55	143	88.1103	71.3042	151.243	995.316	79.8872	185.305	261.861	103.552	420.169	4.05755	2.02061	0.000391142	0.0116206	chrIV	10224032	10226293	plus
WBGene00012323	357	236	224	917	281	709	183.95	275.865	319.607	538.469	408.151	918.751	440.799	259.807	621.79	2.39327	1.25899	0.000393897	0.0116731	chrII	9158047	9159813	plus
WBGene00016033	3810	2159	2160	18732	758	2907	1963.16	2523.7	3081.93	10999.6	1100.99	3767.01	3906.06	2522.93	5289.19	2.09645	1.06795	0.000394539	0.0116731	chrX	8997424	8998854	plus
WBGene00009218	7529	4486	4517	35542	3598	6429	3879.43	5243.78	6444.94	20870.5	5226.08	8330.96	8332.62	5189.38	11475.8	2.21141	1.14497	0.000397325	0.0117281	chrIV	12392091	12398682	minus
WBGene00012480	291	79	68	369	391	284	149.942	92.3448	97.0236	216.679	567.926	368.019	248.656	113.104	384.208	3.39696	1.76424	0.000398866	0.011737	chrI	12859489	12861283	plus
WBGene00008560	68	71	64	1093	19	107	35.038	82.9934	91.3164	641.817	27.5974	138.655	169.57	69.7826	269.357	3.85994	1.94858	0.000398908	0.011737	chrII	8804782	8806889	minus
WBGene00001612	412	224	295	4012	65	414	212.289	261.838	420.911	2355.87	94.4122	536.478	646.967	298.346	995.588	3.33702	1.73856	0.000430899	0.012458	chrIII	8584106	8588535	minus
WBGene00018951	1111	613	642	5865	181	843	572.459	716.549	916.017	3443.97	262.902	1092.39	1167.38	735.009	1599.75	2.17651	1.12202	0.000441208	0.0127359	chrIII	7313079	7315187	minus
WBGene00000084	138	50	67	809	36	143	71.1066	58.4461	95.5968	475.051	52.2898	185.305	156.299	75.0498	237.548	3.16521	1.6623	0.000451182	0.0129828	chrI	7602307	7608241	plus
WBGene00010632	335	181	146	1558	92	307	172.614	211.575	208.315	914.869	133.63	397.823	339.804	197.501	482.107	2.44103	1.28749	0.000453896	0.0130404	chrV	10346639	10350129	minus
WBGene00013760	193	58	36	97	440	151	99.4461	67.7974	51.3655	56.9591	639.098	195.672	185.056	72.8697	297.243	4.0791	2.02825	0.000454916	0.0130492	chrV	20206287	20207876	plus
WBGene00008963	225	231	169	1190	502	555	115.935	270.021	241.132	698.776	729.153	719.191	462.368	209.029	715.707	3.42395	1.77566	0.000457435	0.013101	chrII	14604070	14605564	minus
WBGene00019550	81	30	58	1106	35	75	41.7365	35.0676	82.7555	649.451	50.8373	97.188	159.506	53.1865	265.825	4.99799	2.32135	0.000466077	0.0133276	chrX	3282599	3285711	plus
WBGene00002259	797	336	335	4083	74	315	410.666	392.758	477.984	2397.57	107.485	408.19	699.108	427.136	971.08	2.27347	1.1849	0.000466926	0.0133311	chrV	13879536	13880200	plus
WBGene00000771	612	209	155	146	936	572	315.342	244.305	221.157	85.7322	1359.54	741.22	494.549	260.268	728.829	2.8003	1.48558	0.000469194	0.013375	chrII	6192804	6195175	plus
WBGene00010424	107	87	53	660	98	113	55.1334	101.696	75.6214	387.557	142.345	146.43	151.464	77.4836	225.444	2.90957	1.5408	0.000474222	0.0134973	chrX	12652517	12653452	minus
WBGene00011878	78	58	68	672	45	190	40.1907	67.7974	97.0236	394.603	65.3623	246.21	151.864	68.3373	235.392	3.44456	1.78432	0.000477876	0.0135696	chrII	12497146	12502814	minus
WBGene00011678	123	57	64	922	30	86	63.3776	66.6285	91.3164	541.405	43.5749	111.442	152.957	73.7742	232.141	3.14664	1.65381	0.000478248	0.0135696	chrII	9775076	9775824	minus
WBGene00011803	1481	1304	1196	12399	507	3371	763.107	1524.27	1706.47	7280.78	736.415	4368.28	2729.89	1331.29	4128.49	3.10113	1.63279	0.00047928	0.0135779	chrIII	10040090	10049690	minus
WBGene00006915	2123	1391	1556	19681	492	1977	1093.91	1625.97	2220.13	11556.8	714.628	2561.88	3295.56	1646.67	4944.44	3.00269	1.58626	0.000481114	0.0135966	chrII	11435147	11438400	minus
WBGene00013896	338	243	197	1746	82	374	174.16	284.048	281.083	1025.26	119.105	484.644	394.717	246.43	543.004	2.20348	1.13978	0.000484966	0.0136755	chrV	12808406	12810054	minus
WBGene00013715	155	39	88	1711	35	195	79.8661	45.5879	125.56	1004.71	50.8373	252.689	259.875	83.6713	436.079	5.21181	2.38178	0.000487781	0.0137037	chrI	10319660	10321484	minus
WBGene00016328	340	226	159	1868	67	276	175.19	264.176	226.864	1096.9	97.3172	357.652	369.684	222.077	517.291	2.32933	1.21992	0.000488214	0.0137037	chrI	5196081	5199939	plus
WBGene00043054	80	75	39	468	121	139	41.2212	87.6691	55.6459	274.813	175.752	180.122	135.87	61.5121	210.229	3.41768	1.77302	0.000492176	0.0137938	chrII	12490140	12491751	plus
WBGene00000750	170	93	119	1413	41	176	87.595	108.71	169.791	829.724	59.5523	228.068	247.24	122.032	372.448	3.05205	1.60978	0.0004999	0.0139476	chrX	10999676	11001786	minus
WBGene00006752	2271	1414	1630	18050	608	2757	1170.17	1652.85	2325.71	10599.1	883.117	3572.63	3367.26	1716.25	5018.28	2.92399	1.54794	0.000501463	0.0139476	chrI	7422781	7454098	plus
WBGene00019411	167	104	122	1155	74	240	86.0493	121.568	174.072	678.224	107.485	311.002	246.4	127.23	365.57	2.87331	1.52271	0.000501478	0.0139476	chrII	5804697	5805455	minus
WBGene00011757	285	202	247	3609	102	375	146.851	236.122	352.424	2119.23	148.154	485.94	581.454	245.132	917.775	3.744	1.90458	0.00050326	0.013976	chrII	8520860	8523420	plus
WBGene00016114	424	325	346	3006	356	756	218.472	379.899	493.679	1765.14	517.088	979.655	725.656	364.017	1087.3	2.98694	1.57867	0.000516173	0.0142498	chrII	5680971	5682651	plus
WBGene00015668	89	49	55	211	166	184	45.8586	57.2771	78.475	123.901	241.114	238.435	130.843	60.5369	201.15	3.32276	1.73238	0.000519277	0.0143122	chrX	7413566	7415475	minus
WBGene00017499	1064	422	270	2904	391	849	548.242	493.285	385.241	1705.25	567.926	1100.17	800.018	475.589	1124.45	2.36433	1.24143	0.00052251	0.0143796	chrV	2330428	2330929	plus
WBGene00021116	566	244	171	1304	367	573	291.64	285.217	243.986	765.718	533.066	742.516	477.024	273.614	680.433	2.48683	1.31431	0.000539352	0.0147324	chrII	3525153	3528519	minus
WBGene00014094	224	172	162	2173	32	160	115.419	201.054	231.145	1276	46.4798	207.334	346.239	182.539	509.938	2.79358	1.48211	0.000544576	0.0148087	chrIV	11943302	11945698	minus
WBGene00021799	159	159	171	1572	413	425	81.9271	185.859	243.986	923.09	599.88	550.732	430.912	170.591	691.234	4.05201	2.01864	0.000551898	0.0149634	chrIII	3233093	3241288	plus
WBGene00003889	121	65	100	858	255	217	62.3471	75.9799	142.682	503.824	370.386	281.197	239.403	93.6696	385.136	4.11164	2.03971	0.000556189	0.015013	chrIV	3550884	3557427	minus
WBGene00008277	597	386	426	4794	291	460	307.613	451.204	607.825	2815.07	422.676	596.086	866.746	455.547	1277.94	2.8053	1.48815	0.000558389	0.015041	chrIV	8993071	9000758	plus
WBGene00020917	209	21	64	2643	90	236	107.69	24.5473	91.3164	1551.99	130.725	305.818	368.681	74.518	662.844	8.89508	3.15301	0.000559693	0.015041	chrI	3293170	3294360	minus
WBGene00006669	239	146	151	1165	190	158	123.148	170.663	215.45	684.096	275.974	204.743	279.012	169.753	388.271	2.28726	1.19362	0.000561717	0.0150557	chrV	12387020	12395687	minus
WBGene00006980	303	201	247	1937	182	782	156.125	234.953	352.424	1137.42	264.354	1013.35	526.437	247.834	805.04	3.2483	1.69969	0.000563106	0.0150557	chrX	7930690	7931760	plus
WBGene00009375	1110	732	704	4697	626	1399	571.944	855.65	1004.48	2758.11	909.262	1812.88	1318.72	810.692	1826.75	2.25332	1.17206	0.000563999	0.0150557	chrIII	3747542	3759394	minus
WBGene00011439	611	378	239	2831	102	465	314.827	441.852	341.01	1662.38	148.154	602.566	585.132	365.896	804.368	2.19835	1.13642	0.000565257	0.0150579	chrV	11761873	11763049	minus
WBGene00004921	376	174	265	4157	43	314	193.74	203.392	378.107	2441.02	62.4573	406.894	614.268	258.413	970.124	3.75416	1.90849	0.000570049	0.0151476	chrII	6810920	6816411	plus
WBGene00020069	148	124	149	2311	115	219	76.2592	144.946	212.596	1357.04	167.037	283.789	373.61	144.6	602.621	4.16749	2.05918	0.000577989	0.0152646	chrIV	6846083	6859340	minus
WBGene00012273	121	114	80	606	182	227	62.3471	133.257	114.145	355.848	264.354	294.156	204.018	103.25	304.786	2.95192	1.56166	0.000579109	0.0152713	chrIII	10988034	10991820	plus
WBGene00011836	916	487	521	3432	370	848	471.983	569.265	743.372	2015.29	537.423	1098.87	906.035	594.873	1217.2	2.04614	1.03291	0.000589721	0.0154399	chrV	11248128	11250848	plus
WBGene00001133	109	51	68	649	54	131	56.1639	59.615	97.0236	381.097	78.4347	169.755	140.348	70.9342	209.762	2.95714	1.5642	0.000592997	0.0154814	chrII	14166807	14171573	minus
WBGene00010344	79	52	43	649	20	96	40.7059	60.7839	61.3532	381.097	29.0499	124.401	116.232	54.281	178.183	3.2826	1.71484	0.000597845	0.0155635	chrX	10546000	10548900	plus
WBGene00011551	75	59	59	582	22	138	38.6449	68.9664	84.1823	341.755	31.9549	178.826	124.055	63.9312	184.178	2.88089	1.52651	0.000601645	0.0156402	chrI	12722034	12722873	minus
WBGene00013481	579	188	177	1374	477	364	298.338	219.757	252.547	806.823	692.84	471.686	456.998	256.881	657.116	2.55806	1.35505	0.000611183	0.0158431	chrV	18656071	18664090	minus
WBGene00016152	464	225	195	1372	363	365	239.083	263.007	278.23	805.648	527.256	472.982	431.034	260.107	601.962	2.31429	1.21057	0.000614919	0.0159175	chrII	5056220	5060704	minus
WBGene00044623	5550	4122	4404	55122	1470	6912	2859.72	4818.29	6283.71	32368	2135.17	8956.85	9570.29	4653.91	14486.7	3.1128	1.63821	0.000619234	0.0160065	chrX	5492944	5496252	plus
WBGene00018641	444	256	286	2650	172	382	228.778	299.244	408.07	1556.1	249.829	495.011	539.505	312.031	766.98	2.45803	1.2975	0.000620159	0.0160078	chrX	5875863	5881681	plus
WBGene00008958	161	94	35	243	412	185	82.9577	109.879	49.9386	142.691	598.428	239.73	203.937	80.925	326.95	4.04016	2.01441	0.000621325	0.0160153	chrX	12368384	12371353	minus
WBGene00019744	301	87	72	357	347	345	155.095	101.696	102.731	209.633	504.016	447.065	253.373	119.841	386.905	3.22849	1.69086	0.000628446	0.0161534	chrV	449742	450442	plus
WBGene00011949	90	58	89	1442	72	161	46.3738	67.7974	126.987	846.753	104.58	208.63	233.52	80.386	386.654	4.80997	2.26603	0.000631416	0.0162069	chrIV	12719937	12720871	plus
WBGene00003748	75	79	80	1322	22	151	38.6449	92.3448	114.145	776.288	31.9549	195.672	208.175	81.7117	334.638	4.09535	2.03399	0.00063569	0.0162938	chrIII	3933580	3935888	minus
WBGene00001119	1277	577	524	3210	751	1019	657.993	674.468	747.653	1884.93	1090.82	1320.46	1062.72	693.371	1432.07	2.06538	1.04641	0.000642829	0.0164337	chrIV	3396578	3399120	minus
WBGene00021872	699	543	426	2849	478	1054	360.17	634.724	607.825	1672.95	694.293	1365.82	889.297	534.24	1244.35	2.3292	1.21984	0.000651435	0.0166043	chrIV	2854344	2855454	plus
WBGene00010505	44	34	63	2227	6	44	22.6717	39.7433	89.8896	1307.71	8.71497	57.017	254.291	50.7682	457.814	9.01774	3.17277	0.000658295	0.0167558	chrX	13708652	13711895	minus
WBGene00022611	1312	1055	983	12110	342	1414	676.028	1233.21	1402.56	7111.08	496.753	1832.32	2125.33	1103.93	3146.72	2.85046	1.51119	0.000670327	0.0170384	chrX	5024389	5028107	plus
WBGene00019263	377	209	183	2042	55	254	194.255	244.305	261.108	1199.08	79.8872	329.143	384.629	233.222	536.036	2.29839	1.20062	0.000676329	0.0171423	chrIV	5725589	5729716	plus
WBGene00008558	287	103	104	1327	62	217	147.881	120.399	148.389	779.224	90.0547	281.197	261.191	138.89	383.492	2.76113	1.46526	0.000677086	0.0171423	chrII	8792857	8794107	minus
WBGene00006525	117	72	94	812	170	152	60.286	84.1623	134.121	476.812	246.924	196.968	199.879	92.8564	306.901	3.30512	1.7247	0.000677225	0.0171423	chrI	9020938	9025546	plus
WBGene00012387	563	308	263	2206	177	482	290.094	360.028	375.253	1295.38	257.092	624.595	533.74	341.792	725.688	2.12319	1.08623	0.000695328	0.0175037	chrI	13695685	13702942	minus
WBGene00044724	217	667	647	18207	225	2932	111.813	779.671	923.151	10691.3	326.811	3799.4	2772.02	604.878	4939.16	8.16555	3.02955	0.00069795	0.0175456	chrX	4101678	4102101	minus
WBGene00012404	860	417	356	317	1468	674	443.128	487.44	507.947	186.145	2132.26	873.396	771.72	479.505	1063.93	2.21882	1.14979	0.00070413	0.0176767	chrV	17594323	17598904	minus
WBGene00015227	190	93	74	944	45	199	97.9003	108.71	105.585	554.324	65.3623	257.872	198.292	104.065	292.519	2.81093	1.49105	0.000705335	0.0176827	chrV	8758798	8760494	minus
WBGene00013891	378	337	388	6873	99	481	194.77	393.927	553.605	4035.87	143.797	623.299	990.879	380.767	1600.99	4.20464	2.07198	0.000709132	0.0177051	chrI	10333541	10335730	minus
WBGene00006832	476	232	306	3965	65	251	245.266	271.19	436.606	2328.28	94.4122	325.256	616.834	317.687	915.981	2.88328	1.52771	0.00071501	0.0178275	chrII	8117144	8122852	plus
WBGene00003168	110	44	57	782	31	82	56.6791	51.4325	81.3286	459.196	45.0273	106.259	133.32	63.1468	203.494	3.22256	1.68821	0.000716167	0.0178321	chrX	16803295	16807052	minus
WBGene00021480	702	489	372	1927	693	635	361.716	571.603	530.776	1131.55	1006.58	822.858	737.513	488.032	986.995	2.0224	1.01607	0.000741133	0.01833	chrV	3733130	3739385	minus
WBGene00003232	179	113	138	1830	22	176	92.2324	132.088	196.901	1074.59	31.9549	228.068	292.639	140.407	444.871	3.16843	1.66377	0.000741171	0.01833	chrX	9968571	9974344	minus
WBGene00020654	366	192	142	1644	119	262	188.587	224.433	202.608	965.368	172.847	339.51	348.892	205.209	492.575	2.40035	1.26325	0.000743756	0.0183691	chrI	4409690	4419306	plus
WBGene00019868	678	434	496	5848	200	597	349.35	507.312	707.702	3433.99	290.499	773.616	1010.41	521.454	1499.37	2.87536	1.52374	0.000749655	0.0184154	chrX	2473756	2476006	minus
WBGene00001695	208	119	144	686	295	336	107.175	139.102	205.462	402.824	428.486	435.402	286.408	150.58	422.237	2.80408	1.48753	0.000775718	0.0189286	chrV	9221867	9224326	plus
WBGene00007695	432	237	234	2063	40	407	222.594	277.034	333.875	1211.41	58.0998	527.407	438.403	277.835	598.972	2.15586	1.10826	0.000782213	0.0190363	chrX	12222851	12226008	plus
WBGene00009843	632	291	259	2787	76	438	325.647	340.156	369.546	1636.55	110.39	567.578	558.311	345.117	771.505	2.23549	1.16059	0.00078407	0.0190561	chrX	11451973	11454130	minus
WBGene00017180	136	49	32	281	154	202	70.076	57.2771	45.6582	165.005	223.684	261.76	137.243	57.6705	216.816	3.75957	1.91057	0.000788061	0.0191024	chrII	3262833	3264287	plus
WBGene00002126	234	215	203	2607	83	368	120.572	251.318	289.644	1530.85	120.557	476.869	464.968	220.511	709.425	3.21718	1.6858	0.000798707	0.0192838	chrV	7961298	7965809	minus
WBGene00013198	1902	734	487	3104	1348	1491	980.034	857.988	694.86	1822.69	1957.96	1932.1	1374.27	844.294	1904.25	2.25543	1.17341	0.000806613	0.0193752	chrI	14694159	14700338	plus
WBGene00004740	338	178	138	852	408	242	174.16	208.068	196.901	500.3	592.618	313.593	330.94	193.043	468.837	2.42867	1.28017	0.000808469	0.0193752	chrV	6633252	6639641	plus
WBGene00019518	328	239	206	1419	305	289	169.007	279.372	293.925	833.247	443.011	374.498	398.843	247.435	550.252	2.22383	1.15305	0.00080869	0.0193752	chrX	16558371	16562236	plus
WBGene00021039	396	171	96	520	467	397	204.045	199.886	136.975	305.348	678.315	514.448	339.836	180.302	499.37	2.76964	1.4697	0.000810092	0.0193797	chrI	3352465	3359435	plus
WBGene00010901	397	245	288	3199	113	400	204.56	286.386	410.924	1878.48	164.132	518.336	577.136	300.623	853.648	2.83959	1.50568	0.000831598	0.0197789	chrII	10647455	10648617	plus
WBGene00012383	384	502	665	17872	140	1085	197.862	586.799	948.834	10494.6	203.349	1405.99	2306.23	577.831	4034.63	6.98237	2.80372	0.000897434	0.0211376	chrIV	11065985	11067051	minus
WBGene00018899	535	340	328	2618	180	476	275.667	397.433	467.996	1537.31	261.449	616.82	592.779	380.365	805.192	2.11689	1.08195	0.000934088	0.0218883	chrIV	7491760	7493746	plus
WBGene00010592	174	68	100	1080	49	130	89.6561	79.4867	142.682	634.184	71.1723	168.459	197.607	103.942	291.272	2.80226	1.48659	0.000948663	0.0221477	chrV	9485741	9489009	plus
WBGene00003402	232	100	148	1819	59	176	119.541	116.892	211.169	1068.13	85.6972	228.068	304.916	149.201	460.632	3.08732	1.62636	0.000948788	0.0221477	chrII	5104109	5108892	plus
WBGene00018381	366	261	190	275	548	592	188.587	305.088	271.095	161.482	795.967	767.137	414.893	254.924	574.862	2.25504	1.17315	0.000952314	0.0221836	chrII	2347020	2350035	plus
WBGene00000176	193	119	133	1531	35	122	99.4461	139.102	189.767	899.014	50.8373	158.092	256.043	142.772	369.315	2.58675	1.37114	0.000952752	0.0221836	chrX	4702935	4704939	minus
WBGene00045411	120	98	88	717	48	218	61.8318	114.554	125.56	421.027	69.7198	282.493	179.198	100.649	257.747	2.56086	1.35663	0.000954378	0.0221932	chrV	19432416	19433129	minus
WBGene00019914	333	123	115	1488	59	236	171.583	143.777	164.084	873.764	85.6972	305.818	290.787	159.815	421.76	2.63905	1.40002	0.000959853	0.022264	chrIII	1002696	1006236	plus
WBGene00008040	361	265	217	2019	88	337	186.011	309.764	309.62	1185.57	127.82	436.698	425.914	268.465	583.363	2.17296	1.11966	0.000975431	0.0225112	chrIII	9330231	9330844	plus
WBGene00022064	105	42	48	46	286	127	54.1028	49.0947	68.4873	27.0115	415.414	164.572	129.78	57.2283	202.332	3.53553	1.82193	0.000979323	0.0225447	chrIV	3202355	3203858	plus
WBGene00022435	1431	656	541	2883	1025	1143	737.344	766.812	771.909	1692.92	1488.81	1481.15	1156.49	758.688	1554.29	2.04865	1.03468	0.000980581	0.0225447	chrV	163842	172211	minus
WBGene00007746	903	508	567	5734	95	684	465.284	593.812	809.006	3367.05	137.987	886.355	1043.25	622.701	1463.8	2.35072	1.2331	0.000987506	0.0226755	chrII	8350485	8354652	minus
WBGene00018581	268	166	187	1925	54	265	138.091	194.041	266.815	1130.37	78.4347	343.398	358.525	199.649	517.402	2.59156	1.37382	0.00102456	0.0234088	chrI	6594345	6596079	plus
WBGene00009579	401	167	164	1994	65	207	206.621	195.21	233.998	1170.89	94.4122	268.239	361.562	211.943	511.181	2.41188	1.27016	0.00103072	0.0235201	chrII	11142693	11150323	plus
WBGene00016862	42	97	84	1289	68	386	21.6411	113.385	119.853	756.91	98.7697	500.194	268.459	84.9597	451.958	5.31967	2.41134	0.00104181	0.0237437	chrV	5229989	5233872	minus
WBGene00006811	1546	926	996	8666	516	1385	796.6	1082.42	1421.11	5088.74	749.487	1794.74	1822.18	1100.04	2544.32	2.31293	1.20972	0.00104366	0.0237562	chrIII	4066692	4082770	plus
WBGene00013539	190	139	96	896	100	209	97.9003	162.48	136.975	526.138	145.25	270.831	223.262	132.452	314.073	2.37122	1.24563	0.00104987	0.023868	chrIV	15532465	15539907	minus
WBGene00007431	165	65	85	1075	18	104	85.0187	75.9799	121.28	631.248	26.1449	134.767	179.073	94.0927	264.053	2.80631	1.48867	0.00105246	0.0238971	chrV	10107764	10109873	plus
WBGene00017792	105	54	44	755	9	96	54.1028	63.1218	62.78	443.341	13.0725	124.401	126.803	60.0015	193.605	3.22666	1.69004	0.0010574	0.02395	chrV	7438303	7439914	plus
WBGene00001373	112	70	34	849	12	75	57.7097	81.8245	48.5118	498.539	17.4299	97.188	133.534	62.682	204.386	3.26067	1.70517	0.00106581	0.0240477	chrII	6156986	6160993	minus
WBGene00003762	1079	405	352	3695	346	546	555.971	473.413	502.24	2169.73	502.563	707.529	818.574	510.541	1126.61	2.20669	1.14189	0.00106698	0.0240477	chrV	11616265	11616869	plus
WBGene00020009	1455	1049	1083	7491	1191	2134	749.711	1226.2	1545.24	4398.77	1729.92	2765.32	2069.19	1173.72	2964.67	2.52588	1.33679	0.00109638	0.0246551	chrII	4068353	4072945	plus
WBGene00019958	224	192	156	1479	73	340	115.419	224.433	222.584	868.479	106.032	440.586	329.589	187.479	471.699	2.51601	1.33114	0.00109662	0.0246551	chrX	4822629	4824650	plus
WBGene00001517	115	58	80	953	15	108	59.2555	67.7974	114.145	559.608	21.7874	139.951	160.424	80.3995	240.449	2.99068	1.58047	0.00110035	0.0247021	chrX	6479601	6484773	minus
WBGene00017969	498	422	379	4598	154	493	256.602	493.285	540.764	2699.98	223.684	638.849	808.86	430.217	1187.5	2.76024	1.4648	0.00110141	0.0247021	chrII	7232812	7235880	plus
WBGene00015231	124	88	110	1581	58	96	63.8929	102.865	156.95	928.374	84.2447	124.401	243.455	107.903	379.007	3.51249	1.81249	0.00110834	0.0248272	chrI	10628732	10631662	plus
WBGene00022287	444	271	327	3790	54	465	228.778	316.778	466.57	2225.51	78.4347	602.566	653.107	337.375	968.838	2.8717	1.5219	0.00111075	0.0248506	chrV	1391163	1392056	minus
WBGene00003100	115	94	82	230	252	208	59.2555	109.879	116.999	135.058	366.029	269.535	176.126	95.3777	256.874	2.69323	1.42933	0.00111418	0.0248968	chrII	9733363	9737952	plus
WBGene00014728	479	199	152	632	423	584	246.812	232.615	216.876	371.115	614.405	756.771	406.432	232.101	580.764	2.5022	1.3232	0.00111842	0.0249612	chrIII	4043093	4047607	minus
WBGene00013574	1751	1000	1074	7544	706	1718	902.229	1168.92	1532.4	4429.89	1025.46	2226.25	1880.86	1201.18	2560.53	2.13168	1.09199	0.00112116	0.0249919	chrIII	13527337	13539851	plus
WBGene00011289	56	73	57	1096	6	86	28.8548	85.3313	81.3286	643.579	8.71497	111.442	159.875	65.1716	254.579	3.90628	1.9658	0.001132	0.0251851	chrIV	10687573	10688118	plus
WBGene00001753	1081	1103	1196	4704	1200	8630	557.001	1289.32	1706.47	2762.22	1742.99	11183.1	3206.85	1184.27	5229.44	4.41577	2.14266	0.00113396	0.0251851	chrII	10950290	10951546	plus
WBGene00009318	1057	694	660	4098	681	1097	544.635	811.231	941.7	2406.37	989.149	1421.54	1185.77	765.856	1605.69	2.09659	1.06805	0.00113756	0.0252345	chrI	11501615	11507120	plus
WBGene00008515	627	459	351	3352	111	554	323.071	536.535	500.813	1968.32	161.227	717.895	701.31	453.473	949.147	2.09306	1.06561	0.00114001	0.0252391	chrX	13402024	13406347	plus
WBGene00004933	746	403	452	2359	572	824	384.388	471.075	644.922	1385.22	830.827	1067.77	797.368	500.128	1094.61	2.18865	1.13004	0.00114053	0.0252391	chrIII	9496927	9500120	minus
WBGene00018646	159	106	137	722	87	674	81.9271	123.906	195.474	423.964	126.367	873.396	304.172	133.769	474.576	3.54773	1.82689	0.00114316	0.0252668	chrIV	4121335	4123062	minus
WBGene00001189	1093	723	764	7290	286	1179	563.185	845.13	1090.09	4280.74	415.414	1527.8	1453.73	832.801	2074.65	2.49117	1.31682	0.00116538	0.0256033	chrIV	10478422	10481824	minus
WBGene00016951	556	293	277	1878	267	452	286.487	342.494	395.229	1102.77	387.816	585.72	516.753	341.403	692.104	2.02723	1.01951	0.0011821	0.0258725	chrIV	5709085	5714486	plus
WBGene00021703	296	87	67	219	449	258	152.518	101.696	95.5968	128.598	652.17	334.327	244.151	116.604	371.698	3.1877	1.67252	0.00118232	0.0258725	chrIII	2082809	2088262	plus
WBGene00015199	88	56	96	1773	76	139	45.3433	65.4596	136.975	1041.12	110.39	180.122	263.235	82.5925	443.877	5.3743	2.42608	0.00119369	0.0260067	chrII	3040943	3043409	minus
WBGene00020599	456	288	260	2471	85	256	234.961	336.649	370.973	1450.99	123.462	331.735	474.795	314.194	635.395	2.0223	1.016	0.00120266	0.026137	chrIII	2899326	2900394	minus
WBGene00021446	335	148	144	1799	86	119	172.614	173	205.462	1056.39	124.915	154.205	314.43	183.692	445.168	2.42345	1.27706	0.00120395	0.026137	chrIII	1855381	1858875	plus
WBGene00003173	135	82	115	1402	65	187	69.5608	95.8516	164.084	823.264	94.4122	242.322	248.249	109.832	386.666	3.52052	1.81579	0.00122096	0.0264434	chrV	9907608	9915063	minus
WBGene00020439	471	218	104	268	831	365	242.69	254.825	148.389	157.372	1207.02	472.982	413.88	215.301	612.459	2.84466	1.50826	0.00123613	0.0266773	chrIII	6233578	6239284	minus
WBGene00020884	237	224	248	4189	45	261	122.118	261.838	353.851	2459.81	65.3623	338.214	600.199	245.936	954.462	3.88094	1.95641	0.00123942	0.0267169	chrX	6588763	6596100	plus
WBGene00017781	340	151	164	1869	18	192	175.19	176.507	233.998	1097.49	26.1449	248.801	326.355	195.232	457.479	2.34326	1.22852	0.00125024	0.0268238	chrX	811172	813125	minus
WBGene00044686	104	68	105	1238	34	327	53.5876	79.4867	149.816	726.962	49.3848	423.74	247.163	94.2967	400.029	4.24224	2.08483	0.00125871	0.0269424	chrX	10087287	10087899	minus
WBGene00004045	637	257	216	1507	439	473	328.224	300.413	308.193	884.921	637.645	612.932	512.055	312.276	711.833	2.2795	1.18871	0.00126289	0.0269642	chrIII	365948	377557	plus
WBGene00015622	316	259	158	1878	58	384	162.824	302.751	225.437	1102.77	84.2447	497.603	395.939	230.337	561.541	2.43791	1.28564	0.0012651	0.0269642	chrX	6007168	6011275	minus
WBGene00007598	156	341	320	3668	316	1671	80.3813	398.602	456.582	2153.88	458.988	2165.35	952.296	311.855	1592.74	5.1073	2.35256	0.00126563	0.0269642	chrI	7398821	7401020	minus
WBGene00001621	361	236	211	1845	65	302	186.011	275.865	301.059	1083.4	94.4122	391.344	388.681	254.312	523.051	2.05673	1.04035	0.0012686	0.0269866	chrIV	10130344	10133255	plus
WBGene00021710	122	38	44	53	303	113	62.8623	44.419	62.78	31.122	440.106	146.43	131.287	56.6871	205.886	3.63197	1.86075	0.00127148	0.0269872	chrV	710643	712922	minus
WBGene00022744	358	216	151	1891	81	191	184.465	252.487	215.45	1110.41	117.652	247.505	354.661	217.467	491.855	2.26175	1.17744	0.00127261	0.0269872	chrX	4163623	4169767	plus
WBGene00016448	588	207	261	2328	147	347	302.976	241.967	372.4	1367.02	213.517	449.656	491.256	305.781	676.73	2.21312	1.14608	0.00127731	0.0270555	chrIII	4872531	4874715	minus
WBGene00013292	56	52	58	912	9	70	28.8548	60.7839	82.7555	535.533	13.0725	90.7088	135.285	57.4647	213.105	3.70844	1.89081	0.00130434	0.0274796	chrIV	14482307	14486413	plus
WBGene00010575	177	94	94	1066	45	124	91.2019	109.879	134.121	625.963	65.3623	160.684	197.868	111.734	284.003	2.54178	1.34584	0.00131022	0.0275579	chrIII	9361443	9365275	plus
WBGene00013077	59	67	87	1849	37	104	30.4006	78.3177	124.133	1085.75	53.7423	134.767	251.185	77.6172	424.752	5.47239	2.45217	0.00131156	0.0275579	chrV	18555335	18556937	minus
WBGene00044316	37	76	98	3128	16	130	19.0648	88.838	139.828	1836.78	23.2399	168.459	379.369	82.577	676.161	8.18825	3.03355	0.00131781	0.0276575	chrII	6752310	6752908	minus
WBGene00044564	1029	356	405	3969	154	548	530.208	416.136	577.861	2330.62	223.684	710.12	798.106	508.068	1088.14	2.14173	1.09877	0.0013601	0.0283499	chrX	3424803	3427324	plus
WBGene00016218	117	143	153	2220	49	397	60.286	167.156	218.303	1303.6	71.1723	514.448	389.161	148.582	629.74	4.23834	2.0835	0.00140288	0.0291369	chrIII	124774	126532	plus
WBGene00044502	193	88	107	260	271	294	99.4461	102.865	152.67	152.674	393.626	380.977	213.71	118.327	309.092	2.61219	1.38526	0.0014214	0.0293932	chrIV	6010283	6010870	minus
WBGene00009625	149	157	131	1683	31	278	76.7745	183.521	186.913	988.27	45.0273	360.244	306.791	149.069	464.513	3.11609	1.63974	0.0014272	0.0294466	chrX	10312663	10315945	minus
WBGene00008144	581	424	324	2420	139	698	299.369	495.623	462.289	1421.04	201.897	904.496	630.786	419.094	842.478	2.01024	1.00737	0.00143293	0.0295316	chrV	14689139	14691846	plus
WBGene00016517	79	110	42	1181	151	171	40.7059	128.581	59.9264	693.492	219.327	221.589	227.27	76.4046	378.136	4.94912	2.30717	0.00144269	0.0295995	chrV	1509940	1511630	minus
WBGene00013173	450	545	573	10394	83	897	231.869	637.062	817.567	6103.43	120.557	1162.37	1512.14	562.166	2462.12	4.3797	2.13083	0.00145263	0.0297066	chrII	15145872	15151841	plus
WBGene00019972	346	122	108	482	377	346	178.282	142.608	154.096	283.034	547.591	448.361	292.329	158.329	426.328	2.69268	1.42904	0.00145887	0.0297977	chrV	1018338	1022912	minus
WBGene00020560	699	640	683	9265	172	1126	360.17	748.11	974.517	5440.47	249.829	1459.12	1538.7	694.266	2383.14	3.43261	1.7793	0.00146677	0.029859	chrIII	614704	617444	minus
WBGene00006686	141	73	83	230	258	190	72.6524	85.3313	118.426	135.058	374.744	246.21	172.07	92.1365	252.004	2.73511	1.4516	0.00147235	0.0299394	chrV	15704937	15709520	plus
WBGene00017400	144	61	102	597	272	240	74.1982	71.3042	145.535	350.563	395.079	311.002	224.613	97.0126	352.214	3.6306	1.86021	0.00147435	0.0299468	chrX	8639337	8643220	minus
WBGene00044411	124	65	67	821	21	108	63.8929	75.9799	95.5968	482.097	30.5024	139.951	148.003	78.4899	217.517	2.77127	1.47055	0.00148232	0.0300754	chrIII	5823913	5828392	plus
WBGene00004346	234	231	230	2987	115	371	120.572	270.021	328.168	1753.99	167.037	480.757	520.09	239.587	800.594	3.34156	1.74052	0.00148437	0.0300835	chrII	6100033	6110095	plus
WBGene00007495	78	66	77	732	51	190	40.1907	77.1488	109.865	429.836	74.0772	246.21	162.888	75.7348	250.041	3.30153	1.72313	0.00148773	0.0301184	chrIV	8886513	8888589	plus
WBGene00000615	310	122	74	316	417	298	159.732	142.608	105.585	185.557	605.69	386.16	264.222	135.975	392.469	2.88633	1.52924	0.00149414	0.0302094	chrII	8567982	8569037	minus
WBGene00016659	54	95	91	1692	28	236	27.8243	111.048	129.84	993.554	40.6699	305.818	268.126	89.5708	446.681	4.9869	2.31814	0.00149553	0.0302094	chrX	6084704	6085153	plus
WBGene00020148	93	109	153	3768	30	164	47.9196	127.412	218.303	2212.6	43.5749	212.518	477.054	131.212	822.896	6.27151	2.64881	0.00151648	0.0305651	chrII	174402	175644	minus
WBGene00012540	2184	1849	2248	32853	613	3442	1125.34	2161.34	3207.49	19291.5	890.379	4460.28	5189.39	2164.72	8214.06	3.79451	1.92391	0.00154308	0.0309649	chrIV	14042568	14043755	minus
WBGene00019069	74	46	49	560	58	48	38.1296	53.7704	69.9141	328.836	84.2447	62.2003	106.183	53.938	158.427	2.9372	1.55444	0.00154802	0.0310299	chrIV	924936	939667	plus
WBGene00015103	64	85	60	1149	8	98	32.977	99.3583	85.6091	674.701	11.62	126.992	171.876	72.6481	271.104	3.73175	1.89985	0.00156706	0.0313429	chrIII	7110241	7111811	minus
WBGene00011478	66	81	64	146	356	225	34.0075	94.6826	91.3164	85.7322	517.088	291.564	185.732	73.3355	298.128	4.06526	2.02335	0.00158168	0.0315733	chrIII	13580749	13583517	plus
WBGene00011217	91	63	78	1120	30	38	46.8891	73.642	111.292	657.672	43.5749	49.2419	163.719	77.2743	250.163	3.23734	1.69481	0.00159707	0.0318041	chrIII	9785882	9789555	minus
WBGene00016310	70	63	42	439	79	88	36.0685	73.642	59.9264	257.784	114.747	114.034	109.367	56.5457	162.188	2.86827	1.52018	0.00159992	0.0318262	chrII	6344276	6345490	plus
WBGene00004173	118	107	93	851	58	188	60.8013	125.075	132.694	499.713	84.2447	243.618	191.024	106.19	275.859	2.59778	1.37728	0.0016045	0.0318817	chrV	20278622	20279832	minus
WBGene00004256	582	478	576	6489	284	1198	299.884	558.744	821.847	3810.39	412.509	1552.42	1242.63	560.159	1925.1	3.43671	1.78103	0.00162544	0.032194	chrV	8494868	8502139	plus
WBGene00012822	142	66	54	223	256	151	73.1676	77.1488	77.0482	130.947	371.839	195.672	154.304	75.7882	232.819	3.07197	1.61917	0.0016278	0.0322057	chrV	19468354	19469525	plus
WBGene00019665	156	86	77	467	165	194	80.3813	100.527	109.865	274.226	239.662	251.393	176.009	96.9245	255.093	2.63188	1.39609	0.0016303	0.0322204	chrIV	649664	651792	plus
WBGene00003091	152	150	105	946	36	367	78.3203	175.338	149.816	555.498	52.2898	475.573	247.806	134.491	361.12	2.68508	1.42496	0.00166992	0.0328969	chrV	10280285	10281445	minus
WBGene00008215	1295	1030	1220	17497	287	1388	667.268	1203.99	1740.72	10274.4	416.866	1798.63	2683.64	1203.99	4163.28	3.4579	1.7899	0.00167662	0.0329933	chrX	13385991	13387481	minus
WBGene00010268	175	210	276	5911	95	356	90.1714	245.473	393.802	3470.98	137.987	461.319	799.956	243.149	1356.76	5.57997	2.48026	0.00168508	0.0331242	chrII	12938800	12943798	plus
WBGene00011587	1589	635	590	5935	224	815	818.756	742.265	841.823	3485.07	325.359	1056.11	1211.56	800.948	1622.18	2.02533	1.01815	0.00169322	0.0332485	chrV	12859364	12863816	plus
WBGene00019538	547	348	378	3071	303	479	281.85	406.785	539.337	1803.31	440.106	620.707	682.016	409.324	954.709	2.3324	1.22182	0.00170459	0.0334359	chrIV	1707296	1707774	plus
WBGene00023515	476	227	148	478	590	469	245.266	265.345	211.169	280.685	856.972	607.749	411.198	240.593	581.802	2.4182	1.27393	0.0017313	0.0338509	chrV	14465025	14468231	minus
WBGene00008922	1064	460	425	1984	413	1286	548.242	537.704	606.398	1165.02	599.88	1666.45	853.949	564.115	1143.78	2.02757	1.01975	0.00173347	0.0338573	chrV	10937614	10940256	minus
WBGene00009213	213	122	90	418	282	240	109.751	142.608	128.414	245.453	409.604	311.002	224.472	126.924	322.019	2.53709	1.34318	0.00173884	0.0338897	chrIV	12380080	12380833	plus
WBGene00017914	383	232	270	2489	102	409	197.346	271.19	385.241	1461.56	148.154	529.999	498.915	284.592	713.237	2.50617	1.32548	0.00174088	0.0338936	chrII	2748593	2751578	plus
WBGene00001955	879	571	542	1946	1193	859	452.918	667.454	773.336	1142.71	1732.83	1113.13	980.394	631.236	1329.55	2.10627	1.07469	0.00174384	0.0339151	chrIII	9622060	9626465	plus
WBGene00008500	355	213	210	1842	102	202	182.919	248.98	299.632	1081.64	148.154	261.76	370.513	243.844	497.183	2.03894	1.02782	0.00177628	0.0344362	chrII	14017891	14020871	minus
WBGene00018645	75	103	42	848	88	327	38.6449	120.399	59.9264	497.952	127.82	423.74	211.414	72.99	349.837	4.79294	2.26091	0.00178091	0.0344894	chrIV	4119454	4120391	minus
WBGene00004017	2029	1442	1461	12684	783	2290	1045.47	1685.58	2084.58	7448.13	1137.3	2967.47	2728.09	1605.21	3850.97	2.39904	1.26246	0.00178509	0.0345217	chrII	10134891	10139158	plus
WBGene00015055	1298	547	399	4692	187	724	668.814	639.4	569.3	2755.18	271.617	938.188	973.749	625.838	1321.66	2.11182	1.07849	0.00179295	0.0346125	chrV	9138928	9141375	minus
WBGene00010440	337	98	103	1225	130	184	173.644	114.554	146.962	719.329	188.824	238.435	263.625	145.054	382.196	2.63486	1.39773	0.0017952	0.0346196	chrIV	13250653	13252289	minus
WBGene00006526	269	119	86	1038	103	197	138.606	139.102	122.706	609.521	149.607	255.28	235.804	133.471	338.136	2.5334	1.34107	0.0018054	0.0347066	chrIII	9181472	9185571	plus
WBGene00010049	470	384	373	3114	379	535	242.175	448.866	532.203	1828.56	550.496	693.274	715.929	407.748	1024.11	2.51163	1.32862	0.00184803	0.0353774	chrII	11571737	11572962	plus
WBGene00015376	147	93	89	1128	16	66	75.744	108.71	126.987	662.37	23.2399	85.5254	180.429	103.813	257.045	2.47603	1.30803	0.00185155	0.0354078	chrX	6355549	6357745	plus
WBGene00019640	139	107	98	1035	15	127	71.6218	125.075	139.828	607.759	21.7874	164.572	188.441	112.175	264.706	2.35976	1.23864	0.00188145	0.0357742	chrII	3976276	3977807	plus
WBGene00022626	481	164	170	1942	101	257	247.842	191.703	242.559	1140.36	146.702	333.031	383.699	227.368	540.03	2.37513	1.24801	0.00188157	0.0357742	chrV	8056406	8057561	plus
WBGene00009700	319	242	214	1631	220	269	164.37	282.879	305.339	957.735	319.549	348.581	396.409	250.863	541.955	2.16037	1.11128	0.00188244	0.0357742	chrII	10880868	10882366	plus
WBGene00006583	737	404	488	5170	87	512	379.75	472.244	696.287	3035.86	126.367	663.47	895.663	516.094	1275.23	2.47093	1.30505	0.00188473	0.0357806	chrII	10466792	10468284	plus
WBGene00007687	1083	762	846	9168	245	1151	558.032	890.718	1207.09	5383.51	355.861	1491.51	1647.79	885.279	2410.3	2.72264	1.44501	0.00189403	0.0357828	chrII	8978518	8982616	minus
WBGene00007401	222	117	94	1148	50	157	114.389	136.764	134.121	674.114	72.6248	203.447	222.576	128.425	316.728	2.46626	1.30233	0.00189431	0.0357828	chrIII	9681440	9682745	minus
WBGene00009865	366	170	121	636	413	305	188.587	198.717	172.645	373.464	599.88	395.231	321.421	186.65	456.192	2.44411	1.28931	0.00189463	0.0357828	chrI	14331073	14339827	plus
WBGene00016973	349	151	110	1598	44	212	179.827	176.507	156.95	938.357	63.9098	274.718	298.378	171.095	425.662	2.48787	1.31491	0.00194707	0.0366597	chrII	6528583	6531578	minus
WBGene00020157	87	70	75	760	17	146	44.8281	81.8245	107.011	446.277	24.6924	189.193	148.971	77.888	220.054	2.82526	1.49839	0.00195384	0.0367419	chrV	884882	889275	minus
WBGene00003075	628	420	434	4156	137	547	323.586	490.947	619.239	2440.43	198.992	708.824	797.004	477.924	1116.08	2.33527	1.22359	0.00195545	0.0367419	chrV	12252628	12255375	plus
WBGene00045336	79	52	87	1020	52	237	40.7059	60.7839	124.133	598.951	75.5297	307.114	201.203	75.2077	327.198	4.3506	2.12121	0.00196322	0.0368159	chrV	12724541	12725952	minus
WBGene00019428	158	145	165	2367	40	221	81.4119	169.494	235.425	1389.92	58.0998	286.381	370.122	162.11	578.133	3.5663	1.83443	0.00196542	0.0368159	chrII	6456507	6467610	minus
WBGene00016768	316	115	146	1098	123	265	162.824	134.426	208.315	644.753	178.657	343.398	278.729	168.522	388.936	2.30793	1.2066	0.00197727	0.0369622	chrIV	8645518	8648168	minus
WBGene00001172	2984	2155	2002	10640	2814	3757	1537.55	2519.03	2856.49	6247.88	4087.32	4868.47	3686.12	2304.36	5067.89	2.19927	1.13702	0.00198464	0.0370621	chrV	10169151	10173729	minus
WBGene00017666	762	310	309	2956	123	454	392.632	362.366	440.887	1735.78	178.657	588.311	616.439	398.628	834.251	2.0928	1.06544	0.00199993	0.0372338	chrX	1328864	1329942	minus
WBGene00018266	417	257	258	2150	83	326	214.866	300.413	368.119	1262.5	120.557	422.444	448.149	294.466	601.832	2.04381	1.03126	0.00200646	0.0373173	chrV	2262487	2264540	minus
WBGene00011624	1772	501	413	5098	984	834	913.05	585.63	589.276	2993.58	1429.26	1080.73	1265.25	695.985	1834.52	2.63586	1.39828	0.00202213	0.0375195	chrV	14026321	14027453	minus
WBGene00007806	124	194	280	8741	10	80	63.8929	226.771	399.509	5132.78	14.525	103.667	990.19	230.058	1750.32	7.6082	2.92755	0.00205647	0.0379389	chrV	15347830	15349127	minus
WBGene00012268	158	56	54	283	212	170	81.4119	65.4596	77.0482	166.18	307.929	220.293	153.054	74.6399	231.467	3.10112	1.63279	0.00207681	0.0381987	chrI	11649973	11651903	plus
WBGene00005531	275	152	126	874	113	345	141.698	177.676	179.779	513.219	164.132	447.065	270.595	166.384	374.805	2.25265	1.17162	0.00207916	0.0382035	chrIV	10959056	10961187	plus
WBGene00014029	215	84	53	198	343	202	110.782	98.1894	75.6214	116.267	498.206	261.76	193.471	94.8642	292.077	3.0789	1.62241	0.00208354	0.0382405	chrIII	8924176	8925258	plus
WBGene00021445	117	48	65	762	18	91	60.286	56.1082	92.7432	447.452	26.1449	117.921	133.443	69.7125	197.173	2.82837	1.49997	0.00208535	0.0382405	chrIII	1858904	1859698	plus
WBGene00021543	471	299	300	2238	148	448	242.69	349.508	428.045	1314.17	214.969	580.536	521.653	340.081	703.225	2.06782	1.04811	0.00209766	0.0382978	chrIV	7081501	7082257	plus
WBGene00014073	149	111	88	414	196	206	76.7745	129.75	125.56	243.104	284.689	266.943	187.803	110.695	264.912	2.39317	1.25892	0.00210534	0.0382989	chrIII	9868476	9871021	minus
WBGene00020567	151	97	71	696	69	168	77.805	113.385	101.304	408.696	100.222	217.701	169.852	97.4982	242.206	2.48422	1.31279	0.00210802	0.0382989	chrX	3931750	3937879	plus
WBGene00008559	487	245	340	3043	221	524	250.934	286.386	485.118	1786.87	321.001	679.02	634.888	340.813	928.964	2.72573	1.44664	0.00210946	0.0382989	chrII	8801035	8804827	plus
WBGene00010109	152	135	114	1196	46	179	78.3203	157.804	162.657	702.3	66.8148	231.955	233.309	132.927	333.69	2.51032	1.32787	0.00215751	0.0389011	chrV	11383087	11384268	plus
WBGene00020887	93	99	96	1226	22	179	47.9196	115.723	136.975	719.916	31.9549	231.955	214.074	100.206	327.942	3.27269	1.71047	0.00216019	0.0389111	chrX	6597881	6598829	minus
WBGene00018803	97	72	110	1143	71	295	49.9807	84.1623	156.95	671.178	103.127	382.273	241.278	97.031	385.526	3.97322	1.99031	0.00216997	0.0390105	chrII	3816518	3818240	plus
WBGene00009157	740	292	176	3137	92	254	381.296	341.325	251.12	1842.07	133.63	329.143	546.43	324.58	768.281	2.367	1.24306	0.00221184	0.0396463	chrI	9757870	9760809	minus
WBGene00017320	120	83	71	856	37	77	61.8318	97.0205	101.304	502.649	53.7423	99.7797	152.721	86.7188	218.724	2.52222	1.33469	0.00221805	0.0397187	chrIII	8254904	8257548	plus
WBGene00003745	113	94	114	1280	32	238	58.2249	109.879	162.657	751.625	46.4798	308.41	239.546	110.254	368.838	3.34536	1.74216	0.00222496	0.0398035	chrX	8593143	8593920	plus
WBGene00001990	358	294	273	2612	85	481	184.465	343.663	389.521	1533.78	123.462	623.299	533.033	305.883	760.182	2.4852	1.31336	0.00223109	0.0398741	chrI	8683214	8687103	minus
WBGene00020579	463	373	347	3711	59	499	238.568	436.008	495.106	2179.13	85.6972	646.624	680.188	389.894	970.482	2.48909	1.31562	0.00224186	0.0400276	chrII	6631121	6637066	plus
WBGene00019998	230	137	143	1210	54	189	118.511	160.142	204.035	710.521	78.4347	244.914	252.76	160.896	344.623	2.1419	1.09889	0.00228006	0.0405348	chrII	7494415	7496130	plus
WBGene00022665	2325	1738	2076	25394	620	2707	1197.99	2031.59	2962.07	14911.5	900.547	3507.84	4251.93	2063.88	6439.97	3.12032	1.64169	0.00229764	0.0406313	chrX	7779569	7780556	plus
WBGene00006947	7027	5811	6209	73666	1747	8509	3620.77	6792.6	8859.11	43257.2	2537.51	11026.3	12682.2	6424.16	18940.3	2.9483	1.55988	0.00230532	0.040699	chrII	7531107	7533199	plus
WBGene00045210	96	63	60	787	14	62	49.4654	73.642	85.6091	462.132	20.3349	80.3421	128.588	69.5722	187.603	2.69652	1.4311	0.00230615	0.040699	chrX	7846140	7847410	minus
WBGene00003605	202	172	191	996	298	636	104.084	201.054	272.522	584.858	432.844	824.154	403.253	192.553	613.952	3.18848	1.67287	0.00232505	0.0409009	chrIII	3573572	3578759	plus
WBGene00005638	820	321	261	2658	264	440	422.517	375.224	372.4	1560.8	383.459	570.17	614.094	390.047	838.142	2.14882	1.10355	0.00232653	0.0409009	chrIV	5012541	5014596	plus
WBGene00011856	1480	1206	1127	10885	458	1782	762.592	1409.72	1608.02	6391.75	665.243	2309.19	2191.09	1260.11	3122.06	2.47761	1.30895	0.00234374	0.0410851	chrIV	9328722	9330840	minus
WBGene00019177	53	78	60	697	38	190	27.309	91.1759	85.6091	409.283	55.1948	246.21	152.464	68.0313	236.896	3.48216	1.79998	0.00235272	0.0412027	chrV	3815284	3816528	plus
WBGene00011716	136	73	80	64	275	233	70.076	85.3313	114.145	37.5813	399.436	301.931	168.083	89.8509	246.316	2.74139	1.45491	0.00237364	0.0414503	chrV	11491811	11492572	plus
WBGene00016677	76	36	57	715	14	71	39.1601	42.0812	81.3286	419.853	20.3349	92.0046	115.794	54.19	177.398	3.27362	1.71089	0.00239015	0.0416989	chrIII	5036635	5040366	plus
WBGene00018737	2733	2205	2577	34994	629	2708	1408.22	2577.47	3676.91	20548.7	913.619	3509.13	5439.01	2554.2	8323.83	3.25888	1.70438	0.00240348	0.0418595	chrX	2111772	2113078	minus
WBGene00002038	6123	4051	4112	30232	1746	7308	3154.97	4735.3	5867.08	17752.4	2536.06	9470	7252.64	4585.78	9919.5	2.1631	1.1131	0.00240396	0.0418595	chrIII	4029088	4036816	minus
WBGene00017858	83	78	80	1105	13	84	42.767	91.1759	114.145	648.864	18.8824	108.851	170.781	82.6961	258.866	3.13032	1.64631	0.0024066	0.0418595	chrI	5436801	5443029	minus
WBGene00006614	403	180	180	1565	152	239	207.652	210.406	256.827	918.979	220.779	309.706	354.058	224.962	483.155	2.14772	1.10281	0.00242255	0.0420237	chrIII	8535052	8542671	plus
WBGene00000497	5309	3234	3355	27803	1230	4216	2735.54	3780.29	4786.98	16326.1	1786.57	5463.26	5813.13	3767.6	7858.65	2.08585	1.06063	0.00244689	0.0424057	chrII	203459	211924	plus
WBGene00020657	73	84	77	825	63	141	37.6143	98.1894	109.865	484.446	91.5072	182.713	167.389	81.8896	252.889	3.08817	1.62675	0.00245831	0.0425277	chrX	16711608	16720593	plus
WBGene00010917	108	70	19	947	17	133	55.6486	81.8245	27.1095	556.085	24.6924	172.347	152.951	54.8609	251.041	4.57596	2.19408	0.00245857	0.0425277	chrII	8231263	8232721	plus
WBGene00000501	69	72	54	530	106	49	35.5533	84.1623	77.0482	311.22	153.964	63.4962	120.907	65.5879	176.227	2.68688	1.42593	0.00248028	0.0428223	chrIV	13209250	13214542	minus
WBGene00013085	205	69	82	91	393	186	105.629	80.6556	116.999	53.4358	570.831	241.026	194.763	101.095	288.431	2.85308	1.51252	0.00248887	0.0428897	chrII	9405474	9407055	minus
WBGene00010784	278	100	139	936	163	204	143.244	116.892	198.328	549.626	236.757	264.351	251.533	152.821	350.245	2.29186	1.19652	0.00249529	0.0429599	chrIII	9860643	9863215	plus
WBGene00021701	126	66	78	204	261	137	64.9234	77.1488	111.292	119.79	379.101	177.53	154.964	84.4547	225.474	2.66976	1.41671	0.00250018	0.0429617	chrIII	2111790	2112390	plus
WBGene00016594	158	173	210	2605	70	535	81.4119	202.223	299.632	1529.67	101.675	693.274	484.648	194.422	774.875	3.98552	1.99477	0.00250244	0.0429617	chrIV	7189179	7190319	plus
WBGene00001456	128	52	83	807	34	145	65.9539	60.7839	118.426	473.876	49.3848	187.897	159.387	81.7212	237.053	2.90075	1.53642	0.00250676	0.0429954	chrIV	7696923	7698357	minus
WBGene00022644	65	129	156	3299	45	333	33.4922	150.791	222.584	1937.2	65.3623	431.515	473.49	135.622	811.358	5.98248	2.58074	0.00251221	0.0430084	chrV	411780	414761	minus
WBGene00020929	285	103	104	1341	39	162	146.851	120.399	148.389	787.445	56.6473	209.926	244.943	138.546	351.339	2.5359	1.3425	0.00252586	0.0431211	chrIV	4005471	4007817	minus
WBGene00021439	262	156	172	1361	108	201	134.999	182.352	245.413	799.189	156.869	260.464	296.548	187.588	405.507	2.16169	1.11216	0.00253241	0.0431925	chrIII	2009289	2021579	minus
WBGene00004058	509	288	232	2635	62	196	262.27	336.649	331.022	1547.29	90.0547	253.985	470.212	309.98	630.443	2.03382	1.02419	0.00253746	0.0432383	chrII	6880657	6883710	minus
WBGene00018694	151	176	192	1639	128	622	77.805	205.73	273.949	962.432	185.919	806.012	418.641	185.828	651.455	3.50568	1.8097	0.00256092	0.0435975	chrV	8379486	8383568	plus
WBGene00021635	885	410	294	2241	388	677	456.01	479.258	419.485	1315.93	563.568	877.284	685.256	451.584	918.928	2.0349	1.02496	0.00258556	0.0438946	chrI	3533997	3539159	plus
WBGene00010594	393	271	341	4411	80	330	202.499	316.778	486.545	2590.17	116.2	427.627	689.97	335.274	1044.67	3.11586	1.63963	0.00260043	0.0441061	chrV	9501375	9504554	plus
WBGene00017580	233	111	105	1169	59	140	120.057	129.75	149.816	686.445	85.6972	181.418	225.53	133.208	317.853	2.38615	1.25468	0.00261348	0.0442865	chrX	9235049	9242216	minus
WBGene00010972	816	508	534	3914	248	840	420.456	593.812	761.921	2298.33	360.219	1088.51	920.54	592.063	1249.02	2.1096	1.07697	0.00262051	0.0443645	chrIII	10254761	10257136	plus
WBGene00018914	96	83	44	22	267	160	49.4654	97.0205	62.78	12.9186	387.816	207.334	136.223	69.7553	202.69	2.90572	1.5389	0.00264533	0.0447019	chrV	2440291	2446137	minus
WBGene00006363	3438	2205	2428	20216	1088	3632	1771.48	2577.47	3464.31	11871	1580.31	4706.49	4328.51	2604.42	6052.59	2.32397	1.21659	0.00267113	0.0450406	chrII	7585680	7594864	minus
WBGene00000727	297	168	176	885	250	269	153.034	196.379	251.12	519.678	363.124	348.581	305.319	200.178	410.461	2.05049	1.03597	0.00267276	0.0450406	chrV	11385342	11386363	plus
WBGene00020270	66	43	75	1271	13	125	34.0075	50.2636	107.011	746.34	18.8824	161.98	186.414	63.7608	309.068	4.8473	2.27718	0.00268148	0.0450944	chrV	6414976	6417412	plus
WBGene00021326	372	436	421	6098	130	602	191.679	509.65	600.69	3580.79	188.824	780.096	975.288	434.006	1516.57	3.49435	1.80502	0.00268479	0.0450944	chrX	5249819	5252749	plus
WBGene00004230	285	348	441	8378	61	584	146.851	406.785	629.227	4919.62	88.6022	756.771	1157.98	394.287	1921.66	4.87377	2.28504	0.0026858	0.0450944	chrV	1170130	1175673	plus
WBGene00021875	178	46	49	431	70	252	91.7172	53.7704	69.9141	253.086	101.675	326.552	149.452	71.8005	227.104	3.16299	1.66129	0.00269906	0.045234	chrIV	2799692	2800982	plus
WBGene00013456	711	388	469	3904	199	662	366.353	453.542	669.178	2292.46	289.047	857.846	821.404	496.358	1146.45	2.30973	1.20772	0.00270467	0.0452452	chrIV	14374102	14379616	plus
WBGene00010683	345	82	191	2992	47	361	177.766	95.8516	272.522	1756.92	68.2673	467.798	473.188	182.047	764.33	4.19854	2.06989	0.00270884	0.0452734	chrII	8754017	8755176	minus
WBGene00017794	108	63	89	1171	11	89	55.6486	73.642	126.987	687.62	15.9774	115.33	179.201	85.4258	272.976	3.19547	1.67603	0.00271716	0.0453711	chrX	4442136	4448126	minus
WBGene00013845	65	118	75	886	33	445	33.4922	137.933	107.011	520.265	47.9323	576.649	237.214	92.8121	381.616	4.1117	2.03973	0.00272718	0.0454747	chrIII	1285008	1287132	plus
WBGene00004924	655	469	608	6484	253	1080	337.499	548.224	867.506	3807.45	367.481	1399.51	1221.28	584.409	1858.15	3.17953	1.66881	0.00272833	0.0454747	chrI	6436045	6441193	plus
WBGene00016788	42	51	106	1324	74	1295	21.6411	59.615	151.243	777.462	107.485	1678.11	465.926	77.4996	854.353	11.024	3.46257	0.00273442	0.0454772	chrV	4040394	4041989	minus
WBGene00007800	2861	2235	1823	13788	956	3456	1474.17	2612.54	2601.09	8096.41	1388.59	4478.42	3441.87	2229.27	4654.47	2.08789	1.06205	0.00274347	0.0455335	chrV	10847173	10852548	plus
WBGene00001608	257	159	183	1481	112	250	132.423	185.859	261.108	869.654	162.679	323.96	322.614	193.13	452.098	2.3409	1.22706	0.00275416	0.0456558	chrX	9870750	9872567	minus
WBGene00000780	339	319	315	1650	693	777	174.675	372.886	449.448	968.892	1006.58	1006.87	663.224	332.336	994.113	2.99129	1.58077	0.00275983	0.0457083	chrI	10924231	10925746	minus
WBGene00004301	43	39	59	1015	14	92	22.1564	45.5879	84.1823	596.015	20.3349	119.217	147.916	50.6422	245.189	4.8416	2.27548	0.00278072	0.0458699	chrX	14550068	14556230	plus
WBGene00016733	1240	1045	1166	11384	929	1708	638.929	1221.52	1663.67	6684.77	1349.37	2213.29	2295.26	1174.71	3415.81	2.9078	1.53993	0.00278274	0.0458699	chrI	5046399	5048021	minus
WBGene00016066	186	306	316	2961	319	1021	95.8393	357.69	450.875	1738.72	463.346	1323.05	738.254	301.468	1175.04	3.89773	1.96263	0.00278699	0.0458699	chrI	4094612	4098331	plus
WBGene00019236	238	335	388	6970	94	604	122.633	391.589	553.605	4092.83	136.535	782.687	1013.31	355.942	1670.69	4.6937	2.23072	0.00278713	0.0458699	chrV	4911750	4912369	minus
WBGene00015729	178	108	86	409	196	235	91.7172	126.244	122.706	240.168	284.689	304.522	195.008	113.556	276.46	2.43457	1.28367	0.00279686	0.0459473	chrII	1357184	1358014	minus
WBGene00012763	360	314	368	4307	128	620	185.495	367.041	525.069	2529.1	185.919	803.421	766.008	359.202	1172.81	3.26505	1.70711	0.00284039	0.0465208	chrIV	14981577	14996284	plus
WBGene00011428	81	61	40	469	35	115	41.7365	71.3042	57.0727	275.4	50.8373	149.022	107.562	56.7045	158.42	2.79378	1.48222	0.00285634	0.0466731	chrV	11064936	11065616	minus
WBGene00002177	464	269	313	2902	74	388	239.083	314.44	446.594	1704.08	107.485	502.786	552.41	333.372	771.449	2.31407	1.21044	0.00287103	0.0467495	chrX	5368434	5372027	plus
WBGene00009432	82	57	64	615	12	100	42.2517	66.6285	91.3164	361.132	17.4299	129.584	118.057	66.7322	169.382	2.53824	1.34383	0.00287268	0.0467495	chrV	13749172	13751908	minus
WBGene00022633	150	166	223	3164	82	514	77.2897	194.041	318.18	1857.92	119.105	666.062	538.767	196.504	881.03	4.48353	2.16463	0.00288857	0.0468869	chrI	6651219	6655430	plus
WBGene00013159	213	68	43	343	281	140	109.751	79.4867	61.3532	201.412	408.151	181.418	173.595	83.5304	263.66	3.15646	1.65831	0.00288992	0.0468869	chrII	15019147	15025692	plus
WBGene00022106	42	46	65	963	76	83	21.6411	53.7704	92.7432	565.48	110.39	107.555	158.597	56.0516	261.142	4.65895	2.22001	0.0029006	0.0470185	chrIII	1125233	1136015	minus
WBGene00011608	413	121	118	771	330	307	212.804	141.439	168.365	452.737	479.323	397.823	308.749	174.203	443.294	2.5447	1.3475	0.00290457	0.0470413	chrX	173180	177000	plus
WBGene00017892	2020	1424	1365	10190	467	2502	1040.84	1664.54	1947.61	5983.64	678.315	3242.19	2426.19	1551	3301.38	2.12856	1.08988	0.00291271	0.0470481	chrX	3227477	3235396	minus
WBGene00018639	993	379	366	3318	187	602	511.658	443.021	522.215	1948.35	271.617	780.096	746.16	492.298	1000.02	2.03133	1.02243	0.00298498	0.0477672	chrX	5897307	5902135	plus
WBGene00021578	864	397	186	591	1163	958	445.189	464.062	265.388	347.039	1689.25	1241.41	742.057	391.546	1092.57	2.79039	1.48047	0.00298594	0.0477672	chrII	862933	866908	minus
WBGene00044445	69	86	32	1347	20	56	35.5533	100.527	45.6582	790.968	29.0499	72.567	179.054	60.5796	297.528	4.91136	2.29612	0.00301093	0.0480648	chrIII	8234452	8235458	minus
WBGene00006674	114	63	41	74	248	151	58.7402	73.642	58.4995	43.4533	360.219	195.672	131.704	63.6273	199.781	3.13987	1.6507	0.00307541	0.048938	chrX	16299832	16304050	plus
WBGene00009261	661	707	798	11961	153	1049	340.59	826.427	1138.6	7023.58	222.232	1359.34	1818.46	768.54	2868.38	3.73225	1.90005	0.00307672	0.048938	chrI	9479100	9480670	minus
WBGene00008512	987	621	638	5879	161	628	508.567	725.9	910.31	3452.19	233.852	813.787	1107.43	714.926	1499.94	2.09804	1.06904	0.00310753	0.0492993	chrIV	10246140	10249885	plus
WBGene00009908	907	279	232	820	959	603	467.345	326.129	331.022	481.51	1392.94	781.391	630.057	374.832	885.281	2.36181	1.23989	0.00310865	0.0492993	chrV	17023449	17025505	plus
WBGene00006670	256	117	62	817	119	211	131.908	136.764	88.4627	479.748	172.847	273.422	213.859	119.045	308.672	2.59291	1.37457	0.00315692	0.0499351	chrX	3081123	3085326	plus

## Sheet: rbbp-5 down
WBGeneID	WT_1	WT_2	WT_3	rbbp5_1	rbbp5_2	rbbp5_3	WT_1_norm	WT_2_norm	WT_3_norm	rbbp5_1_norm	rbbp5_2_norm	rbbp5_3_norm	baseMean	baseMeanA	baseMeanB	foldChange	log2FoldChange	pval	padj	chrom	start	end	strand
WBGene00010212	46354	18580	13223	2372	554	799	23884.6	21718.6	18866.8	1392.86	804.682	1035.38	11283.8	21490	1077.64	0.050146	-4.31772	1.1334e-15	1.88566e-12	chrV	17640646	17650496	minus
WBGene00017683	40836	16760	11628	3556	923	834	21041.4	19591.1	16591	2088.11	1340.65	1080.73	10288.8	19074.5	1503.16	0.0788049	-3.66557	1.8687e-13	1.79995e-10	chrII	6097802	6099635	plus
WBGene00044202	1815	720	405	168	149	76	935.206	841.623	577.861	98.6508	216.422	98.4838	461.375	784.897	137.852	0.175631	-2.50938	6.99875e-07	8.89473e-05	chrV	17273499	17274992	plus
WBGene00011903	1270	471	334	221	50	21	654.387	550.562	476.557	129.773	72.6248	27.2126	318.519	560.502	76.5367	0.13655	-2.8725	3.40968e-06	0.000318371	chrX	10886092	10887746	plus
WBGene00021463	57291	22003	14216	9717	7703	6542	29520	25719.8	20283.6	5705.89	11188.6	8477.39	16815.9	25174.5	8457.28	0.335946	-1.5737	4.89485e-06	0.000414295	chrI	2342218	2350470	plus
WBGene00019243	8807	3548	2167	1313	1290	949	4537.94	4147.33	3091.92	771.003	1873.72	1229.75	2608.61	3925.73	1291.49	0.328981	-1.60392	7.67381e-06	0.000573218	chrV	722696	723828	minus
WBGene00014955	1436	761	616	272	75	84	739.921	889.549	878.92	159.72	108.937	108.851	480.983	836.13	125.836	0.150498	-2.73218	1.09936e-05	0.000759219	chrV	16929143	16930039	plus
WBGene00045362	1865	802	844	202	233	134	960.969	937.475	1204.23	118.616	338.431	173.643	622.228	1034.23	210.23	0.203273	-2.29851	1.42229e-05	0.000946257	chrV	18749551	18750663	minus
WBGene00021709	13903	4362	3521	1915	1898	1382	7163.73	5098.84	5023.83	1124.5	2756.84	1790.85	3826.43	5762.13	1890.73	0.32813	-1.60766	1.72052e-05	0.00110535	chrV	696524	699615	minus
WBGene00077495	939	339	263	64	70	55	483.834	396.264	375.253	37.5813	101.675	71.2712	244.313	418.45	70.1757	0.167704	-2.57601	1.94617e-05	0.00120327	chrV	17380207	17381094	plus
WBGene00009618	4388	1432	1168	1340	284	546	2260.98	1673.9	1666.52	786.858	412.509	707.529	1251.38	1867.13	635.632	0.340432	-1.55456	4.17488e-05	0.0021282	chrX	10273633	10278243	plus
WBGene00020973	9301	3057	3027	3679	533	1063	4792.48	3573.39	4318.98	2160.33	774.18	1377.48	2832.81	4228.28	1437.33	0.339932	-1.55668	4.56362e-05	0.00228194	chrIV	4332712	4335365	minus
WBGene00045365	1096	495	431	182	43	104	564.73	578.616	614.959	106.872	62.4573	134.767	343.734	586.102	101.365	0.172949	-2.53159	4.85415e-05	0.00237529	chrX	5014009	5015244	plus
WBGene00007367	4382	1433	1096	1592	284	449	2257.89	1675.06	1563.79	934.834	412.509	581.832	1237.65	1832.25	643.058	0.350966	-1.51059	7.65395e-05	0.00340815	chrV	15479526	15481659	minus
WBGene00018134	2541	856	668	625	221	290	1309.29	1000.6	953.115	367.004	321.001	375.794	721.133	1087.67	354.6	0.326019	-1.61697	8.00199e-05	0.0035203	chrIII	6713528	6717966	plus
WBGene00016308	11502	3667	2711	1516	1695	1207	5926.58	4286.43	3868.1	890.206	2461.98	1564.08	3166.23	4693.71	1638.75	0.349139	-1.51813	9.82533e-05	0.00409598	chrII	970652	972957	minus
WBGene00010185	1008	349	461	81	126	75	519.387	407.954	657.763	47.5638	183.014	97.188	318.812	528.368	109.255	0.206779	-2.27384	0.000106604	0.00435483	chrV	15769409	15770540	plus
WBGene00011131	1664	718	534	397	121	172	857.401	839.286	761.921	233.121	175.752	222.884	515.061	819.536	210.586	0.256957	-1.9604	0.000107243	0.00436147	chrIV	11202748	11203486	plus
WBGene00007693	1167	351	338	162	129	91	601.314	410.291	482.265	95.1276	187.372	117.921	315.715	497.957	133.474	0.268043	-1.89947	0.000161077	0.00596734	chrX	12229883	12233023	plus
WBGene00018103	26899	8101	6340	4539	3367	2626	13860.1	9469.43	9046.03	2665.33	4890.55	3402.88	7222.39	10791.9	3652.92	0.338489	-1.56282	0.000173874	0.00629517	chrII	1761845	1762912	plus
WBGene00194683	4706	2374	1579	1193	576	796	2424.84	2775.02	2252.95	700.538	836.637	1031.49	1670.24	2484.27	856.221	0.344657	-1.53676	0.000214524	0.00737402	chrIII	10195816	10196989	minus
WBGene00015270	4208	1783	1526	532	844	621	2168.24	2084.19	2177.32	312.394	1225.91	804.717	1462.13	2143.25	781.006	0.364403	-1.45639	0.000215165	0.00737402	chrV	2501050	2502425	plus
WBGene00022312	3368	1125	838	722	498	437	1735.41	1315.04	1195.67	423.964	723.343	566.282	993.285	1415.37	571.196	0.403565	-1.30913	0.00021652	0.0074066	chrIV	1425481	1426886	minus
WBGene00021566	2182	1139	758	208	400	337	1124.31	1331.4	1081.53	122.139	580.998	436.698	779.512	1179.08	379.945	0.322239	-1.6338	0.000235333	0.00787353	chrV	2556173	2557521	plus
WBGene00045299	9016	4014	2631	1230	2054	1252	4645.63	4692.05	3753.96	722.265	2983.42	1622.39	3069.95	4363.88	1776.03	0.406984	-1.29696	0.000246566	0.00818949	chrIV	901110	902891	plus
WBGene00021668	1968	641	440	324	268	186	1014.04	749.279	627.8	190.255	389.269	241.026	535.278	797.04	273.517	0.343166	-1.54302	0.000301958	0.00954426	chrI	240491	245414	plus
WBGene00045300	9260	4115	2722	1308	2182	1224	4771.35	4810.11	3883.8	768.067	3169.34	1586.11	3164.8	4488.42	1841.17	0.410205	-1.28558	0.00030415	0.00959697	chrIV	896958	898739	plus
WBGene00077772	8784	2903	2404	1268	1772	1571	4526.09	3393.38	3430.07	744.579	2573.82	2035.76	2783.95	3783.18	1784.72	0.471752	-1.0839	0.00037118	0.0111726	chrI	11824967	11825778	minus
WBGene00016848	4545	1713	1139	2279	261	500	2341.88	2002.36	1625.15	1338.24	379.101	647.92	1389.11	1989.8	788.422	0.396233	-1.33558	0.000389724	0.0115973	chrIV	7745977	7748213	minus
WBGene00021252	6610	2432	1641	2206	746	1082	3405.9	2842.82	2341.41	1295.38	1083.56	1402.1	2061.86	2863.38	1260.35	0.440161	-1.1839	0.000394822	0.0116731	chrIII	1653722	1657471	minus
WBGene00012958	5332	2001	1276	1189	990	655	2747.39	2339.01	1820.62	698.189	1437.97	848.775	1648.66	2302.34	994.978	0.432159	-1.21037	0.000416493	0.0121373	chrI	12085018	12087821	minus
WBGene00019072	3722	1220	805	439	592	380	1917.82	1426.08	1148.59	257.784	859.877	492.419	1017.09	1497.5	536.693	0.358394	-1.48038	0.000422079	0.0122223	chrIV	909415	913167	plus
WBGene00012564	2528	933	938	628	405	272	1302.59	1090.6	1338.36	368.766	588.261	352.468	840.174	1243.85	436.498	0.350925	-1.51076	0.000486886	0.0137037	chrV	18123949	18125217	plus
WBGene00044734	5891	2774	2372	785	1350	959	3035.43	3242.59	3384.41	460.958	1960.87	1242.71	2221.16	3220.81	1221.51	0.379256	-1.39875	0.000513604	0.0142352	chrV	2392771	2394146	plus
WBGene00020624	2962	965	653	675	306	317	1526.21	1128.01	931.712	396.365	444.463	410.781	806.258	1195.31	417.203	0.349033	-1.51857	0.000535893	0.0146713	chrV	3430666	3431443	minus
WBGene00007418	809	205	200	188	43	43	416.849	239.629	285.364	110.395	62.4573	55.7211	195.069	313.947	76.1911	0.242688	-2.04283	0.000536317	0.0146713	chrII	10352045	10353403	plus
WBGene00044131	3828	1421	1077	912	646	545	1972.43	1661.04	1536.68	535.533	938.312	706.233	1225.04	1723.38	726.692	0.421666	-1.24583	0.000542167	0.0147872	chrV	2530145	2531173	plus
WBGene00018912	2896	1483	977	338	591	518	1492.21	1733.51	1394	198.476	858.425	671.245	1057.98	1539.91	576.049	0.37408	-1.41858	0.000543806	0.0148087	chrV	2447894	2449242	plus
WBGene00045301	8076	3642	2297	1097	1981	1189	4161.28	4257.21	3277.4	644.166	2877.39	1540.75	2793.03	3898.63	1687.44	0.432828	-1.20813	0.000559592	0.015041	chrIV	892806	894586	plus
WBGene00013030	12815	5390	4737	1877	3246	1662	6603.12	6300.49	6758.84	1102.19	4714.8	2153.69	4605.52	6554.15	2656.89	0.405375	-1.30267	0.000570279	0.0151476	chrIII	12378888	12380511	minus
WBGene00017503	1660	528	445	625	45	218	855.34	617.191	634.934	367.004	65.3623	282.493	470.387	702.488	238.287	0.339204	-1.55978	0.000588966	0.0154399	chrV	1610335	1612747	plus
WBGene00019921	20703	7696	6282	4039	3937	4381	10667.5	8996.02	8963.27	2371.73	5718.47	5677.07	7065.68	9542.27	4589.09	0.480922	-1.05612	0.000770444	0.0188501	chrII	931191	932334	plus
WBGene00008483	782	301	246	247	31	44	402.937	351.845	350.997	145.04	45.0273	57.017	225.477	368.593	82.3615	0.223448	-2.16199	0.000931627	0.0218586	chrII	10440226	10442457	plus
WBGene00010361	3420	1371	791	887	530	474	1762.21	1602.59	1128.61	520.853	769.822	614.228	1066.39	1497.8	634.968	0.423933	-1.23809	0.00116077	0.0255401	chrX	15055430	15056752	minus
WBGene00011366	5213	1811	1505	1710	740	876	2686.08	2116.92	2147.36	1004.12	1074.85	1135.16	1694.08	2316.78	1071.38	0.462441	-1.11266	0.00118344	0.0258725	chrIII	9250959	9252988	plus
WBGene00005059	1158	680	480	237	216	119	596.677	794.867	684.873	139.168	313.739	154.205	447.255	692.139	202.371	0.292385	-1.77406	0.00126546	0.0269642	chrII	4534739	4537238	minus
WBGene00006308	9891	3858	2860	3053	1785	1715	5096.49	4509.7	4080.7	1792.74	2592.7	2222.37	3382.45	4562.3	2202.6	0.482784	-1.05055	0.00141884	0.0293932	chrX	3267283	3270851	minus
WBGene00164972	649	250	187	140	25	71	334.407	292.23	266.815	82.209	36.3124	92.0046	183.996	297.817	70.1753	0.235632	-2.08539	0.0014426	0.0295995	chrX	10883461	10885000	plus
WBGene00001578	3908	1336	1052	1406	530	590	2013.66	1561.68	1501.01	825.613	769.822	764.546	1239.39	1692.12	786.66	0.464897	-1.10502	0.00146258	0.0298209	chrV	1427650	1432139	minus
WBGene00022868	7206	2490	1923	3084	749	1297	3713	2910.61	2743.77	1810.95	1087.92	1680.7	2324.49	3122.46	1526.52	0.488885	-1.03243	0.00155933	0.0312223	chrII	2320335	2321954	plus
WBGene00005597	2081	651	526	555	333	266	1072.27	760.968	750.506	325.9	483.681	344.693	623.002	861.247	384.758	0.446745	-1.16248	0.00158203	0.0315733	chrV	3432256	3433655	plus
WBGene00017512	1377	403	342	495	91	165	709.52	471.075	487.972	290.668	132.177	213.814	384.204	556.189	212.219	0.38156	-1.39002	0.0015888	0.0316739	chrV	1615763	1617942	minus
WBGene00020345	1297	618	523	445	123	171	668.299	722.393	746.226	261.307	178.657	221.589	466.412	712.306	220.518	0.309583	-1.6916	0.00186874	0.035662	chrI	6225098	6225966	plus
WBGene00044526	12834	6043	3818	4146	1886	2983	6612.91	7063.79	5447.59	2434.56	2739.41	3865.49	4693.96	6374.77	3013.15	0.472669	-1.0811	0.0018932	0.0357828	chrV	3257583	3258238	plus
WBGene00012640	1796	472	446	396	182	216	925.416	551.731	636.361	232.534	264.354	279.901	481.716	704.503	258.93	0.367536	-1.44404	0.00196505	0.0368159	chrIV	13455293	13456125	plus
WBGene00011215	1037	305	274	343	73	105	534.33	356.521	390.948	201.412	106.032	136.063	287.551	427.266	147.836	0.346004	-1.53114	0.00206053	0.0379756	chrIII	3960238	3961819	plus
WBGene00017555	510	299	177	73	74	32	262.785	349.508	252.547	42.8661	107.485	41.4669	176.11	288.28	63.9392	0.221796	-2.1727	0.00215535	0.0389004	chrII	3399757	3402928	minus
WBGene00012247	4497	1811	1586	887	1194	599	2317.15	2116.92	2262.93	520.853	1734.28	776.208	1621.39	2232.33	1010.45	0.452642	-1.14356	0.002207	0.0395983	chrV	19739660	19741068	minus
WBGene00018102	2970	1275	823	1159	475	367	1530.34	1490.37	1174.27	680.573	689.935	475.573	1006.84	1398.33	615.36	0.440069	-1.1842	0.00229225	0.0406313	chrII	1763378	1766600	plus
WBGene00022311	1438	709	527	268	261	241	740.951	828.765	751.933	157.372	379.101	312.297	528.403	773.883	282.923	0.365589	-1.4517	0.00229787	0.0406313	chrIV	1423122	1425061	minus

## Sheet: wdr-5 DEGs
WBGeneID	WT_1	WT_2	WT_3	wdr5_1	wdr5_2	wdr5_3	WT_1_norm	WT_2_norm	WT_3_norm	wdr5_1_norm	wdr5_2_norm	wdr5_3_norm	baseMean	baseMeanA	baseMeanB	foldChange	log2FoldChange	pval	padj	chrom	start	end	strand
WBGene00010212	46354	18580	13223	294	277	112	21259.7	20632.6	18285.2	165.541	297.017	253.476	10148.9	20059.2	238.678	0.0118987	-6.39305	1.21091e-51	2.17527e-47	chrV	17640646	17650496	minus
WBGene00011594	289	160	135	1385	1727	1592	132.547	177.676	186.682	779.845	1851.8	3602.98	1121.92	165.635	2078.21	12.5469	3.64926	9.88239e-30	4.43818e-26	chrIV	10533897	10536410	plus
WBGene00006474	98089	40768	33048	7649	3399	1401	44987.4	45271.8	45699.7	4306.88	3644.62	3170.72	24513.5	45319.7	3707.41	0.0818057	-3.61165	2.43629e-24	8.75311e-21	chrIII	3705247	3706767	plus
WBGene00021226	6063	1924	1633	334	197	69	2780.73	2136.55	2258.16	188.064	211.236	156.159	1288.48	2391.81	185.153	0.0774112	-3.69131	5.83254e-23	1.3097e-19	chrV	2368943	2373701	minus
WBGene00044608	19791	10410	7297	1069	909	477	9076.92	11560	10090.5	601.916	974.688	1079.54	5563.93	10242.5	885.38	0.0864419	-3.53212	2.85078e-22	5.12113e-19	chrIV	8200588	8201221	minus
WBGene00013030	12815	5390	4737	982	619	266	5877.46	5985.46	6550.46	552.93	663.731	602.006	3372.01	6137.79	606.222	0.0987688	-3.3398	3.56255e-21	5.81796e-18	chrIII	12378888	12380511	minus
WBGene00018920	3768	1013	930	203	91	30	1728.15	1124.91	1286.03	114.302	97.576	67.8954	736.478	1379.7	93.2579	0.067593	-3.88698	5.04215e-21	7.02161e-18	chrV	2476904	2481662	minus
WBGene00015236	1099	335	280	3718	3568	1717	504.044	372.009	387.192	2093.47	3825.84	3885.88	1844.74	421.082	3268.4	7.76191	2.95641	5.08133e-21	7.02161e-18	chrI	10648590	10654168	minus
WBGene00012564	2528	933	938	173	54	30	1159.44	1036.07	1297.09	97.4102	57.9022	67.8954	619.302	1164.2	74.4026	0.0639087	-3.96784	5.29628e-20	6.34283e-17	chrV	18123949	18125217	plus
WBGene00019142	1703	1160	721	129	69	32	781.062	1288.15	997.02	72.6353	73.9862	72.4218	547.546	1022.08	73.0144	0.0714373	-3.80718	2.33602e-17	2.20865e-14	chrII	2032498	2033230	plus
WBGene00018912	2896	1483	977	273	165	72	1328.22	1646.83	1351.02	153.717	176.924	162.949	803.277	1442.03	164.53	0.114096	-3.13168	7.31071e-16	6.25379e-13	chrV	2447894	2449242	plus
WBGene00001622	88	45	48	605	448	322	40.3602	49.9713	66.3758	340.654	480.374	728.744	284.413	52.2358	516.591	9.8896	3.30591	2.24169e-15	1.83044e-12	chrX	6403385	6406876	plus
WBGene00019154	11830	5888	5073	44225	18371	13315	5425.7	6538.47	7015.09	24901.5	19698.6	30134.3	15618.9	6326.42	24911.4	3.93768	1.97735	1.01173e-14	7.11567e-12	chrIV	5885823	5889793	plus
WBGene00045062	1032	506	296	2556	2776	1465	473.315	561.9	409.317	1439.19	2976.6	3315.56	1529.32	481.511	2577.12	5.35215	2.42012	1.36953e-14	8.78654e-12	chrIV	13456952	13460229	minus
WBGene00021566	2182	1139	758	197	153	60	1000.75	1264.83	1048.18	110.924	164.056	135.791	620.756	1104.59	136.924	0.123959	-3.01207	2.41877e-14	1.4983e-11	chrV	2556173	2557521	plus
WBGene00003590	464	268	203	2122	1009	809	212.808	297.607	280.714	1194.82	1081.91	1830.91	816.463	263.71	1369.22	5.19213	2.37633	3.29203e-14	1.97127e-11	chrIII	4442053	4444211	plus
WBGene00013489	167	60	52	947	469	299	76.5927	66.6285	71.9071	533.222	502.892	676.691	321.322	71.7094	570.935	7.96179	2.99309	6.7256e-14	3.77559e-11	chrV	18638454	18639560	plus
WBGene00009968	784	361	229	3260	1134	969	359.573	400.881	316.668	1835.59	1215.95	2193.02	1053.61	359.041	1748.19	4.86905	2.28364	1.09533e-13	5.7872e-11	chrV	10967952	10980755	minus
WBGene00009723	418	188	192	1823	1020	583	191.711	208.769	265.503	1026.47	1093.71	1319.43	684.266	221.994	1146.54	5.16471	2.36869	1.21303e-13	6.22596e-11	chrV	12549197	12550336	minus
WBGene00010041	295	187	118	1394	735	588	135.298	207.659	163.174	784.912	788.114	1330.75	568.318	168.71	967.925	5.7372	2.52035	1.38182e-13	6.89529e-11	chrII	8566469	8566806	minus
WBGene00019592	85	51	43	176	439	383	38.9843	56.6342	59.4617	99.0994	470.724	866.798	265.284	51.6934	478.874	9.26374	3.21159	1.87127e-13	8.84619e-11	chrII	2280683	2282881	minus
WBGene00010285	2278	1063	1027	8532	3282	2585	1044.78	1180.43	1420.17	4804.07	3519.17	5850.32	2969.82	1215.13	4724.52	3.88809	1.95906	2.33915e-13	1.07745e-10	chrV	11929086	11929971	plus
WBGene00008016	8429	3988	3228	1113	874	347	3865.87	4428.57	4463.77	626.691	937.158	785.324	2517.9	4252.74	783.058	0.18413	-2.4412	3.59643e-13	1.58952e-10	chrV	17551480	17552790	minus
WBGene00001864	1563	997	1028	128	126	60	716.852	1107.14	1421.55	72.0723	135.105	135.791	598.085	1081.85	114.323	0.105674	-3.24231	3.62783e-13	1.58952e-10	chrV	14090799	14092417	plus
WBGene00044395	340	106	107	2371	422	356	155.937	117.71	147.963	1335.03	452.495	805.692	502.471	140.537	864.405	6.15074	2.62076	4.75293e-13	2.0329e-10	chrII	6042768	6043248	minus
WBGene00003485	1386	781	596	3765	2849	2134	635.673	867.281	824.166	2119.94	3054.88	4829.63	2055.26	775.707	3334.82	4.29907	2.10402	5.90477e-13	2.41076e-10	chrX	16262222	16265614	minus
WBGene00009958	2963	1249	1231	9872	4136	3107	1358.95	1386.98	1702.26	5558.57	4434.88	7031.7	3578.89	1482.73	5675.05	3.82743	1.93638	7.93135e-13	3.09736e-10	chrI	8931028	8942280	minus
WBGene00013882	1042	421	472	3445	1700	1474	477.902	467.51	652.695	1939.76	1822.85	3335.93	1449.44	532.702	2366.18	4.44184	2.15116	8.32591e-13	3.18227e-10	chrIV	9088596	9092180	plus
WBGene00008076	821	455	328	2166	1868	1324	376.542	505.266	453.568	1219.6	2002.99	2996.45	1259.07	445.125	2073.01	4.65714	2.21945	9.06735e-13	3.39346e-10	chrIV	10578647	10581765	plus
WBGene00009297	16597	6260	5048	2627	1590	569	7612.03	6951.57	6980.52	1479.17	1704.9	1287.75	4335.99	7181.37	1490.61	0.207566	-2.26836	1.59649e-12	5.73588e-10	chrV	17326428	17327942	minus
WBGene00004831	1426	619	638	3856	2471	2029	654.019	687.384	882.245	2171.18	2649.56	4591.99	1939.4	741.216	3137.58	4.23302	2.08169	2.07936e-12	7.32426e-10	chrX	11394541	11401483	minus
WBGene00000902	2349	1095	1148	8960	3892	3140	1077.34	1215.97	1587.49	5045.06	4173.25	7106.39	3367.58	1293.6	5441.57	4.20653	2.07263	2.44826e-12	8.45781e-10	chrX	14888418	14894257	plus
WBGene00017101	3066	1899	1569	517	250	104	1406.19	2108.79	2169.66	291.104	268.066	235.371	1079.86	1894.88	264.847	0.13977	-2.83887	3.61125e-12	1.20134e-09	chrIII	2461899	2465068	plus
WBGene00000169	117	48	40	495	318	350	53.6607	53.3028	55.3132	278.717	340.98	792.113	262.348	54.0922	470.603	8.70002	3.12102	3.75823e-12	1.22751e-09	chrII	7235793	7238308	minus
WBGene00020192	356	198	230	4062	1382	1348	163.275	219.874	318.051	2287.17	1481.87	3050.77	1253.5	233.733	2273.27	9.72591	3.28183	4.25767e-12	1.3658e-09	chrI	3853838	3854242	plus
WBGene00010348	96	51	38	643	245	288	44.0293	56.6342	52.5475	362.051	262.705	651.796	238.294	51.0703	425.517	8.33198	3.05866	4.80006e-12	1.51278e-09	chrIV	11803250	11804093	minus
WBGene00007343	524	324	316	2900	2129	1918	240.327	359.794	436.974	1632.89	2282.85	4340.78	1548.94	345.698	2752.17	7.9612	2.99299	4.90397e-12	1.51888e-09	chrX	12941371	12943477	minus
WBGene00018470	308	144	143	1265	663	522	141.261	159.908	197.745	712.277	710.911	1181.38	517.247	166.305	868.189	5.22048	2.38418	5.42567e-12	1.65198e-09	chrIV	7628197	7629029	minus
WBGene00011185	973	425	386	3266	1485	1151	446.256	471.952	533.772	1838.97	1592.31	2604.92	1248.03	483.993	2012.07	4.15722	2.05562	5.65851e-12	1.69416e-09	chrV	13932567	13934631	minus
WBGene00018031	175	73	63	238	484	512	80.2618	81.0646	87.1182	134.009	518.976	1158.75	343.363	82.8149	603.911	7.2923	2.86637	6.41708e-12	1.8593e-09	chrX	17019543	17020732	minus
WBGene00007325	669	375	305	2538	1273	837	306.829	416.428	421.763	1429.06	1364.99	1894.28	972.225	381.673	1562.78	4.09454	2.0337	7.13942e-12	2.03576e-09	chrX	11160915	11163620	plus
WBGene00000048	113	89	68	892	529	460	51.8262	98.8322	94.0324	502.254	567.228	1041.06	392.539	81.5636	703.515	8.62535	3.10858	8.19131e-12	2.26383e-09	chrX	13642278	13646828	minus
WBGene00011705	796	446	359	1886	1598	1364	365.076	495.272	496.436	1061.94	1713.48	3086.98	1203.2	452.261	1954.13	4.3208	2.1113	8.59533e-12	2.33949e-09	chrV	9882014	9885936	minus
WBGene00021389	337	238	239	3664	2541	2044	154.561	264.293	330.496	2063.07	2724.62	4625.94	1693.83	249.783	3137.88	12.5624	3.65104	9.30674e-12	2.49532e-09	chrV	6057347	6063408	minus
WBGene00017772	576	321	278	2291	1000	805	264.176	356.462	384.427	1289.98	1072.26	1821.86	864.862	335.022	1394.7	4.16302	2.05763	9.76801e-12	2.58048e-09	chrV	5699994	5701066	plus
WBGene00001403	1068	528	529	3422	1924	1504	489.826	586.331	731.517	1926.81	2063.04	3403.82	1533.56	602.558	2464.56	4.09016	2.03216	1.24031e-11	3.13816e-09	chrIV	9540789	9546233	plus
WBGene00010873	494	229	245	1677	986	768	226.568	254.299	338.793	944.259	1057.25	1738.12	759.882	273.22	1246.54	4.56243	2.1898	1.31848e-11	3.24455e-09	chrI	7183051	7185707	plus
WBGene00008292	953	396	379	3278	1370	1020	437.083	439.748	524.092	1845.73	1469	2308.44	1170.68	466.974	1874.39	4.01391	2.00501	1.46491e-11	3.55617e-09	chrI	12449982	12452019	plus
WBGene00011866	417	172	193	1321	926	639	191.252	191.002	266.886	743.808	992.916	1446.17	638.673	216.38	1060.97	4.90325	2.29374	1.4893e-11	3.56717e-09	chrI	10300599	10302936	minus
WBGene00045210	96	63	60	684	339	253	44.0293	69.9599	82.9698	385.136	363.497	572.585	253.03	65.653	440.406	6.70809	2.7459	1.56293e-11	3.69426e-09	chrX	7846140	7847410	minus
WBGene00044734	5891	2774	2372	1141	550	173	2701.84	3080.46	3280.07	642.457	589.745	391.53	1781.02	3020.79	541.244	0.179173	-2.48057	1.67456e-11	3.90673e-09	chrV	2392771	2394146	plus
WBGene00022623	1088	538	458	4083	1467	1136	498.999	597.435	633.336	2298.99	1573.01	2570.97	1362.12	576.59	2147.66	3.72476	1.89715	1.73613e-11	3.99845e-09	chrV	6727821	6730245	plus
WBGene00001373	112	70	34	641	375	227	51.3675	77.7332	47.0162	360.924	402.099	513.742	242.147	58.7056	425.588	7.24953	2.85789	1.79958e-11	4.0921e-09	chrII	6156986	6160993	minus
WBGene00019263	377	209	183	1520	748	592	172.907	232.089	253.058	855.858	802.053	1339.8	609.295	219.351	999.238	4.55543	2.18759	1.93362e-11	4.34195e-09	chrIV	5725589	5729716	plus
WBGene00011561	582	370	370	3524	2705	2563	266.928	410.876	511.647	1984.24	2900.47	5800.53	1979.12	396.483	3561.75	8.98335	3.16725	2.04655e-11	4.53878e-09	chrIII	10337746	10339341	plus
WBGene00002259	797	336	335	2927	1158	834	365.535	373.119	463.248	1648.09	1241.68	1887.49	996.528	400.634	1592.42	3.97475	1.99087	2.26636e-11	4.965e-09	chrV	13879536	13880200	plus
WBGene00010350	1484	671	596	4269	2164	1810	680.62	745.128	824.166	2403.72	2320.38	4096.36	1845.06	749.971	2940.15	3.92035	1.97098	2.55151e-11	5.52233e-09	chrIV	11783918	11792570	minus
WBGene00044131	3828	1421	1077	604	274	137	1755.67	1577.98	1489.31	340.091	293.8	310.056	961.151	1607.65	314.649	0.195719	-2.35314	2.5882e-11	5.53505e-09	chrV	2530145	2531173	plus
WBGene00006418	467	257	206	3130	610	404	214.184	285.392	284.863	1762.39	654.081	914.325	685.873	261.48	1110.27	4.24609	2.08613	3.61085e-11	7.54247e-09	chrV	9144593	9146877	minus
WBGene00014955	1436	761	616	149	61	15	658.605	845.071	851.823	83.8966	65.4081	33.9477	423.125	785.166	61.0841	0.0777977	-3.68413	3.88152e-11	7.93469e-09	chrV	16929143	16930039	plus
WBGene00077697	1024	456	500	3860	1587	1254	469.646	506.376	691.415	2173.43	1701.68	2838.03	1396.76	555.812	2237.71	4.02602	2.00936	3.88695e-11	7.93469e-09	chrV	9745216	9746251	plus
WBGene00007891	145	37	56	702	328	279	66.5026	41.0876	77.4384	395.271	351.702	631.428	260.572	61.6762	459.467	7.44967	2.89718	4.14722e-11	8.35297e-09	chrII	11370251	11372009	minus
WBGene00015227	190	93	74	551	629	377	87.1414	103.274	102.329	310.249	674.454	853.219	355.111	97.5816	612.641	6.27824	2.65036	4.18486e-11	8.35297e-09	chrV	8758798	8760494	minus
WBGene00017727	638	321	324	2224	1128	918	292.612	356.462	448.037	1252.26	1209.51	2077.6	939.413	365.703	1513.12	4.13757	2.04878	4.74154e-11	9.36011e-09	chrX	16677263	16677665	minus
WBGene00000723	80	43	48	558	346	165	36.6911	47.7504	66.3758	314.19	371.003	373.425	201.573	50.2724	352.873	7.01921	2.81131	4.90378e-11	9.57517e-09	chrV	10293493	10294596	minus
WBGene00008453	463	243	219	1503	897	757	212.35	269.845	302.84	846.286	961.821	1713.23	717.728	261.678	1173.78	4.48558	2.16529	4.98144e-11	9.58188e-09	chrV	12585080	12587979	plus
WBGene00010714	1641	856	704	4641	2675	1863	752.626	950.566	973.512	2613.18	2868.31	4216.31	2062.42	892.235	3232.6	3.62304	1.8572	5.0139e-11	9.58188e-09	chrIV	13434218	13445285	minus
WBGene00009109	210	110	114	573	637	475	96.3141	122.152	157.643	322.636	683.032	1075.01	409.465	125.37	693.56	5.53212	2.46783	5.20662e-11	9.84544e-09	chrV	10540357	10545718	plus
WBGene00020051	1450	542	644	4411	2384	1894	665.026	601.877	890.542	2483.68	2556.28	4286.47	1913.98	719.148	3108.81	4.3229	2.112	5.69927e-11	1.06648e-08	chrIII	7575208	7579344	minus
WBGene00018639	993	379	366	2403	1640	1243	455.428	420.87	506.115	1353.04	1758.51	2813.13	1217.85	460.805	1974.9	4.28576	2.09955	5.81163e-11	1.07629e-08	chrX	5897307	5902135	plus
WBGene00014300	619	233	184	1104	1243	891	283.897	258.741	254.441	621.623	1332.82	2016.49	794.67	265.693	1323.65	4.98187	2.31669	6.32378e-11	1.14748e-08	chrV	11789531	11800520	plus
WBGene00016957	606	234	248	2482	830	532	277.935	259.851	342.942	1397.53	889.979	1204.01	728.708	293.576	1163.84	3.96436	1.98709	6.57578e-11	1.18127e-08	chrIV	7881590	7900234	plus
WBGene00022335	5905	2299	1963	700	683	280	2708.26	2552.98	2714.49	394.145	732.356	633.691	1622.65	2658.58	586.731	0.220693	-2.17988	6.7276e-11	1.19658e-08	chrIII	1439088	1443374	plus
WBGene00044461	203	94	75	733	499	386	93.1037	104.385	103.712	412.726	535.06	873.588	353.762	100.4	607.125	6.04705	2.59623	7.71214e-11	1.34465e-08	chrI	667618	674416	minus
WBGene00003055	933	557	443	2955	1639	1193	427.91	618.534	612.593	1663.86	1757.44	2699.98	1296.72	553.013	2040.42	3.68965	1.88348	8.03227e-11	1.37421e-08	chrIII	5474437	5478343	plus
WBGene00019988	1886	952	858	5697	2759	1989	864.993	1057.17	1186.47	3207.78	2958.38	4501.47	2296.04	1036.21	3555.87	3.43161	1.77889	8.22827e-11	1.39446e-08	chrX	8306172	8307628	minus
WBGene00021325	1720	874	841	5339	2406	2172	788.859	970.555	1162.96	3006.2	2579.87	4915.63	2237.35	974.124	3500.57	3.59355	1.84541	9.17134e-11	1.53976e-08	chrX	5255160	5256827	plus
WBGene00022744	358	216	151	1205	820	560	164.193	239.862	208.807	678.493	879.256	1267.38	572.999	204.287	941.71	4.60973	2.20468	9.53869e-11	1.57412e-08	chrX	4163623	4169767	plus
WBGene00018731	120	58	53	666	314	244	55.0366	64.4075	73.2899	375.001	336.691	552.216	242.774	64.2447	421.303	6.55778	2.71321	9.55126e-11	1.57412e-08	chrX	8718506	8718922	minus
WBGene00044144	106	65	58	520	330	302	48.6157	72.1808	80.2041	292.794	353.847	683.481	255.187	67.0002	443.374	6.6175	2.72629	1.23303e-10	1.97314e-08	chrX	12150012	12150971	plus
WBGene00014077	141	69	56	626	377	292	64.6681	76.6227	77.4384	352.478	404.243	660.849	272.717	72.9097	472.524	6.48094	2.6962	1.23343e-10	1.97314e-08	chrIV	11678417	11681982	minus
WBGene00010258	1570	755	715	5005	2162	1568	720.063	838.408	988.723	2818.14	2318.23	3548.67	1872.04	849.065	2895.01	3.40965	1.76962	1.24156e-10	1.97314e-08	chrV	9756930	9757962	minus
WBGene00009326	231	142	128	934	552	479	105.946	157.687	177.002	525.902	591.89	1084.06	440.415	146.878	733.952	4.99701	2.32106	1.26314e-10	1.97314e-08	chrV	10880818	10883292	plus
WBGene00009595	240	132	130	1000	476	482	110.073	146.583	179.768	563.065	510.398	1090.85	433.457	145.475	721.438	4.95921	2.31011	1.40269e-10	2.17224e-08	chrIII	9914172	9915728	plus
WBGene00009917	403	183	192	1374	667	660	184.831	203.217	265.503	773.651	715.2	1493.7	606.017	217.85	994.183	4.5636	2.19017	1.48647e-10	2.2823e-08	chrI	7339202	7345947	plus
WBGene00009433	873	570	465	3683	2115	1771	400.392	632.97	643.016	2073.77	2267.84	4008.09	1671.01	558.793	2783.23	4.9808	2.31638	1.53011e-10	2.31278e-08	chrV	13741305	13745114	minus
WBGene00012565	11514	4937	4475	2292	1224	573	5280.77	5482.41	6188.16	1290.54	1312.45	1296.8	3475.19	5650.45	1299.93	0.230058	-2.11993	1.53207e-10	2.31278e-08	chrV	18125347	18127177	plus
WBGene00015704	1074	623	510	2928	1879	1466	492.578	691.826	705.243	1648.65	2014.78	3317.82	1478.48	629.882	2327.09	3.69448	1.88537	1.54986e-10	2.32014e-08	chrI	4422033	4426177	plus
WBGene00012640	1796	472	446	247	73	41	823.715	524.144	616.742	139.077	78.2753	92.7904	379.124	654.867	103.381	0.157865	-2.66323	1.67321e-10	2.4841e-08	chrIV	13455293	13456125	plus
WBGene00015731	7159	3639	2861	1386	804	382	3283.39	4041.02	3956.27	780.408	862.1	864.535	2297.95	3760.23	835.681	0.222242	-2.1698	1.82975e-10	2.69423e-08	chrV	2421866	2422894	plus
WBGene00017717	632	401	358	3007	1617	1408	289.86	445.3	495.053	1693.14	1733.85	3186.56	1307.29	410.071	2204.51	5.37594	2.42652	2.06355e-10	3.0138e-08	chrX	5999573	6001499	minus
WBGene00018915	1365	330	319	134	33	20	626.042	366.457	441.123	75.4507	35.3847	45.2636	264.953	477.874	52.033	0.108884	-3.19913	2.24443e-10	3.25153e-08	chrV	2449517	2452459	minus
WBGene00009541	557	339	272	1739	1065	834	255.462	376.451	376.13	979.169	1141.96	1887.49	836.111	336.014	1336.21	3.97664	1.99155	2.50252e-10	3.59642e-08	chrIV	9453631	9457484	minus
WBGene00001476	599	379	359	3277	1864	1518	274.725	420.87	496.436	1845.16	1998.7	3435.51	1411.9	397.343	2426.46	6.1067	2.61039	2.55313e-10	3.64003e-08	chrIV	10661837	10664384	plus
WBGene00020567	151	97	71	694	478	261	69.2545	107.716	98.1809	390.767	512.542	590.69	294.858	91.7171	498	5.42974	2.44088	2.86037e-10	4.01435e-08	chrX	3931750	3937879	plus
WBGene00016768	316	115	146	929	747	453	144.93	127.705	201.893	523.087	800.981	1025.22	470.636	158.176	783.096	4.9508	2.30766	2.91756e-10	4.06287e-08	chrIV	8645518	8648168	minus
WBGene00006772	4424	2092	1999	11104	6262	4524	2029.02	2323.11	2764.28	6252.27	6714.52	10238.6	5053.64	2372.14	7735.14	3.26083	1.70524	3.01717e-10	4.13744e-08	chrIII	8193777	8201138	minus
WBGene00001091	441	266	240	749	1171	1045	202.26	295.386	331.879	421.735	1255.62	2365.02	811.984	276.508	1347.46	4.87313	2.28485	3.18572e-10	4.33547e-08	chrIV	6613907	6618487	minus
WBGene00006064	503	299	271	1885	1009	938	230.695	332.032	374.747	1061.38	1081.91	2122.86	867.271	312.491	1422.05	4.55069	2.18609	3.24075e-10	4.37721e-08	chrX	5307464	5323353	minus
WBGene00001386	743	431	387	3030	1230	887	340.769	478.614	535.155	1706.09	1318.88	2007.44	1064.49	451.513	1677.47	3.71522	1.89345	3.50459e-10	4.66344e-08	chrIII	9081602	9082813	plus
WBGene00016578	24710	8930	5739	4470	3076	1077	11333	9916.54	7936.06	2516.9	3298.28	2437.45	6239.7	9728.52	2750.88	0.282764	-1.82233	3.63545e-10	4.76695e-08	chrII	3009185	3011575	plus
WBGene00009579	401	167	164	1339	691	508	183.914	185.449	226.784	753.944	740.934	1149.7	540.12	198.716	881.525	4.43611	2.14929	4.09298e-10	5.32799e-08	chrII	11142693	11150323	plus
WBGene00016292	7216	3318	3371	18839	9516	6995	3309.54	3684.55	4661.52	10607.6	10203.7	15831	8049.63	3885.2	12214.1	3.14374	1.65248	4.64599e-10	5.96147e-08	chrX	5138960	5146701	plus
WBGene00015270	4208	1783	1526	852	385	166	1929.95	1979.98	2110.2	479.731	412.822	375.688	1214.73	2006.71	422.747	0.210667	-2.24696	5.06519e-10	6.45327e-08	chrV	2501050	2502425	plus
WBGene00017489	96	71	59	608	338	216	44.0293	78.8437	81.5869	342.343	362.425	488.847	233.013	68.1533	397.872	5.83789	2.54545	5.63512e-10	7.12882e-08	chrIV	4293613	4299076	minus
WBGene00004719	5511	2663	2558	13803	7544	5414	2527.56	2957.19	3537.28	7771.98	8089.16	12252.9	6189.34	3007.34	9371.33	3.11615	1.63977	6.47138e-10	8.01737e-08	chrX	13487494	13500580	minus
WBGene00007153	192	151	113	1319	647	545	88.0586	167.682	156.26	742.682	693.755	1233.43	513.645	137.333	889.957	6.48027	2.69605	7.22148e-10	8.82494e-08	chrV	13134926	13138071	minus
WBGene00002178	2720	1273	1320	8261	3835	2852	1247.5	1413.63	1825.33	4651.48	4112.13	6454.59	3284.11	1495.49	5072.73	3.39202	1.76215	7.36247e-10	8.89513e-08	chrIV	6957630	6963705	plus
WBGene00021059	1592	822	737	4738	2078	1669	730.153	912.81	1019.15	2667.8	2228.16	3777.25	1889.22	887.369	2891.07	3.25802	1.704	7.71536e-10	9.17872e-08	chrX	5849069	5851936	plus
WBGene00045509	3483	1104	991	554	333	134	1597.44	1225.96	1370.38	311.938	357.064	303.266	861.009	1397.93	324.089	0.231835	-2.10883	7.79139e-10	9.2082e-08	chrI	12596520	12598906	minus
WBGene00013592	621	275	306	2005	977	807	284.815	305.38	423.146	1128.94	1047.6	1826.39	836.046	337.78	1334.31	3.95023	1.98194	9.16929e-10	1.06959e-07	chrII	13091517	13094202	plus
WBGene00006693	609	271	245	1452	1054	830	279.311	300.939	338.793	817.57	1130.17	1878.44	790.87	306.348	1275.39	4.16322	2.0577	9.49729e-10	1.1007e-07	chrV	13346265	13356088	plus
WBGene00044774	798	384	305	2256	1175	915	365.994	426.422	421.763	1270.27	1259.91	2070.81	969.196	404.726	1533.66	3.78939	1.92196	9.85005e-10	1.13427e-07	chrV	1315645	1317919	minus
WBGene00010907	273	151	149	974	604	445	125.208	167.682	206.042	548.425	647.647	1007.12	450.353	166.311	734.396	4.41581	2.14268	1.00075e-09	1.14506e-07	chrIII	4549031	4551473	plus
WBGene00012851	30551	12362	9393	6306	3999	1418	14011.9	13727.7	12988.9	3550.69	4287.98	3209.19	8629.39	13576.2	3682.62	0.271256	-1.88227	1.02655e-09	1.16715e-07	chrV	20722210	20723701	plus
WBGene00010128	177	132	102	1219	386	368	81.1791	146.583	141.049	686.376	413.894	832.851	383.655	122.937	644.373	5.2415	2.38998	1.04504e-09	1.17332e-07	chrIV	12962784	12964600	plus
WBGene00003835	7633	3033	2876	1792	762	274	3500.79	3368.07	3977.02	1009.01	817.065	620.112	2215.34	3615.29	815.396	0.225541	-2.14854	1.10475e-09	1.23265e-07	chrV	14416100	14417814	minus
WBGene00006662	641	172	189	1525	978	628	293.987	191.002	261.355	858.674	1048.67	1421.28	679.162	248.781	1109.54	4.45991	2.15701	1.21486e-09	1.33632e-07	chrIII	8633987	8643659	minus
WBGene00017792	105	54	44	403	290	279	48.1571	59.9656	60.8445	226.915	310.956	631.428	223.044	56.3224	389.766	6.92027	2.79083	1.21998e-09	1.33632e-07	chrV	7438303	7439914	plus
WBGene00013711	753	352	241	2026	1094	858	345.355	390.887	333.262	1140.77	1173.06	1941.81	887.523	356.501	1418.54	3.97907	1.99243	1.24506e-09	1.35553e-07	chrI	10323783	10327748	minus
WBGene00020581	8249	4029	3174	17747	11359	8123	3783.31	4474.1	4389.1	9992.71	12179.8	18383.8	8867.15	4215.5	13518.8	3.20692	1.68119	1.26164e-09	1.36531e-07	chrII	6637040	6643085	minus
WBGene00003057	556	435	342	2380	2760	2221	255.003	483.056	472.928	1340.09	2959.45	5026.53	1756.18	403.662	3108.69	7.70121	2.94509	1.30375e-09	1.40243e-07	chrV	12197414	12198606	minus
WBGene00017515	1023	426	382	2426	1605	1067	469.187	473.062	528.241	1365.99	1720.98	2414.81	1162.05	490.163	1833.93	3.74147	1.9036	1.32794e-09	1.41995e-07	chrX	8459769	8463277	minus
WBGene00020651	208	128	96	844	448	362	95.3969	142.141	132.752	475.227	480.374	819.272	357.527	123.43	591.624	4.79321	2.26099	1.34894e-09	1.43387e-07	chrIV	266448	268370	plus
WBGene00010252	1842	857	814	5102	2340	1772	844.813	951.677	1125.62	2872.76	2509.1	4010.36	2052.39	974.037	3130.74	3.21419	1.68445	1.39261e-09	1.47158e-07	chrV	9748041	9749203	plus
WBGene00044411	124	65	67	597	288	285	56.8712	72.1808	92.6496	336.15	308.812	645.007	251.945	73.9005	429.989	5.81849	2.54064	1.45959e-09	1.53333e-07	chrIII	5823913	5828392	plus
WBGene00022675	1112	596	579	3443	2039	1606	510.006	661.843	800.658	1938.63	2186.35	3634.67	1622.03	657.502	2586.55	3.9339	1.97596	1.55188e-09	1.62081e-07	chrIV	4489005	4506701	minus
WBGene00012704	568	262	292	1940	995	875	260.507	290.944	403.786	1092.35	1066.9	1980.28	849.128	318.412	1379.84	4.33351	2.11554	1.65675e-09	1.72034e-07	chrIV	12222848	12227030	minus
WBGene00007919	237	117	125	757	516	435	108.697	129.926	172.854	426.24	553.288	984.484	395.915	137.159	654.671	4.77308	2.25492	1.81029e-09	1.86897e-07	chrII	8707105	8708804	plus
WBGene00019111	207	85	108	877	438	363	94.9382	94.3903	149.346	493.808	469.652	821.535	353.945	112.891	594.998	5.27054	2.39795	1.87159e-09	1.91077e-07	chrV	8995078	8996382	plus
WBGene00013083	904	541	465	2944	1691	1158	414.609	600.767	643.016	1657.66	1813.2	2620.76	1291.67	552.797	2030.54	3.67321	1.87704	1.87642e-09	1.91077e-07	chrV	18480986	18487228	minus
WBGene00044414	1921	989	740	352	204	58	881.045	1098.26	1023.29	198.199	218.742	131.265	591.8	1000.87	182.735	0.182577	-2.45342	1.92176e-09	1.93947e-07	chrI	6004655	6007597	minus
WBGene00020757	26557	11106	10447	5840	1951	739	12180.1	12332.9	14446.4	3288.3	2091.99	1672.49	7668.7	12986.5	2350.93	0.181029	-2.46571	1.96481e-09	1.97184e-07	chrIII	879847	881496	plus
WBGene00019914	333	123	115	1187	540	341	152.727	136.588	159.025	668.358	579.022	771.745	411.244	149.447	673.042	4.50355	2.17106	2.03412e-09	2.03005e-07	chrIII	1002696	1006236	plus
WBGene00013119	132	79	73	528	358	310	60.5403	87.7275	100.947	297.298	383.87	701.586	271.995	83.0714	460.918	5.54846	2.47209	2.12656e-09	2.09898e-07	chrIV	16736231	16743055	plus
WBGene00019967	213	124	126	1180	433	343	97.6901	137.699	174.236	664.416	464.29	776.271	385.767	136.542	634.993	4.65054	2.2174	2.26362e-09	2.22206e-07	chrV	3800762	3803440	minus
WBGene00022295	175	106	88	667	498	289	80.2618	117.71	121.689	375.564	533.987	654.059	313.879	106.554	521.204	4.89147	2.29027	2.29019e-09	2.22616e-07	chrIV	2037191	2043191	plus
WBGene00006759	8463	3425	3369	15448	11472	8419	3881.46	3803.37	4658.75	8698.22	12301	19053.7	8732.76	4114.53	13351	3.24484	1.69815	2.29259e-09	2.22616e-07	chrIV	11972685	12010984	minus
WBGene00020125	902	413	389	2081	1455	1087	413.692	458.626	537.921	1171.74	1560.14	2460.08	1100.37	470.08	1730.65	3.68162	1.88034	2.45955e-09	2.37545e-07	chrX	7030158	7036044	minus
WBGene00007152	3973	1833	1583	10345	4499	3426	1822.17	2035.5	2189.02	5824.9	4824.11	7753.66	4074.89	2015.56	6134.23	3.04343	1.6057	2.54775e-09	2.42704e-07	chrV	13131913	13134843	minus
WBGene00008711	7686	3435	3185	17014	9999	7018	3525.1	3814.48	4404.31	9579.98	10721.6	15883	7988.07	3914.63	12061.5	3.08114	1.62346	2.5535e-09	2.42704e-07	chrIV	17444084	17450506	minus
WBGene00000645	286	194	201	2394	1022	741	131.171	215.432	277.949	1347.98	1095.85	1677.02	790.9	208.184	1373.62	6.59809	2.72205	2.70842e-09	2.53885e-07	chrII	303924	305530	minus
WBGene00007401	222	117	94	408	533	465	101.818	129.926	129.986	229.73	571.517	1052.38	369.226	120.576	617.875	5.12435	2.35737	2.71353e-09	2.53885e-07	chrIII	9681440	9682745	minus
WBGene00011439	611	378	239	1765	975	803	280.228	419.759	330.496	993.809	1045.46	1817.33	814.514	343.495	1285.53	3.74251	1.90401	3.17449e-09	2.92497e-07	chrV	11761873	11763049	minus
WBGene00010204	486	239	281	2075	1438	1181	222.898	265.403	388.575	1168.36	1541.92	2672.82	1043.33	292.292	1794.36	6.13894	2.61799	3.17507e-09	2.92497e-07	chrV	12003009	12004581	plus
WBGene00009158	10409	5520	4603	23503	14046	10272	4773.97	6129.82	6365.16	13233.7	15061	23247.4	11468.5	5756.32	17180.7	2.98467	1.57757	3.2823e-09	3.00155e-07	chrI	9762395	9767860	minus
WBGene00016886	12575	5633	3779	2861	1619	527	5767.38	6255.3	5225.71	1610.93	1735.99	1192.7	3631.34	5749.47	1513.21	0.263191	-1.92582	3.29161e-09	3.00155e-07	chrII	1849435	1850408	minus
WBGene00019001	5939	2886	2900	20778	6334	4781	2723.86	3204.83	4010.2	11699.4	6791.72	10820.3	6541.71	3312.96	9770.45	2.94916	1.5603	3.42242e-09	3.10507e-07	chrI	6569495	6572601	plus
WBGene00000244	889	414	335	2344	1172	1022	407.73	459.736	463.248	1319.82	1256.69	2312.97	1036.7	443.571	1629.83	3.67433	1.87748	3.55264e-09	3.20702e-07	chrV	6762459	6765055	minus
WBGene00015216	842	399	460	3994	1462	1347	386.174	443.079	636.101	2248.88	1567.65	3048.5	1388.4	488.452	2288.34	4.6849	2.22802	3.70834e-09	3.33083e-07	chrIV	7444623	7445354	minus
WBGene00009593	217	78	78	751	386	322	99.5246	86.617	107.861	422.862	413.894	728.744	309.917	98.0008	521.833	5.32479	2.41272	3.75758e-09	3.35827e-07	chrIII	9893067	9898338	plus
WBGene00016880	15940	5664	4276	3565	1937	619	7310.7	6289.73	5912.98	2007.33	2076.97	1400.91	4166.44	6504.47	1828.4	0.2811	-1.83085	3.77905e-09	3.36073e-07	chrII	1854390	1855365	plus
WBGene00017781	340	151	164	1311	515	390	155.937	167.682	226.784	738.178	552.216	882.641	453.906	183.468	724.345	3.94808	1.98115	4.14164e-09	3.64708e-07	chrX	811172	813125	minus
WBGene00015815	16935	6084	4554	4062	1773	741	7767.05	6756.13	6297.4	2287.17	1901.12	1677.02	4447.65	6940.19	1955.1	0.281707	-1.82773	4.29451e-09	3.76324e-07	chrII	4238176	4244835	plus
WBGene00000136	274	207	148	1425	743	621	125.667	229.868	204.659	802.367	796.692	1405.44	594.115	186.731	1001.5	5.36331	2.42312	4.57969e-09	3.97438e-07	chrX	4565276	4569534	plus
WBGene00008495	88	86	72	1158	591	475	40.3602	95.5008	99.5637	652.029	633.708	1075.01	432.695	78.4749	786.916	10.0276	3.32591	4.90433e-09	4.23565e-07	chrII	14001611	14002226	minus
WBGene00011331	2667	1322	1297	6918	3665	2692	1223.19	1468.05	1793.53	3895.28	3929.85	6092.48	3067.06	1494.92	4639.2	3.10331	1.63381	5.24832e-09	4.49143e-07	chrII	10206655	10209331	plus
WBGene00006632	134	65	69	574	324	252	61.4576	72.1808	95.4152	323.199	347.413	570.322	244.998	76.3512	413.645	5.41766	2.43767	5.25051e-09	4.49143e-07	chrX	2820440	2822019	plus
WBGene00011433	567	347	290	1624	1050	819	260.048	385.335	401.02	914.417	1125.88	1853.55	823.374	348.801	1297.95	3.72117	1.89575	5.63388e-09	4.79654e-07	chrI	13310885	13318693	minus
WBGene00004793	701	331	311	1849	1090	808	321.506	367.567	430.06	1041.11	1168.77	1828.65	859.61	373.044	1346.17	3.60862	1.85145	5.77398e-09	4.86966e-07	chrV	12973245	12976688	minus
WBGene00003741	315	156	180	1494	671	595	144.471	173.234	248.909	841.219	719.489	1346.59	578.986	188.871	969.1	5.131	2.35924	6.02193e-09	5.05505e-07	chrX	13177785	13178385	minus
WBGene00021928	552	226	196	1335	868	665	253.169	250.967	271.035	751.691	930.725	1505.02	660.434	258.39	1062.48	4.11191	2.03981	6.20109e-09	5.18123e-07	chrIV	1038669	1041008	minus
WBGene00015632	1537	604	590	3882	1747	1410	704.928	670.727	815.869	2185.82	1873.24	3191.09	1573.61	730.508	2416.72	3.30827	1.72608	6.29718e-09	5.23573e-07	chrI	5497781	5506518	plus
WBGene00009957	347	220	199	1594	661	668	159.148	244.304	275.183	897.525	708.766	1511.8	632.789	226.212	1039.37	4.59466	2.19996	6.51759e-09	5.34092e-07	chrIV	12526225	12527317	minus
WBGene00022689	6029	2050	1487	1016	764	334	2765.13	2276.47	2056.27	572.074	819.209	755.902	1540.84	2365.96	715.729	0.302511	-1.72494	6.53698e-09	5.34092e-07	chrII	1944063	1947916	minus
WBGene00014164	1615	891	787	3903	2403	1794	740.702	989.433	1088.29	2197.64	2576.65	4060.15	1942.14	939.474	2944.81	3.13453	1.64825	6.54088e-09	5.34092e-07	chrII	10094812	10098726	plus
WBGene00016335	406	205	172	1021	758	580	186.207	227.647	237.847	574.889	812.776	1312.65	558.669	217.234	900.103	4.14348	2.05084	6.68573e-09	5.4345e-07	chrII	2176897	2181980	plus
WBGene00019828	167	101	85	627	436	290	76.5927	112.158	117.54	353.042	467.507	656.323	297.194	102.097	492.29	4.82179	2.26957	6.74445e-09	5.45753e-07	chrX	4003511	4007613	plus
WBGene00013819	2029	782	626	6084	1720	1414	930.578	868.391	865.651	3425.69	1844.29	3200.14	1855.79	888.207	2823.37	3.17873	1.66845	7.18396e-09	5.76128e-07	chrV	19727451	19727892	plus
WBGene00004058	509	288	232	1380	891	678	233.447	319.817	320.816	777.029	955.387	1534.44	690.156	291.36	1088.95	3.73748	1.90206	7.99599e-09	6.384e-07	chrII	6880657	6883710	minus
WBGene00001242	1804	914	908	5840	2258	1823	827.384	1014.97	1255.61	3288.3	2421.17	4125.78	2155.54	1032.66	3278.42	3.17474	1.66664	8.08181e-09	6.40921e-07	chrIII	9332244	9334191	minus
WBGene00019998	230	137	143	896	775	630	105.487	152.135	197.745	504.506	831.004	1425.8	536.113	151.789	920.438	6.06394	2.60026	8.09892e-09	6.40921e-07	chrII	7494415	7496130	plus
WBGene00000233	276	174	170	1070	848	747	126.584	193.223	235.081	602.479	909.28	1690.6	626.207	184.963	1067.45	5.77118	2.52887	8.24099e-09	6.49303e-07	chrV	13498772	13511705	minus
WBGene00008229	83	71	63	700	486	439	38.067	78.8437	87.1182	394.145	521.12	993.537	352.138	68.0096	636.267	9.35554	3.22582	8.52022e-09	6.68372e-07	chrV	9526709	9529226	plus
WBGene00044463	218	148	140	1460	517	515	99.9832	164.35	193.596	822.074	554.36	1165.54	499.984	152.643	847.324	5.55101	2.47275	8.56842e-09	6.69231e-07	chrIV	1219333	1221206	minus
WBGene00003178	122	82	80	708	370	356	55.9539	91.0589	110.626	398.65	396.738	805.692	309.787	85.8797	533.693	6.21443	2.63562	8.62678e-09	6.70872e-07	chrIV	7983850	7987171	minus
WBGene00020086	111	86	68	519	366	351	50.9089	95.5008	94.0324	292.231	392.449	794.377	286.583	80.1474	493.019	6.1514	2.62091	8.6862e-09	6.72582e-07	chrX	17483265	17486756	minus
WBGene00017374	2144	940	967	6470	2227	1565	983.321	1043.85	1337.2	3643.03	2387.93	3541.88	2156.2	1121.45	3190.95	2.84536	1.50861	8.76659e-09	6.75893e-07	chrII	4727315	4727868	minus
WBGene00017942	4160	1459	1136	704	553	184	1907.94	1620.18	1570.89	396.398	592.962	416.425	1084.13	1699.67	468.595	0.275697	-1.85884	9.47158e-09	7.27126e-07	chrX	1779433	1780522	plus
WBGene00013081	4845	2105	2247	12836	5239	4691	2222.1	2337.55	3107.22	7227.5	5617.59	10616.6	5188.09	2555.62	7820.56	3.06014	1.6136	9.84411e-09	7.52509e-07	chrV	18582600	18582924	plus
WBGene00000490	1625	868	683	3121	2610	1798	745.288	963.892	944.472	1757.32	2798.61	4069.2	1879.8	884.551	2875.04	3.25029	1.70057	1.015e-08	7.72603e-07	chrV	12144276	12150670	minus
WBGene00012256	29873	16122	14193	70037	39658	28130	13700.9	17903.1	19626.5	39435.4	42523.8	63663.3	32808.8	17076.8	48540.8	2.8425	1.50716	1.02278e-08	7.75243e-07	chrX	11062066	11064474	plus
WBGene00007191	1448	710	631	3726	1841	1411	664.109	788.437	872.565	2097.98	1974.04	3193.35	1598.41	775.037	2421.79	3.12474	1.64374	1.06406e-08	8.03145e-07	chrII	11340070	11343466	minus
WBGene00018985	1199	510	509	3321	1385	1069	549.908	566.342	703.86	1869.94	1485.09	2419.34	1265.75	606.703	1924.79	3.17254	1.66564	1.0829e-08	8.13075e-07	chrX	859947	862457	plus
WBGene00012916	22804	9090	6844	5534	3083	977	10458.8	10094.2	9464.08	3116	3305.79	2211.13	6441.67	10005.7	2877.64	0.2876	-1.79786	1.13429e-08	8.45492e-07	chrII	12850365	12851833	plus
WBGene00018791	208	121	122	803	565	338	95.3969	134.367	168.705	452.141	605.829	764.955	370.232	132.823	607.642	4.57482	2.19371	1.15426e-08	8.56747e-07	chrI	5014351	5016260	minus
WBGene00044202	1815	720	405	169	190	61	832.429	799.542	560.046	95.1579	203.73	138.054	438.16	730.672	145.647	0.199333	-2.32674	1.15893e-08	8.56747e-07	chrV	17273499	17274992	plus
WBGene00009515	124	50	61	500	268	257	56.8712	55.5237	84.3526	281.532	287.367	581.638	224.547	65.5825	383.512	5.84778	2.54789	1.16642e-08	8.5875e-07	chrIV	1266866	1274371	plus
WBGene00011287	147	47	53	487	324	247	67.4199	52.1923	73.2899	274.213	347.413	559.006	228.922	64.3007	393.544	6.12037	2.61362	1.23066e-08	9.02351e-07	chrV	12882018	12885946	minus
WBGene00016717	5000	1948	1263	358	524	238	2293.19	2163.2	1746.51	201.577	561.866	538.637	1250.83	2067.64	434.027	0.209914	-2.25213	1.31614e-08	9.61101e-07	chrII	1905434	1998538	plus
WBGene00001479	2563	1630	1553	12313	6169	4608	1175.49	1810.07	2147.53	6933.02	6614.79	10428.7	4851.61	1711.03	7992.18	4.67097	2.22372	1.33505e-08	9.70963e-07	chrV	13603283	13606691	minus
WBGene00010811	925	336	351	2292	1172	843	424.241	373.119	485.373	1290.54	1256.69	1907.86	956.305	427.578	1485.03	3.47313	1.79624	1.39762e-08	1.00427e-06	chrIII	3510924	3519594	minus
WBGene00010652	271	160	150	804	597	447	124.291	177.676	207.424	452.704	640.141	1011.64	435.646	169.797	701.496	4.13138	2.04662	1.43476e-08	1.02685e-06	chrI	11483382	11484561	plus
WBGene00020143	709	434	378	2279	1287	1097	325.175	481.946	522.709	1283.22	1380	2482.71	1079.29	443.277	1715.31	3.86962	1.95219	1.45437e-08	1.03676e-06	chrX	16786371	16787547	plus
WBGene00018726	131	102	90	907	475	469	60.0817	113.268	124.455	510.7	509.325	1061.43	396.544	99.2682	693.819	6.98934	2.80516	1.56346e-08	1.11012e-06	chrX	8708313	8709318	plus
WBGene00020330	2641	1400	1294	5832	3926	2921	1211.26	1554.66	1789.38	3283.79	4209.71	6610.75	3109.93	1518.44	4701.42	3.09622	1.63051	1.57532e-08	1.11414e-06	chrX	6300104	6305182	plus
WBGene00007254	377	197	202	1370	632	416	172.907	218.763	279.332	771.399	677.671	941.483	510.259	223.667	796.851	3.56266	1.83296	1.60501e-08	1.13068e-06	chrI	7210541	7212697	plus
WBGene00010293	2914	1044	952	584	313	111	1336.47	1159.34	1316.45	328.83	335.619	251.213	787.987	1270.75	305.22	0.240188	-2.05776	1.61344e-08	1.13218e-06	chrV	17656819	17658174	minus
WBGene00013306	1537	765	664	276	178	70	704.928	849.513	918.199	155.406	190.863	158.423	496.222	824.213	168.23	0.20411	-2.29258	1.62365e-08	1.13491e-06	chrIV	14781805	14783363	plus
WBGene00004364	2830	1550	1523	8152	5289	4596	1297.95	1721.24	2106.05	4590.1	5671.2	10401.6	4298.02	1708.41	6887.63	4.0316	2.01135	1.64713e-08	1.14686e-06	chrV	10261105	10270289	minus
WBGene00044564	1029	356	405	2967	992	840	471.939	395.329	560.046	1670.61	1063.69	1901.07	1010.45	475.771	1545.12	3.24762	1.69938	1.69224e-08	1.16921e-06	chrX	3424803	3427324	plus
WBGene00020029	1411	518	570	3405	1596	1286	647.139	575.226	788.213	1917.24	1711.33	2910.45	1424.93	670.193	2179.67	3.25231	1.70146	1.71946e-08	1.18346e-06	chrII	6023294	6024980	minus
WBGene00017449	397	100	113	940	578	442	182.08	111.047	156.26	529.281	619.768	1000.33	433.127	149.796	716.458	4.78291	2.25789	1.74566e-08	1.19691e-06	chrX	6921607	6924411	minus
WBGene00044484	215	134	142	927	818	722	98.6073	148.804	196.362	521.961	877.112	1634.02	579.477	147.924	1011.03	6.83478	2.7729	1.8797e-08	1.27905e-06	chrIV	5040918	5045388	minus
WBGene00002041	515	238	164	1176	904	555	236.199	264.293	226.784	662.164	969.326	1256.07	602.472	242.425	962.519	3.97037	1.98927	1.92728e-08	1.30145e-06	chrIV	429214	440544	minus
WBGene00022055	3787	2527	1828	904	499	210	1736.86	2806.17	2527.81	509.01	535.06	475.268	1431.7	2356.95	506.446	0.214874	-2.21844	1.93598e-08	1.30145e-06	chrIII	1538462	1540196	minus
WBGene00001795	773	470	441	2547	1914	1437	354.528	521.923	609.828	1434.13	2052.31	3252.19	1370.82	495.426	2246.21	4.53389	2.18075	1.966e-08	1.31291e-06	chrIV	11248880	11259443	minus
WBGene00003565	147	75	57	427	403	267	67.4199	83.2856	78.8213	240.429	432.122	604.269	251.058	76.5089	425.607	5.56284	2.47582	1.98605e-08	1.32138e-06	chrX	1054211	1056686	plus
WBGene00018099	1904	1211	1264	473	186	80	873.248	1344.78	1747.9	266.33	199.441	181.054	768.792	1321.98	215.608	0.163095	-2.61621	2.02713e-08	1.34374e-06	chrV	2090139	2091756	plus
WBGene00015619	1182	520	562	2781	1637	1246	542.111	577.447	777.15	1565.88	1755.3	2819.92	1339.63	632.236	2047.03	3.23777	1.695	2.03674e-08	1.34515e-06	chrIV	7658723	7664151	plus
WBGene00013960	662	425	340	2196	1180	852	303.619	471.952	470.162	1236.49	1265.27	1928.23	945.954	415.244	1476.66	3.55613	1.83031	2.12979e-08	1.40145e-06	chrI	8270389	8273476	plus
WBGene00010111	5020	2399	1954	10480	6373	4266	2302.37	2664.03	2702.05	5900.92	6833.54	9654.73	5009.6	2556.15	7463.06	2.91965	1.5458	2.1563e-08	1.41372e-06	chrI	7889351	7894850	plus
WBGene00021089	203	58	79	589	438	256	93.1037	64.4075	109.244	331.645	469.652	579.374	274.571	88.9182	460.224	5.17581	2.37178	2.18846e-08	1.4244e-06	chrIV	3292117	3294630	plus
WBGene00010660	404	273	229	1555	887	828	185.29	303.16	316.668	875.566	951.098	1873.91	750.949	268.372	1233.53	4.59632	2.20048	2.24257e-08	1.45435e-06	chrIV	12887036	12890486	minus
WBGene00011054	3561	1151	1121	788	319	164	1633.21	1278.16	1550.15	443.695	342.052	371.162	936.405	1487.17	385.636	0.259308	-1.94726	2.40134e-08	1.54616e-06	chrII	13758345	13761158	plus
WBGene00015504	5619	2961	2381	975	880	437	2577.09	3288.11	3292.52	548.988	943.592	989.01	1939.89	3052.57	827.197	0.270983	-1.88372	2.42328e-08	1.54918e-06	chrI	5978692	5985873	minus
WBGene00022155	740	338	366	2225	927	766	339.393	375.34	506.115	1252.82	993.988	1733.6	866.875	406.95	1326.8	3.26036	1.70503	2.46628e-08	1.57107e-06	chrI	1667503	1669776	plus
WBGene00018416	56851	24576	19821	13177	8695	3728	26074.1	27291	27409.1	7419.5	9323.33	8437.14	17659	26924.7	8393.33	0.311733	-1.68162	2.54622e-08	1.61627e-06	chrIII	8853722	8861309	plus
WBGene00011971	8714	4872	4049	18211	12004	8219	3996.58	5410.23	5599.08	10254	12871.5	18601.1	9455.4	5001.96	13908.8	2.78068	1.47544	2.56075e-08	1.61977e-06	chrI	7684878	7689399	minus
WBGene00011392	2718	1483	1333	6949	3614	2711	1246.58	1646.83	1843.31	3912.74	3875.16	6135.48	3110.02	1578.91	4641.13	2.93945	1.55555	2.58619e-08	1.63012e-06	chrV	20827684	20828855	minus
WBGene00012429	343	260	214	1868	1013	982	157.313	288.723	295.925	1051.8	1086.2	2222.44	850.402	247.321	1453.48	5.87692	2.55506	2.74247e-08	1.72258e-06	chrIV	9244495	9245507	minus
WBGene00003850	196	112	128	1100	624	453	89.8932	124.373	177.002	619.371	669.093	1025.22	450.826	130.423	771.228	5.91329	2.56396	2.76175e-08	1.72865e-06	chrV	13246869	13249520	minus
WBGene00020194	15593	7092	6295	36589	16267	11662	7151.55	7875.48	8704.91	20602	17442.5	26393.2	14694.9	7910.65	21479.2	2.71523	1.44107	2.80435e-08	1.74921e-06	chrX	2608220	2609981	plus
WBGene00012255	28955	14048	12688	65743	33648	22625	13279.9	15599.9	17545.3	37017.6	36079.5	51204.5	28454.5	15475.1	41433.9	2.67746	1.42087	2.86104e-08	1.77226e-06	chrX	11059928	11061802	plus
WBGene00022562	1241	774	585	2810	2087	1602	569.171	859.507	808.955	1582.21	2237.81	3625.62	1613.88	745.878	2481.88	3.32746	1.73442	2.88907e-08	1.78348e-06	chrII	1656269	1657310	minus
WBGene00010597	383	97	117	1418	368	279	175.659	107.716	161.791	798.426	394.593	631.428	378.269	148.389	608.149	4.09835	2.03504	3.09432e-08	1.90364e-06	chrV	9489910	9491468	minus
WBGene00022391	186	141	126	1242	583	440	85.3068	156.577	174.236	699.326	625.13	995.8	456.063	138.707	773.419	5.57593	2.47921	3.1742e-08	1.94612e-06	chrI	912418	926880	minus
WBGene00012247	4497	1811	1586	901	664	229	2062.5	2011.07	2193.17	507.321	711.983	518.268	1334.05	2088.91	579.191	0.277269	-1.85064	3.23436e-08	1.97626e-06	chrV	19739660	19741068	minus
WBGene00012857	609	236	242	1539	816	646	279.311	262.072	334.645	866.557	874.967	1462.01	679.928	292.009	1067.85	3.65689	1.87062	3.27099e-08	1.99187e-06	chrV	20915455	20922707	plus
WBGene00006774	1360	620	648	3022	1846	1406	623.749	688.494	896.073	1701.58	1979.4	3182.03	1511.89	736.105	2287.67	3.1078	1.6359	3.47475e-08	2.1088e-06	chrI	4897368	4900978	minus
WBGene00007754	293	217	180	728	1014	944	134.381	240.973	248.909	409.911	1087.28	2136.44	709.649	208.088	1211.21	5.82067	2.54118	3.50706e-08	2.12124e-06	chrV	12138232	12140259	plus
WBGene00019866	1246	593	628	3375	1913	1361	571.464	658.511	868.417	1900.34	2051.24	3080.19	1521.69	699.464	2343.92	3.35103	1.7446	3.5222e-08	2.12325e-06	chrX	2467343	2471300	minus
WBGene00020114	4402	2086	1974	7729	6099	4311	2018.93	2316.45	2729.7	4351.93	6539.74	9756.57	4618.89	2355.03	6882.75	2.92258	1.54724	3.66453e-08	2.20166e-06	chrII	7627202	7651188	minus
WBGene00000241	1539	688	595	3569	1944	1297	705.845	764.006	822.783	2009.58	2084.48	2935.35	1553.67	764.212	2343.13	3.06608	1.6164	3.68367e-08	2.20578e-06	chrI	14371129	14376005	minus
WBGene00000481	120	48	63	474	297	207	55.0366	53.3028	87.1182	266.893	318.462	468.478	208.215	65.1526	351.278	5.39162	2.43072	3.70096e-08	2.20877e-06	chrIV	3613782	3624692	minus
WBGene00009730	1858	958	879	3599	2837	1922	852.151	1063.83	1215.51	2026.47	3042.01	4349.83	2091.63	1043.83	3139.44	3.00761	1.58862	3.7826e-08	2.25002e-06	chrIII	13409820	13423436	plus
WBGene00012130	1407	648	740	6207	1764	1224	645.305	719.587	1023.29	3494.94	1891.47	2770.13	1757.46	796.062	2718.85	3.41537	1.77204	3.82159e-08	2.26571e-06	chrIV	17288134	17291696	minus
WBGene00012118	372	189	92	708	614	542	170.614	209.88	127.22	398.65	658.37	1226.64	465.23	169.238	761.221	4.49794	2.16926	3.85498e-08	2.27799e-06	chrIV	8816322	8818512	plus
WBGene00001669	2188	1117	846	5332	2745	1689	1003.5	1240.4	1169.87	3002.26	2943.36	3822.51	2196.99	1137.93	3256.05	2.86139	1.51672	3.95351e-08	2.32094e-06	chrIV	10403998	10408245	plus
WBGene00000402	1012	543	432	2420	1432	1052	464.142	602.988	597.382	1362.62	1535.48	2380.87	1157.25	554.837	1759.65	3.17148	1.66516	4.11512e-08	2.40795e-06	chrIV	2436514	2463368	minus
WBGene00009843	632	291	259	1586	898	686	289.86	323.148	358.153	893.021	962.893	1552.54	729.936	323.72	1136.15	3.50967	1.81134	4.14193e-08	2.41577e-06	chrX	11451973	11454130	minus
WBGene00006761	2323	1088	917	5899	2500	1790	1065.42	1208.2	1268.05	3321.52	2680.66	4051.09	2265.82	1180.56	3351.09	2.83857	1.50516	4.19075e-08	2.43633e-06	chrIV	7980000	7982260	plus
WBGene00007375	1525	683	646	4433	1426	1180	699.424	758.454	893.308	2496.07	1529.05	2670.55	1507.81	783.729	2231.89	2.84778	1.50984	4.36679e-08	2.51606e-06	chrII	9373232	9374795	plus
WBGene00010344	79	52	43	340	235	214	36.2325	57.7447	59.4617	191.442	251.982	484.321	180.197	51.1463	309.248	6.04635	2.59606	4.44699e-08	2.55016e-06	chrX	10546000	10548900	plus
WBGene00013024	27479	8649	7692	7088	3349	1323	12602.9	9604.49	10636.7	3991	3591.01	2994.19	7236.73	10948	3525.4	0.322012	-1.63481	4.45753e-08	2.55016e-06	chrV	14347759	14350502	plus
WBGene00001592	184	73	102	867	474	333	84.3895	81.0646	141.049	488.177	508.253	753.639	342.762	102.168	583.356	5.7098	2.51344	4.49894e-08	2.56568e-06	chrI	4885188	4887966	minus
WBGene00003572	183	52	44	476	307	291	83.9309	57.7447	60.8445	268.019	329.185	658.586	243.052	67.5067	418.596	6.20082	2.63246	4.52705e-08	2.57354e-06	chrIII	9715799	9720207	minus
WBGene00011678	123	57	64	573	226	221	56.4126	63.297	88.5011	322.636	242.332	500.163	212.224	69.4036	355.044	5.11564	2.35491	4.62293e-08	2.61976e-06	chrII	9775076	9775824	minus
WBGene00013328	1238	683	613	2935	1901	1202	567.795	758.454	847.674	1652.59	2038.37	2720.34	1430.87	724.641	2137.1	2.94919	1.56032	4.74456e-08	2.68023e-06	chrIV	14637723	14641200	plus
WBGene00015294	537	165	148	1049	663	638	246.289	183.228	204.659	590.655	710.911	1443.91	563.275	211.392	915.158	4.3292	2.1141	4.84968e-08	2.73103e-06	chrX	7435752	7437936	minus
WBGene00013054	938	1062	1292	317	202	71	430.203	1179.32	1786.62	178.492	216.597	160.686	658.653	1132.05	185.258	0.163649	-2.61133	5.15993e-08	2.88763e-06	chrV	14781478	14782261	plus
WBGene00006960	412	169	130	984	619	490	188.959	187.67	179.768	554.056	663.731	1108.96	480.524	185.466	775.582	4.18181	2.06413	5.36338e-08	2.98362e-06	chrV	14980337	14982609	plus
WBGene00018590	114	52	60	420	303	215	52.2848	57.7447	82.9698	236.487	324.896	486.584	206.828	64.3331	349.322	5.4299	2.44093	5.36466e-08	2.98362e-06	chrX	2163376	2164063	plus
WBGene00004233	4188	1797	1636	9706	4441	3050	1920.78	1995.52	2262.31	5465.11	4761.92	6902.7	3884.72	2059.54	5709.91	2.77242	1.47115	5.51382e-08	3.05711e-06	chrIII	10781782	10791077	plus
WBGene00022322	2842	1498	1189	590	455	160	1303.45	1663.49	1644.18	332.208	487.88	362.109	965.554	1537.04	394.066	0.256379	-1.96365	5.78038e-08	3.18524e-06	chrIII	1346307	1347120	minus
WBGene00017513	1835	934	887	4495	2321	1632	841.602	1037.18	1226.57	2530.98	2488.72	3693.51	1969.76	1035.12	2904.4	2.80587	1.48845	5.85407e-08	3.21598e-06	chrX	8447221	8450353	plus
WBGene00016455	18048	7215	4719	3761	3108	1005	8277.51	8012.07	6525.57	2117.69	3332.6	2274.5	5089.99	7605.05	2574.93	0.338581	-1.56243	6.17479e-08	3.38183e-06	chrI	10836975	10838866	plus
WBGene00019908	313	143	137	607	698	427	143.554	158.798	189.448	341.78	748.44	966.378	424.733	163.933	685.533	4.18178	2.06412	6.23351e-08	3.40361e-06	chrIII	6798085	6800184	plus
WBGene00019682	315	243	152	1363	861	690	144.471	269.845	210.19	767.457	923.219	1561.59	646.13	208.169	1084.09	5.20775	2.38066	6.50273e-08	3.53985e-06	chrIII	8048358	8051089	minus
WBGene00001044	1235	606	614	173	182	66	566.419	672.948	849.057	97.4102	195.152	149.37	421.726	696.141	147.311	0.21161	-2.24052	6.55064e-08	3.55516e-06	chrIV	12251161	12252641	minus
WBGene00001816	8860	3657	2810	1944	1328	575	4063.54	4061.01	3885.75	1094.6	1423.97	1301.33	2638.36	4003.43	1273.3	0.318052	-1.65267	6.82522e-08	3.69302e-06	chrI	1162892	1175871	minus
WBGene00009791	830	527	491	3432	1819	1407	380.67	585.22	678.969	1932.44	1950.45	3184.3	1452.01	548.286	2355.73	4.29653	2.10317	6.87234e-08	3.70735e-06	chrV	11667473	11669372	plus
WBGene00011508	14426	7924	7350	44491	17301	14894	6616.32	8799.4	10163.8	25051.3	18551.2	33707.8	17148.3	8526.51	25770.1	3.02235	1.59567	7.1187e-08	3.80175e-06	chrII	8048997	8050511	minus
WBGene00003707	344	240	168	1412	509	448	157.772	266.514	232.315	795.047	545.782	1013.91	501.889	218.867	784.912	3.58625	1.84248	7.1377e-08	3.80175e-06	chrV	1619194	1621536	minus
WBGene00018971	253	130	129	779	424	398	116.036	144.362	178.385	438.627	454.64	900.746	372.133	146.261	598.004	4.08862	2.03161	7.15315e-08	3.80175e-06	chrIV	3922159	3925043	plus
WBGene00019754	102	95	56	651	470	464	46.7812	105.495	77.4384	366.555	503.964	1050.12	358.392	76.5716	640.212	8.36096	3.06367	7.18479e-08	3.8073e-06	chrV	5617638	5618325	plus
WBGene00003175	3929	2061	2008	12087	4918	3661	1801.99	2288.69	2776.72	6805.76	5273.39	8285.51	4538.68	2289.13	6788.22	2.96541	1.56823	7.29472e-08	3.84288e-06	chrIII	3131566	3139213	minus
WBGene00019037	20640	11881	8384	2874	3361	1279	9466.3	13193.5	11593.6	1618.25	3603.88	2894.61	7061.7	11417.8	2705.58	0.236961	-2.07728	7.4222e-08	3.88724e-06	chrII	1676417	1677297	plus
WBGene00017429	5714	2703	2646	12811	6443	4703	2620.66	3001.61	3658.97	7213.42	6908.6	10643.7	5674.5	3093.75	8255.25	2.66837	1.41596	7.51773e-08	3.90393e-06	chrX	5831883	5834820	minus
WBGene00044107	603	277	311	2608	632	545	276.559	307.601	430.06	1468.47	677.671	1233.43	732.3	338.073	1126.53	3.33219	1.73647	7.51926e-08	3.90393e-06	chrIV	9651409	9652467	plus
WBGene00013860	5246	2038	1919	11835	5394	3377	2406.02	2263.15	2653.65	6663.87	5783.79	7642.76	4568.87	2440.94	6696.81	2.74354	1.45604	7.65124e-08	3.96101e-06	chrI	10255623	10262197	minus
WBGene00022101	4032	1230	1238	952	404	183	1849.23	1365.88	1711.94	536.038	433.195	414.162	1051.74	1642.35	461.131	0.280775	-1.83251	7.93278e-08	4.09496e-06	chrIV	2610420	2612440	plus
WBGene00009547	312	184	178	807	781	536	143.095	204.327	246.144	454.393	837.438	1213.07	516.41	197.855	834.965	4.22008	2.07727	8.01281e-08	4.12442e-06	chrIV	11844424	11846327	plus
WBGene00007083	533	725	772	164	112	63	244.454	805.094	1067.54	92.3426	120.094	142.58	412.018	705.698	118.339	0.167691	-2.57613	8.08454e-08	4.14945e-06	chrV	14156816	14157607	plus
WBGene00009144	585	389	315	1829	1263	912	268.304	431.975	435.591	1029.85	1354.27	2064.02	930.667	378.623	1482.71	3.91606	1.9694	8.44128e-08	4.30793e-06	chrI	7670322	7672709	minus
WBGene00020083	3036	1260	1174	6464	3267	2469	1392.43	1399.2	1623.44	3639.65	3503.09	5587.79	2857.6	1471.69	4243.51	2.88343	1.52779	8.55236e-08	4.35225e-06	chrX	297248	299286	plus
WBGene00044502	193	88	107	678	452	275	88.5173	97.7218	147.963	381.758	484.663	622.375	303.833	111.401	496.265	4.45478	2.15535	8.77171e-08	4.41831e-06	chrIV	6010283	6010870	minus
WBGene00021719	17612	7003	5426	4420	2760	836	8077.55	7776.65	7503.23	2488.75	2959.45	1892.02	5116.27	7785.81	2446.74	0.314256	-1.66999	8.77769e-08	4.41831e-06	chrII	3475647	3477191	minus
WBGene00018517	1144	609	554	2335	1739	1238	524.683	676.279	766.087	1314.76	1864.67	2801.82	1324.71	655.683	1993.75	3.04072	1.60441	8.78054e-08	4.41831e-06	chrX	5797349	5798740	minus
WBGene00016044	323	146	118	781	514	446	148.14	162.129	163.174	439.754	551.144	1009.38	412.287	157.814	666.759	4.22495	2.07893	8.89905e-08	4.46543e-06	chrV	9191591	9195840	plus
WBGene00002057	1729	913	933	5203	3032	2361	792.986	1013.86	1290.18	2929.63	3251.1	5343.37	2436.85	1032.34	3841.37	3.72102	1.8957	9.00199e-08	4.5006e-06	chrX	8820574	8824395	minus
WBGene00011049	21371	10174	7994	5510	3540	1289	9801.57	11298	11054.3	3102.49	3795.81	2917.24	6994.9	10718	3271.85	0.305268	-1.71185	9.01923e-08	4.5006e-06	chrII	14381552	14383234	plus
WBGene00009408	1111	605	564	3201	1357	1145	509.548	671.837	779.916	1802.37	1455.06	2591.34	1301.68	653.767	1949.59	2.98209	1.57632	9.06747e-08	4.51214e-06	chrI	9813031	9823439	minus
WBGene00001594	1018	419	461	2313	1316	971	466.894	465.289	637.484	1302.37	1411.1	2197.55	1080.11	523.222	1637.01	3.1287	1.64556	9.28589e-08	4.59536e-06	chrII	7172163	7174897	minus
WBGene00012648	1313	825	764	4025	3734	2238	602.193	916.141	1056.48	2266.34	4003.83	5065	2318.33	858.272	3778.39	4.40232	2.13826	9.4173e-08	4.64759e-06	chrIII	10629970	10633402	minus
WBGene00011454	396	268	252	1972	1023	832	181.621	297.607	348.473	1110.36	1096.93	1882.97	819.66	275.9	1363.42	4.94171	2.30501	9.80627e-08	4.8263e-06	chrIV	9560770	9566588	minus
WBGene00019243	8807	3548	2167	1563	1476	581	4039.23	3939.96	2996.59	880.07	1582.66	1314.91	2458.9	3658.6	1259.21	0.344179	-1.53877	1.01567e-07	4.98509e-06	chrV	722696	723828	minus
WBGene00009500	1571	718	495	3349	1788	1346	720.521	797.321	684.5	1885.7	1917.21	3046.24	1508.58	734.114	2283.05	3.10994	1.63689	1.08837e-07	5.32471e-06	chrI	9254506	9261633	minus
WBGene00010274	131	108	60	885	314	214	60.0817	119.931	82.9698	498.312	336.691	484.321	263.718	87.6609	439.775	5.01677	2.32676	1.09079e-07	5.32471e-06	chrIV	9653518	9654210	plus
WBGene00008900	217	124	76	670	424	289	99.5246	137.699	105.095	377.253	454.64	654.059	304.712	114.106	495.317	4.34085	2.11798	1.10347e-07	5.37202e-06	chrV	18222770	18224419	minus
WBGene00021950	3934	2044	1918	8839	5070	3738	1804.28	2269.81	2652.27	4976.93	5436.38	8459.77	4266.57	2242.12	6291.03	2.80584	1.48843	1.11993e-07	5.43742e-06	chrIV	698696	707719	minus
WBGene00001387	2854	1656	1702	23735	2672	3260	1308.95	1838.95	2353.58	13364.3	2865.09	7377.97	4851.48	1833.83	7869.13	4.2911	2.10135	1.12319e-07	5.43855e-06	chrV	12996803	12997509	minus
WBGene00019484	438	180	152	1255	647	349	200.884	199.885	210.19	706.646	693.755	789.85	466.868	203.653	730.084	3.58494	1.84195	1.12867e-07	5.45037e-06	chrII	4031170	4032651	minus
WBGene00008776	4249	2319	2145	11170	5735	4299	1948.76	2575.19	2966.17	6289.43	6149.43	9729.42	4943.07	2496.7	7389.43	2.95967	1.56544	1.14639e-07	5.50636e-06	chrIV	10990976	10994116	plus
WBGene00017580	233	111	105	663	476	304	106.863	123.263	145.197	373.312	510.398	688.007	324.507	125.108	523.905	4.18764	2.06614	1.17974e-07	5.64213e-06	chrX	9235049	9242216	minus
WBGene00008865	10322	5285	4667	23310	11440	8088	4734.07	5868.86	6453.66	13125	12266.7	18304.6	10125.5	5685.53	14565.4	2.56185	1.35718	1.18301e-07	5.64213e-06	chrX	9705586	9708507	plus
WBGene00001619	178	61	85	606	357	218	81.6377	67.7389	117.54	341.217	382.798	493.373	247.384	88.9724	405.796	4.56092	2.18933	1.18408e-07	5.64213e-06	chrX	6506847	6509845	plus
WBGene00016219	88	83	60	684	385	321	40.3602	92.1694	82.9698	385.136	412.822	726.481	289.99	71.8331	508.146	7.07398	2.82252	1.19278e-07	5.66852e-06	chrIII	120491	124685	plus
WBGene00010059	12860	5866	5123	26817	14231	9350	5898.09	6514.04	7084.23	15099.7	15259.4	21160.7	11836	6498.79	17173.3	2.64253	1.40192	1.19886e-07	5.68239e-06	chrX	14632023	14636352	minus
WBGene00001819	3236	1479	1154	6966	3525	2458	1484.15	1642.39	1595.78	3922.31	3779.73	5562.9	2997.88	1574.11	4421.65	2.80898	1.49005	1.21318e-07	5.72092e-06	chrI	6081800	6085964	plus
WBGene00018349	18502	10081	9051	43557	24151	17287	8485.73	11194.7	12516	24525.4	25896.2	39123.6	20290.3	10732.1	29848.4	2.78122	1.47572	1.21461e-07	5.72092e-06	chrIV	7314361	7317152	minus
WBGene00012844	18805	7990	6304	5324	2727	895	8624.7	8872.69	8717.36	2997.76	2924.06	2025.55	5693.69	8738.25	2649.12	0.303164	-1.72183	1.21654e-07	5.72092e-06	chrII	12120342	12120966	plus
WBGene00017156	1053	622	494	2391	1559	1101	482.947	690.715	683.118	1346.29	1671.66	2491.76	1227.75	618.926	1836.57	2.96735	1.56917	1.28489e-07	6.0194e-06	chrX	6967327	6983091	plus
WBGene00011222	513	287	275	1489	798	680	235.282	318.706	380.278	838.403	855.666	1538.96	694.55	311.422	1077.68	3.46051	1.79098	1.28671e-07	6.0194e-06	chrIV	10388472	10393273	plus
WBGene00044612	579	355	303	1608	901	796	265.552	394.218	418.997	905.408	966.11	1801.49	791.963	359.589	1224.34	3.40482	1.76758	1.30021e-07	6.06676e-06	chrV	7063679	7065304	minus
WBGene00008977	2119	899	674	4720	2282	1477	971.856	998.317	932.027	2657.67	2446.91	3342.72	1891.58	967.4	2815.76	2.91065	1.54134	1.32147e-07	6.14997e-06	chrX	14987299	14991310	minus
WBGene00001119	1277	577	524	2989	1645	992	585.682	640.744	724.603	1683	1763.87	2245.08	1273.83	650.343	1897.32	2.91741	1.54469	1.35436e-07	6.28674e-06	chrIV	3396578	3399120	minus
WBGene00009658	21032	6812	5050	5435	2733	1094	9646.09	7564.55	6983.29	3060.26	2930.5	2475.92	5443.43	8064.64	2822.22	0.34995	-1.51478	1.40188e-07	6.49057e-06	chrII	11814776	11816512	minus
WBGene00011315	188	138	108	699	526	332	86.2241	153.245	149.346	393.582	564.011	751.376	349.631	129.605	569.656	4.39533	2.13597	1.45126e-07	6.7019e-06	chrX	10719486	10721990	minus
WBGene00004219	32289	13377	12397	65724	33372	22265	14809	14854.8	17142.9	37006.9	35783.6	50389.7	28331.2	15602.2	41060.1	2.63168	1.39598	1.47265e-07	6.76591e-06	chrX	6060722	6065951	minus
WBGene00009830	2219	1341	1105	4904	3438	2807	1017.72	1489.15	1528.03	2761.27	3686.44	6352.75	2805.89	1344.96	4266.82	3.17244	1.66559	1.48744e-07	6.81643e-06	chrV	11313382	11316862	minus
WBGene00004890	3963	1922	1810	8882	4569	3109	1817.59	2134.33	2502.92	5001.14	4899.17	7036.23	3898.56	2151.61	5645.51	2.62385	1.39169	1.5082e-07	6.89395e-06	chrI	3667127	3671705	minus
WBGene00016133	11507	6244	5491	26028	13799	9569	5277.56	6933.8	7593.12	14655.4	14796.2	21656.4	11818.7	6601.49	17036	2.58063	1.36772	1.58708e-07	7.2361e-06	chrX	5338241	5340149	plus
WBGene00013610	4033	1391	1316	1013	288	156	1849.69	1544.67	1819.8	570.385	308.812	353.056	1074.4	1738.05	410.751	0.236328	-2.08114	1.59401e-07	7.24929e-06	chrV	16917172	16918454	minus
WBGene00016237	3505	1922	1791	10102	4318	3469	1607.53	2134.33	2476.65	5688.08	4630.03	7850.98	4064.6	2072.84	6056.36	2.92178	1.54685	1.63527e-07	7.39948e-06	chrII	6114392	6118237	minus
WBGene00001136	192	86	106	720	361	281	88.0586	95.5008	146.58	405.407	387.087	635.954	293.098	110.046	476.149	4.3268	2.1133	1.66745e-07	7.50727e-06	chrI	7308601	7311937	minus
WBGene00008515	627	459	351	2476	1496	1208	287.566	509.708	485.373	1394.15	1604.11	2733.92	1169.14	427.549	1910.73	4.46902	2.15996	1.68003e-07	7.54501e-06	chrX	13402024	13406347	plus
WBGene00006914	6339	3720	3636	23137	11884	9245	2907.31	4130.96	5027.97	13027.6	12742.8	20923.1	9793.29	4022.08	15564.5	3.86976	1.95225	1.69666e-07	7.60071e-06	chrIV	8303955	8307356	plus
WBGene00009226	54	66	54	880	457	344	24.7665	73.2913	74.6728	495.497	490.025	778.534	322.798	57.5769	588.019	10.2128	3.3523	1.71279e-07	7.65385e-06	chrV	16278171	16280594	plus
WBGene00012841	13573	4416	3829	3945	1554	588	6225.1	4903.86	5294.85	2221.29	1666.3	1330.75	3607.03	5474.6	1739.45	0.31773	-1.65413	1.72384e-07	7.67561e-06	chrII	12113160	12113784	minus
WBGene00001133	109	51	68	547	304	287	49.9916	56.6342	94.0324	307.996	325.968	649.533	247.359	66.8861	427.833	6.39644	2.67727	1.73044e-07	7.67561e-06	chrII	14166807	14171573	minus
WBGene00004507	1371	680	691	3036	2135	1491	628.794	755.123	955.535	1709.46	2289.28	3374.4	1618.77	779.817	2457.72	3.15166	1.65611	1.73047e-07	7.67561e-06	chrII	6702200	6705522	minus
WBGene00015376	147	93	89	414	355	318	67.4199	103.274	123.072	233.109	380.654	719.692	271.203	97.9219	444.485	4.53917	2.18243	1.73854e-07	7.69239e-06	chrX	6355549	6357745	plus
WBGene00020260	131	49	70	521	291	248	60.0817	54.4132	96.798	293.357	312.029	561.269	229.658	70.431	388.885	5.5215	2.46506	1.75308e-07	7.73767e-06	chrI	6192289	6194901	minus
WBGene00021008	767	413	338	1529	1194	862	351.776	458.626	467.396	860.926	1280.28	1950.86	894.978	425.933	1364.02	3.20244	1.67917	1.79702e-07	7.89284e-06	chrI	2216102	2219486	plus
WBGene00019166	1963	833	685	4148	2075	1608	900.308	925.025	947.238	2335.59	2224.95	3639.2	1828.72	924.19	2733.24	2.95745	1.56435	1.80615e-07	7.9136e-06	chrIV	4827864	4841119	minus
WBGene00018236	10010	3357	2414	2470	1384	472	4590.97	3727.86	3338.15	1390.77	1484.01	1068.22	2600	3885.66	1314.33	0.338252	-1.56383	1.82082e-07	7.95844e-06	chrX	3262922	3264149	plus
WBGene00009060	595	165	185	1051	872	567	272.89	183.228	255.823	591.781	935.014	1283.22	586.993	237.314	936.673	3.94698	1.98075	1.84186e-07	8.02383e-06	chrV	10459165	10463247	minus
WBGene00010227	7678	4540	4370	2239	1054	395	3521.43	5041.55	6042.96	1260.7	1130.17	893.957	2981.8	4868.65	1094.94	0.224896	-2.15267	1.84471e-07	8.02383e-06	chrIII	9599955	9600661	minus
WBGene00016328	340	226	159	1065	541	426	155.937	250.967	219.87	599.664	580.095	964.115	461.775	208.925	714.625	3.42049	1.7742	1.86611e-07	8.09728e-06	chrI	5196081	5199939	plus
WBGene00008167	1331	661	553	2156	1910	1408	610.448	734.024	764.705	1213.97	2048.02	3186.56	1426.29	703.059	2149.52	3.05738	1.6123	1.88552e-07	8.16181e-06	chrIII	9586529	9592110	minus
WBGene00016448	588	207	261	1463	695	712	269.68	229.868	360.918	823.764	745.223	1611.38	673.473	286.822	1060.12	3.6961	1.886	1.91723e-07	8.2791e-06	chrIII	4872531	4874715	minus
WBGene00050935	1277	367	251	181	87	51	585.682	407.544	347.09	101.915	93.2869	115.422	275.157	446.772	103.541	0.231754	-2.10933	1.98038e-07	8.51091e-06	chrV	18115374	18123566	plus
WBGene00006309	1416	744	514	3156	1747	1199	649.432	826.193	710.774	1777.03	1873.24	2713.55	1425.04	728.8	2121.28	2.91064	1.54134	2.00153e-07	8.58124e-06	chrV	8157726	8159854	plus
WBGene00020340	993	495	536	3119	1624	1186	455.428	549.685	741.196	1756.2	1741.36	2684.13	1321.33	582.103	2060.56	3.53986	1.82369	2.04678e-07	8.75435e-06	chrV	1982447	1987028	minus
WBGene00000401	8497	4644	3934	18096	10281	6839	3897.05	5157.04	5440.05	10189.2	11023.9	15477.9	8530.87	4831.38	12230.4	2.53144	1.33996	2.08124e-07	8.88061e-06	chrX	16595163	16601969	plus
WBGene00020897	761	382	404	1817	1449	1001	349.024	424.201	558.663	1023.09	1553.71	2265.44	1029.02	443.963	1614.08	3.63562	1.8622	2.08795e-07	8.88814e-06	chrII	6474371	6482011	minus
WBGene00017666	762	310	309	2061	790	639	349.483	344.247	427.294	1160.48	847.088	1446.17	762.46	373.675	1151.25	3.08088	1.62334	2.15733e-07	9.15829e-06	chrX	1328864	1329942	minus
WBGene00013230	12319	5690	4135	2958	2299	694	5649.97	6318.6	5718	1665.55	2465.13	1570.65	3897.98	5895.52	1900.44	0.322353	-1.63328	2.16161e-07	9.15829e-06	chrIII	11882484	11883439	minus
WBGene00021704	831	417	516	152	89	35	381.129	463.068	713.54	85.5858	95.4315	79.2113	302.994	519.246	86.7429	0.167056	-2.5816	2.17505e-07	9.19357e-06	chrIII	2112404	2116887	minus
WBGene00018217	3375	1517	1268	8325	3145	2170	1547.91	1684.59	1753.43	4687.51	3372.27	4911.1	2992.8	1661.97	4323.63	2.6015	1.37934	2.18128e-07	9.19822e-06	chrV	7878895	7881869	plus
WBGene00005655	2865	1144	1243	6892	2705	2002	1314	1270.38	1718.86	3880.64	2900.47	4530.89	2602.54	1434.41	3770.67	2.62872	1.39436	2.21214e-07	9.30655e-06	chrV	5019209	5022354	plus
WBGene00001187	16896	8789	7749	34898	19393	13677	7749.16	9759.96	10715.5	19649.8	20794.4	30953.5	16603.7	9408.22	23799.3	2.52962	1.33892	2.25686e-07	9.47248e-06	chrIV	7405449	7418723	plus
WBGene00001505	855	362	424	2090	1342	1077	392.136	401.992	586.32	1176.81	1438.98	2437.45	1072.28	460.149	1684.41	3.66057	1.87207	2.2655e-07	9.48656e-06	chrII	8756237	8758669	minus
WBGene00018216	1882	1113	891	4262	2537	1773	863.158	1235.96	1232.1	2399.78	2720.33	4012.62	2077.33	1110.41	3044.24	2.74156	1.455	2.28614e-07	9.54313e-06	chrV	7891511	7895561	plus
WBGene00044921	358	207	180	1077	586	406	164.193	229.868	248.909	606.421	628.347	918.852	466.098	214.323	717.873	3.34948	1.74394	2.28963e-07	9.54313e-06	chrV	13778001	13778578	plus
WBGene00017506	127	116	75	538	598	509	58.2471	128.815	103.712	302.929	641.214	1151.96	397.813	96.9248	698.701	7.20869	2.84974	2.32249e-07	9.63857e-06	chrV	1594112	1594665	plus
WBGene00043994	1014	527	449	2357	1334	945	465.06	585.22	620.89	1327.14	1430.4	2138.71	1094.57	557.057	1632.08	2.92983	1.55082	2.32326e-07	9.63857e-06	chrIII	9725201	9727455	minus
WBGene00044283	1032	358	305	2717	905	644	473.315	397.55	421.763	1529.85	970.399	1457.49	875.06	430.876	1319.24	3.06177	1.61437	2.40119e-07	9.93894e-06	chrX	7211664	7212500	plus
WBGene00014235	332	114	131	1107	384	286	152.268	126.594	181.151	623.313	411.749	647.27	357.057	153.338	560.777	3.65714	1.87072	2.41059e-07	9.95489e-06	chrI	13205653	13207826	plus
WBGene00001664	124	38	48	439	223	198	56.8712	42.198	66.3758	247.185	239.115	448.11	183.309	55.1483	311.47	5.64786	2.4977	2.42736e-07	1.00012e-05	chrV	8370994	8374007	plus
WBGene00011559	14249	5788	4274	4235	1899	671	6535.14	6427.43	5910.21	2384.58	2036.23	1518.59	4135.36	6290.93	1979.8	0.314707	-1.66792	2.52703e-07	1.03643e-05	chrIII	10355705	10357601	minus
WBGene00016973	349	151	110	962	491	343	160.065	167.682	152.111	541.668	526.481	776.271	387.38	159.953	614.807	3.84368	1.94249	2.56301e-07	1.04879e-05	chrII	6528583	6531578	minus
WBGene00009475	1053	496	474	2029	1354	1133	482.947	550.795	655.461	1142.46	1451.85	2564.18	1141.28	563.068	1719.5	3.0538	1.61061	2.63069e-07	1.07404e-05	chrI	9018718	9020295	plus
WBGene00006861	2222	1184	1049	4130	3180	2066	1019.1	1314.8	1450.59	2325.46	3409.8	4675.73	2365.91	1261.49	3470.33	2.75097	1.45994	2.71892e-07	1.10504e-05	chrX	5074365	5078039	minus
WBGene00019346	2612	909	747	5146	2500	1778	1197.96	1009.42	1032.97	2897.53	2680.66	4023.94	2140.41	1080.12	3200.71	2.96329	1.5672	2.74319e-07	1.11238e-05	chrX	4687737	4691288	minus
WBGene00009299	6058	3388	2526	1538	1059	461	2778.43	3762.29	3493.03	865.993	1135.53	1043.33	2179.77	3344.58	1014.95	0.303461	-1.72042	2.76463e-07	1.11752e-05	chrV	17313546	17315100	minus
WBGene00006747	2000	1095	1140	6568	3916	3119	917.277	1215.97	1576.43	3698.21	4198.98	7058.86	3110.95	1236.56	4985.35	4.03164	2.01137	2.8464e-07	1.141e-05	chrX	15121164	15147670	minus
WBGene00018436	29592	12986	9715	7380	5179	2038	13572	14420.6	13434.2	4155.42	5553.25	4612.36	9291.31	13808.9	4773.68	0.345695	-1.53243	2.8848e-07	1.15161e-05	chrII	1724661	1727112	plus
WBGene00007999	9385	4665	4094	18214	11107	7506	4304.32	5180.36	5661.3	10255.7	11909.6	16987.4	9049.79	5048.66	13050.9	2.58502	1.37018	2.90318e-07	1.15638e-05	chrII	14627553	14630047	plus
WBGene00016033	3810	2159	2160	13086	6559	4867	1747.41	2397.51	2986.91	7368.26	7032.98	11014.9	5424.66	2377.28	8472.05	3.56376	1.8334	2.92326e-07	1.1618e-05	chrX	8997424	8998854	plus
WBGene00010442	3096	1216	1083	6505	2887	2241	1419.95	1350.34	1497.6	3662.74	3095.63	5071.79	2683.01	1422.63	3943.38	2.7719	1.47087	3.14936e-07	1.24647e-05	chrIV	13256061	13259041	plus
WBGene00020903	211	84	105	706	324	271	96.7728	93.2799	145.197	397.524	347.413	613.322	282.251	111.75	452.753	4.05149	2.01845	3.15017e-07	1.24647e-05	chrI	3655556	3661048	minus
WBGene00009558	2799	1328	1184	5862	3347	2125	1283.73	1474.71	1637.27	3300.69	3588.87	4809.26	2682.42	1465.24	3899.6	2.66142	1.41219	3.16641e-07	1.24881e-05	chrI	14760637	14768969	minus
WBGene00013852	9451	3996	3537	18945	9345	6697	4334.59	4437.46	4891.07	10667.3	10020.3	15156.5	8251.2	4554.37	11948	2.62342	1.39145	3.19235e-07	1.25487e-05	chrII	14678393	14681077	plus
WBGene00016018	1351	719	635	2676	1904	1326	619.621	798.431	878.097	1506.76	2041.59	3000.98	1474.25	765.383	2183.11	2.85231	1.51213	3.25905e-07	1.27829e-05	chrII	61302	64311	plus
WBGene00016343	297	158	166	953	527	372	136.216	175.455	229.55	536.601	565.083	841.903	414.135	180.407	647.862	3.59112	1.84443	3.33914e-07	1.30685e-05	chrX	3041968	3045782	minus
WBGene00021054	5385	2509	1779	1212	919	370	2469.77	2786.18	2460.05	682.434	985.41	837.377	1703.54	2572	835.074	0.324679	-1.62292	3.36905e-07	1.31569e-05	chrII	4062360	4064060	minus
WBGene00018675	1250	553	449	2984	1409	870	573.298	614.092	620.89	1680.19	1510.82	1968.97	1161.38	602.76	1719.99	2.85352	1.51274	3.37664e-07	1.31579e-05	chrIII	5302179	5306285	plus
WBGene00017838	258	198	187	1807	655	551	118.329	219.874	258.589	1017.46	702.333	1247.01	593.933	198.931	988.934	4.97125	2.31361	3.47615e-07	1.35163e-05	chrII	4763190	4764174	plus
WBGene00009100	108	94	73	680	362	337	49.533	104.385	100.947	382.884	388.159	762.692	298.1	84.9547	511.245	6.01786	2.58925	3.49409e-07	1.35568e-05	chrV	9556692	9561595	minus
WBGene00019420	10006	4211	3180	2760	1576	476	4589.14	4676.21	4397.4	1554.06	1689.89	1077.27	2997.33	4554.25	1440.41	0.316278	-1.66074	3.5083e-07	1.35826e-05	chrII	1570089	1571141	minus
WBGene00044150	539	312	205	1012	882	650	247.206	346.468	283.48	569.821	945.737	1471.07	643.963	292.385	995.542	3.4049	1.76761	3.59684e-07	1.38954e-05	chrX	16013582	16016766	minus
WBGene00012099	444	260	244	1014	800	688	203.636	288.723	337.41	570.948	857.811	1557.07	635.933	276.59	995.276	3.59838	1.84735	3.64692e-07	1.40586e-05	chrIII	13480659	13484054	minus
WBGene00002173	3698	1820	1527	6907	4188	3315	1696.05	2021.06	2111.58	3889.09	4490.64	7502.45	3618.48	1942.9	5294.06	2.72483	1.44616	3.67001e-07	1.41174e-05	chrIV	7675163	7696912	plus
WBGene00019328	172	104	78	457	405	279	78.8859	115.489	107.861	257.321	434.267	631.428	270.875	100.745	441.005	4.37742	2.13008	3.78068e-07	1.45007e-05	chrIII	823215	826405	plus
WBGene00020654	366	192	142	833	598	457	167.862	213.211	196.362	469.033	641.214	1034.27	453.659	192.478	714.84	3.71388	1.89293	3.78582e-07	1.45007e-05	chrI	4409690	4419306	plus
WBGene00000953	2380	1230	1010	4101	3188	2210	1091.56	1365.88	1396.66	2309.13	3418.38	5001.63	2430.54	1284.7	3576.38	2.78382	1.47707	3.85489e-07	1.47026e-05	chrIV	9636963	9641986	minus
WBGene00012165	1138	344	349	2745	1052	669	521.931	382.003	482.607	1545.61	1128.02	1514.07	929.041	462.18	1395.9	3.02025	1.59467	3.94175e-07	1.5002e-05	chrI	7065262	7068128	plus
WBGene00017013	3210	1652	1538	6571	3966	2700	1472.23	1834.5	2126.79	3699.9	4252.6	6110.59	3249.44	1811.18	4687.69	2.58821	1.37195	4.06996e-07	1.54572e-05	chrX	8907997	8910782	plus
WBGene00044553	1586	781	676	3072	1946	1514	727.401	867.281	934.793	1729.73	2086.63	3426.46	1628.72	843.158	2414.27	2.86337	1.51771	4.14376e-07	1.57043e-05	chrV	8455375	8457585	plus
WBGene00006055	127	101	85	679	360	356	58.2471	112.158	117.54	382.321	386.015	805.692	310.329	95.9818	524.676	5.46641	2.45059	4.24718e-07	1.60624e-05	chrX	2823282	2826819	minus
WBGene00019727	3888	2085	1851	7892	4768	3335	1783.19	2315.34	2559.62	4443.71	5112.55	7547.71	3960.35	2219.38	5701.32	2.56888	1.36114	4.26325e-07	1.60893e-05	chrX	8763857	8766235	plus
WBGene00014814	5668	2454	1837	1244	950	426	2599.56	2725.1	2540.26	700.452	1018.65	964.115	1758.02	2621.64	894.406	0.341163	-1.55147	4.4607e-07	1.6764e-05	chrII	10935666	10942138	minus
WBGene00001544	1314	564	486	2932	1588	893	602.651	626.308	672.055	1650.91	1702.75	2021.02	1212.62	633.671	1791.56	2.82727	1.49941	4.50891e-07	1.69098e-05	chrII	3250989	3259358	minus
WBGene00013508	92047	50215	36887	24780	19478	6215	42216.3	55762.5	51008.4	13952.7	20885.6	14065.7	32981.9	49662.4	16301.3	0.328243	-1.60717	4.54469e-07	1.70085e-05	chrI	13978418	13980136	plus
WBGene00006809	727	414	338	1210	1147	874	333.43	459.736	467.396	681.308	1229.89	1978.02	858.296	420.188	1296.41	3.0853	1.62541	4.62641e-07	1.71712e-05	chrIV	6157299	6173029	minus
WBGene00007695	432	237	234	1036	725	595	198.132	263.182	323.582	583.335	777.391	1346.59	582.036	261.632	902.44	3.44927	1.78629	4.65129e-07	1.71925e-05	chrX	12222851	12226008	plus
WBGene00017437	2033	1038	1036	5190	2625	2017	932.413	1152.67	1432.61	2922.31	2814.69	4564.84	2303.26	1172.57	3433.94	2.92857	1.5502	4.75667e-07	1.75443e-05	chrII	6260959	6262495	plus
WBGene00003762	1079	405	352	1826	1173	1074	494.871	449.742	486.756	1028.16	1257.77	2430.66	1024.66	477.123	1572.19	3.29515	1.72034	4.77255e-07	1.75443e-05	chrV	11616265	11616869	plus
WBGene00011520	763	301	314	1880	891	600	349.941	334.253	434.208	1058.56	955.387	1357.91	748.377	372.801	1123.95	3.01489	1.5921	4.77576e-07	1.75443e-05	chrV	15894428	15896748	minus
WBGene00002977	7549	3926	3539	14837	8807	6327	3462.26	4359.72	4893.83	8354.19	9443.43	14319.1	7472.1	4238.61	10705.6	2.52573	1.3367	4.78977e-07	1.75599e-05	chrI	14390321	14400210	plus
WBGene00044743	1038	664	480	2249	1466	1301	476.067	737.355	663.758	1266.33	1571.94	2944.4	1276.64	625.727	1927.56	3.08051	1.62317	5.02109e-07	1.82959e-05	chrX	9210950	9212267	plus
WBGene00002048	7485	3922	3632	14254	9248	7219	3432.91	4355.28	5022.44	8025.92	9916.29	16337.9	7848.46	4270.21	11426.7	2.67591	1.42003	5.09752e-07	1.85368e-05	chrIII	5755493	5765769	plus
WBGene00019414	9988	4252	3126	2551	1715	589	4580.88	4721.74	4322.72	1436.38	1838.93	1333.01	3038.94	4541.78	1536.11	0.338217	-1.56398	5.26595e-07	1.91106e-05	chrII	1550719	1553309	plus
WBGene00018730	78	67	56	411	273	296	35.7738	74.4018	77.4384	231.42	292.728	669.902	230.277	62.538	398.016	6.36439	2.67002	5.39901e-07	1.95147e-05	chrX	8716482	8716947	minus
WBGene00002018	16361	2747	1652	2024	724	399	7503.79	3050.47	2284.43	1139.64	776.319	903.009	2609.61	4279.57	939.657	0.219568	-2.18726	5.46896e-07	1.97278e-05	chrV	1805232	1805874	plus
WBGene00017945	752	396	384	1565	1136	812	344.896	439.748	531.006	881.196	1218.09	1837.7	875.44	438.55	1312.33	2.99243	1.58132	5.54705e-07	1.99694e-05	chrII	4215608	4218242	plus
WBGene00018442	5434	3067	2245	1256	1133	419	2492.24	3405.83	3104.45	707.209	1214.87	948.273	1978.81	3000.84	956.786	0.318839	-1.6491	5.57316e-07	1.99833e-05	chrII	1704910	1706506	minus
WBGene00004401	338	158	198	1284	765	657	155.02	175.455	273.8	722.975	820.282	1486.91	605.74	201.425	1010.06	5.01455	2.32612	5.62168e-07	2.01171e-05	chrIII	9592198	9595490	minus
WBGene00006831	5908	3523	2898	12606	8727	6242	2709.64	3912.2	4007.44	7097.99	9357.65	14126.8	6868.62	3543.09	10194.1	2.87719	1.52466	5.70407e-07	2.03309e-05	chrII	6995009	7010579	plus
WBGene00012668	240	143	124	556	436	394	110.073	158.798	171.471	313.064	467.507	891.693	352.101	146.781	557.421	3.79765	1.92511	5.71795e-07	2.034e-05	chrV	19157630	19158791	minus
WBGene00077585	674	323	238	84	63	43	309.123	358.683	329.113	47.2974	67.5526	97.3168	201.514	332.306	70.7223	0.212823	-2.23228	5.86045e-07	2.08058e-05	chrV	15116251	15116578	plus
WBGene00000006	843	432	475	2918	1380	1179	386.632	479.725	656.844	1643.02	1479.72	2668.29	1219.04	507.734	1930.35	3.80189	1.92672	5.90353e-07	2.08762e-05	chrI	2571778	2576024	minus
WBGene00002974	1308	504	589	2842	1516	1181	599.899	559.679	814.486	1600.23	1625.55	2672.82	1312.11	658.022	1966.2	2.98805	1.5792	6.04456e-07	2.13329e-05	chrIV	13174147	13179359	minus
WBGene00009721	7154	3191	2237	1937	1136	403	3281.1	3543.52	3093.39	1090.66	1218.09	912.062	2189.8	3306	1073.6	0.324743	-1.62263	6.08874e-07	2.14467e-05	chrV	12527040	12528631	plus
WBGene00018992	929	471	438	1511	1380	1015	426.075	523.033	605.679	850.791	1479.72	2297.13	1030.41	518.263	1542.55	2.97638	1.57356	6.17461e-07	2.17066e-05	chrIII	2850988	2855411	minus
WBGene00044169	314	137	201	2013	626	543	144.013	152.135	277.949	1133.45	671.237	1228.91	601.282	191.365	1011.2	5.28412	2.40166	6.20315e-07	2.17643e-05	chrII	9375800	9377150	minus
WBGene00008542	2490	956	777	5291	2395	1501	1142.01	1061.61	1074.46	2979.18	2568.07	3397.03	2037.06	1092.69	2981.43	2.72851	1.44811	6.30932e-07	2.20921e-05	chrI	7354489	7357171	plus
WBGene00015035	299	162	167	969	453	372	137.133	179.897	230.932	545.61	485.735	841.903	403.535	182.654	624.416	3.41857	1.77339	6.33335e-07	2.20921e-05	chrIV	3572467	3577625	plus
WBGene00007675	6979	2553	2114	1732	993	488	3200.84	2835.04	2923.3	975.228	1064.76	1104.43	2017.27	2986.39	1048.14	0.350972	-1.51057	6.33346e-07	2.20921e-05	chrV	17535589	17538347	minus
WBGene00000673	172	97	78	838	218	163	78.8859	107.716	107.861	471.848	233.753	368.899	228.16	98.1542	358.167	3.64902	1.86751	6.3574e-07	2.21326e-05	chrIII	13018834	13020130	plus
WBGene00016453	106617	44686	30375	27366	20191	6578	48898.7	49622.7	42003.4	15408.8	21650.1	14887.2	32078.5	46841.6	17315.4	0.369658	-1.43574	6.41192e-07	2.22792e-05	chrI	10846767	10850094	plus
WBGene00017343	11930	5164	3175	2518	2276	757	5471.56	5734.49	4390.48	1417.8	2440.47	1713.23	3528.01	5198.84	1857.17	0.357227	-1.48509	6.43704e-07	2.23234e-05	chrII	7126715	7128973	plus
WBGene00017344	6871	3289	2921	1971	1043	521	3151.31	3652.35	4039.24	1109.8	1118.37	1179.12	2375.03	3614.3	1135.76	0.314241	-1.67005	6.51586e-07	2.25532e-05	chrII	7122200	7124359	plus
WBGene00002142	972	456	385	2197	1065	896	445.797	506.376	532.389	1237.05	1141.96	2027.81	981.898	494.854	1468.94	2.96843	1.5697	6.63895e-07	2.2935e-05	chrI	9876519	9879110	plus
WBGene00011928	91	53	68	504	436	362	41.7361	58.8551	94.0324	283.785	467.507	819.272	294.198	64.8746	523.521	8.06974	3.01252	6.70571e-07	2.30605e-05	chrII	8630733	8634264	minus
WBGene00015478	2843	1406	1012	6038	2849	2121	1303.91	1561.33	1399.42	3399.78	3054.88	4800.21	2586.59	1421.55	3751.62	2.6391	1.40005	6.70608e-07	2.30605e-05	chrIII	6067806	6072030	plus
WBGene00015112	99943	57840	42087	26091	22454	7497	45837.7	64229.8	58199.1	14690.9	24076.6	16967.1	37333.6	56088.9	18578.2	0.331228	-1.5941	6.74844e-07	2.30912e-05	chrII	2299845	2300887	minus
WBGene00022848	568	281	169	1327	681	550	260.507	312.043	233.698	747.187	730.212	1244.75	588.066	268.749	907.383	3.37631	1.75545	6.82356e-07	2.32777e-05	chrV	6602720	6605360	minus
WBGene00044500	2089	1248	1063	5382	2887	2204	958.096	1385.87	1469.95	3030.41	3095.63	4988.05	2488	1271.31	3704.7	2.91409	1.54304	6.82885e-07	2.32777e-05	chrIV	5667531	5669514	minus
WBGene00009157	740	292	176	2528	551	419	339.393	324.259	243.378	1423.43	590.817	948.273	644.924	302.343	987.506	3.26618	1.7076	6.8538e-07	2.3315e-05	chrI	9757870	9760809	minus
WBGene00008168	3428	1935	1520	5957	4427	3151	1572.21	2148.77	2101.9	3354.18	4746.91	7131.28	3509.21	1940.96	5077.46	2.61595	1.38734	6.86576e-07	2.3315e-05	chrIII	9580558	9582303	minus
WBGene00000522	109	68	37	430	181	215	49.9916	75.5123	51.1647	242.118	194.08	486.584	183.242	58.8895	307.594	5.22324	2.38494	6.89607e-07	2.33738e-05	chrX	11047349	11049166	plus
WBGene00009304	23074	8582	7610	43447	21878	13591	10582.6	9530.09	10523.3	24463.5	23459	30758.9	18219.6	10212	26227.1	2.56826	1.36079	7.0879e-07	2.38958e-05	chrI	14829656	14834828	minus
WBGene00013019	22693	6633	5427	5953	2132	806	10407.9	7365.78	7504.61	3351.92	2286.07	1824.12	5456.73	8426.09	2487.37	0.295199	-1.76024	7.08999e-07	2.38958e-05	chrI	13477247	13487393	minus
WBGene00017288	8213	2684	2001	2042	1154	495	3766.8	2980.51	2767.04	1149.78	1237.39	1120.27	2170.3	3171.45	1169.15	0.368648	-1.43969	7.10671e-07	2.39073e-05	chrII	5348079	5350529	minus
WBGene00021863	34506	15283	10810	9945	5503	2382	15825.8	16971.4	14948.4	5599.68	5900.67	5390.9	10772.8	15915.2	5630.41	0.353776	-1.49909	7.19852e-07	2.41709e-05	chrIII	2295333	2304909	minus
WBGene00017157	300	113	89	691	476	303	137.592	125.484	123.072	389.078	510.398	685.744	328.561	128.716	528.406	4.10522	2.03746	7.38161e-07	2.46933e-05	chrX	6996831	7005532	minus
WBGene00015947	207	110	107	946	277	169	94.9382	122.152	147.963	532.659	297.017	382.478	262.868	121.684	404.051	3.32049	1.73139	7.41821e-07	2.47237e-05	chrX	8069496	8070239	plus
WBGene00044701	71	78	63	658	556	477	32.5634	86.617	87.1182	370.497	596.179	1079.54	375.419	68.7662	682.071	9.91869	3.31015	7.56741e-07	2.51368e-05	chrX	2263168	2267464	minus
WBGene00020317	250	131	152	617	602	594	114.66	145.472	210.19	347.411	645.503	1344.33	467.928	156.774	779.081	4.96945	2.31309	7.57015e-07	2.51368e-05	chrIII	6909169	6912427	minus
WBGene00010101	9254	6219	4765	1840	1756	569	4244.24	6906.04	6589.18	1036.04	1882.9	1287.75	3657.69	5913.15	1402.23	0.237137	-2.07621	7.6485e-07	2.53034e-05	chrV	19288820	19289860	plus
WBGene00016303	16189	7473	6006	4757	2705	1054	7424.9	8298.58	8305.27	2678.5	2900.47	2385.39	5332.19	8009.58	2654.79	0.331451	-1.59313	7.67667e-07	2.53499e-05	chrII	946493	948188	minus
WBGene00018515	582	340	322	1555	1118	701	266.928	377.561	445.271	875.566	1198.79	1586.49	791.768	363.253	1220.28	3.35931	1.74817	7.77286e-07	2.56106e-05	chrX	5788088	5790314	plus
WBGene00018576	383	119	121	870	554	321	175.659	132.146	167.322	489.866	594.034	726.481	380.918	158.376	603.461	3.81031	1.92991	7.83216e-07	2.5635e-05	chrX	2385758	2392688	plus
WBGene00003977	162875	68025	49538	50505	26189	8642	74700.8	75540	68502.6	28437.6	28081.5	19558.4	49136.8	72914.5	25359.2	0.347793	-1.5237	7.88052e-07	2.57392e-05	chrI	11355228	11356362	plus
WBGene00001691	78	69	85	802	1102	1004	35.7738	76.6227	117.54	451.578	1181.63	2272.23	689.231	76.6457	1301.82	16.9849	4.08618	8.30797e-07	2.7037e-05	chrV	20609832	20613753	plus
WBGene00010158	167766	67411	50047	52532	26343	8720	76944	74858.2	69206.5	29578.9	28246.6	19734.9	49761.5	73669.5	25853.5	0.350939	-1.51071	8.62752e-07	2.80262e-05	chrI	11358159	11359293	minus
WBGene00015061	22244	11134	9262	36034	25636	18629	10202	12364	12807.8	20289.5	27488.6	42160.8	20885.4	11791.2	29979.6	2.54253	1.34627	8.71448e-07	2.82576e-05	chrII	7724850	7752673	plus
WBGene00016314	230	69	88	509	365	306	105.487	76.6227	121.689	286.6	391.376	692.533	279.051	101.266	456.837	4.51124	2.17353	8.89597e-07	2.87713e-05	chrII	6331870	6333955	minus
WBGene00003736	1430	847	1007	7743	4115	2974	655.853	940.572	1392.51	4359.81	4412.37	6730.7	3081.97	996.311	5167.63	5.18676	2.37483	8.90494e-07	2.87713e-05	chrIV	11930847	11935691	plus
WBGene00012201	1024	356	306	2152	1144	653	469.646	395.329	423.146	1211.72	1226.67	1477.86	867.394	429.374	1305.41	3.04028	1.6042	8.97991e-07	2.89614e-05	chrII	11448956	11451381	plus
WBGene00007746	903	508	567	3847	2027	1786	414.151	564.121	784.064	2166.11	2173.48	4042.04	1690.66	587.445	2793.88	4.75598	2.24974	9.03273e-07	2.90796e-05	chrII	8350485	8354652	minus
WBGene00009340	10193	3261	2602	24745	6863	4416	4674.9	3621.26	3598.12	13933	7358.95	9994.21	7196.75	3964.76	10428.7	2.63036	1.39526	9.13607e-07	2.93596e-05	chrV	10557951	10560769	plus
WBGene00021213	3415	1818	1653	7574	3826	2700	1566.25	2018.84	2285.82	4264.65	4102.48	6110.59	3391.44	1956.97	4825.91	2.46601	1.30218	9.2668e-07	2.97184e-05	chrI	748231	757013	minus
WBGene00018823	529	302	266	1225	790	598	242.62	335.363	367.833	689.754	847.088	1353.38	639.34	315.272	963.408	3.0558	1.61155	9.51401e-07	3.03726e-05	chrV	2810425	2811983	plus
WBGene00013518	4111	1654	1568	9497	3475	2390	1885.46	1836.72	2168.28	5347.43	3726.12	5409	3395.5	1963.49	4827.51	2.45864	1.29786	9.51891e-07	3.03726e-05	chrIV	15259881	15269013	plus
WBGene00002039	25455	12590	10425	47269	27941	18501	11674.6	13980.9	14416	26615.5	29960.1	41871.1	23086.4	13357.2	32815.6	2.45678	1.29677	9.55907e-07	3.04467e-05	chrX	2303074	2315390	plus
WBGene00006217	953	378	419	2203	1035	759	437.083	419.759	579.405	1240.43	1109.79	1717.75	917.371	478.749	1355.99	2.83237	1.50201	9.63813e-07	3.06441e-05	chrIV	4862177	4864133	plus
WBGene00019285	3491	2390	2139	13425	7767	5389	1601.11	2654.03	2957.87	7559.14	8328.27	12196.3	5882.79	2404.34	9361.23	3.89348	1.96106	9.74382e-07	3.09046e-05	chrII	328564	332515	minus
WBGene00008654	142	170	149	2319	601	485	65.1267	188.781	206.042	1305.75	644.43	1097.64	584.628	153.316	1015.94	6.62643	2.72823	9.75445e-07	3.09046e-05	chrIII	4618842	4643271	minus
WBGene00017912	12970	5307	3846	3553	2127	806	5948.54	5893.29	5318.36	2000.57	2280.7	1824.12	3877.6	5720.06	2035.13	0.355788	-1.49091	9.77764e-07	3.09235e-05	chrII	2758630	2761915	plus
WBGene00006985	4682	1846	1463	8225	4578	3317	2147.35	2049.94	2023.08	4631.21	4908.82	7506.97	3877.89	2073.45	5682.33	2.74052	1.45445	9.83717e-07	3.10571e-05	chrIII	13119719	13133829	plus
WBGene00012300	3788	3476	3192	1275	856	286	1737.32	3860.01	4413.99	717.907	917.858	647.27	2049.06	3337.11	761.012	0.228045	-2.13261	9.88672e-07	3.11042e-05	chrX	12296022	12296577	minus
WBGene00119203	267	105	105	703	390	301	122.457	116.6	145.197	395.834	418.183	681.218	313.248	128.084	498.412	3.89127	1.96024	1.03843e-06	3.25517e-05	chrIII	4709213	4712492	plus
WBGene00015843	1457	776	631	380	129	47	668.237	861.728	872.565	213.965	138.322	106.37	476.864	800.843	152.885	0.190905	-2.38907	1.04012e-06	3.25517e-05	chrII	3444731	3445367	minus
WBGene00014094	224	172	162	1278	748	623	102.735	191.002	224.018	719.597	802.053	1409.96	574.894	172.585	977.204	5.66216	2.50135	1.06057e-06	3.3134e-05	chrIV	11943302	11945698	minus
WBGene00018706	281	193	182	1352	618	393	128.877	214.322	251.675	761.263	662.659	889.43	484.704	198.291	771.118	3.88881	1.95933	1.11097e-06	3.44093e-05	chrV	1548143	1550701	plus
WBGene00001159	3541	1966	1736	7621	4539	2997	1624.04	2183.19	2400.59	4291.12	4867	6782.75	3691.45	2069.27	5313.62	2.56787	1.36057	1.11692e-06	3.44759e-05	chrII	8346640	8350499	plus
WBGene00006453	521	330	290	1085	1077	818	238.951	366.457	401.02	610.925	1154.83	1851.28	770.577	335.476	1205.68	3.59393	1.84556	1.11887e-06	3.44759e-05	chrIV	7590550	7605887	plus
WBGene00010109	152	135	114	946	633	566	69.7131	149.914	157.643	532.659	678.743	1280.96	478.272	125.757	830.788	6.60632	2.72385	1.15057e-06	3.53918e-05	chrV	11383087	11384268	plus
WBGene00016210	5277	2536	2525	11503	5588	4003	2420.24	2816.16	3491.64	6476.93	5991.81	9059.51	5042.72	2909.35	7176.09	2.46656	1.3025	1.16084e-06	3.55512e-05	chrII	6303481	6306254	plus
WBGene00004363	8817	4905	3978	17033	10090	7062	4043.82	5446.88	5500.89	9590.68	10819.1	15982.6	8564	4997.2	12130.8	2.42752	1.27948	1.16169e-06	3.55512e-05	chrIV	7818239	7821149	plus
WBGene00017193	1023	611	644	4182	2208	2018	469.187	678.5	890.542	2354.74	2367.56	4567.1	1887.94	679.41	3096.46	4.55758	2.18827	1.18122e-06	3.60824e-05	chrV	9226071	9227469	plus
WBGene00002052	1093	648	677	4320	2285	1807	501.292	719.587	936.175	2432.44	2450.12	4089.57	1854.86	719.018	2990.71	4.15944	2.05639	1.19203e-06	3.62942e-05	chrX	4912270	4915956	minus
WBGene00021870	3169	1938	1632	8543	4362	3252	1453.43	2152.1	2256.78	4810.26	4677.21	7359.86	3784.94	1954.1	5615.78	2.87384	1.52298	1.19609e-06	3.63562e-05	chrIV	2931407	2936829	plus
WBGene00011077	78	59	60	369	335	291	35.7738	65.518	82.9698	207.771	359.208	658.586	234.971	61.4205	408.522	6.65122	2.73362	1.20871e-06	3.66779e-05	chrX	9864011	9866500	plus
WBGene00003969	1278	623	586	2512	1550	1190	586.14	691.826	810.338	1414.42	1662.01	2693.19	1309.65	696.101	1923.2	2.76282	1.46614	1.22874e-06	3.71633e-05	chrIII	919517	926303	minus
WBGene00019797	7368	2667	2126	2126	1079	341	3379.25	2961.64	2939.89	1197.08	1156.97	771.745	2067.76	3093.59	1041.93	0.336803	-1.57002	1.22885e-06	3.71633e-05	chrII	3637814	3639287	minus
WBGene00019550	81	30	58	870	306	300	37.1497	33.3142	80.2041	489.866	328.113	678.954	274.6	50.2227	498.978	9.93531	3.31256	1.26171e-06	3.80931e-05	chrX	3282599	3285711	plus
WBGene00019313	35494	13451	10330	10805	5664	1872	16278.9	14937	14284.6	6083.91	6073.3	4236.68	10315.7	15166.8	5464.63	0.360301	-1.47273	1.26603e-06	3.81594e-05	chrII	1059667	1060810	minus
WBGene00014144	15804	6050	4717	4790	2333	903	7248.33	6718.37	6522.81	2697.08	2501.59	2043.65	4621.97	6829.83	2414.11	0.353465	-1.50036	1.27023e-06	3.82217e-05	chrX	9463297	9464666	plus
WBGene00003563	122	55	65	402	263	195	55.9539	61.0761	89.8839	226.352	282.005	441.32	192.765	68.9713	316.559	4.58972	2.19841	1.28388e-06	3.85637e-05	chrX	960562	963199	minus
WBGene00021304	236	169	152	858	604	560	108.239	187.67	210.19	483.109	647.647	1267.38	484.04	168.7	799.379	4.73848	2.24442	1.28589e-06	3.85637e-05	chrV	1895796	1906518	plus
WBGene00016217	211	182	131	1092	634	552	96.7728	202.106	181.151	614.867	679.815	1249.28	503.998	160.01	847.986	5.29958	2.40588	1.30142e-06	3.88627e-05	chrIII	130946	131973	plus
WBGene00001519	2218	1139	940	4948	2305	1643	1017.26	1264.83	1299.86	2786.04	2471.57	3718.41	2092.99	1193.98	2992.01	2.5059	1.32533	1.30196e-06	3.88627e-05	chrV	14564737	14579704	minus
WBGene00018133	1418	628	626	2537	1740	1280	650.35	697.378	865.651	1428.5	1865.74	2896.87	1400.75	737.793	2063.7	2.79713	1.48395	1.30774e-06	3.8959e-05	chrIII	6718641	6719689	plus
WBGene00020390	1984	1007	836	2935	2527	1904	909.939	1118.25	1156.05	1652.59	2709.61	4309.1	1975.92	1061.41	2890.43	2.7232	1.4453	1.3186e-06	3.91526e-05	chrV	1870600	1871788	minus
WBGene00002128	3805	2077	2039	10508	5372	4145	1745.12	2306.46	2819.59	5916.68	5760.2	9380.89	4654.82	2290.39	7019.26	3.06466	1.61573	1.32366e-06	3.92381e-05	chrIV	12746561	12749698	plus
WBGene00016190	121	119	89	610	646	570	55.4953	132.146	123.072	343.469	692.682	1290.01	439.48	103.571	775.388	7.48653	2.9043	1.34988e-06	3.99495e-05	chrX	8826654	8828479	minus
WBGene00008199	295	198	118	743	517	369	135.298	219.874	163.174	418.357	554.36	835.114	387.696	172.782	602.61	3.48769	1.80227	1.40048e-06	4.13418e-05	chrIV	17339619	17342277	minus
WBGene00021519	403	253	230	1170	790	549	184.831	280.95	318.051	658.786	847.088	1242.49	588.699	261.277	916.12	3.50631	1.80995	1.41129e-06	4.15613e-05	chrIV	1560229	1561810	plus
WBGene00016106	9038	3865	3816	17881	9173	5784	4145.18	4291.98	5276.88	10068.2	9835.88	13090.2	7784.72	4571.35	10998.1	2.40588	1.26656	1.41943e-06	4.16879e-05	chrX	5445037	5448037	plus
WBGene00003597	5423	2790	2428	10737	5959	4090	2487.2	3098.22	3357.51	6045.63	6389.62	9256.41	5105.76	2980.98	7230.55	2.42556	1.27832	1.42062e-06	4.16879e-05	chrIII	9147312	9153812	minus
WBGene00001059	447	360	291	2106	1355	972	205.012	399.771	402.403	1185.81	1452.92	2199.81	974.288	335.729	1612.85	4.80402	2.26424	1.42255e-06	4.16879e-05	chrIII	8038175	8041308	plus
WBGene00018282	1162	702	691	4353	1952	1754	532.938	779.553	955.535	2451.02	2093.06	3969.62	1796.95	756.009	2837.9	3.75379	1.90835	1.4414e-06	4.21029e-05	chrX	8382652	8384891	minus
WBGene00012532	3082	1570	1334	6090	3406	2433	1413.52	1743.44	1844.69	3429.06	3652.13	5506.32	2931.53	1667.22	4195.84	2.51667	1.33151	1.4508e-06	4.21718e-05	chrV	10478567	10480942	plus
WBGene00000633	192	132	123	619	522	420	88.0586	146.583	170.088	348.537	559.722	950.536	377.254	134.91	619.598	4.59269	2.19934	1.45757e-06	4.23001e-05	chrI	6232779	6234282	plus
WBGene00016468	303	143	145	657	573	349	138.968	158.798	200.51	369.933	614.407	789.85	378.744	166.092	591.397	3.56066	1.83215	1.46126e-06	4.23389e-05	chrX	7089185	7096406	minus
WBGene00022396	8817	5157	4520	21379	12327	8860	4043.82	5726.72	6250.39	12037.8	13217.8	20051.8	10221.4	5340.31	15102.4	2.82801	1.49979	1.47943e-06	4.27276e-05	chrV	8001431	8004700	plus
WBGene00012421	1871	860	806	4441	1802	1255	858.113	955.008	1114.56	2500.57	1932.22	2840.29	1700.13	975.894	2424.36	2.48425	1.31281	1.4921e-06	4.30242e-05	chrII	9139648	9145252	plus
WBGene00004816	89749	36367	24045	28416	14179	4869	41162.4	40384.6	33250.1	16000	15203.6	11019.4	26170	38265.7	14074.4	0.367806	-1.44298	1.5103e-06	4.34793e-05	chrIV	15946758	15947407	plus
WBGene00006600	430	129	115	1074	460	312	197.215	143.251	159.025	604.731	493.241	706.113	383.929	166.497	601.362	3.61185	1.85274	1.52469e-06	4.37517e-05	chrII	7549287	7551929	plus
WBGene00010248	2673	1142	927	678	390	153	1225.94	1268.16	1281.88	381.758	418.183	346.267	820.366	1258.66	382.069	0.303552	-1.71999	1.52707e-06	4.37517e-05	chrI	12045227	12046584	minus
WBGene00016346	3976	1169	1015	1024	523	164	1823.55	1298.14	1403.57	576.578	560.794	371.162	1005.63	1508.42	502.845	0.333358	-1.58485	1.55272e-06	4.436e-05	chrX	17302678	17303945	plus
WBGene00019703	41737	21886	18110	11440	9187	3374	19142.2	24303.8	25043	6441.46	9850.89	7635.97	15402.9	22829.7	7976.11	0.349374	-1.51716	1.55477e-06	4.436e-05	chrII	1041327	1042309	minus
WBGene00013962	20282	10126	8205	36471	22249	14645	9302.11	11244.7	11346.1	20535.5	23856.8	33144.3	18238.3	10631	25845.5	2.43116	1.28164	1.55571e-06	4.436e-05	chrV	9666676	9670186	plus
WBGene00004925	421	181	203	939	637	438	193.087	200.996	280.714	528.718	683.032	991.273	479.637	224.932	734.341	3.26472	1.70696	1.57069e-06	4.46479e-05	chrV	1393125	1411623	minus
WBGene00008570	168	112	125	985	564	530	77.0513	124.373	172.854	554.619	604.757	1199.49	455.523	124.759	786.287	6.30243	2.65591	1.57078e-06	4.46479e-05	chrI	8196053	8208734	plus
WBGene00044049	2908	1661	1402	4884	3819	2874	1333.72	1844.5	1938.73	2750.01	4094.98	6504.38	3077.72	1705.65	4449.79	2.60885	1.38342	1.58908e-06	4.50255e-05	chrII	8100498	8105000	minus
WBGene00020605	353	121	98	1142	336	211	161.899	134.367	135.517	643.02	360.281	477.531	318.769	143.928	493.611	3.42956	1.77803	1.60113e-06	4.52244e-05	chrIII	7391620	7395218	minus
WBGene00018885	149	125	87	652	415	352	68.3372	138.809	120.306	367.118	444.989	796.64	322.7	109.151	536.249	4.91292	2.29658	1.60689e-06	4.53158e-05	chrX	8344648	8346307	minus
WBGene00002054	11917	6989	5907	25857	16443	11454	5465.6	7761.11	8168.37	14559.2	17631.2	25922.5	13251.3	7131.69	19371	2.71618	1.44158	1.61619e-06	4.54675e-05	chrII	5750168	5754121	plus
WBGene00001452	435	265	206	1038	654	504	199.508	294.276	284.863	584.461	701.26	1140.64	534.169	259.549	808.788	3.11613	1.63976	1.61733e-06	4.54675e-05	chrIV	12754535	12757650	minus
WBGene00008270	569	312	297	1282	827	610	260.965	346.468	410.7	721.849	886.762	1380.54	667.881	339.378	996.384	2.93591	1.55381	1.62242e-06	4.55392e-05	chrV	14546906	14554525	plus
WBGene00008582	460	375	303	1264	1703	1436	210.974	416.428	418.997	711.714	1826.07	3249.93	1139.02	348.8	1929.24	5.53107	2.46756	1.64579e-06	4.60515e-05	chrIV	12412946	12417640	minus
WBGene00010066	8592	3184	2863	2699	1037	361	3940.62	3535.75	3959.04	1519.71	1111.94	817.008	2480.68	3811.8	1149.55	0.301577	-1.7294	1.65928e-06	4.62523e-05	chrX	11865474	11866993	plus
WBGene00009826	317	129	138	795	467	326	145.388	143.251	190.83	447.636	500.747	737.797	360.942	159.823	562.06	3.51676	1.81425	1.66069e-06	4.62523e-05	chrI	14060864	14062125	minus
WBGene00019204	770	325	288	1777	886	564	353.152	360.904	398.255	1000.57	950.026	1276.43	723.223	370.77	1075.68	2.90119	1.53665	1.67015e-06	4.64437e-05	chrV	8923878	8928916	minus
WBGene00022645	84	59	66	468	392	292	38.5257	65.518	91.2667	263.514	420.327	660.849	256.667	65.1035	448.23	6.88489	2.78343	1.68184e-06	4.66243e-05	chrV	415714	417707	minus
WBGene00138717	11598	6598	4967	3263	2334	1039	5319.29	7326.91	6868.51	1837.28	2502.66	2351.45	4367.68	6504.91	2230.46	0.342889	-1.54418	1.6862e-06	4.66732e-05	chrIV	1956725	1959725	plus
WBGene00010214	111	83	71	601	208	153	50.9089	92.1694	98.1809	338.402	223.031	346.267	191.493	80.4197	302.566	3.76234	1.91163	1.68929e-06	4.66869e-05	chrV	16339004	16341514	plus
WBGene00077592	110	69	76	429	331	298	50.4503	76.6227	105.095	241.555	354.919	674.428	250.512	77.3893	423.634	5.47406	2.45261	1.7077e-06	4.70508e-05	chrX	6176094	6177119	plus
WBGene00011684	318	99	95	750	383	319	145.847	109.937	131.369	422.299	410.677	721.955	323.681	129.051	518.31	4.01632	2.00587	1.72068e-06	4.72635e-05	chrX	15161213	15166147	minus
WBGene00006526	269	119	86	737	384	261	123.374	132.146	118.923	414.979	411.749	590.69	298.644	124.815	472.473	3.7854	1.92045	1.73143e-06	4.74861e-05	chrIII	9181472	9185571	plus
WBGene00000172	1234	800	748	4617	2350	1824	565.96	888.38	1034.36	2599.67	2519.82	4128.04	1956.04	829.565	3082.51	3.71581	1.89368	1.73522e-06	4.74949e-05	chrV	9737567	9744206	plus
WBGene00006767	2361	997	831	3890	2551	1932	1082.85	1107.14	1149.13	2190.32	2735.34	4372.47	2106.21	1113.04	3099.38	2.78461	1.47747	1.73704e-06	4.74949e-05	chrIV	12773838	12787489	plus
WBGene00013415	1510	684	540	3396	1473	1015	692.545	759.565	746.728	1912.17	1579.44	2297.13	1331.26	732.946	1929.58	2.63264	1.39651	1.75963e-06	4.80394e-05	chrIV	14276440	14285499	plus
WBGene00002053	26342	14666	12431	51604	31372	20166	12081.5	16286.2	17189.9	29056.4	33639.1	45639.3	25648.7	15185.9	36111.6	2.37797	1.24973	1.76496e-06	4.8112e-05	chrII	5765598	5772118	plus
WBGene00008987	4392	2184	1881	9362	4216	3139	2014.34	2425.28	2601.1	5271.41	4520.66	7104.13	3989.49	2346.91	5632.07	2.39978	1.2629	1.77707e-06	4.83576e-05	chrV	13765771	13768495	minus
WBGene00020579	463	373	347	2233	2138	1549	212.35	414.207	479.842	1257.32	2292.5	3505.67	1360.31	368.799	2351.83	6.37699	2.67288	1.77936e-06	4.83576e-05	chrII	6631121	6637066	plus
WBGene00010385	536	318	317	1720	1056	758	245.83	353.131	438.357	968.471	1132.31	1715.49	808.932	345.773	1272.09	3.67898	1.87931	1.79153e-06	4.8615e-05	chrV	14901552	14909109	minus
WBGene00011335	672	375	405	2477	1256	1034	308.205	416.428	560.046	1394.71	1346.76	2340.13	1061.05	428.226	1693.87	3.95554	1.98388	1.80098e-06	4.87976e-05	chrII	10231249	10235954	plus
WBGene00004808	34677	28418	26280	12842	6770	2654	15904.2	31557.5	36340.8	7230.88	7259.23	6006.48	17383.2	27934.1	6832.19	0.244582	-2.03161	1.82088e-06	4.92626e-05	chrI	9469696	9470629	plus
WBGene00022283	16354	5237	4840	31180	12901	8422	7500.58	5815.55	6692.89	17556.4	13833.3	19060.5	11743.2	6669.68	16816.7	2.52137	1.33421	1.84208e-06	4.97387e-05	chrII	4649091	4653273	plus
WBGene00020543	13849	5870	4181	2846	2760	1061	6351.69	6518.48	5781.61	1602.48	2959.45	2401.24	4269.16	6217.26	2321.06	0.373324	-1.4215	1.88903e-06	5.08762e-05	chrIII	143630	144791	minus
WBGene00001621	361	236	211	1177	687	506	165.569	262.072	291.777	662.727	736.645	1145.17	543.993	239.806	848.181	3.53695	1.8225	1.93192e-06	5.19535e-05	chrIV	10130344	10133255	plus
WBGene00022824	502	231	192	1191	638	442	230.237	256.52	265.503	670.61	684.104	1000.33	517.883	250.753	785.013	3.13062	1.64645	1.97222e-06	5.2958e-05	chrX	3448731	3451209	minus
WBGene00018438	68054	25987	18726	22020	10840	3351	31212.2	28857.9	25894.9	12398.7	11623.3	7583.92	19595.2	28655	10535.3	0.367661	-1.44355	1.98326e-06	5.31751e-05	chrII	1715168	1716503	plus
WBGene00011075	1029	590	389	1768	1407	999	471.939	655.18	537.921	995.498	1508.68	2260.92	1071.69	555.013	1588.36	2.86185	1.51695	2.0105e-06	5.38251e-05	chrX	10751580	10757630	minus
WBGene00044737	257	189	133	1052	350	351	117.87	209.88	183.916	592.344	375.292	794.377	378.947	170.555	587.338	3.44368	1.78395	2.01514e-06	5.38689e-05	chrIV	13254201	13255311	plus
WBGene00003892	1998	763	679	3803	1955	1370	916.36	847.292	938.941	2141.33	2096.28	3100.56	1673.46	900.864	2446.06	2.71523	1.44108	2.01963e-06	5.39089e-05	chrIII	12190955	12202349	minus
WBGene00016059	3594	1579	1184	6357	3803	2429	1648.35	1753.44	1637.27	3579.4	4077.82	5497.27	3032.26	1679.69	4384.83	2.61051	1.38433	2.06068e-06	5.48412e-05	chrV	5523711	5530714	plus
WBGene00189995	6683	2729	2166	13352	5824	3837	3065.08	3030.48	2995.21	7518.04	6244.86	8683.83	5256.25	3030.26	7482.24	2.46918	1.30403	2.06372e-06	5.48412e-05	chrIV	5865847	5867361	minus
WBGene00003672	185	69	23	708	659	453	84.8482	76.6227	31.8051	398.65	706.622	1025.22	387.295	64.4253	710.164	11.0231	3.46245	2.07859e-06	5.51548e-05	chrI	12245447	12246742	plus
WBGene00020766	121	67	74	362	218	252	55.4953	74.4018	102.329	203.829	233.753	570.322	206.688	77.4088	335.968	4.34018	2.11775	2.09676e-06	5.5555e-05	chrX	2204043	2205056	minus
WBGene00086562	3700	1412	1062	725	679	223	1696.96	1567.99	1468.56	408.222	728.067	504.689	1062.42	1577.84	546.993	0.346672	-1.52836	2.11486e-06	5.5952e-05	chrI	11820679	11823450	plus
WBGene00011078	113	52	55	309	211	227	51.8262	57.7447	76.0556	173.987	226.248	513.742	183.267	61.8755	304.659	4.92374	2.29976	2.11899e-06	5.59786e-05	chrX	9866602	9867863	plus
WBGene00006655	1973	953	819	4048	2023	1547	904.894	1058.28	1132.54	2279.29	2169.19	3501.14	1840.89	1031.9	2649.87	2.56794	1.36061	2.15243e-06	5.67427e-05	chrII	8154044	8156885	minus
WBGene00000510	1378	635	609	2985	1609	963	632.004	705.151	842.143	1680.75	1725.27	2179.44	1294.13	726.433	1861.82	2.56296	1.35781	2.15432e-06	5.67427e-05	chrX	4286713	4291466	plus
WBGene00020571	2805	1362	1416	6386	3457	2788	1286.48	1512.47	1958.09	3595.73	3706.82	6309.75	3061.55	1585.68	4537.43	2.86151	1.51678	2.15771e-06	5.67427e-05	chrX	656187	658513	plus
WBGene00014021	2601	798	753	5495	2061	1279	1192.92	886.159	1041.27	3094.04	2209.94	2894.61	1886.49	1040.12	2732.86	2.62746	1.39367	2.16159e-06	5.67427e-05	chrIII	8882888	8885404	minus
WBGene00006690	607	401	278	1402	956	676	278.394	445.3	384.427	789.417	1025.08	1529.91	742.089	369.373	1114.8	3.01809	1.59364	2.16511e-06	5.67427e-05	chrIII	11795696	11803140	plus
WBGene00000727	297	168	176	673	701	503	136.216	186.56	243.378	378.943	751.657	1138.38	472.522	188.718	756.326	4.00771	2.00278	2.16686e-06	5.67427e-05	chrV	11385342	11386363	plus
WBGene00003983	35125	15736	11416	11292	6154	1975	16109.7	17474.4	15786.4	6358.13	6598.71	4469.78	11132.9	16456.8	5808.87	0.352976	-1.50236	2.17005e-06	5.67436e-05	chrII	12846134	12847767	minus
WBGene00008784	51831	28891	19093	15765	10957	3639	23771.7	32082.7	26402.4	8876.71	11748.8	8235.72	18519.7	27418.9	9620.41	0.350867	-1.511	2.21095e-06	5.77288e-05	chrI	12230407	12232299	plus
WBGene00022296	27307	12086	9223	7307	5169	2295	12524	13421.2	12753.8	4114.31	5542.53	5194	8924.99	12899.7	4950.28	0.383752	-1.38175	2.23256e-06	5.82086e-05	chrIV	1993089	2008292	plus
WBGene00004998	2549	1586	1320	6669	3570	2829	1169.07	1761.21	1825.33	3755.08	3827.98	6402.54	3123.54	1585.21	4661.87	2.94086	1.55624	2.25544e-06	5.872e-05	chrX	8417366	8418398	minus
WBGene00012289	2030	1234	1124	4436	3972	2806	931.037	1370.33	1554.3	2497.75	4259.03	6350.49	2827.16	1285.22	4369.09	3.39949	1.76532	2.26338e-06	5.88414e-05	chrI	13418447	13423368	plus
WBGene00016485	8591	4247	3822	2523	1548	740	3940.17	4716.18	5285.17	1420.61	1659.86	1674.75	3116.13	4647.17	1585.08	0.341084	-1.5518	2.27756e-06	5.91244e-05	chrX	1682947	1686378	plus
WBGene00017337	1653	805	429	148	220	64	758.13	893.932	593.234	83.3336	235.898	144.844	451.562	748.432	154.692	0.206688	-2.27447	2.28597e-06	5.91718e-05	chrV	7148669	7150631	minus
WBGene00018073	8473	4995	4909	26263	14877	12343	3886.05	5546.82	6788.31	14787.8	15952.1	27934.4	12482.6	5407.06	19558.1	3.61714	1.85485	2.30244e-06	5.94268e-05	chrIV	8307311	8312933	minus
WBGene00011676	874	475	327	2535	881	482	400.85	527.475	452.185	1427.37	944.664	1090.85	807.233	460.17	1154.3	2.50841	1.32677	2.31996e-06	5.97931e-05	chrII	9783759	9787339	minus
WBGene00008093	3790	1395	1347	7856	3316	2095	1738.24	1549.11	1862.67	4423.44	3555.63	4741.36	2978.41	1716.67	4240.14	2.46997	1.3045	2.32553e-06	5.98509e-05	chrX	14572649	14576037	plus
WBGene00004316	456	376	305	2076	1452	1239	209.139	417.538	421.763	1168.92	1556.93	2804.08	1096.4	349.48	1843.31	5.27443	2.39902	2.36586e-06	6.08015e-05	chrIII	6675748	6703943	plus
WBGene00007949	930	463	324	1888	1086	774	426.534	514.15	448.037	1063.07	1164.48	1751.7	894.661	462.907	1326.42	2.86541	1.51874	2.41616e-06	6.18289e-05	chrV	10505827	10507920	plus
WBGene00000441	1074	443	414	1592	1288	1035	492.578	491.94	572.491	896.399	1381.08	2342.39	1029.48	519.003	1539.96	2.96714	1.56907	2.44091e-06	6.21965e-05	chrX	3843354	3857778	minus
WBGene00000679	286	179	165	794	512	432	131.171	198.775	228.167	447.073	548.999	977.694	421.98	186.037	657.922	3.5365	1.82232	2.4626e-06	6.26471e-05	chrIV	1357815	1359224	minus
WBGene00007174	2232	1392	1270	6277	4011	3247	1023.68	1545.78	1756.19	3534.36	4300.85	7348.55	3251.57	1441.89	5061.25	3.51016	1.81154	2.46557e-06	6.26471e-05	chrX	16030734	16034744	plus
WBGene00018690	4616	1503	1050	1072	711	281	2117.08	1669.04	1451.97	603.605	762.379	635.954	1206.67	1746.03	667.313	0.382189	-1.38764	2.49072e-06	6.31077e-05	chrX	1983708	1984827	plus
WBGene00010440	337	98	103	951	282	319	154.561	108.826	142.431	535.475	302.378	721.955	327.604	135.273	519.936	3.8436	1.94246	2.53239e-06	6.4073e-05	chrIV	13250653	13252289	minus
WBGene00010275	145	102	120	1157	563	515	66.5026	113.268	165.94	651.466	603.684	1165.54	461.067	115.237	806.896	7.00207	2.80778	2.54005e-06	6.41764e-05	chrIV	9658036	9663924	plus
WBGene00000692	719	512	462	3053	1634	1376	329.761	568.563	638.867	1719.04	1752.08	3114.14	1353.74	512.397	2195.08	4.28395	2.09894	2.54601e-06	6.42366e-05	chrIV	8848169	8849663	plus
WBGene00015921	101	61	42	324	224	190	46.3225	67.7389	58.0788	182.433	240.187	430.004	170.794	57.3801	284.208	4.95308	2.30833	2.5954e-06	6.5391e-05	chrX	8173860	8180852	plus
WBGene00008462	424	254	159	903	585	503	194.463	282.061	219.87	508.447	627.274	1138.38	495.082	232.131	758.034	3.26554	1.70732	2.63031e-06	6.61777e-05	chrX	14257900	14262366	plus
WBGene00009842	176	152	99	811	516	341	80.7204	168.792	136.9	456.645	553.288	771.745	361.348	128.804	593.893	4.61082	2.20502	2.67752e-06	6.72101e-05	chrX	11444289	11446555	minus
WBGene00022419	1161	569	572	2357	1515	939	532.48	631.86	790.978	1327.14	1624.48	2125.13	1172.01	651.773	1692.25	2.59638	1.3765	2.67949e-06	6.72101e-05	chrX	2014136	2018078	plus
WBGene00016415	10290	4521	4225	18812	10481	6814	4719.39	5020.45	5842.45	10592.4	11238.4	15421.3	8805.73	5194.1	12417.4	2.39067	1.25741	2.7134e-06	6.7888e-05	chrII	5203303	5209786	plus
WBGene00001984	1647	559	477	3316	1413	1000	755.378	620.755	659.61	1867.12	1515.11	2263.18	1280.19	678.581	1881.8	2.77315	1.47152	2.7199e-06	6.79558e-05	chrX	5851999	5854219	minus
WBGene00000403	21547	11384	10100	44814	21266	14910	9882.29	12641.6	13966.6	25233.2	22802.8	33744	19711.7	12163.5	27260	2.24113	1.16423	2.72413e-06	6.79671e-05	chrII	5945381	5956660	minus
WBGene00015620	5449	2519	2042	10157	5264	3821	2499.12	2797.29	2823.74	5719.05	5644.4	8647.61	4688.53	2706.71	6670.35	2.46437	1.30122	2.74363e-06	6.83586e-05	chrIV	7664166	7672961	minus
WBGene00044404	671	231	212	1365	674	578	307.747	256.52	293.16	768.583	722.706	1308.12	609.472	285.809	933.136	3.2649	1.70704	2.88405e-06	7.13407e-05	chrI	9251843	9254352	minus
WBGene00016005	1037	652	402	2355	1326	986	475.608	724.029	555.897	1326.02	1421.82	2231.5	1122.48	585.178	1659.78	2.83636	1.50404	2.88715e-06	7.13407e-05	chrII	6679511	6682937	plus
WBGene00000370	2309	868	778	4132	2259	1573	1059	963.892	1075.84	2326.58	2422.24	3559.98	1901.26	1032.91	2769.6	2.68136	1.42297	2.92284e-06	7.21235e-05	chrIV	15270126	15275775	minus
WBGene00019128	594	307	334	1883	906	632	272.431	340.916	461.865	1060.25	971.471	1430.33	756.211	358.404	1154.02	3.21988	1.68701	2.9439e-06	7.25434e-05	chrII	5896147	5904570	plus
WBGene00019536	1479	663	500	3510	1256	906	678.327	736.245	691.415	1976.36	1346.76	2050.44	1246.59	701.995	1791.19	2.55157	1.35138	2.96739e-06	7.30223e-05	chrIV	1711278	1714178	plus
WBGene00017798	686	355	281	1533	808	631	314.626	394.218	388.575	863.178	866.389	1428.07	709.176	365.807	1052.54	2.87733	1.52473	3.02276e-06	7.42829e-05	chrV	8539704	8545544	minus
WBGene00017351	132	51	71	374	281	209	60.5403	56.6342	98.1809	210.586	301.306	473.005	200.042	71.7851	328.299	4.57336	2.19325	3.03836e-06	7.45644e-05	chrII	7113669	7115832	minus
WBGene00007769	1974	1158	853	548	347	124	905.353	1285.93	1179.55	308.559	372.076	280.634	722.018	1123.61	320.423	0.285172	-1.81009	3.07106e-06	7.52641e-05	chrI	11421924	11423591	plus
WBGene00017620	7592	3306	2934	2600	1140	413	3481.99	3671.23	4057.22	1463.97	1222.38	934.694	2471.91	3736.81	1207.01	0.323006	-1.63037	3.09465e-06	7.57387e-05	chrV	7049416	7051273	minus
WBGene00020331	399	176	171	615	551	513	182.997	195.444	236.464	346.285	590.817	1161.01	452.17	204.968	699.371	3.4121	1.77066	3.12301e-06	7.63288e-05	chrX	6281881	6286136	minus
WBGene00011836	916	487	521	2589	1668	1166	420.113	540.801	720.454	1457.77	1788.54	2638.87	1261.09	560.456	1961.73	3.50023	1.80745	3.13108e-06	7.64222e-05	chrV	11248128	11250848	plus
WBGene00000225	10196	5312	4885	20687	10966	7354	4676.28	5898.84	6755.12	11648.1	11758.4	16643.4	9563.37	5776.75	13350	2.31099	1.20851	3.17548e-06	7.74008e-05	chrII	14640021	14644010	minus
WBGene00008782	29408	14643	10866	9104	5858	2045	13487.6	16260.7	15025.8	5126.14	6281.32	4628.21	10135	14924.7	5345.22	0.358146	-1.48138	3.21651e-06	7.81885e-05	chrI	12216240	12217757	minus
WBGene00020438	7633	4516	3594	2543	1326	640	3500.79	5014.9	4969.89	1431.87	1421.82	1448.44	2964.62	4495.19	1434.04	0.319017	-1.64829	3.22755e-06	7.83509e-05	chrIII	6240754	6241529	plus
WBGene00011090	392	180	204	854	653	421	179.786	199.885	282.097	480.857	700.188	952.799	465.936	220.59	711.282	3.22446	1.68906	3.25493e-06	7.88025e-05	chrV	12072858	12074969	minus
WBGene00011182	3788	2308	2001	8854	6120	4236	1737.32	2562.98	2767.04	4985.37	6562.25	9586.84	4700.3	2355.78	7044.82	2.99044	1.58036	3.2854e-06	7.94333e-05	chrIV	10621696	10628821	minus
WBGene00004223	404	168	104	1046	467	282	185.29	186.56	143.814	588.966	500.747	638.217	373.932	171.888	575.977	3.35088	1.74454	3.29533e-06	7.95662e-05	chrIII	9157165	9161575	minus
WBGene00016337	9418	3798	2694	2498	1802	579	4319.46	4217.58	3725.34	1406.54	1932.22	1310.38	2818.59	4087.46	1549.71	0.379138	-1.3992	3.37533e-06	8.12795e-05	chrII	2167393	2168764	minus
WBGene00022010	974	587	602	2902	2093	1885	446.714	651.848	832.463	1634.01	2244.25	4266.1	1679.23	643.675	2714.79	4.21763	2.07643	3.39619e-06	8.16723e-05	chrIV	8585529	8594603	plus
WBGene00012904	16877	8159	6048	5200	3216	1170	7740.45	9060.36	8363.35	2927.94	3448.4	2647.92	5698.07	8388.05	3008.09	0.358616	-1.47949	3.45162e-06	8.2778e-05	chrII	12768673	12773775	plus
WBGene00019765	113	62	53	324	209	222	51.8262	68.8494	73.2899	182.433	224.103	502.426	183.821	64.6552	302.987	4.6862	2.22842	3.45599e-06	8.2778e-05	chrV	5953814	5954823	minus
WBGene00007420	685	184	203	1845	479	396	314.168	204.327	280.714	1038.85	513.614	896.22	541.316	266.403	816.229	3.06389	1.61536	3.48681e-06	8.3405e-05	chrII	10346337	10346948	plus
WBGene00007339	731	505	468	3144	1347	1058	335.265	560.79	647.164	1770.28	1444.34	2394.45	1192.05	514.406	1869.69	3.63465	1.86182	3.51516e-06	8.39086e-05	chrII	11411818	11415708	minus
WBGene00016705	3773	1535	1129	875	626	309	1730.44	1704.58	1561.21	492.682	671.237	699.323	1143.25	1665.41	621.081	0.372929	-1.42303	3.52188e-06	8.39086e-05	chrX	4632333	4635757	plus
WBGene00013699	41262	20025	11371	11159	9020	2841	18924.4	22237.3	15724.2	6283.24	9671.82	6429.7	13211.8	18961.9	7461.58	0.393504	-1.34555	3.53306e-06	8.40635e-05	chrI	10110844	10111840	plus
WBGene00012041	10919	4160	2869	2947	1979	676	5007.88	4619.57	3967.34	1659.35	2122.01	1529.91	3151.01	4531.6	1770.42	0.390684	-1.35592	3.55967e-06	8.45845e-05	chrI	12657720	12659370	minus
WBGene00013895	798	324	376	1016	1120	873	365.994	359.794	519.944	572.074	1200.94	1975.76	832.416	415.244	1249.59	3.00929	1.58942	3.59098e-06	8.52159e-05	chrI	10356242	10360881	plus
WBGene00001413	11333	4615	4414	3280	2017	887	5197.75	5124.84	6103.81	1846.85	2162.76	2007.44	3740.58	5475.47	2005.68	0.366304	-1.44889	3.61963e-06	8.57825e-05	chrIV	9104951	9107594	plus
WBGene00000535	285	62	51	966	451	549	130.712	68.8494	70.5243	543.92	483.591	1242.49	423.347	90.0286	756.666	8.40473	3.0712	3.63425e-06	8.60153e-05	chrIV	6092587	6093636	minus
WBGene00004347	374	199	198	963	565	370	171.531	220.984	273.8	542.231	605.829	837.377	441.959	222.105	661.812	2.97973	1.57518	3.66603e-06	8.66533e-05	chrII	12668772	12671556	plus
WBGene00000059	243	121	82	688	418	192	111.449	134.367	113.392	387.389	448.206	434.531	271.556	119.736	423.375	3.5359	1.82208	3.70315e-06	8.74157e-05	chrII	14373755	14377814	minus
WBGene00004281	2228	793	696	4411	1916	1299	1021.85	880.606	962.449	2483.68	2054.46	2939.87	1723.82	954.967	2492.67	2.61021	1.38417	3.749e-06	8.82393e-05	chrIV	9242209	9243983	minus
WBGene00017842	1687	945	950	4729	2773	2010	773.724	1049.4	1313.69	2662.73	2973.39	4548.99	2220.32	1045.6	3395.04	3.24697	1.69909	3.75276e-06	8.82393e-05	chrII	4775291	4781343	minus
WBGene00011762	1178	767	562	1809	1983	1467	540.276	851.734	777.15	1018.58	2126.3	3320.09	1439.02	723.053	2154.99	2.9804	1.57551	3.75277e-06	8.82393e-05	chrIV	9964246	9966609	plus
WBGene00021985	19827	8149	6310	6220	3345	1297	9093.43	9049.26	8725.65	3502.26	3586.72	2935.35	6148.78	8956.11	3341.44	0.373091	-1.4224	3.80127e-06	8.92628e-05	chrII	2199148	2204144	minus
WBGene00019370	207	72	67	541	293	224	94.9382	79.9542	92.6496	304.618	314.173	506.953	232.214	89.1806	375.248	4.20773	2.07304	3.82322e-06	8.95029e-05	chrIV	1527220	1536397	minus
WBGene00000144	2751	2188	1859	970	483	181	1261.72	2429.72	2570.68	546.173	517.903	409.636	1289.3	2087.37	491.237	0.235338	-2.08719	3.82644e-06	8.95029e-05	chrV	10425339	10426363	minus
WBGene00003093	218	91	87	633	320	220	99.9832	101.053	120.306	356.42	343.124	497.9	253.131	107.114	399.148	3.72638	1.89777	3.85809e-06	9.01258e-05	chrIV	11621420	11623101	minus
WBGene00017568	1235	644	645	2757	1647	1324	566.419	715.146	891.925	1552.37	1766.02	2996.45	1414.72	724.496	2104.95	2.90539	1.53873	3.89734e-06	9.08392e-05	chrX	8599888	8602220	plus
WBGene00011314	1310	426	458	2773	1186	771	600.817	473.062	633.336	1561.38	1271.7	1744.91	1047.54	569.072	1526	2.68156	1.42307	3.90051e-06	9.08392e-05	chrII	8725483	8729727	minus
WBGene00004856	285	119	113	675	368	341	130.712	132.146	156.26	380.069	394.593	771.745	327.587	139.706	515.469	3.68967	1.88349	3.9038e-06	9.08392e-05	chrIII	8749691	8756988	plus
WBGene00008512	987	621	638	4085	2054	1733	452.676	689.605	882.245	2300.12	2202.43	3922.09	1741.53	674.842	2808.21	4.16129	2.05703	3.93568e-06	9.12951e-05	chrIV	10246140	10249885	plus
WBGene00004910	5370	2480	2685	11667	6925	5053	2462.89	2753.98	3712.9	6569.28	7425.43	11435.9	5726.72	2976.59	8476.85	2.84784	1.50987	3.93952e-06	9.12951e-05	chrV	11305052	11308428	minus
WBGene00019034	4906	1762	1242	1255	806	286	2250.08	1956.66	1717.47	706.646	864.245	647.27	1357.06	1974.74	739.387	0.374423	-1.41726	3.94342e-06	9.12951e-05	chrII	1684054	1685001	plus
WBGene00000368	6442	3331	3000	11562	7149	4972	2954.55	3698.99	4148.49	6510.15	7665.61	11252.5	6038.39	3600.68	8476.1	2.35403	1.23513	3.94617e-06	9.12951e-05	chrI	3641656	3647012	minus
WBGene00002393	4250	1969	1615	7430	4311	3146	1949.21	2186.52	2233.27	4183.57	4622.53	7119.97	3715.85	2123	5308.69	2.50056	1.32225	3.9488e-06	9.12951e-05	chrI	557434	561674	plus
WBGene00011794	4273	1635	1318	8026	3727	2445	1959.76	1815.63	1822.57	4519.16	3996.33	5533.48	3274.49	1865.99	4682.99	2.50966	1.32749	3.96744e-06	9.16082e-05	chrV	14215343	14220715	minus
WBGene00008993	258	114	75	652	356	258	118.329	126.594	103.712	367.118	381.726	583.901	280.23	116.212	444.248	3.82275	1.93461	4.07348e-06	9.36952e-05	chrV	15517693	15519663	plus
WBGene00010104	5774	2193	1557	1666	934	289	2648.18	2435.27	2153.07	938.066	1001.49	654.059	1638.36	2412.17	864.54	0.358407	-1.48033	4.08376e-06	9.38115e-05	chrV	19297781	19298720	plus
WBGene00009537	10203	4920	4001	3656	1582	641	4679.49	5463.53	5532.7	2058.56	1696.32	1450.7	3480.22	5225.24	1735.19	0.332079	-1.5904	4.14444e-06	9.50839e-05	chrIV	16278181	16278986	plus
WBGene00001569	34290	15472	13410	11159	5980	2700	15726.7	17181.3	18543.7	6283.24	6412.14	6110.59	11709.6	17150.6	6268.65	0.365507	-1.45203	4.18065e-06	9.57924e-05	chrX	1986197	1989599	minus
WBGene00019108	1163	746	580	3324	1548	888	533.397	828.414	802.041	1871.63	1659.86	2009.7	1284.17	721.284	1847.07	2.5608	1.3566	4.19405e-06	9.5977e-05	chrV	3037933	3039331	minus
WBGene00006637	3303	1220	1074	6439	2669	1987	1514.88	1354.78	1485.16	3625.57	2861.87	4496.94	2556.53	1451.61	3661.46	2.52235	1.33477	4.20326e-06	9.59778e-05	chrX	9163107	9165912	plus
WBGene00016626	1057	559	475	2237	1211	898	484.781	620.755	656.844	1259.58	1298.51	2032.34	1058.8	587.46	1530.14	2.60467	1.3811	4.20477e-06	9.59778e-05	chrII	6868898	6870796	minus
WBGene00016308	11502	3667	2711	2898	2163	636	5275.26	4072.11	3748.85	1631.76	2319.31	1439.38	3081.11	4365.41	1796.82	0.411603	-1.28067	4.21536e-06	9.60666e-05	chrII	970652	972957	minus
WBGene00020231	129	88	86	577	282	210	59.1644	97.7218	118.923	324.888	302.378	475.268	229.724	91.9365	367.512	3.99745	1.99908	4.21936e-06	9.60666e-05	chrII	2731153	2735255	minus
WBGene00021439	262	156	172	1067	587	532	120.163	173.234	237.847	600.79	629.419	1204.01	494.244	177.081	811.407	4.58212	2.19601	4.24964e-06	9.66335e-05	chrIII	2009289	2021579	minus
WBGene00012554	10345	6031	5579	26990	14538	11516	4744.62	6697.27	7714.8	15197.1	15588.6	26062.8	12667.5	6385.56	18949.5	2.96755	1.56927	4.27798e-06	9.7155e-05	chrIII	12915064	12918574	minus
WBGene00001184	5766	3082	2651	9022	6879	4789	2644.51	3422.48	3665.88	5079.97	7376.1	10838.4	5504.55	3244.29	7764.82	2.39338	1.25905	4.29057e-06	9.73179e-05	chrX	11016344	11023342	plus
WBGene00006670	256	117	62	486	397	309	117.412	129.926	85.7354	273.649	425.689	699.323	288.622	111.024	466.22	4.19927	2.07014	4.31313e-06	9.75311e-05	chrX	3081123	3085326	plus
WBGene00005003	450	167	180	1040	524	390	206.387	185.449	248.909	585.587	561.866	882.641	445.14	213.582	676.698	3.16833	1.66372	4.32e-06	9.75311e-05	chrIV	9593676	9594408	plus
WBGene00009862	7874	2554	1996	2195	1304	399	3611.32	2836.15	2760.13	1235.93	1398.23	903.009	2124.13	3069.2	1179.06	0.384157	-1.38023	4.32168e-06	9.75311e-05	chrI	14297277	14298314	plus
WBGene00016108	183	101	93	480	368	241	83.9309	112.158	128.603	270.271	394.593	545.427	255.83	108.231	403.43	3.7275	1.89821	4.34412e-06	9.79143e-05	chrX	1233088	1238898	minus
WBGene00019239	9708	3213	2294	2482	1720	607	4452.46	3567.95	3172.21	1397.53	1844.29	1373.75	2634.7	3730.88	1538.52	0.412376	-1.27797	4.38814e-06	9.87826e-05	chrV	919718	925946	plus
WBGene00017320	120	83	71	426	258	196	55.0366	92.1694	98.1809	239.866	276.644	443.583	200.913	81.7956	320.031	3.91257	1.96812	4.40822e-06	9.90678e-05	chrIII	8254904	8257548	plus
WBGene00016953	103	102	101	996	556	178	47.2398	113.268	139.666	560.812	596.179	402.846	310.002	100.058	519.946	5.19644	2.37752	4.41399e-06	9.90678e-05	chrIV	5685282	5688293	plus
WBGene00009088	6264	3456	2985	1981	1310	444	2872.91	3837.8	4127.75	1115.43	1404.67	1004.85	2393.9	3612.82	1174.98	0.325226	-1.62049	4.42256e-06	9.90678e-05	chrX	14444932	14446054	plus
WBGene00010918	3183	1428	1296	6570	2994	2007	1459.85	1585.76	1792.15	3699.33	3210.36	4542.2	2714.94	1612.58	3817.3	2.36719	1.24318	4.42287e-06	9.90678e-05	chrIV	11814222	11819438	plus
WBGene00000397	15285	8506	7769	34181	19512	13206	7010.29	9445.7	10743.2	19246.1	20922	29887.6	16209.1	9066.4	23351.9	2.57565	1.36494	4.46865e-06	9.99686e-05	chrIV	8669129	8677961	plus
WBGene00010642	2849	1226	868	4712	2847	2041	1306.66	1361.44	1200.3	2653.16	3052.73	4619.15	2365.57	1289.47	3441.68	2.66908	1.41634	4.48405e-06	0.00010017	chrI	7161014	7166516	plus
WBGene00017549	3171	2905	2851	1098	837	328	1454.34	3225.93	3942.45	618.245	897.485	742.323	1813.46	2874.24	752.684	0.261873	-1.93306	4.49613e-06	0.000100209	chrII	7689624	7690505	minus
WBGene00013273	1060	491	438	2368	1117	749	486.157	545.243	605.679	1333.34	1197.72	1695.12	977.21	545.693	1408.73	2.58154	1.36823	4.54751e-06	0.000101229	chrII	12358628	12366959	minus
WBGene00000211	20575	7656	5361	6217	3632	1128	9436.49	8501.79	7413.35	3500.57	3894.46	2552.87	5883.26	8450.54	3315.97	0.392397	-1.34961	4.5854e-06	0.000101946	chrII	6910028	6912653	plus
WBGene00004127	2763	1203	1363	3877	4110	3200	1267.22	1335.9	1884.8	2183	4407	7242.18	3053.35	1495.97	4610.73	3.0821	1.62391	4.61569e-06	0.000102265	chrX	450446	457649	minus
WBGene00016533	265	120	134	697	354	329	121.539	133.257	185.299	392.456	379.581	744.587	326.12	146.698	505.541	3.44613	1.78498	4.61684e-06	0.000102265	chrX	7896171	7897700	minus
WBGene00019518	328	239	206	1187	779	602	150.434	265.403	284.863	668.358	835.293	1362.44	594.464	233.567	955.362	4.09032	2.03221	4.63535e-06	0.000102548	chrX	16558371	16562236	plus
WBGene00020665	33435	17117	11741	10222	6923	2505	15334.6	19008	16235.8	5755.65	7423.28	5669.27	11571.1	16859.5	6282.73	0.372653	-1.42409	4.66486e-06	0.000103075	chrX	3926061	3929472	plus
WBGene00007802	183	131	97	579	378	218	83.9309	145.472	134.134	326.014	405.316	493.373	264.707	121.179	408.235	3.36885	1.75226	4.68433e-06	0.00010332	chrIV	11878526	11883384	plus
WBGene00002986	7069	2922	2129	2178	1056	483	3242.12	3244.81	2944.04	1226.35	1132.31	1093.12	2147.12	3143.66	1150.59	0.366005	-1.45006	4.69106e-06	0.00010332	chrIII	7521397	7524770	plus
WBGene00008727	285	211	195	1106	860	672	130.712	234.31	269.652	622.75	922.147	1520.86	616.738	211.558	1021.92	4.83044	2.27215	4.69322e-06	0.00010332	chrV	16396339	16398513	plus
WBGene00016817	508	288	236	1071	781	491	232.988	319.817	326.348	603.042	837.438	1111.22	571.809	293.051	850.567	2.90246	1.53727	4.73234e-06	0.000104032	chrV	7588520	7590501	minus
WBGene00008829	1921	605	450	390	288	79	881.045	671.837	622.273	219.595	308.812	178.791	480.392	725.052	235.733	0.325126	-1.62093	4.73714e-06	0.000104032	chrV	16069218	16071239	plus
WBGene00003956	1880	903	1009	4047	3255	2358	862.241	1002.76	1395.27	2278.72	3490.22	5336.58	2394.3	1086.76	3701.84	3.40632	1.76821	4.77299e-06	0.000104667	chrIII	7758665	7761208	plus
WBGene00017252	13638	4157	2992	3392	1915	631	6254.92	4616.24	4137.43	1909.92	2053.39	1428.07	3399.99	5002.86	1797.12	0.359219	-1.47706	4.77773e-06	0.000104667	chrII	2771087	2772271	minus
WBGene00008547	7220	4004	3463	14108	8285	5530	3311.37	4446.34	4788.74	7943.72	8883.7	12515.4	6981.54	4182.15	9780.94	2.33873	1.22573	4.81344e-06	0.000105193	chrII	11603890	11611466	plus
WBGene00018174	158	215	209	2476	739	482	72.4649	238.752	289.011	1394.15	792.403	1090.85	646.272	200.076	1092.47	5.46026	2.44897	4.82374e-06	0.00010529	chrX	6674839	6679813	plus
WBGene00007883	905	653	546	2910	1776	1795	415.068	725.14	755.025	1638.52	1904.34	4062.41	1583.42	631.744	2535.09	4.01284	2.00462	4.83431e-06	0.000105393	chrIV	9510038	9510577	minus
WBGene00009142	592	195	204	1310	582	449	271.514	216.543	282.097	737.615	624.057	1016.17	524.666	256.718	792.614	3.08749	1.62643	4.84187e-06	0.000105405	chrI	7656903	7658289	minus
WBGene00018266	417	257	258	1602	696	611	191.252	285.392	356.77	902.03	746.296	1382.8	644.091	277.805	1010.38	3.637	1.86275	4.84663e-06	0.000105405	chrV	2262487	2264540	minus
WBGene00020484	508	224	247	1182	606	481	232.988	248.746	341.559	665.542	649.792	1088.59	537.87	274.431	801.308	2.91989	1.54591	4.91604e-06	0.000106786	chrX	6179206	6180105	plus
WBGene00013458	9857	5638	4733	21290	10807	7443	4520.8	6260.85	6544.93	11987.6	11588	16844.9	9624.51	5775.53	13473.5	2.33286	1.2221	4.9241e-06	0.000106831	chrIV	14394109	14400334	plus
WBGene00008375	228	149	166	2031	372	297	104.57	165.461	229.55	1143.58	398.882	672.165	452.369	166.527	738.21	4.43299	2.14828	5.06931e-06	0.000109849	chrV	10784253	10785349	plus
WBGene00001104	73634	35534	28837	23667	14917	5377	33771.4	39459.6	39876.6	13326.1	15995	12169.1	25766.3	37702.6	13830	0.36682	-1.44686	5.12801e-06	0.000110987	chrIV	1202647	1204970	minus
WBGene00015913	1487	486	630	3671	1416	1144	681.996	539.691	871.182	2067.01	1518.33	2589.08	1377.88	697.623	2058.14	2.95022	1.56082	5.18288e-06	0.00011204	chrII	3245091	3246019	minus
WBGene00044197	12658	5760	4481	3290	2695	1089	5805.45	6396.33	6196.46	1852.48	2889.75	2464.6	4267.51	6132.75	2402.28	0.391713	-1.35213	5.32186e-06	0.000114444	chrV	19302701	19303699	minus
WBGene00044387	892	432	507	3045	1323	875	409.106	479.725	701.094	1714.53	1418.6	1980.28	1117.22	529.975	1704.47	3.21614	1.68533	5.32402e-06	0.000114444	chrII	5067057	5067987	minus
WBGene00020490	2606	1099	1041	4000	3051	1958	1195.21	1220.41	1439.53	2252.26	3271.48	4431.31	2301.7	1285.05	3318.35	2.58227	1.36864	5.32593e-06	0.000114444	chrX	1163150	1177171	plus
WBGene00012387	563	308	263	1107	741	611	258.214	342.026	363.684	623.313	794.547	1382.8	627.431	321.308	933.555	2.90548	1.53878	5.35541e-06	0.000114846	chrI	13695685	13702942	minus
WBGene00021966	14290	10968	7479	3898	3477	1331	6553.95	12179.7	10342.2	2194.83	3728.26	3012.29	6335.2	9691.94	2978.46	0.307313	-1.70222	5.35782e-06	0.000114846	chrII	1296085	1296753	plus
WBGene00012811	275	182	165	924	559	318	126.126	202.106	228.167	520.272	599.395	719.692	399.293	185.466	613.12	3.30583	1.72501	5.37006e-06	0.000114846	chrV	19384858	19390091	minus
WBGene00017253	26352	9435	7323	7937	4744	1535	12086	10477.3	10126.5	4469.04	5086.82	3473.98	7619.95	10896.6	4343.28	0.39859	-1.32702	5.39649e-06	0.00011527	chrII	2772394	2773622	minus
WBGene00004221	1914	802	698	3211	2020	1465	877.835	890.601	965.215	1808	2165.97	3315.56	1670.53	911.217	2429.84	2.66659	1.415	5.41894e-06	0.000115535	chrII	5242452	5246824	minus
WBGene00016273	921	620	512	2219	1914	1273	422.406	688.494	708.009	1249.44	2052.31	2881.03	1333.62	606.303	2060.93	3.39917	1.76518	5.42172e-06	0.000115535	chrII	7299530	7301599	plus
WBGene00011723	674	452	383	1743	1287	1016	309.123	501.934	529.624	981.422	1380	2299.39	1000.25	446.894	1553.61	3.47646	1.79762	5.4387e-06	0.000115759	chrIV	11756355	11761041	minus
WBGene00000518	1516	906	735	2888	1975	1425	695.296	1006.09	1016.38	1626.13	2117.72	3225.03	1614.44	905.922	2322.96	2.5642	1.35851	5.49507e-06	0.000116821	chrIII	5635437	5654514	plus
WBGene00007368	1292	495	577	2032	1606	1114	592.561	549.685	797.892	1144.15	1722.06	2521.18	1221.25	646.713	1795.8	2.77681	1.47343	5.61223e-06	0.00011903	chrV	15476046	15478548	minus
WBGene00013899	2958	1122	948	4363	3313	1952	1356.65	1245.95	1310.92	2456.65	3552.41	4417.73	2390.05	1304.51	3475.6	2.66429	1.41375	5.65086e-06	0.000119708	chrV	12816904	12819528	minus
WBGene00020590	1963	945	783	3919	1981	1380	900.308	1049.4	1082.76	2206.65	2124.15	3123.19	1747.74	1010.82	2484.66	2.45807	1.29752	5.70621e-06	0.000120738	chrV	4874909	4879305	minus
WBGene00010575	177	94	94	618	251	214	81.1791	104.385	129.986	347.974	269.138	484.321	236.164	105.183	367.144	3.49052	1.80344	5.73081e-06	0.000121056	chrIII	9361443	9365275	plus
WBGene00021586	276	206	169	576	616	654	126.584	228.758	233.698	324.325	660.514	1480.12	509	196.347	821.653	4.18471	2.06513	5.73474e-06	0.000121056	chrIV	3960728	3964651	plus
WBGene00044630	4469	1836	1535	7885	4084	2892	2049.66	2038.83	2122.64	4439.77	4379.12	6545.12	3595.86	2070.38	5121.34	2.47363	1.30663	5.75273e-06	0.000121293	chrX	15757800	15766272	minus
WBGene00013794	10158	5144	4505	3236	2025	801	4658.85	5712.28	6229.65	1822.08	2171.33	1812.81	3734.5	5533.59	1935.41	0.349756	-1.51558	5.83341e-06	0.00012285	chrIV	17024283	17025094	minus
WBGene00001690	711	575	524	3077	2732	2155	326.092	638.523	724.603	1732.55	2929.42	4877.16	1871.39	563.072	3179.71	5.64707	2.4975	5.85603e-06	0.000123182	chrX	11109384	11115775	plus
WBGene00044227	85	83	56	530	270	217	38.9843	92.1694	77.4384	298.424	289.511	491.11	214.606	69.5307	359.682	5.17299	2.371	5.95211e-06	0.000124765	chrIII	9679614	9681185	minus
WBGene00010974	2154	861	681	4336	1889	1232	987.908	956.118	941.707	2441.45	2025.51	2788.24	1690.15	961.911	2418.4	2.51416	1.33008	5.97197e-06	0.000125036	chrIII	10258781	10261567	minus
WBGene00020196	1246	767	665	2806	1987	1444	571.464	851.734	919.581	1579.96	2130.59	3268.03	1553.56	780.926	2326.19	2.97876	1.57471	5.99825e-06	0.000125294	chrX	5174338	5177475	plus
WBGene00009546	20888	8809	6019	4423	4386	1384	9580.05	9782.17	8323.25	2490.44	4702.95	3132.24	6335.18	9228.49	3441.88	0.372962	-1.4229	6.03474e-06	0.000125909	chrIV	11838957	11840400	plus
WBGene00013319	9411	5950	5495	2856	1991	742	4316.25	6607.32	7598.65	1608.11	2134.88	1679.28	3990.75	6174.07	1807.42	0.292744	-1.77229	6.04893e-06	0.000126059	chrIV	14919592	14920391	plus
WBGene00010099	2262	895	801	615	360	100	1037.44	993.875	1107.65	346.285	386.015	226.318	682.93	1046.32	319.539	0.305393	-1.71126	6.05799e-06	0.000126102	chrV	19282585	19284565	plus
WBGene00011432	53000	22363	15748	14104	11651	3636	24307.9	24833.5	21776.8	7941.46	12492.9	8228.93	16596.9	23639.4	9554.45	0.404175	-1.30695	6.06501e-06	0.000126102	chrI	13306194	13308775	plus
WBGene00019870	145	87	68	427	282	210	66.5026	96.6113	94.0324	240.429	302.378	475.268	212.537	85.7154	339.358	3.95913	1.98518	6.10539e-06	0.000126648	chrX	8796492	8798159	minus
WBGene00003143	10241	4548	3736	19906	8820	5999	4696.92	5050.44	5166.25	11208.4	9457.37	13576.8	8192.69	4971.2	11414.2	2.29606	1.19916	6.13906e-06	0.00012706	chrV	13098895	13110322	minus
WBGene00000631	97	45	69	336	443	403	44.488	49.9713	95.4152	189.19	475.013	912.062	294.357	63.2915	525.422	8.30161	3.05339	6.13939e-06	0.00012706	chrI	5842717	5844060	plus
WBGene00000082	4061	1428	1474	6700	3744	2724	1862.53	1585.76	2038.29	3772.53	4014.56	6164.91	3239.76	1828.86	4650.66	2.54293	1.34649	6.17072e-06	0.000127561	chrX	12678760	12689207	plus
WBGene00011587	1589	635	590	2969	1589	1096	728.777	705.151	815.869	1671.74	1703.83	2480.45	1350.97	749.932	1952	2.60291	1.38012	6.24976e-06	0.000129047	chrV	12859364	12863816	plus
WBGene00019174	243	88	53	502	375	230	111.449	97.7218	73.2899	282.658	402.099	520.532	247.958	94.1536	401.763	4.2671	2.09326	6.28114e-06	0.000129486	chrIII	3226343	3230643	plus
WBGene00050875	124	115	61	1069	183	276	56.8712	127.705	84.3526	601.916	196.224	624.638	281.951	89.6428	474.259	5.29055	2.40342	6.30211e-06	0.000129681	chrI	11465132	11467599	plus
WBGene00006476	25100	13075	11728	47402	25423	17356	11511.8	14519.5	16217.8	26690.4	27260.2	39279.8	22579.9	14083	31076.8	2.20668	1.14188	6.36592e-06	0.000130844	chrII	4120340	4127852	plus
WBGene00006752	2271	1414	1630	10253	7468	6077	1041.57	1570.21	2254.01	5773.1	8007.67	13753.4	5399.99	1621.93	9178.04	5.65871	2.50047	6.38845e-06	0.000131157	chrI	7422781	7454098	plus
WBGene00016506	247	140	95	867	284	207	113.284	155.466	131.369	488.177	304.523	468.478	276.883	133.373	420.393	3.15201	1.65627	6.41561e-06	0.000131564	chrV	4847726	4849818	plus
WBGene00007615	10342	3287	2395	3206	1386	542	4743.24	3650.13	3311.88	1805.19	1486.16	1226.64	2703.87	3901.75	1506	0.38598	-1.3734	6.43872e-06	0.000131887	chrV	14417940	14420066	plus
WBGene00013715	155	39	88	986	502	388	71.089	43.3085	121.689	555.182	538.276	878.114	367.943	78.6955	657.191	8.35106	3.06196	6.45338e-06	0.000131942	chrI	10319660	10321484	minus
WBGene00010972	816	508	534	3570	1449	931	374.249	564.121	738.431	2010.14	1553.71	2107.02	1224.61	558.934	1890.29	3.38196	1.75786	6.45606e-06	0.000131942	chrIII	10254761	10257136	plus
WBGene00011393	11494	6197	5511	20965	12939	8969	5271.59	6881.61	7620.77	11804.7	13874	20298.5	10958.5	6591.33	15325.7	2.32513	1.21731	6.55996e-06	0.000133761	chrV	20816540	20820130	minus
WBGene00017467	290	142	118	639	436	332	133.005	157.687	163.174	359.798	467.507	751.376	338.758	151.289	526.227	3.4783	1.79838	6.63326e-06	0.000134923	chrV	5132726	5137085	plus
WBGene00012701	14545	7060	5068	4067	3170	1159	6670.9	7839.95	7008.18	2289.98	3399.08	2623.03	4971.85	7173.01	2770.7	0.386267	-1.37233	6.6395e-06	0.000134923	chrV	18960938	18967794	minus
WBGene00015645	763	411	375	1343	949	809	349.941	456.405	518.561	756.196	1017.58	1830.91	821.599	441.636	1201.56	2.72071	1.44398	6.65203e-06	0.000135025	chrII	553094	554785	plus
WBGene00007206	560	392	315	1618	1098	770	256.838	435.306	435.591	911.039	1177.35	1742.65	826.461	375.912	1277.01	3.3971	1.76431	6.67652e-06	0.000135216	chrIV	13129628	13133206	plus
WBGene00002024	1055	734	638	3384	2216	1734	483.864	815.088	882.245	1905.41	2376.14	3924.36	1731.18	727.066	2735.3	3.76211	1.91154	6.75246e-06	0.0001366	chrX	6233113	6235505	minus
WBGene00012096	3849	1474	1165	951	703	255	1765.3	1636.84	1611	535.475	753.801	577.111	1146.59	1671.05	622.129	0.372299	-1.42547	6.84614e-06	0.00013805	chrIII	13475305	13476006	minus
WBGene00020367	2359	999	949	4892	2173	1418	1081.93	1109.36	1312.3	2754.51	2330.03	3209.19	1966.22	1167.87	2764.58	2.3672	1.24318	6.9648e-06	0.000140264	chrII	4109210	4112822	plus
WBGene00017014	388	237	180	1022	490	397	177.952	263.182	248.909	575.452	525.409	898.483	448.231	230.015	666.448	2.89742	1.53477	7.10163e-06	0.00014254	chrX	8939335	8940089	minus
WBGene00004854	14932	6462	5687	26906	13908	8918	6848.39	7175.89	7864.15	15149.8	14913	20183	12022.4	7296.14	16748.6	2.29555	1.19884	7.16385e-06	0.000143629	chrX	14674250	14683257	plus
WBGene00022696	1545	759	672	2735	1859	1213	708.597	842.85	929.261	1539.98	1993.34	2745.24	1459.88	826.903	2092.85	2.53095	1.33968	7.21627e-06	0.000144471	chrIII	6032647	6039425	minus
WBGene00016266	455	166	138	828	498	462	208.681	184.339	190.83	466.218	533.987	1045.59	438.274	194.617	681.932	3.50397	1.80899	7.22194e-06	0.000144471	chrI	6974557	6977072	plus
WBGene00008194	1581	1002	1059	6115	4050	3211	725.108	1112.7	1464.42	3443.14	4342.67	7267.07	3059.18	1100.74	5017.63	4.55841	2.18853	7.28883e-06	0.000145485	chrIV	17320758	17328626	plus
WBGene00013086	25340	13548	11250	9195	4947	1818	11621.9	15044.7	15556.8	5177.38	5304.49	4114.46	9469.96	14074.5	4865.44	0.345693	-1.53244	7.30689e-06	0.000145684	chrII	9407755	9408958	plus
WBGene00019522	5686	1838	1476	1259	1094	418	2607.82	2041.05	2041.06	708.898	1173.06	946.01	1586.32	2229.98	942.655	0.42272	-1.24223	7.38429e-06	0.000146901	chrV	6235157	6237654	plus
WBGene00010365	20806	10365	7136	3075	4165	1621	9542.44	11510.1	9867.87	1731.42	4465.98	3668.62	6797.73	10306.8	3288.67	0.319078	-1.64802	7.42894e-06	0.000147604	chrIII	10445479	10451015	minus
WBGene00008558	287	103	104	646	370	297	131.629	114.379	143.814	363.74	396.738	672.165	303.744	129.941	477.547	3.67511	1.87779	7.43605e-06	0.000147604	chrII	8792857	8794107	minus
WBGene00013539	190	139	96	455	325	313	87.1414	154.356	132.752	256.194	348.486	708.376	281.217	124.75	437.685	3.50851	1.81086	7.51101e-06	0.000148763	chrIV	15532465	15539907	minus
WBGene00020075	739	325	231	633	1041	758	338.934	360.904	319.434	356.42	1116.23	1715.49	701.235	339.757	1062.71	3.12786	1.64518	7.52711e-06	0.000148917	chrII	2104529	2106871	plus
WBGene00016310	70	63	42	356	176	145	32.1047	69.9599	58.0788	200.451	188.718	328.161	146.246	53.3811	239.11	4.4793	2.16327	7.56354e-06	0.000149247	chrII	6344276	6345490	plus
WBGene00019417	6211	2163	1617	1729	1108	317	2848.61	2401.96	2236.03	973.539	1188.07	717.428	1727.61	2495.53	959.678	0.384559	-1.37872	7.56869e-06	0.000149247	chrII	1547067	1549959	minus
WBGene00012254	1079	621	631	3445	1601	1237	494.871	689.605	872.565	1939.76	1716.69	2799.56	1418.84	685.68	2152	3.13849	1.65007	7.76148e-06	0.000152881	chrV	19756256	19758522	plus
WBGene00018668	3623	1324	1086	910	597	266	1661.65	1470.27	1501.75	512.389	640.141	602.006	1064.7	1544.56	584.845	0.37865	-1.40107	7.77947e-06	0.00015289	chrII	1921453	1922749	minus
WBGene00007342	10253	5239	3044	2887	2253	730	4702.42	5817.78	4209.33	1625.57	2415.81	1652.12	3403.84	4909.84	1897.83	0.386536	-1.37132	7.79435e-06	0.00015289	chrII	11434157	11434894	plus
WBGene00017365	6973	4660	3813	2123	1526	564	3198.09	5174.81	5272.73	1195.39	1636.27	1276.43	2958.95	4548.54	1369.36	0.301056	-1.7319	7.80564e-06	0.000152912	chrV	7327210	7327737	plus
WBGene00010742	28224	11419	10350	50737	24067	16510	12944.6	12680.5	14312.3	28568.2	25806.2	37365.1	21946.2	13312.5	30579.8	2.29708	1.1998	7.88033e-06	0.000154039	chrV	11193717	11195986	minus
WBGene00007552	3719	2034	1883	7775	4552	3307	1705.68	2258.71	2603.87	4377.83	4880.94	7484.34	3885.23	2189.42	5581.04	2.5491	1.34999	7.89798e-06	0.000154217	chrV	12523628	12525637	minus
WBGene00009932	794	435	432	1872	1131	916	364.159	483.056	597.382	1054.06	1212.73	2073.07	964.076	481.533	1446.62	3.0042	1.58698	7.97598e-06	0.000155539	chrX	11581684	11584893	plus
WBGene00006875	5810	2902	2600	11056	5749	3976	2664.69	3222.6	3595.36	6225.24	6164.44	8998.41	5145.12	3160.88	7129.37	2.2555	1.17345	7.98303e-06	0.000155539	chrII	8636181	8637661	minus
WBGene00013566	951	1043	900	391	200	77	436.165	1158.22	1244.55	220.158	214.453	174.265	574.635	946.312	202.959	0.214473	-2.22113	7.99648e-06	0.00015562	chrV	15109560	15110328	plus
WBGene00006682	238	90	70	427	329	305	109.156	99.9427	96.798	240.429	352.775	690.27	264.895	101.966	427.825	4.19577	2.06894	8.00451e-06	0.00015562	chrI	8808986	8811641	minus
WBGene00021876	5212	2862	2668	11023	6640	4808	2390.43	3178.18	3689.39	6206.66	7119.83	10881.4	5577.64	3086	8069.29	2.61481	1.3867	8.02336e-06	0.000155818	chrIV	2765717	2771788	minus
WBGene00020451	2724	878	623	706	226	62	1249.33	974.997	861.503	397.524	242.332	140.317	644.334	1028.61	260.057	0.252824	-1.98379	8.03454e-06	0.000155867	chrIII	950871	952044	plus
WBGene00018369	3112	1835	1632	7709	3906	2981	1427.28	2037.72	2256.78	4340.67	4188.26	6746.54	3499.54	1907.26	5091.82	2.66971	1.41668	8.06428e-06	0.000156275	chrIII	8466957	8478300	plus
WBGene00006845	624	342	278	1321	820	552	286.191	379.782	384.427	743.808	879.256	1249.28	653.79	350.133	957.447	2.73452	1.45129	8.14732e-06	0.000157714	chrI	14872151	14875367	plus
WBGene00011959	5626	1957	1684	1717	832	347	2580.3	2173.2	2328.68	966.782	892.123	785.324	1621.07	2360.73	881.41	0.373364	-1.42135	8.24196e-06	0.000158783	chrIV	13685049	13686988	minus
WBGene00006783	422	228	239	1181	641	478	193.546	253.188	330.496	664.979	687.321	1081.8	535.222	259.077	811.367	3.13176	1.64698	8.25198e-06	0.000158783	chrIII	10183703	10186299	minus
WBGene00043981	2099	1335	1185	6024	3319	2346	962.683	1482.48	1638.65	3391.9	3558.84	5309.42	2724	1361.27	4086.72	3.00213	1.58599	8.25867e-06	0.000158783	chrX	6559533	6562234	minus
WBGene00010808	83874	46463	31570	24504	20141	7375	38467.9	51596	43655.9	13797.3	21596.5	16691	30967.4	44573.3	17361.6	0.389507	-1.36028	8.2629e-06	0.000158783	chrI	13298213	13300704	minus
WBGene00044074	187	43	52	408	345	148	85.7654	47.7504	71.9071	229.73	369.931	334.951	190.006	68.4743	311.537	4.5497	2.18577	8.26442e-06	0.000158783	chrII	13925194	13930442	plus
WBGene00022389	1859	1119	1080	5047	3340	2520	852.609	1242.62	1493.46	2841.79	3581.36	5703.22	2619.18	1196.23	4042.12	3.37905	1.75662	8.30929e-06	0.000159475	chrI	873484	882716	minus
WBGene00015753	454	382	365	2981	1499	1286	208.222	424.201	504.733	1678.5	1607.32	2910.45	1222.24	379.052	2065.42	5.44892	2.44597	8.36087e-06	0.000160293	chrIII	8108724	8111198	plus
WBGene00011428	81	61	40	197	186	201	37.1497	67.7389	55.3132	110.924	199.441	454.899	154.244	53.4006	255.088	4.77687	2.25607	8.39534e-06	0.000160758	chrV	11064936	11065616	minus
WBGene00010755	6462	2892	2977	13419	5957	3688	2963.72	3211.49	4116.68	7555.76	6387.47	8346.61	5430.29	3430.63	7429.95	2.16577	1.11488	8.40301e-06	0.000160758	chrIII	10295043	10298586	plus
WBGene00018247	3090	855	685	754	354	114	1417.19	949.456	947.238	424.551	379.581	258.003	729.337	1104.63	354.045	0.32051	-1.64156	8.42636e-06	0.000160942	chrIII	171886	172733	plus
WBGene00017969	498	422	379	2722	1753	1300	228.402	468.62	524.092	1532.66	1879.68	2942.14	1262.6	407.038	2118.16	5.20383	2.37957	8.43055e-06	0.000160942	chrII	7232812	7235880	plus
WBGene00010592	174	68	100	646	380	260	79.8031	75.5123	138.283	363.74	407.46	588.427	275.538	97.8661	453.209	4.63091	2.2113	8.54036e-06	0.000162594	chrV	9485741	9489009	plus
WBGene00021458	37426	22102	18118	10756	9262	3350	17165	24543.7	25054.1	6056.32	9931.31	7581.66	15055.4	22254.3	7856.43	0.35303	-1.50214	8.74497e-06	0.000166062	chrI	2279836	2280869	plus
WBGene00018444	10713	4577	3168	2367	2301	792	4913.4	5082.64	4380.8	1332.77	2467.28	1792.44	3328.22	4792.28	1864.16	0.388993	-1.36218	8.95892e-06	0.000169945	chrII	1718181	1719226	minus
WBGene00018283	562	190	185	1145	672	369	257.755	210.99	255.823	644.709	720.561	835.114	487.492	241.523	733.461	3.03682	1.60256	8.98943e-06	0.000170344	chrX	8403486	8408314	minus
WBGene00004921	376	174	265	1742	1495	1425	172.448	193.223	366.45	980.859	1603.03	3225.03	1090.17	244.04	1936.31	7.93439	2.98812	9.00997e-06	0.000170553	chrII	6810920	6816411	plus
WBGene00017295	146	52	77	460	294	186	66.9613	57.7447	106.478	259.01	315.246	420.952	204.398	77.0613	331.736	4.30483	2.10596	9.02353e-06	0.00017063	chrX	1489714	1494351	minus
WBGene00010722	202	124	130	766	406	288	92.645	137.699	179.768	431.308	435.339	651.796	321.426	136.704	506.148	3.70251	1.8885	9.04985e-06	0.000170948	chrII	14114137	14122090	minus
WBGene00007353	841	482	387	1164	1137	895	385.715	535.249	535.155	655.407	1219.16	2025.55	892.706	485.373	1300.04	2.67843	1.42139	9.13387e-06	0.000172225	chrII	10568845	10572056	plus
WBGene00000089	820	328	338	1374	927	747	376.084	364.236	467.396	773.651	993.988	1690.6	777.659	402.572	1152.75	2.86345	1.51776	9.14623e-06	0.000172225	chrI	13543021	13545179	minus
WBGene00004246	1744	676	579	378	266	139	799.866	750.681	800.658	212.838	285.222	314.582	527.308	783.735	270.881	0.345628	-1.53271	9.16427e-06	0.000172384	chrI	212256	215491	minus
WBGene00008277	597	386	426	1877	2007	1700	273.807	428.643	589.085	1056.87	2152.03	3847.41	1391.31	430.512	2352.1	5.46351	2.44983	9.22096e-06	0.000173032	chrIV	8993071	9000758	plus
WBGene00010899	3782	2152	1701	6754	4338	2844	1734.57	2389.74	2352.19	3802.94	4651.48	6436.49	3561.24	2158.84	4963.64	2.29922	1.20114	9.22262e-06	0.000173032	chrII	10628210	10633158	plus
WBGene00016307	33914	13956	9419	8750	7555	2487	15554.3	15497.8	13024.9	4926.82	8100.95	5628.53	10455.5	14692.3	6218.77	0.423267	-1.24036	9.22759e-06	0.000173032	chrII	965587	966966	minus
WBGene00019448	690	293	249	1382	693	608	316.461	325.369	344.324	778.155	743.079	1376.01	647.234	328.718	965.749	2.93793	1.5548	9.35922e-06	0.000175134	chrV	8899254	8902192	plus
WBGene00017721	1023	751	632	3352	2369	1844	469.187	833.966	873.948	1887.39	2540.19	4173.31	1796.33	725.701	2866.96	3.95062	1.98208	9.41526e-06	0.000176	chrV	2110703	2115459	plus
WBGene00010519	34008	20683	14792	9224	8354	2895	15597.4	22967.9	20454.8	5193.71	8957.69	6551.91	13287.2	19673.4	6901.1	0.350784	-1.51135	9.54095e-06	0.000177979	chrX	13051727	13055339	plus
WBGene00001457	94	53	39	281	202	169	43.112	58.8551	53.9303	158.221	216.597	382.478	152.199	51.9658	252.432	4.85765	2.28026	9.61236e-06	0.000179125	chrIII	12910128	12914833	plus
WBGene00007182	11548	4507	3477	3496	2099	784	5296.36	5004.91	4808.1	1968.47	2250.68	1774.33	3517.14	5036.46	1997.83	0.396674	-1.33397	9.63019e-06	0.000179153	chrV	18318567	18319748	plus
WBGene00018772	595	284	220	1324	682	454	272.89	315.375	304.222	745.498	731.284	1027.48	566.125	297.496	834.755	2.80594	1.48848	9.63383e-06	0.000179153	chrI	134337	137332	plus
WBGene00017327	1177	650	438	1658	1477	1098	539.818	721.808	605.679	933.561	1583.73	2484.97	1144.93	622.435	1667.42	2.67887	1.42162	9.64418e-06	0.00017916	chrII	5754448	5756683	plus
WBGene00010451	7221	2540	2096	2109	1164	517	3311.83	2820.61	2898.41	1187.5	1248.11	1170.06	2106.09	3010.28	1201.89	0.399263	-1.32459	9.71268e-06	0.000180247	chrIII	3447128	3453972	minus
WBGene00018274	1026	541	472	2424	1134	663	470.563	600.767	652.695	1364.87	1215.95	1500.49	967.555	574.675	1360.43	2.36731	1.24325	9.89737e-06	0.000183106	chrII	4716044	4718523	plus
WBGene00016309	31820	12773	8453	6745	6853	2317	14593.9	14184.1	11689.1	3797.87	7348.22	5243.79	9476.15	13489	5463.3	0.405018	-1.30394	1.00881e-05	0.000186391	chrII	958968	960186	plus
WBGene00004220	5935	3215	3114	14571	6883	5235	2722.02	3570.18	4306.13	8204.42	7380.39	11847.8	6338.48	3532.78	9144.19	2.58839	1.37205	1.02751e-05	0.000189315	chrX	17318510	17326529	plus
WBGene00009811	2080	772	707	4618	1527	1042	953.969	857.286	977.66	2600.23	1637.35	2358.23	1564.12	929.638	2198.6	2.36501	1.24185	1.02988e-05	0.000189558	chrV	14343053	14345645	plus
WBGene00011427	2212	1229	1245	6379	3009	2486	1014.51	1364.77	1721.62	3591.79	3226.44	5626.27	2757.57	1366.97	4148.17	3.03457	1.60149	1.03203e-05	0.000189641	chrV	11058631	11059246	minus
[truncated: 2,600 more rows]

## Sheet: wdr-5 up
WBGeneID	WT_1	WT_2	WT_3	wdr5_1	wdr5_2	wdr5_3	WT_1_norm	WT_2_norm	WT_3_norm	wdr5_1_norm	wdr5_2_norm	wdr5_3_norm	baseMean	baseMeanA	baseMeanB	foldChange	log2FoldChange	pval	padj	chrom	start	end	strand
[truncated: 2,269 more rows]

[truncated: 4 more sheets: wdr-5 down, rbbp-5_wdr-5 DEGs, rbbp-5_wdr-5 up, rbbp-5_wdr-5 down]
